# Supplementary material for: Causal relationship between immune cells and bladder cancer: a bi-directional Mendelian randomization study
Source: Research Square preprint supplement (doi:10.21203/rs.3.rs-4540897/v1), 2024-06-26
Supplement: Supplementary file 1 [file 07992bff5405dd34affe3999.xlsx]

## Sheet: Table 2.xlsx
					Supplementary Table 2: Detailed information of instrumental variables used in MR analyses about immune cells on bladder cancer
exposure	SNP	effect_allele.exposure	other_allele.exposure	effect_allele.outcome	other_allele.outcome	beta.exposure	beta.outcome	eaf.exposure	eaf.outcome	remove	palindromic	ambiguous	chr.outcome	pos.outcome	se.outcome	pval.outcome	outcome	mr_keep.outcome	pval.exposure	chr.exposure	pos.exposure	samplesize.exposure	se.exposure	mr_keep.exposure	action	SNP_index	mr_keep	samplesize.outcome
CD11b on CD33br HLA DR+ CD14dim	rs11015080	T	A	T	A	-0.172	-3.57e-05	0.5856	0.60233	FALSE	TRUE	FALSE	10	26677896	0.000138	0.8	bladder cancer	TRUE	3.23e-06	10	26677896	1578	0.03681	TRUE	2	1	TRUE	NA
CD11b on CD33br HLA DR+ CD14dim	rs140129370	C	T	C	T	-0.8413	0.000627	0.0114	0.015147	FALSE	FALSE	FALSE	13	74097996	0.000573	0.27	bladder cancer	TRUE	7.04e-07	13	74097996	1578	0.1689	TRUE	2	1	TRUE	NA
CD11b on CD33br HLA DR+ CD14dim	rs142436127	A	T	A	T	-1.066	0.00022	0.0067	0.022786	FALSE	TRUE	FALSE	3	118883955	0.000464	0.630001	bladder cancer	TRUE	4.95e-06	3	118883955	1578	0.2325	TRUE	2	1	TRUE	NA
CD11b on CD33br HLA DR+ CD14dim	rs142470748	A	G	A	G	0.6737	-0.000547	0.0143	0.017567	FALSE	FALSE	FALSE	7	55375099	0.000527	0.3	bladder cancer	TRUE	6.88e-06	7	55375099	1578	0.1493	TRUE	2	1	TRUE	NA
CD11b on CD33br HLA DR+ CD14dim	rs146147816	A	G	A	G	1.104	-0.000704	0.0067	0.009783	FALSE	FALSE	FALSE	14	73306094	0.000697	0.31	bladder cancer	TRUE	8.81e-07	14	73295385	1578	0.2236	TRUE	2	1	TRUE	NA
CD11b on CD33br HLA DR+ CD14dim	rs1801274	G	A	G	A	0.4941	-0.000227	0.3305	0.529944	FALSE	FALSE	FALSE	1	161479745	0.000136	0.0940005	bladder cancer	TRUE	1.43e-38	1	161479745	1578	0.03702	TRUE	2	1	TRUE	NA
CD11b on CD33br HLA DR+ CD14dim	rs1930423	A	T	A	T	-0.3105	0.000151	0.0713	0.076613	FALSE	TRUE	FALSE	9	101407173	0.000255	0.55	bladder cancer	TRUE	6.67e-06	9	101407173	1578	0.06871	TRUE	2	1	TRUE	NA
CD11b on CD33br HLA DR+ CD14dim	rs2552498	C	T	C	T	0.2014	8.21e-05	0.7706	0.827616	FALSE	FALSE	FALSE	18	38751659	0.00018	0.649999	bladder cancer	TRUE	2.52e-06	18	38747705	1578	0.04263	TRUE	2	1	TRUE	NA
CD11b on CD33br HLA DR+ CD14dim	rs55978635	G	C	G	C	0.1631	-1.78e-05	0.3606	0.324984	FALSE	TRUE	FALSE	17	75786314	0.000145	0.9	bladder cancer	TRUE	7.47e-06	17	75786314	1578	0.03629	TRUE	2	1	TRUE	NA
CD11b on CD33br HLA DR+ CD14dim	rs57761043	A	G	A	G	-0.4766	-0.000266	0.0292	0.035348	FALSE	FALSE	FALSE	12	218152	0.000368	0.47	bladder cancer	TRUE	9.32e-06	12	218152	1578	0.1072	TRUE	2	1	TRUE	NA
CD11b on CD33br HLA DR+ CD14dim	rs61952076	A	G	A	G	-0.2557	0.000498	0.1119	0.058746	FALSE	FALSE	FALSE	12	133089630	0.000295	0.0909997	bladder cancer	TRUE	7.64e-06	12	133089630	1578	0.05696	TRUE	2	1	TRUE	NA
CD11b on CD33br HLA DR+ CD14dim	rs62561188	C	T	C	T	0.3263	-0.000378	0.0669	0.023915	FALSE	FALSE	FALSE	9	87310577	0.000447	0.4	bladder cancer	TRUE	6.42e-06	9	87310577	1578	0.07207	TRUE	2	1	TRUE	NA
CD11b on CD33br HLA DR+ CD14dim	rs66811768	T	G	T	G	-0.2427	-0.00022	0.1188	0.139678	FALSE	FALSE	FALSE	10	9580495	0.000196	0.26	bladder cancer	TRUE	9.73e-06	10	9580495	1578	0.05469	TRUE	2	1	TRUE	NA
CD11b on CD33br HLA DR+ CD14dim	rs7166641	T	C	T	C	0.1643	-0.000119	0.5957	0.446051	FALSE	FALSE	FALSE	15	84637928	0.000136	0.38	bladder cancer	TRUE	4.77e-06	15	84637928	1578	0.03578	TRUE	2	1	TRUE	NA
CD11b on CD33br HLA DR+ CD14dim	rs72815426	G	A	G	A	0.7221	0.000321	0.0124	0.01581	FALSE	FALSE	FALSE	17	11788269	0.00056	0.57	bladder cancer	TRUE	5.3e-06	17	11788269	1578	0.1581	TRUE	2	1	TRUE	NA
CD11b on CD33br HLA DR+ CD14dim	rs72983710	T	C	T	C	-0.3751	0.000106	0.0504	0.105252	FALSE	FALSE	FALSE	18	75884528	0.000226	0.64	bladder cancer	TRUE	5.05e-06	18	75884528	1578	0.08192	TRUE	2	1	TRUE	NA
CD11b on CD33br HLA DR+ CD14dim	rs75948515	T	G	T	G	0.3401	9.3e-05	0.0703	0.101482	FALSE	FALSE	FALSE	15	51443825	0.000225	0.68	bladder cancer	TRUE	2.01e-06	15	51443825	1578	0.07129	TRUE	2	1	TRUE	NA
CD11b on CD33br HLA DR+ CD14dim	rs76769365	C	G	C	G	0.3891	0.000477	0.0428	0.017829	FALSE	TRUE	FALSE	2	201489162	0.000513	0.35	bladder cancer	TRUE	9.69e-06	2	201489162	1578	0.08767	TRUE	2	1	TRUE	NA
CD11b on CD33br HLA DR+ CD14dim	rs79788679	G	A	G	A	0.3209	-0.000338	0.083	0.12462	FALSE	FALSE	FALSE	7	92609625	0.000206	0.1	bladder cancer	TRUE	3.44e-07	7	92609625	1578	0.06268	TRUE	2	1	TRUE	NA
CD11b on CD33br HLA DR+ CD14dim	rs80184675	A	G	A	G	-0.2884	8.87e-05	0.0887	0.07262	FALSE	FALSE	FALSE	16	83304908	0.000265	0.74	bladder cancer	TRUE	9.28e-06	16	83304908	1578	0.06484	TRUE	2	1	TRUE	NA
CD11b on CD33br HLA DR+ CD14dim	rs846294	C	G	C	G	0.1828	-6.63e-05	0.3213	0.35121	FALSE	TRUE	FALSE	7	42123925	0.000143	0.64	bladder cancer	TRUE	9.71e-07	7	42123925	1578	0.03718	TRUE	2	1	TRUE	NA
CD19 on IgD- CD24-	rs10192011	T	G	T	G	0.1236	0.000209	0.29	0.175502	FALSE	FALSE	FALSE	2	53804261	0.000178	0.24	bladder cancer	TRUE	5.32e-06	2	53804261	3655	0.02711	TRUE	2	1	TRUE	NA
CD19 on IgD- CD24-	rs10906006	A	G	A	G	0.1265	-0.000197	0.7248	0.736254	FALSE	FALSE	FALSE	10	11781967	0.000153	0.2	bladder cancer	TRUE	3.42e-06	10	11781967	3655	0.0272	TRUE	2	1	TRUE	NA
CD19 on IgD- CD24-	rs10928415	A	G	A	G	0.1356	-6.55e-05	0.7917	0.742499	FALSE	FALSE	FALSE	2	149553139	0.000155	0.67	bladder cancer	TRUE	8.56e-06	2	149553139	3655	0.03043	TRUE	2	1	TRUE	NA
CD19 on IgD- CD24-	rs1164128	C	T	C	T	0.1146	3.9e-05	0.3759	0.435654	FALSE	FALSE	FALSE	13	112057432	0.000136	0.77	bladder cancer	TRUE	5.18e-06	13	112057432	3655	0.02511	TRUE	2	1	TRUE	NA
CD19 on IgD- CD24-	rs11643297	G	A	G	A	0.114	-0.000332	0.6112	0.698088	FALSE	FALSE	FALSE	16	28988269	0.000148	0.025	bladder cancer	TRUE	7.72e-06	16	28973268	3655	0.02546	TRUE	2	1	TRUE	NA
CD19 on IgD- CD24-	rs12968867	A	G	A	G	-0.1275	-0.000118	0.6743	0.731589	FALSE	FALSE	FALSE	18	60850310	0.000153	0.44	bladder cancer	TRUE	1.28e-06	18	60850310	3655	0.02628	TRUE	2	1	TRUE	NA
CD19 on IgD- CD24-	rs1453509	A	C	A	C	-0.1879	5.62e-05	0.1181	0.230485	FALSE	FALSE	FALSE	16	17016084	0.00016	0.73	bladder cancer	TRUE	7.9e-07	16	17014673	3655	0.03799	TRUE	2	1	TRUE	NA
CD19 on IgD- CD24-	rs148597489	A	C	A	C	-0.8449	0.00106482	0.0045	0.026345	FALSE	FALSE	FALSE	6	72550483	0.000434	0.0140001	bladder cancer	TRUE	2.78e-06	6	72550483	3655	0.18	TRUE	2	1	TRUE	NA
CD19 on IgD- CD24-	rs16884870	C	T	C	T	0.2135	0.000362	0.0795	0.080988	FALSE	FALSE	FALSE	6	75109409	0.000248	0.14	bladder cancer	TRUE	3.21e-06	6	75109409	3655	0.04578	TRUE	2	1	TRUE	NA
CD19 on IgD- CD24-	rs17315418	A	G	A	G	0.1196	5.43e-05	0.3174	0.362374	FALSE	FALSE	FALSE	15	70028833	0.000141	0.7	bladder cancer	TRUE	7.7e-06	15	70028833	3655	0.02669	TRUE	2	1	TRUE	NA
CD19 on IgD- CD24-	rs242172	G	T	G	T	0.58	0.000584	0.0093	0.019077	FALSE	FALSE	FALSE	3	60405606	0.000507	0.25	bladder cancer	TRUE	6.8e-06	3	60405606	3655	0.1287	TRUE	2	1	TRUE	NA
CD19 on IgD- CD24-	rs2613786	A	G	A	G	-0.1142	-0.0001	0.3739	0.476217	FALSE	FALSE	FALSE	19	5137846	0.000136	0.46	bladder cancer	TRUE	6.98e-06	19	5137846	3655	0.02536	TRUE	2	1	TRUE	NA
CD19 on IgD- CD24-	rs61884722	C	T	C	T	0.8939	-0.00109537	0.0041	0.016778	FALSE	FALSE	FALSE	11	18601510	0.000541	0.0430002	bladder cancer	TRUE	3.71e-06	11	18601510	3655	0.1929	TRUE	2	1	TRUE	NA
CD19 on IgD- CD24-	rs631691	T	C	T	C	-0.1105	0.000139	0.52	0.494868	FALSE	FALSE	FALSE	3	124875178	0.000136	0.31	bladder cancer	TRUE	9.09e-06	3	124875178	3655	0.02487	TRUE	2	1	TRUE	NA
CD19 on IgD- CD24-	rs71307996	A	G	A	G	0.3537	-0.000527	0.0272	0.027369	FALSE	FALSE	FALSE	3	1103352	0.000418	0.21	bladder cancer	TRUE	2.11e-06	3	1103352	3655	0.07444	TRUE	2	1	TRUE	NA
CD19 on IgD- CD24-	rs73056862	T	C	T	C	0.2705	-0.000108	0.0461	0.096767	FALSE	FALSE	FALSE	19	52235616	0.00023	0.64	bladder cancer	TRUE	3.82e-06	19	52235616	3655	0.05845	TRUE	2	1	TRUE	NA
CD19 on IgD- CD24-	rs73254441	A	G	A	G	0.3945	-0.000203	0.0201	0.040244	FALSE	FALSE	FALSE	5	113295200	0.000348	0.56	bladder cancer	TRUE	9.75e-06	5	113295200	3655	0.08906	TRUE	2	1	TRUE	NA
CD19 on IgD- CD24-	rs7332415	G	A	G	A	-0.2327	0.000444	0.0648	0.075613	FALSE	FALSE	FALSE	13	41688557	0.000258	0.0850002	bladder cancer	TRUE	3.3e-06	13	41688557	3655	0.04996	TRUE	2	1	TRUE	NA
CD19 on IgD- CD24-	rs75656751	T	C	T	C	-0.3513	0.000212	0.0246	0.046683	FALSE	FALSE	FALSE	21	38055091	0.00032	0.51	bladder cancer	TRUE	9.53e-06	21	38055091	3655	0.07924	TRUE	2	1	TRUE	NA
CD19 on IgD- CD24-	rs75663256	A	C	A	C	0.1904	-0.000143	0.0896	0.174716	FALSE	FALSE	FALSE	8	69897907	0.000179	0.42	bladder cancer	TRUE	9.17e-06	8	69895735	3655	0.04286	TRUE	2	1	TRUE	NA
CD19 on IgD- CD24-	rs76451648	C	T	C	T	0.2777	0.000179	0.0469	0.054466	FALSE	FALSE	FALSE	4	139618949	0.000298	0.55	bladder cancer	TRUE	2e-06	4	139618949	3655	0.05834	TRUE	2	1	TRUE	NA
CD19 on IgD- CD27-	rs10192011	T	G	T	G	0.1217	0.000209	0.2899	0.175502	FALSE	FALSE	FALSE	2	53804261	0.000178	0.24	bladder cancer	TRUE	7.44e-06	2	53804261	3656	0.02711	TRUE	2	1	TRUE	NA
CD19 on IgD- CD27-	rs10216993	T	C	T	C	-0.1112	2.94e-05	0.4624	0.451259	FALSE	FALSE	FALSE	8	142521360	0.000137	0.83	bladder cancer	TRUE	6.26e-06	8	142521360	3656	0.02458	TRUE	2	1	TRUE	NA
CD19 on IgD- CD27-	rs10821075	A	G	A	G	-0.1158	0.000161	0.4393	0.489372	FALSE	FALSE	FALSE	9	95896099	0.000135	0.23	bladder cancer	TRUE	2.73e-06	9	95896099	3656	0.02466	TRUE	2	1	TRUE	NA
CD19 on IgD- CD27-	rs113612962	C	G	C	G	-0.2905	0.000358	0.0402	0.049978	FALSE	TRUE	FALSE	22	43167446	0.000314	0.25	bladder cancer	TRUE	3.85e-06	22	43167446	3656	0.06279	TRUE	2	1	TRUE	NA
CD19 on IgD- CD27-	rs113747920	C	T	C	T	0.6675	0.000308597	0.0067	0.017116	FALSE	FALSE	FALSE	1	27453519	0.000534	0.56	bladder cancer	TRUE	7.89e-06	1	27453519	3656	0.1492	TRUE	2	1	TRUE	NA
CD19 on IgD- CD27-	rs115952864	A	G	A	G	0.414	0.000121	0.0208	0.018843	FALSE	FALSE	FALSE	4	173244216	0.000501	0.81	bladder cancer	TRUE	1.44e-06	4	173244216	3656	0.08576	TRUE	2	1	TRUE	NA
CD19 on IgD- CD27-	rs116412781	T	C	T	C	0.2691	0.000423	0.0475	0.026381	FALSE	FALSE	FALSE	4	2746567	0.000424	0.32	bladder cancer	TRUE	4.18e-06	4	2746567	3656	0.05837	TRUE	2	1	TRUE	NA
CD19 on IgD- CD27-	rs11643297	G	A	G	A	0.1162	-0.000332	0.6111	0.698088	FALSE	FALSE	FALSE	16	28988269	0.000148	0.025	bladder cancer	TRUE	5.23e-06	16	28973268	3656	0.02547	TRUE	2	1	TRUE	NA
CD19 on IgD- CD27-	rs12636323	T	G	T	G	0.1142	-7.08e-05	0.3952	0.459081	FALSE	FALSE	FALSE	3	100795843	0.000139	0.61	bladder cancer	TRUE	8.12e-06	3	100795543	3656	0.02557	TRUE	2	1	TRUE	NA
CD19 on IgD- CD27-	rs12968867	A	G	A	G	-0.137	-0.000118	0.6744	0.731589	FALSE	FALSE	FALSE	18	60850310	0.000153	0.44	bladder cancer	TRUE	1.92e-07	18	60850310	3656	0.02626	TRUE	2	1	TRUE	NA
CD19 on IgD- CD27-	rs138920008	C	G	C	G	-1.105	0.000353	0.0041	0.025737	FALSE	TRUE	FALSE	16	32422808	0.000514	0.49	bladder cancer	TRUE	4.54e-07	16	32422808	3656	0.2187	TRUE	2	1	TRUE	NA
CD19 on IgD- CD27-	rs142291539	A	G	A	G	0.3565	2.85e-05	0.0269	0.023105	FALSE	FALSE	FALSE	5	175612761	0.000451	0.95	bladder cancer	TRUE	5.32e-06	5	175612761	3656	0.07821	TRUE	2	1	TRUE	NA
CD19 on IgD- CD27-	rs144574165	T	C	T	C	0.2567	-0.000804	0.0581	0.017885	FALSE	FALSE	FALSE	4	163336202	0.00052	0.12	bladder cancer	TRUE	1.64e-06	4	163336202	3656	0.05347	TRUE	2	1	TRUE	NA
CD19 on IgD- CD27-	rs148390689	C	T	C	T	-0.4166	0.000227	0.0186	0.018543	FALSE	FALSE	FALSE	13	20089809	0.000514	0.66	bladder cancer	TRUE	5.27e-06	13	20089809	3656	0.09136	TRUE	2	1	TRUE	NA
CD19 on IgD- CD27-	rs1524155	A	T	A	T	0.1482	-0.000439	0.8079	0.637969	FALSE	TRUE	FALSE	2	48878727	0.000141	0.00179999	bladder cancer	TRUE	2e-06	2	48878727	3656	0.03114	TRUE	2	1	TRUE	NA
CD19 on IgD- CD27-	rs242172	G	T	G	T	0.6101	0.000584	0.0093	0.019077	FALSE	FALSE	FALSE	3	60405606	0.000507	0.25	bladder cancer	TRUE	2.14e-06	3	60405606	3656	0.1285	TRUE	2	1	TRUE	NA
CD19 on IgD- CD27-	rs34205222	A	G	A	G	0.3581	-0.000351	0.0279	0.029189	FALSE	FALSE	FALSE	3	1066077	0.000401	0.38	bladder cancer	TRUE	1.14e-06	3	1066077	3656	0.07346	TRUE	2	1	TRUE	NA
CD19 on IgD- CD27-	rs59102092	C	A	C	A	-0.1649	0.000246	0.1368	0.152049	FALSE	FALSE	FALSE	1	39551423	0.000188	0.19	bladder cancer	TRUE	5.23e-06	1	39551423	3656	0.03615	TRUE	2	1	TRUE	NA
CD19 on IgD- CD27-	rs61884722	C	T	C	T	0.8987	-0.00109537	0.0041	0.016778	FALSE	FALSE	FALSE	11	18601510	0.000541	0.0430002	bladder cancer	TRUE	3.18e-06	11	18601510	3656	0.1926	TRUE	2	1	TRUE	NA
CD19 on IgD- CD27-	rs631691	T	C	T	C	-0.1133	0.000139	0.5201	0.494868	FALSE	FALSE	FALSE	3	124875178	0.000136	0.31	bladder cancer	TRUE	5.36e-06	3	124875178	3656	0.02486	TRUE	2	1	TRUE	NA
CD19 on IgD- CD27-	rs6577565	C	T	C	T	-0.1228	0.000204	0.6823	0.756836	FALSE	FALSE	FALSE	1	6307255	0.000158	0.2	bladder cancer	TRUE	4.23e-06	1	6307255	3656	0.02666	TRUE	2	1	TRUE	NA
CD19 on IgD- CD27-	rs71555251	A	G	A	G	0.2028	0.000362	0.0796	0.080992	FALSE	FALSE	FALSE	6	75109171	0.000248	0.14	bladder cancer	TRUE	9.58e-06	6	75109171	3656	0.04575	TRUE	2	1	TRUE	NA
CD19 on IgD- CD27-	rs75663256	A	C	A	C	0.1981	-0.000143	0.0896	0.174716	FALSE	FALSE	FALSE	8	69897907	0.000179	0.42	bladder cancer	TRUE	3.91e-06	8	69895735	3656	0.04284	TRUE	2	1	TRUE	NA
CD19 on IgD- CD27-	rs7608595	C	T	C	T	0.1193	-0.00011	0.6675	0.560939	FALSE	FALSE	FALSE	2	223088415	0.000137	0.42	bladder cancer	TRUE	4.97e-06	2	223088415	3656	0.02609	TRUE	2	1	TRUE	NA
CD19 on IgD- CD27-	rs9350187	T	C	T	C	-0.2277	-0.000152	0.0607	0.075294	FALSE	FALSE	FALSE	6	19794487	0.000257	0.55	bladder cancer	TRUE	8.95e-06	6	19794487	3656	0.05119	TRUE	2	1	TRUE	NA
CD25 on CD39+ resting Treg	rs117447663	T	C	T	C	-0.7139	6.24e-05	0.008	0.019769	FALSE	FALSE	FALSE	10	68626431	0.000502	0.9	bladder cancer	TRUE	3.55e-07	10	68626431	3118	0.1399	TRUE	2	1	TRUE	NA
CD25 on CD39+ resting Treg	rs139668159	C	A	C	A	-0.7821	-0.00100356	0.0056	0.010597	FALSE	FALSE	FALSE	3	151248680	0.000681	0.14	bladder cancer	TRUE	8.75e-06	3	151248680	3118	0.1756	TRUE	2	1	TRUE	NA
CD25 on CD39+ resting Treg	rs17184074	A	G	A	G	0.2554	0.000151	0.0516	0.069844	FALSE	FALSE	FALSE	20	37805444	0.000265	0.57	bladder cancer	TRUE	8.7e-06	20	37805444	3118	0.05732	TRUE	2	1	TRUE	NA
CD25 on CD39+ resting Treg	rs28478882	T	C	T	C	0.4804	0.000716	0.0157	0.014762	FALSE	FALSE	FALSE	19	49021549	0.000563	0.2	bladder cancer	TRUE	3.57e-06	19	49021549	3118	0.1035	TRUE	2	1	TRUE	NA
CD25 on CD39+ resting Treg	rs3095996	G	A	G	A	0.118	0.000177	0.3817	0.451815	FALSE	FALSE	FALSE	5	157370372	0.000136	0.19	bladder cancer	TRUE	8.64e-06	5	157370372	3118	0.02647	TRUE	2	1	TRUE	NA
CD25 on CD39+ resting Treg	rs4758500	T	C	T	C	0.1886	-0.000252	0.1342	0.067785	FALSE	FALSE	FALSE	11	3454330	0.000273	0.36	bladder cancer	TRUE	1.53e-06	11	3454330	3118	0.03916	TRUE	2	1	TRUE	NA
CD25 on CD39+ resting Treg	rs62043866	T	C	T	C	0.1705	-0.000213	0.1283	0.194487	FALSE	FALSE	FALSE	16	81444190	0.000171	0.21	bladder cancer	TRUE	7.87e-06	16	81444190	3118	0.03808	TRUE	2	1	TRUE	NA
CD25 on CD39+ resting Treg	rs6477716	G	A	G	A	0.1211	0.000318	0.3914	0.472655	FALSE	FALSE	FALSE	9	112390854	0.000136	0.0189998	bladder cancer	TRUE	4.74e-06	9	112390854	3118	0.02641	TRUE	2	1	TRUE	NA
CD25 on CD39+ resting Treg	rs6681289	A	G	A	G	-0.186	1.66e-05	0.1884	0.134275	FALSE	FALSE	FALSE	1	119421209	0.000199	0.93	bladder cancer	TRUE	2.73e-08	1	119421209	3118	0.03337	TRUE	2	1	TRUE	NA
CD25 on CD39+ resting Treg	rs72804108	T	C	T	C	-0.4909	-0.000276	0.0152	0.042342	FALSE	FALSE	FALSE	5	134635583	0.000338	0.41	bladder cancer	TRUE	4.04e-06	5	134635583	3118	0.1063	TRUE	2	1	TRUE	NA
CD25 on CD39+ resting Treg	rs76433036	A	G	A	G	-0.2639	-0.00077	0.0552	0.026445	FALSE	FALSE	FALSE	1	5264834	0.000425	0.0700003	bladder cancer	TRUE	3.02e-06	1	5264834	3118	0.05642	TRUE	2	1	TRUE	NA
CD25 on CD39+ resting Treg	rs78950918	C	G	C	G	0.631	0.00103543	0.0088	0.014407	FALSE	TRUE	FALSE	19	51786661	0.000614	0.0920005	bladder cancer	TRUE	4.52e-06	19	51786661	3118	0.1374	TRUE	2	1	TRUE	NA
CD28 on CD28+ CD4+	rs11060804	A	G	A	G	-0.2773	0.00012	0.0509	0.088876	FALSE	FALSE	FALSE	12	130767902	0.00024	0.62	bladder cancer	TRUE	9.21e-06	12	130767902	2920	0.06242	TRUE	2	1	TRUE	NA
CD28 on CD28+ CD4+	rs111970139	G	A	G	A	-0.3439	8.3e-05	0.0324	0.018808	FALSE	FALSE	FALSE	8	137644190	0.000526	0.87	bladder cancer	TRUE	9.22e-06	8	137644190	2920	0.0774	TRUE	2	1	TRUE	NA
CD28 on CD28+ CD4+	rs1123285	G	C	G	C	0.1358	-0.000125	0.2844	0.327632	FALSE	TRUE	FALSE	14	57283934	0.000144	0.39	bladder cancer	TRUE	8.34e-06	14	57274519	2920	0.03042	TRUE	2	1	TRUE	NA
CD28 on CD28+ CD4+	rs115478283	G	A	G	A	-0.2738	-8.34e-05	0.057	0.025922	FALSE	FALSE	FALSE	4	13704839	0.000433	0.85	bladder cancer	TRUE	2.56e-06	4	13704839	2920	0.05811	TRUE	2	1	TRUE	NA
CD28 on CD28+ CD4+	rs116298583	T	A	T	A	0.1936	3.73e-06	0.1384	0.025926	FALSE	TRUE	FALSE	4	24489778	0.00043	0.99	bladder cancer	TRUE	1.17e-06	4	24489778	2920	0.03974	TRUE	2	1	TRUE	NA
CD28 on CD28+ CD4+	rs117505260	T	G	T	G	0.2676	1.84e-05	0.0563	0.035483	FALSE	FALSE	FALSE	13	113724248	0.000366	0.96	bladder cancer	TRUE	4.88e-06	13	113724248	2920	0.05846	TRUE	2	1	TRUE	NA
CD28 on CD28+ CD4+	rs13023055	A	G	A	G	-0.249	0.000143	0.0705	0.060882	FALSE	FALSE	FALSE	2	20856144	0.000295	0.630001	bladder cancer	TRUE	2.88e-06	2	20856144	2920	0.0531	TRUE	2	1	TRUE	NA
CD28 on CD28+ CD4+	rs138089143	C	G	C	G	0.6661	-0.000572	0.0079	0.010447	FALSE	TRUE	FALSE	1	32615715	0.000687	0.4	bladder cancer	TRUE	7.52e-06	1	32615715	2920	0.1485	TRUE	2	1	TRUE	NA
CD28 on CD28+ CD4+	rs142599237	T	C	T	C	-2.331	0.000478	0.0007	0.014029	FALSE	FALSE	FALSE	10	114914004	0.000624	0.44	bladder cancer	TRUE	7.72e-06	10	114914004	2920	0.5201	TRUE	2	1	TRUE	NA
CD28 on CD28+ CD4+	rs16954045	T	C	T	C	-0.2056	-0.000126	0.1279	0.113627	FALSE	FALSE	FALSE	15	70299168	0.000213	0.55	bladder cancer	TRUE	5.71e-07	15	70299168	2920	0.04102	TRUE	2	1	TRUE	NA
CD28 on CD28+ CD4+	rs17640797	A	G	A	G	-0.4003	0.000345	0.0233	0.024336	FALSE	FALSE	FALSE	11	56654147	0.000439	0.43	bladder cancer	TRUE	8.78e-06	11	56654147	2920	0.0899	TRUE	2	1	TRUE	NA
CD28 on CD28+ CD4+	rs1973872	G	T	G	T	0.3858	4.71e-05	0.601	0.740366	FALSE	FALSE	FALSE	2	204631016	0.000154	0.760001	bladder cancer	TRUE	2.24e-42	2	204631016	2920	0.02783	TRUE	2	1	TRUE	NA
CD28 on CD28+ CD4+	rs3128990	T	C	T	C	-0.1396	0.000274	0.5247	0.422354	FALSE	FALSE	FALSE	6	29878483	0.000143	0.0560003	bladder cancer	TRUE	9.8e-06	6	29878483	2920	0.03152	TRUE	2	1	TRUE	NA
CD28 on CD28+ CD4+	rs3133072	C	T	C	T	0.1222	0.000234	0.5158	0.635349	FALSE	FALSE	FALSE	11	134196629	0.000141	0.0959997	bladder cancer	TRUE	6.69e-06	11	134196629	2920	0.02709	TRUE	2	1	TRUE	NA
CD28 on CD28+ CD4+	rs360711	G	T	G	T	-0.1998	-8.22e-05	0.8911	0.840812	FALSE	FALSE	FALSE	3	138691912	0.000186	0.66	bladder cancer	TRUE	6.4e-06	3	138691912	2920	0.0442	TRUE	2	1	TRUE	NA
CD28 on CD28+ CD4+	rs55637775	A	G	A	G	0.1763	-4.89e-06	0.1815	0.077614	FALSE	FALSE	FALSE	8	72575417	0.000254	0.98	bladder cancer	TRUE	7.8e-07	8	72575417	2920	0.0356	TRUE	2	1	TRUE	NA
CD28 on CD28+ CD4+	rs5751902	T	C	T	C	0.1429	1.16e-05	0.3435	0.380879	FALSE	FALSE	FALSE	22	24996630	0.000145	0.94	bladder cancer	TRUE	8.94e-07	22	24996630	2920	0.02903	TRUE	2	1	TRUE	NA
CD28 on CD28+ CD4+	rs59159369	G	T	G	T	-0.4929	-7.3e-05	0.0193	0.058455	FALSE	FALSE	FALSE	5	125344924	0.000289	0.8	bladder cancer	TRUE	8.93e-07	5	125344924	2920	0.1001	TRUE	2	1	TRUE	NA
CD28 on CD28+ CD4+	rs62458220	C	T	C	T	-0.8432	0.000175	0.006	0.040465	FALSE	FALSE	FALSE	7	43252572	0.000343	0.61	bladder cancer	TRUE	3.52e-06	7	43252572	2920	0.1814	TRUE	2	1	TRUE	NA
CD28 on CD28+ CD4+	rs62542710	G	A	G	A	-0.1672	0.000868	0.1582	0.057113	FALSE	FALSE	FALSE	9	27088757	0.000292	0.00290001	bladder cancer	TRUE	9.92e-06	9	27088757	2920	0.03778	TRUE	2	1	TRUE	NA
CD28 on CD28+ CD4+	rs6557390	G	A	G	A	-0.145	0.000134	0.7538	0.678544	FALSE	FALSE	FALSE	6	155272013	0.000145	0.35	bladder cancer	TRUE	3.47e-06	6	155272013	2920	0.03118	TRUE	2	1	TRUE	NA
CD28 on CD28+ CD4+	rs6836990	T	G	T	G	0.2933	-0.000192	0.0572	0.057224	FALSE	FALSE	FALSE	4	29416600	0.000292	0.51	bladder cancer	TRUE	1.14e-06	4	29416600	2920	0.06015	TRUE	2	1	TRUE	NA
CD28 on CD28+ CD4+	rs72928038	A	G	A	G	0.2512	-9.15e-05	0.199	0.179424	FALSE	FALSE	FALSE	6	90976768	0.000176	0.6	bladder cancer	TRUE	1.84e-13	6	90976768	2920	0.03397	TRUE	2	1	TRUE	NA
CD28 on CD28+ CD4+	rs7685596	G	A	G	A	0.1263	-9.73e-05	0.3664	0.4854	FALSE	FALSE	FALSE	4	8533012	0.000137	0.48	bladder cancer	TRUE	8.42e-06	4	8533012	2920	0.02831	TRUE	2	1	TRUE	NA
CD28 on CD28+ CD4+	rs77397796	T	C	T	C	1.949	-0.000926	0.0012	0.013914	FALSE	FALSE	FALSE	5	5367152	0.000578	0.11	bladder cancer	TRUE	2.81e-07	5	5367152	2920	0.3787	TRUE	2	1	TRUE	NA
CD28 on CD28+ CD4+	rs79296624	C	A	C	A	-0.2223	0.000214	0.0978	0.108577	FALSE	FALSE	FALSE	2	203870108	0.000221	0.33	bladder cancer	TRUE	2.04e-06	2	203870108	2920	0.04671	TRUE	2	1	TRUE	NA
CD28 on CD28+ CD4+	rs9516901	C	T	C	T	0.3399	-0.000253	0.0353	0.026223	FALSE	FALSE	FALSE	13	97958649	0.000433	0.56	bladder cancer	TRUE	3.85e-06	13	97958649	2920	0.07344	TRUE	2	1	TRUE	NA
CD28 on CD28+ CD4+	rs998490	T	G	T	G	0.303	-0.000419	0.043	0.026168	FALSE	FALSE	FALSE	21	16860484	0.000427	0.33	bladder cancer	TRUE	5.76e-06	21	16860484	2920	0.06668	TRUE	2	1	TRUE	NA
CD28 on CD39+ resting Treg	rs114565907	T	G	T	G	0.7664	-0.000452	0.0074	0.011863	FALSE	FALSE	FALSE	1	177284570	0.00063	0.47	bladder cancer	TRUE	1.71e-06	1	177284570	2650	0.1598	TRUE	2	1	TRUE	NA
CD28 on CD39+ resting Treg	rs114579738	T	G	T	G	-0.2975	0.000442	0.0626	0.035587	FALSE	FALSE	FALSE	15	87662869	0.000368	0.23	bladder cancer	TRUE	9.11e-08	15	87662869	2650	0.05552	TRUE	2	1	TRUE	NA
CD28 on CD39+ resting Treg	rs115841111	G	A	G	A	-4.226	0.00109912	0.0002	0.01284	FALSE	FALSE	FALSE	1	242105339	0.0006	0.0669993	bladder cancer	TRUE	8.4e-06	1	242105339	2650	0.9469	TRUE	2	1	TRUE	NA
CD28 on CD39+ resting Treg	rs117389073	T	C	T	C	0.3459	-0.00102285	0.0319	0.014254	FALSE	FALSE	FALSE	16	634475	0.00069	0.14	bladder cancer	TRUE	7.22e-06	16	634475	2650	0.07694	TRUE	2	1	TRUE	NA
CD28 on CD39+ resting Treg	rs117653391	A	G	A	G	0.4455	-0.000116	0.0449	0.046786	FALSE	FALSE	FALSE	10	97551952	0.000321	0.719999	bladder cancer	TRUE	9.29e-12	10	97551952	2650	0.06505	TRUE	2	1	TRUE	NA
CD28 on CD39+ resting Treg	rs117957417	A	G	A	G	0.4033	-0.000392	0.0257	0.018113	FALSE	FALSE	FALSE	10	96597621	0.000515	0.450001	bladder cancer	TRUE	2.28e-06	10	96597621	2650	0.08514	TRUE	2	1	TRUE	NA
CD28 on CD39+ resting Treg	rs118122984	G	A	G	A	-2.668	0.000589	0.0006	0.025564	FALSE	FALSE	FALSE	10	122084798	0.000432	0.17	bladder cancer	TRUE	2.67e-06	10	122084798	2650	0.567	TRUE	2	1	TRUE	NA
CD28 on CD39+ resting Treg	rs12068559	C	T	C	T	-0.1602	0.000279	0.8096	0.885034	FALSE	FALSE	FALSE	1	6127983	0.000222	0.21	bladder cancer	TRUE	3.99e-06	1	6127983	2650	0.03467	TRUE	2	1	TRUE	NA
CD28 on CD39+ resting Treg	rs13404978	T	C	T	C	-0.1787	0.000218	0.1977	0.171246	FALSE	FALSE	FALSE	2	204653886	0.00018	0.23	bladder cancer	TRUE	1.87e-07	2	204653886	2650	0.0342	TRUE	2	1	TRUE	NA
CD28 on CD39+ resting Treg	rs141247369	A	G	A	G	1.078	-0.00025	0.0038	0.025245	FALSE	FALSE	FALSE	1	3272937	0.0005	0.62	bladder cancer	TRUE	9.01e-07	1	3272937	2650	0.2189	TRUE	2	1	TRUE	NA
CD28 on CD39+ resting Treg	rs17107510	T	C	T	C	-0.2152	0.000103	0.1164	0.101374	FALSE	FALSE	FALSE	12	70389055	0.000225	0.649999	bladder cancer	TRUE	6.54e-07	12	70389055	2650	0.04315	TRUE	2	1	TRUE	NA
CD28 on CD39+ resting Treg	rs182187758	G	C	G	C	0.9895	-0.000555	0.0053	0.018976	FALSE	TRUE	FALSE	13	80391747	0.000531	0.3	bladder cancer	TRUE	1.58e-07	13	80391747	2650	0.1882	TRUE	2	1	TRUE	NA
CD28 on CD39+ resting Treg	rs284615	G	A	G	A	0.136	0.000183	0.2915	0.300904	FALSE	FALSE	FALSE	10	61151603	0.000148	0.22	bladder cancer	TRUE	5.89e-06	10	61151603	2650	0.02997	TRUE	2	1	TRUE	NA
CD28 on CD39+ resting Treg	rs28921682	A	G	A	G	0.2663	0.000216	0.0649	0.046905	FALSE	FALSE	FALSE	17	11968129	0.000324	0.51	bladder cancer	TRUE	1.37e-06	17	11968129	2650	0.05502	TRUE	2	1	TRUE	NA
CD28 on CD39+ resting Treg	rs4707609	C	T	C	T	0.1619	0.00045	0.4387	0.36336	FALSE	FALSE	FALSE	6	90946479	0.00014	0.00140001	bladder cancer	TRUE	3.44e-09	6	90946479	2650	0.0273	TRUE	2	1	TRUE	NA
CD28 on CD39+ resting Treg	rs6008485	G	A	G	A	-0.2399	-3.79e-05	0.0808	0.095395	FALSE	FALSE	FALSE	22	48371416	0.00023	0.87	bladder cancer	TRUE	1.51e-06	22	48371416	2650	0.04977	TRUE	2	1	TRUE	NA
CD28 on CD39+ resting Treg	rs623219	T	C	T	C	-1.533	0.00067	0.9983	0.988532	FALSE	FALSE	FALSE	6	137512886	0.000682	0.33	bladder cancer	TRUE	2.94e-06	6	137512886	2650	0.3271	TRUE	2	1	TRUE	NA
CD28 on CD39+ resting Treg	rs78365755	C	G	C	G	0.4675	-0.000219	0.0177	0.017595	FALSE	TRUE	FALSE	6	13328984	0.000514	0.67	bladder cancer	TRUE	4.5e-06	6	13328984	2650	0.1017	TRUE	2	1	TRUE	NA
CD28 on CD39+ resting Treg	rs7846567	A	C	A	C	0.1273	-0.000131	0.5181	0.536316	FALSE	FALSE	FALSE	8	143612149	0.000136	0.33	bladder cancer	TRUE	3.35e-06	8	143612149	2650	0.02734	TRUE	2	1	TRUE	NA
CD33br HLA DR+ CD14- %CD33br HLA DR+	rs10494422	C	A	C	A	0.2421	0.000187	0.1074	0.084137	FALSE	FALSE	FALSE	1	164781015	0.000243	0.44	bladder cancer	TRUE	7.1e-06	1	164781015	1858	0.05377	TRUE	2	1	TRUE	NA
CD33br HLA DR+ CD14- %CD33br HLA DR+	rs10799466	A	G	A	G	-0.1496	-7.02e-05	0.5067	0.373624	FALSE	FALSE	FALSE	1	228317685	0.00014	0.62	bladder cancer	TRUE	9.41e-06	1	228317685	1858	0.03367	TRUE	2	1	TRUE	NA
CD33br HLA DR+ CD14- %CD33br HLA DR+	rs111695695	A	C	A	C	-0.2749	0.000506	0.0823	0.027099	FALSE	FALSE	FALSE	19	51897760	0.000476	0.29	bladder cancer	TRUE	7.57e-06	19	51897760	1858	0.06122	TRUE	2	1	TRUE	NA
CD33br HLA DR+ CD14- %CD33br HLA DR+	rs113548770	G	A	G	A	-1.707	-0.000743	0.0019	0.011919	FALSE	FALSE	FALSE	18	70222212	0.000668	0.27	bladder cancer	TRUE	3.02e-06	18	70222212	1858	0.3645	TRUE	2	1	TRUE	NA
CD33br HLA DR+ CD14- %CD33br HLA DR+	rs115205981	A	G	A	G	-0.2317	8.85e-05	0.1243	0.042849	FALSE	FALSE	FALSE	4	36025181	0.000337	0.79	bladder cancer	TRUE	5.2e-06	4	36025181	1858	0.05069	TRUE	2	1	TRUE	NA
CD33br HLA DR+ CD14- %CD33br HLA DR+	rs116534482	C	T	C	T	0.4192	-0.00057	0.0342	0.015825	FALSE	FALSE	FALSE	2	142334140	0.000554	0.3	bladder cancer	TRUE	3.58e-06	2	142334140	1858	0.09019	TRUE	2	1	TRUE	NA
CD33br HLA DR+ CD14- %CD33br HLA DR+	rs11982860	A	G	A	G	0.1825	0.00011	0.2096	0.209961	FALSE	FALSE	FALSE	7	67501241	0.000165	0.51	bladder cancer	TRUE	9.16e-06	7	67501241	1858	0.04102	TRUE	2	1	TRUE	NA
CD33br HLA DR+ CD14- %CD33br HLA DR+	rs12033128	C	T	C	T	-0.262	-0.000186	0.1389	0.091883	FALSE	FALSE	FALSE	1	85552939	0.000235	0.43	bladder cancer	TRUE	5.4e-08	1	85552939	1858	0.04799	TRUE	2	1	TRUE	NA
CD33br HLA DR+ CD14- %CD33br HLA DR+	rs142412842	C	A	C	A	-1.297	-0.00076	0.004	0.019399	FALSE	FALSE	FALSE	7	140274216	0.000502	0.13	bladder cancer	TRUE	5.71e-06	7	140274216	1858	0.2851	TRUE	2	1	TRUE	NA
CD33br HLA DR+ CD14- %CD33br HLA DR+	rs16865573	C	T	C	T	-0.196	0.000114	0.2199	0.152485	FALSE	FALSE	FALSE	2	6895049	0.000188	0.54	bladder cancer	TRUE	2.32e-06	2	6895049	1858	0.04137	TRUE	2	1	TRUE	NA
CD33br HLA DR+ CD14- %CD33br HLA DR+	rs218773	G	A	G	A	0.3392	0.000164	0.937	0.877152	FALSE	FALSE	FALSE	4	14437080	0.000206	0.43	bladder cancer	TRUE	9.57e-07	4	14437080	1858	0.06898	TRUE	2	1	TRUE	NA
CD33br HLA DR+ CD14- %CD33br HLA DR+	rs2501720	A	G	A	G	0.1697	-0.000154	0.267	0.287417	FALSE	FALSE	FALSE	6	90899561	0.00015	0.3	bladder cancer	TRUE	5.75e-06	6	90899561	1858	0.0373	TRUE	2	1	TRUE	NA
CD33br HLA DR+ CD14- %CD33br HLA DR+	rs2529690	A	G	A	G	0.2193	-0.000168	0.1747	0.226189	FALSE	FALSE	FALSE	17	12239004	0.000166	0.31	bladder cancer	TRUE	6.02e-07	17	12239004	1858	0.0438	TRUE	2	1	TRUE	NA
CD33br HLA DR+ CD14- %CD33br HLA DR+	rs62197298	T	C	T	C	-0.2378	0.000225	0.1173	0.111832	FALSE	FALSE	FALSE	20	61646108	0.000218	0.3	bladder cancer	TRUE	4.02e-06	20	61646108	1858	0.05142	TRUE	2	1	TRUE	NA
CD33br HLA DR+ CD14- %CD33br HLA DR+	rs62350505	G	C	G	C	1.103	0.00056	0.0054	0.058629	FALSE	TRUE	FALSE	4	165304812	0.000307	0.0680002	bladder cancer	TRUE	3.14e-06	4	165304812	1858	0.236	TRUE	2	1	TRUE	NA
CD33br HLA DR+ CD14- %CD33br HLA DR+	rs6844114	A	G	A	G	-0.4891	-0.000141	0.0269	0.088519	FALSE	FALSE	FALSE	4	190745892	0.000241	0.56	bladder cancer	TRUE	2.83e-06	4	190745892	1858	0.1041	TRUE	2	1	TRUE	NA
CD33br HLA DR+ CD14- %CD33br HLA DR+	rs7116432	G	A	G	A	-0.1819	0.00011	0.2333	0.341368	FALSE	FALSE	FALSE	11	35244058	0.000143	0.44	bladder cancer	TRUE	4.43e-06	11	35244058	1858	0.03952	TRUE	2	1	TRUE	NA
CD33br HLA DR+ CD14- %CD33br HLA DR+	rs7245846	A	G	A	G	-0.3128	-0.000293	0.2236	0.354169	FALSE	FALSE	FALSE	19	51731176	0.000142	0.0389996	bladder cancer	TRUE	2.63e-15	19	51731176	1858	0.03922	TRUE	2	1	TRUE	NA
CD38 on IgD+ CD24-	rs11042077	A	G	A	G	0.1233	-0.000197	0.4943	0.64935	FALSE	FALSE	FALSE	11	8825966	0.000142	0.17	bladder cancer	TRUE	1.09e-06	11	8825966	3656	0.02525	TRUE	2	1	TRUE	NA
CD38 on IgD+ CD24-	rs115062208	G	A	G	A	-0.6992	-0.000576	0.0115	0.018797	FALSE	FALSE	FALSE	4	15956227	0.000509	0.26	bladder cancer	TRUE	7.97e-09	4	15956227	3656	0.1209	TRUE	2	1	TRUE	NA
CD38 on IgD+ CD24-	rs12032479	T	C	T	C	-0.1554	7.02e-06	0.1797	0.245358	FALSE	FALSE	FALSE	1	194997589	0.000158	0.96	bladder cancer	TRUE	2.27e-06	1	194997589	3656	0.03281	TRUE	2	1	TRUE	NA
CD38 on IgD+ CD24-	rs17179337	G	A	G	A	0.1195	-2.88e-06	0.4724	0.44069	FALSE	FALSE	FALSE	14	38174359	0.000136	0.98	bladder cancer	TRUE	2.45e-06	14	38174359	3656	0.02533	TRUE	2	1	TRUE	NA
CD38 on IgD+ CD24-	rs1878808	T	C	T	C	-0.1139	-0.000125	0.4721	0.55199	FALSE	FALSE	FALSE	7	3020375	0.000136	0.36	bladder cancer	TRUE	4.21e-06	7	3020375	3656	0.02471	TRUE	2	1	TRUE	NA
CD38 on IgD+ CD24-	rs2516708	A	G	A	G	0.1331	0.000117	0.5252	0.391207	FALSE	FALSE	FALSE	6	30228721	0.000139	0.4	bladder cancer	TRUE	1.05e-06	6	30228721	3656	0.02723	TRUE	2	1	TRUE	NA
CD38 on IgD+ CD24-	rs28393044	G	C	G	C	0.3099	-0.000115	0.0334	0.106604	FALSE	TRUE	FALSE	4	157437839	0.000219	0.6	bladder cancer	TRUE	8.99e-06	4	157437839	3656	0.0697	TRUE	2	1	TRUE	NA
CD38 on IgD+ CD24-	rs572542	T	C	T	C	-0.3492	-0.000337	0.0289	0.026388	FALSE	FALSE	FALSE	4	14029370	0.000421	0.42	bladder cancer	TRUE	1.89e-06	4	14029370	3656	0.07317	TRUE	2	1	TRUE	NA
CD38 on IgD+ CD24-	rs6895789	T	C	T	C	-0.1644	-0.000169	0.1533	0.117068	FALSE	FALSE	FALSE	5	91363908	0.000213	0.43	bladder cancer	TRUE	2.6e-06	5	91363908	3656	0.03492	TRUE	2	1	TRUE	NA
CD38 on IgD+ CD24-	rs72715691	T	A	T	A	-0.4872	-0.000923	0.0131	0.040585	FALSE	TRUE	FALSE	9	15034791	0.000375	0.0140001	bladder cancer	TRUE	7.54e-06	9	15034791	3656	0.1087	TRUE	2	1	TRUE	NA
CD38 on IgD+ CD24-	rs76112278	A	G	A	G	-0.7826	-0.00044	0.0194	0.015532	FALSE	FALSE	FALSE	4	15915069	0.000577	0.450001	bladder cancer	TRUE	4.58e-18	4	15915069	3656	0.08987	TRUE	2	1	TRUE	NA
CD38 on IgD+ CD24-	rs76354299	A	G	A	G	-0.3606	-3.99e-06	0.0321	0.036664	FALSE	FALSE	FALSE	4	15037408	0.000367	0.99	bladder cancer	TRUE	2.48e-07	4	15037408	3656	0.06977	TRUE	2	1	TRUE	NA
CD38 on IgD+ CD24-	rs78111008	C	T	C	T	-0.7342	-0.00084	0.0063	0.027482	FALSE	FALSE	FALSE	20	12142943	0.000417	0.0439997	bladder cancer	TRUE	6.35e-06	20	12142943	3656	0.1624	TRUE	2	1	TRUE	NA
CD38 on IgD+ CD24-	rs79300919	A	G	A	G	0.3949	-0.000248	0.0211	0.056871	FALSE	FALSE	FALSE	3	14288322	0.000292	0.4	bladder cancer	TRUE	7.1e-06	3	14288322	3656	0.08781	TRUE	2	1	TRUE	NA
CD38 on IgD+ CD24-	rs9599916	G	A	G	A	0.1395	0.00011	0.2291	0.283189	FALSE	FALSE	FALSE	13	72594895	0.000151	0.46	bladder cancer	TRUE	2.83e-06	13	72594895	3656	0.02975	TRUE	2	1	TRUE	NA
CD4/CD8br	rs10990269	T	C	T	C	-0.117	-0.000143	0.3527	0.357514	FALSE	FALSE	FALSE	9	99054924	0.000142	0.31	bladder cancer	TRUE	7.98e-06	9	99054924	3652	0.02616	TRUE	2	1	TRUE	NA
CD4/CD8br	rs11080350	T	C	T	C	0.1148	-3.25e-05	0.4018	0.285879	FALSE	FALSE	FALSE	17	33774635	0.00015	0.83	bladder cancer	TRUE	7.37e-06	17	33774635	3652	0.02558	TRUE	2	1	TRUE	NA
CD4/CD8br	rs11120194	C	T	C	T	-0.1735	-9.78e-06	0.1113	0.10258	FALSE	FALSE	FALSE	1	213863315	0.000224	0.97	bladder cancer	TRUE	9.07e-06	1	213863315	3652	0.03904	TRUE	2	1	TRUE	NA
CD4/CD8br	rs117942997	G	C	G	C	0.4504	0.000289	0.0189	0.024525	FALSE	TRUE	FALSE	10	74476968	0.000437	0.51	bladder cancer	TRUE	7.37e-06	10	74476968	3652	0.1003	TRUE	2	1	TRUE	NA
CD4/CD8br	rs12139740	T	C	T	C	0.1564	0.000106	0.1465	0.261375	FALSE	FALSE	FALSE	1	242332976	0.000155	0.5	bladder cancer	TRUE	7.83e-06	1	242332976	3652	0.03494	TRUE	2	1	TRUE	NA
CD4/CD8br	rs13418326	G	C	G	C	-0.1442	-0.000272	0.2063	0.329737	FALSE	TRUE	FALSE	2	113732809	0.000144	0.0589997	bladder cancer	TRUE	3.48e-06	2	113732809	3652	0.03102	TRUE	2	1	TRUE	NA
CD4/CD8br	rs141317121	A	G	A	G	-0.2075	-0.000205	0.0772	0.060337	FALSE	FALSE	FALSE	1	19649970	0.000289	0.48	bladder cancer	TRUE	7.34e-06	1	19649970	3652	0.04621	TRUE	2	1	TRUE	NA
CD4/CD8br	rs1529247	A	T	A	T	0.4252	0.000307	0.983	0.956745	FALSE	TRUE	FALSE	7	9337459	0.000336	0.36	bladder cancer	TRUE	7.64e-06	7	9337459	3652	0.09488	TRUE	2	1	TRUE	NA
CD4/CD8br	rs2516466	G	T	G	T	-0.1347	-0.000116	0.3758	0.551065	FALSE	FALSE	FALSE	6	31414327	0.000136	0.4	bladder cancer	TRUE	7.1e-06	6	31414327	3652	0.02995	TRUE	2	1	TRUE	NA
CD4/CD8br	rs495055	G	A	G	A	0.3049	0.000675	0.0357	0.03421	FALSE	FALSE	FALSE	17	74440890	0.000372	0.0700003	bladder cancer	TRUE	3.1e-06	17	74440890	3652	0.06527	TRUE	2	1	TRUE	NA
CD4/CD8br	rs62130076	A	G	A	G	-0.121	-0.000201	0.3472	0.277612	FALSE	FALSE	FALSE	19	1671549	0.000151	0.18	bladder cancer	TRUE	3.26e-06	19	1671549	3652	0.02596	TRUE	2	1	TRUE	NA
CD4/CD8br	rs73402222	C	T	C	T	0.1905	0.000413	0.3456	0.058481	FALSE	FALSE	FALSE	6	31388449	0.000287	0.15	bladder cancer	TRUE	2.39e-08	6	31388449	3652	0.03406	TRUE	2	1	TRUE	NA
CD4/CD8br	rs74493069	A	G	A	G	0.8545	0.000371	0.0041	0.037383	FALSE	FALSE	FALSE	7	138725017	0.000356	0.3	bladder cancer	TRUE	4.36e-06	7	138725017	3652	0.1858	TRUE	2	1	TRUE	NA
CD4/CD8br	rs798726	C	T	C	T	-0.1395	-0.000412	0.7809	0.81011	FALSE	FALSE	FALSE	4	1685211	0.000173	0.017	bladder cancer	TRUE	3.56e-06	4	1685211	3652	0.03005	TRUE	2	1	TRUE	NA
CD62L- HLA DR++ monocyte AC	rs10759491	T	C	T	C	-0.1197	0.000204	0.4032	0.402188	FALSE	FALSE	FALSE	9	113852341	0.000138	0.14	bladder cancer	TRUE	8.75e-06	9	113852341	3018	0.02688	TRUE	2	1	TRUE	NA
CD62L- HLA DR++ monocyte AC	rs10887149	A	G	A	G	0.1276	4.29e-05	0.3101	0.339498	FALSE	FALSE	FALSE	10	124167004	0.000143	0.760001	bladder cancer	TRUE	8.36e-06	10	124167004	3018	0.02858	TRUE	2	1	TRUE	NA
CD62L- HLA DR++ monocyte AC	rs10948829	G	A	G	A	-0.2094	0.00088	0.0911	0.063985	FALSE	FALSE	FALSE	6	54476928	0.000278	0.0015	bladder cancer	TRUE	6.35e-06	6	54476928	3018	0.0463	TRUE	2	1	TRUE	NA
CD62L- HLA DR++ monocyte AC	rs10980077	A	G	A	G	-0.1284	9.6e-05	0.3118	0.348691	FALSE	FALSE	FALSE	9	112600304	0.000148	0.52	bladder cancer	TRUE	5.9e-06	9	112600304	3018	0.0283	TRUE	2	1	TRUE	NA
CD62L- HLA DR++ monocyte AC	rs111224423	G	C	G	C	-0.2927	0.000199	0.0409	0.059776	FALSE	TRUE	FALSE	4	1531162	0.000286	0.49	bladder cancer	TRUE	8.98e-06	4	1531162	3018	0.06581	TRUE	2	1	TRUE	NA
CD62L- HLA DR++ monocyte AC	rs115431394	C	A	C	A	0.5986	-7.01e-05	0.0096	0.026598	FALSE	FALSE	FALSE	3	1641354	0.000424	0.87	bladder cancer	TRUE	8.27e-06	3	1641354	3018	0.134	TRUE	2	1	TRUE	NA
CD62L- HLA DR++ monocyte AC	rs117545845	T	C	T	C	0.1995	-0.000212629	0.1209	0.106098	FALSE	FALSE	FALSE	22	25622885	0.000228	0.35	bladder cancer	TRUE	5.05e-07	22	25622885	3018	0.03962	TRUE	2	1	TRUE	NA
CD62L- HLA DR++ monocyte AC	rs1320172	T	C	T	C	0.1401	-9.51e-05	0.2179	0.370503	FALSE	FALSE	FALSE	3	61569753	0.000142	0.5	bladder cancer	TRUE	9.92e-06	3	61569753	3018	0.03165	TRUE	2	1	TRUE	NA
CD62L- HLA DR++ monocyte AC	rs139554006	A	G	A	G	0.3934	-0.000282	0.0255	0.011218	FALSE	FALSE	FALSE	14	53831558	0.00065	0.66	bladder cancer	TRUE	2.17e-06	14	53831558	3018	0.08287	TRUE	2	1	TRUE	NA
CD62L- HLA DR++ monocyte AC	rs144348353	T	G	T	G	0.3569	-0.000832	0.0295	0.013161	FALSE	FALSE	FALSE	15	88341038	0.000609	0.17	bladder cancer	TRUE	6.31e-06	15	88341038	3018	0.07891	TRUE	2	1	TRUE	NA
CD62L- HLA DR++ monocyte AC	rs148420500	A	G	A	G	-0.4212	-0.000153	0.0209	0.03504	FALSE	FALSE	FALSE	13	76034172	0.000372	0.68	bladder cancer	TRUE	2.86e-06	13	76034172	3018	0.08981	TRUE	2	1	TRUE	NA
CD62L- HLA DR++ monocyte AC	rs28680389	A	G	A	G	0.2396	-0.000276	0.0747	0.078224	FALSE	FALSE	FALSE	11	134566275	0.000254	0.28	bladder cancer	TRUE	1.47e-06	11	134566275	3018	0.04966	TRUE	2	1	TRUE	NA
CD62L- HLA DR++ monocyte AC	rs3797612	C	T	C	T	0.1137	2.46e-05	0.4606	0.484617	FALSE	FALSE	FALSE	5	178631699	0.000135	0.86	bladder cancer	TRUE	9.53e-06	5	178631699	3018	0.02564	TRUE	2	1	TRUE	NA
CD62L- HLA DR++ monocyte AC	rs4899265	C	A	C	A	0.1267	-0.000105	0.3474	0.285828	FALSE	FALSE	FALSE	14	69321561	0.000154	0.49	bladder cancer	TRUE	4.53e-06	14	69321561	3018	0.02759	TRUE	2	1	TRUE	NA
CD62L- HLA DR++ monocyte AC	rs7190107	A	T	A	T	-0.1416	2.27e-05	0.2169	0.109235	FALSE	TRUE	FALSE	16	50273295	0.000218	0.92	bladder cancer	TRUE	7.06e-06	16	50273295	3018	0.03148	TRUE	2	1	TRUE	NA
CD62L- HLA DR++ monocyte AC	rs7437802	T	C	T	C	-0.1209	-2.5e-05	0.6269	0.595313	FALSE	FALSE	FALSE	4	148180897	0.000138	0.86	bladder cancer	TRUE	8.65e-06	4	148180897	3018	0.02713	TRUE	2	1	TRUE	NA
CD62L- HLA DR++ monocyte AC	rs74805957	T	C	T	C	0.3042	0.000299	0.0396	0.022517	FALSE	FALSE	FALSE	2	112941273	0.000462	0.52	bladder cancer	TRUE	5.91e-06	2	112941273	3018	0.06703	TRUE	2	1	TRUE	NA
CD62L- HLA DR++ monocyte AC	rs938447	C	T	C	T	0.1364	-0.000263	0.6473	0.700337	FALSE	FALSE	FALSE	12	108746427	0.000148	0.0749998	bladder cancer	TRUE	6.94e-07	12	108746427	3018	0.02743	TRUE	2	1	TRUE	NA
CD62L- monocyte AC	rs11249570	A	G	A	G	-0.1525	0.00015	0.4581	0.413455	FALSE	FALSE	FALSE	5	177033794	0.000138	0.28	bladder cancer	TRUE	7.66e-09	5	177033794	3019	0.02632	TRUE	2	1	TRUE	NA
CD62L- monocyte AC	rs116691483	A	G	A	G	0.3974	-0.000569	0.0235	0.013152	FALSE	FALSE	FALSE	11	111990120	0.000662	0.39	bladder cancer	TRUE	9.33e-06	11	111990120	3019	0.0895	TRUE	2	1	TRUE	NA
CD62L- monocyte AC	rs11935230	C	G	C	G	0.1842	2.16e-05	0.1686	0.257296	FALSE	TRUE	FALSE	4	136447876	0.000156	0.89	bladder cancer	TRUE	3.5e-07	4	136447876	3019	0.03607	TRUE	2	1	TRUE	NA
CD62L- monocyte AC	rs13068785	T	C	T	C	0.269	-9.67e-06	0.0581	0.037115	FALSE	FALSE	FALSE	3	74703663	0.000363	0.98	bladder cancer	TRUE	4.62e-06	3	74703663	3019	0.05861	TRUE	2	1	TRUE	NA
CD62L- monocyte AC	rs149543954	T	G	T	G	0.295	-0.000324	0.0517	0.042651	FALSE	FALSE	FALSE	20	15302488	0.000350904	0.36	bladder cancer	TRUE	1.43e-06	20	15302488	3019	0.06108	TRUE	2	1	TRUE	NA
CD62L- monocyte AC	rs17082777	A	G	A	G	-0.2033	1.59e-05	0.1014	0.146701	FALSE	FALSE	FALSE	4	63361327	0.000192	0.93	bladder cancer	TRUE	6.96e-06	4	63361327	3019	0.04515	TRUE	2	1	TRUE	NA
CD62L- monocyte AC	rs1800973	A	C	A	C	0.222	-0.000231	0.083	0.061338	FALSE	FALSE	FALSE	12	69744014	0.000282	0.41	bladder cancer	TRUE	5.12e-06	12	69744014	3019	0.04861	TRUE	2	1	TRUE	NA
CD62L- monocyte AC	rs1907980	T	G	T	G	0.1274	2.31e-05	0.3596	0.271184	FALSE	FALSE	FALSE	4	4859590	0.000152	0.88	bladder cancer	TRUE	5.45e-06	4	4859590	3019	0.02798	TRUE	2	1	TRUE	NA
CD62L- monocyte AC	rs278949	A	G	A	G	0.1235	-0.000344	0.5561	0.636696	FALSE	FALSE	FALSE	4	40461712	0.00014	0.0140001	bladder cancer	TRUE	6.87e-06	4	40461712	3019	0.02741	TRUE	2	1	TRUE	NA
CD62L- monocyte AC	rs435806	C	T	C	T	-0.1417	2e-05	0.2448	0.268965	FALSE	FALSE	FALSE	19	2993427	0.000166	0.9	bladder cancer	TRUE	6.08e-06	19	2993427	3019	0.03127	TRUE	2	1	TRUE	NA
CD62L- monocyte AC	rs4484736	A	G	A	G	-0.1386	-0.000148	0.7173	0.78565	FALSE	FALSE	FALSE	8	66059237	0.000165	0.37	bladder cancer	TRUE	4.37e-06	8	66059237	3019	0.03012	TRUE	2	1	TRUE	NA
CD62L- monocyte AC	rs4899265	C	A	C	A	0.139	-0.000105	0.3475	0.285828	FALSE	FALSE	FALSE	14	69321561	0.000154	0.49	bladder cancer	TRUE	1.21e-06	14	69321561	3019	0.02858	TRUE	2	1	TRUE	NA
CD62L- monocyte AC	rs4987369	T	G	T	G	0.2378	-0.00021	0.2774	0.323589	FALSE	FALSE	FALSE	1	169662742	0.000145	0.15	bladder cancer	TRUE	3.61e-15	1	169662742	3019	0.03006	TRUE	2	1	TRUE	NA
CD62L- monocyte AC	rs528135834	G	T	G	T	0.859	-0.00110958	0.0056	0.014976	FALSE	FALSE	FALSE	7	41362245	0.000565	0.0490004	bladder cancer	TRUE	2.75e-06	7	41362245	3019	0.1829	TRUE	2	1	TRUE	NA
CD62L- monocyte AC	rs530377	C	T	C	T	0.1627	-0.000417	0.2211	0.304905	FALSE	FALSE	FALSE	9	135337621	0.000147	0.00449997	bladder cancer	TRUE	6.13e-07	9	135337621	3019	0.03256	TRUE	2	1	TRUE	NA
CD62L- monocyte AC	rs62167331	A	G	A	G	-0.347	-1.42e-05	0.0341	0.08211	FALSE	FALSE	FALSE	2	56524393	0.000251	0.95	bladder cancer	TRUE	3.48e-06	2	56524393	3019	0.07464	TRUE	2	1	TRUE	NA
CD62L- monocyte AC	rs77287889	A	G	A	G	0.352	0.000279	0.0301	0.023924	FALSE	FALSE	FALSE	10	89954638	0.000446	0.53	bladder cancer	TRUE	9.3e-06	10	89954638	3019	0.07927	TRUE	2	1	TRUE	NA
CD8br %T cell	rs10990269	T	C	T	C	0.1232	-0.000143	0.3525	0.357514	FALSE	FALSE	FALSE	9	99054924	0.000142	0.31	bladder cancer	TRUE	1.91e-06	9	99054924	3668	0.02583	TRUE	2	1	TRUE	NA
CD8br %T cell	rs117942997	G	C	G	C	-0.4398	0.000289	0.0189	0.024525	FALSE	TRUE	FALSE	10	74476968	0.000437	0.51	bladder cancer	TRUE	9.19e-06	10	74476968	3668	0.09901	TRUE	2	1	TRUE	NA
CD8br %T cell	rs12139740	T	C	T	C	-0.1603	0.000106	0.1465	0.261375	FALSE	FALSE	FALSE	1	242332976	0.000155	0.5	bladder cancer	TRUE	3.59e-06	1	242332976	3668	0.03454	TRUE	2	1	TRUE	NA
CD8br %T cell	rs12449027	A	G	A	G	-0.1374	-7.11e-05	0.1884	0.115067	FALSE	FALSE	FALSE	16	13172942	0.000213	0.74	bladder cancer	TRUE	8.02e-06	16	13172942	3668	0.03073	TRUE	2	1	TRUE	NA
CD8br %T cell	rs13418326	G	C	G	C	0.1508	-0.000272	0.2058	0.329737	FALSE	TRUE	FALSE	2	113732809	0.000144	0.0589997	bladder cancer	TRUE	8.24e-07	2	113732809	3668	0.03053	TRUE	2	1	TRUE	NA
CD8br %T cell	rs141317121	A	G	A	G	0.2079	-0.000205	0.077	0.060337	FALSE	FALSE	FALSE	1	19649970	0.000289	0.48	bladder cancer	TRUE	5.63e-06	1	19649970	3668	0.04572	TRUE	2	1	TRUE	NA
CD8br %T cell	rs1676877	G	A	G	A	0.1876	0.000123	0.8993	0.782447	FALSE	FALSE	FALSE	11	74879130	0.000165	0.46	bladder cancer	TRUE	3.33e-06	11	74879130	3668	0.04029	TRUE	2	1	TRUE	NA
CD8br %T cell	rs2337390	G	A	G	A	0.135	0.000123	0.7927	0.718013	FALSE	FALSE	FALSE	5	71408867	0.00015	0.41	bladder cancer	TRUE	5.74e-06	5	71408867	3668	0.02972	TRUE	2	1	TRUE	NA
CD8br %T cell	rs2516466	G	T	G	T	0.1401	-0.000116	0.3762	0.551065	FALSE	FALSE	FALSE	6	31414327	0.000136	0.4	bladder cancer	TRUE	1.26e-06	6	31414327	3668	0.02887	TRUE	2	1	TRUE	NA
CD8br %T cell	rs495055	G	A	G	A	-0.2968	0.000675	0.0357	0.03421	FALSE	FALSE	FALSE	17	74440890	0.000372	0.0700003	bladder cancer	TRUE	4.24e-06	17	74440890	3668	0.06444	TRUE	2	1	TRUE	NA
CD8br %T cell	rs62130076	A	G	A	G	0.1233	-0.000201	0.3472	0.277612	FALSE	FALSE	FALSE	19	1671549	0.000151	0.18	bladder cancer	TRUE	1.61e-06	19	1671549	3668	0.02565	TRUE	2	1	TRUE	NA
CD8br %T cell	rs62458311	A	G	A	G	0.2698	4.73e-05	0.0447	0.072213	FALSE	FALSE	FALSE	7	67315960	0.000262	0.86	bladder cancer	TRUE	5.47e-06	7	67315960	3668	0.05927	TRUE	2	1	TRUE	NA
CD8br %T cell	rs73402222	C	T	C	T	-0.1934	0.000413	0.3458	0.058481	FALSE	FALSE	FALSE	6	31388449	0.000287	0.15	bladder cancer	TRUE	2.76e-09	6	31388449	3668	0.03245	TRUE	2	1	TRUE	NA
CD8br %T cell	rs73516994	T	C	T	C	-0.2993	-0.00065	0.0348	0.052808	FALSE	FALSE	FALSE	19	16748884	0.000309	0.0359998	bladder cancer	TRUE	7.81e-06	19	16748884	3668	0.06686	TRUE	2	1	TRUE	NA
CD8br %T cell	rs74493069	A	G	A	G	-0.8197	0.000371	0.0041	0.037383	FALSE	FALSE	FALSE	7	138725017	0.000356	0.3	bladder cancer	TRUE	9.44e-06	7	138725017	3668	0.1848	TRUE	2	1	TRUE	NA
CD8br %T cell	rs76595423	G	T	G	T	0.9785	-0.000369	0.0037	0.043591	FALSE	FALSE	FALSE	1	102745011	0.000346	0.29	bladder cancer	TRUE	4.24e-06	1	102745011	3668	0.2124	TRUE	2	1	TRUE	NA
CD8br %T cell	rs7670980	T	G	T	G	-0.2001	-4.32e-05	0.0841	0.127086	FALSE	FALSE	FALSE	4	41910384	0.000204	0.83	bladder cancer	TRUE	7.71e-06	4	41910384	3668	0.04467	TRUE	2	1	TRUE	NA
CD8br %T cell	rs7826289	T	C	T	C	-0.3983	0.000113	0.0188	0.037758	FALSE	FALSE	FALSE	8	61782205	0.000355	0.75	bladder cancer	TRUE	8.91e-06	8	61782205	3668	0.08953	TRUE	2	1	TRUE	NA
CD8br %T cell	rs798726	C	T	C	T	0.135	-0.000412	0.7814	0.81011	FALSE	FALSE	FALSE	4	1685211	0.000173	0.017	bladder cancer	TRUE	5.76e-06	4	1685211	3668	0.02972	TRUE	2	1	TRUE	NA
CM CD4+ AC	rs10206629	C	T	C	T	0.1343	4.42e-05	0.2443	0.189352	FALSE	FALSE	FALSE	2	38920333	0.000175	0.8	bladder cancer	TRUE	5.73e-06	2	38920333	3395	0.02955	TRUE	2	1	TRUE	NA
CM CD4+ AC	rs1043118	A	G	A	G	0.3231	0.000688	0.0376	0.011745	FALSE	FALSE	FALSE	20	56225969	0.000625	0.27	bladder cancer	TRUE	1.18e-06	20	56223607	3395	0.06637	TRUE	2	1	TRUE	NA
CM CD4+ AC	rs11062774	G	A	G	A	0.1592	3.74e-05	0.1558	0.137055	FALSE	FALSE	FALSE	12	3833312	0.000197	0.85	bladder cancer	TRUE	4.98e-06	12	3830558	3395	0.03482	TRUE	2	1	TRUE	NA
CM CD4+ AC	rs117066544	A	G	A	G	-0.2959	-0.000551	0.0387	0.019016	FALSE	FALSE	FALSE	17	7887429	0.000499	0.27	bladder cancer	TRUE	9.04e-06	17	7887429	3395	0.06656	TRUE	2	1	TRUE	NA
CM CD4+ AC	rs11725186	A	T	A	T	0.3714	0.000405	0.0233	0.017596	FALSE	TRUE	FALSE	4	94012466	0.000514	0.43	bladder cancer	TRUE	7.74e-06	4	94012466	3395	0.08292	TRUE	2	1	TRUE	NA
CM CD4+ AC	rs118048878	A	G	A	G	-0.2997	0.000254	0.0368	0.028282	FALSE	FALSE	FALSE	9	27446846	0.000445	0.57	bladder cancer	TRUE	8.59e-06	9	27446846	3395	0.06724	TRUE	2	1	TRUE	NA
CM CD4+ AC	rs11990065	G	A	G	A	0.2507	0.000883	0.0539	0.020641	FALSE	FALSE	FALSE	8	17277790	0.000478	0.0649995	bladder cancer	TRUE	8.64e-06	8	17277790	3395	0.05627	TRUE	2	1	TRUE	NA
CM CD4+ AC	rs12043060	T	C	T	C	0.1224	7.31e-05	0.4633	0.394821	FALSE	FALSE	FALSE	1	157061973	0.000139	0.6	bladder cancer	TRUE	1.65e-06	1	157059350	3395	0.0255	TRUE	2	1	TRUE	NA
CM CD4+ AC	rs144079997	T	C	T	C	0.1872	0.000479	0.1081	0.050768	FALSE	FALSE	FALSE	17	72909337	0.000314	0.13	bladder cancer	TRUE	4.09e-06	17	72909337	3395	0.04058	TRUE	2	1	TRUE	NA
CM CD4+ AC	rs151245760	C	T	C	T	0.4832	0.000565	0.0206	0.014107	FALSE	FALSE	FALSE	12	16811638	0.000592	0.34	bladder cancer	TRUE	7.65e-08	12	16811638	3395	0.08969	TRUE	2	1	TRUE	NA
CM CD4+ AC	rs17584809	T	C	T	C	0.4463	-0.000477	0.0169	0.03005	FALSE	FALSE	FALSE	21	33131559	0.000409	0.24	bladder cancer	TRUE	6.42e-06	21	33131559	3395	0.09875	TRUE	2	1	TRUE	NA
CM CD4+ AC	rs17717645	C	T	C	T	0.4171	0.000341	0.0267	0.017496	FALSE	FALSE	FALSE	7	18003774	0.000515	0.51	bladder cancer	TRUE	1.87e-07	7	18003774	3395	0.07987	TRUE	2	1	TRUE	NA
CM CD4+ AC	rs183058497	C	G	C	G	0.6116	-0.00041	0.0091	0.018931	FALSE	TRUE	FALSE	12	65373483	0.000517	0.43	bladder cancer	TRUE	2.87e-06	12	65373483	3395	0.1305	TRUE	2	1	TRUE	NA
CM CD4+ AC	rs1980708	C	T	C	T	-0.1525	-0.000198	0.8293	0.72885	FALSE	FALSE	FALSE	13	100586353	0.000152	0.19	bladder cancer	TRUE	8.03e-06	13	100586353	3395	0.0341	TRUE	2	1	TRUE	NA
CM CD4+ AC	rs2875222	A	G	A	G	-0.1204	-5.44e-05	0.5577	0.399757	FALSE	FALSE	FALSE	3	75433850	0.00016	0.73	bladder cancer	TRUE	9.06e-06	3	75433850	3395	0.02708	TRUE	2	1	TRUE	NA
CM CD4+ AC	rs3184504	C	T	C	T	-0.1609	-0.000303	0.5292	0.516305	FALSE	FALSE	FALSE	12	111884608	0.000135	0.025	bladder cancer	TRUE	2.98e-09	12	111884608	3395	0.02705	TRUE	2	1	TRUE	NA
CM CD4+ AC	rs34327811	C	T	C	T	-0.2038	0.000119	0.0887	0.040176	FALSE	FALSE	FALSE	6	148552958	0.000344	0.73	bladder cancer	TRUE	4.42e-06	6	148552958	3395	0.04433	TRUE	2	1	TRUE	NA
CM CD4+ AC	rs541367304	A	G	A	G	-1.329	4.45e-05	0.0032	0.020182	FALSE	FALSE	FALSE	1	198283058	0.000525	0.93	bladder cancer	TRUE	3.83e-07	1	198283058	3395	0.2612	TRUE	2	1	TRUE	NA
CM CD4+ AC	rs55873755	T	C	T	C	-0.4084	-0.000347	0.0209	0.037575	FALSE	FALSE	FALSE	12	26948822	0.000357	0.33	bladder cancer	TRUE	3.84e-06	12	26948822	3395	0.08826	TRUE	2	1	TRUE	NA
CM CD4+ AC	rs61148192	G	A	G	A	-0.2251	-0.00018	0.0645	0.038691	FALSE	FALSE	FALSE	20	10891892	0.000352	0.61	bladder cancer	TRUE	8.44e-06	20	10891892	3395	0.05047	TRUE	2	1	TRUE	NA
CM CD4+ AC	rs7162344	A	G	A	G	-0.1159	-0.000196	0.4315	0.35065	FALSE	FALSE	FALSE	15	26030485	0.000145	0.17	bladder cancer	TRUE	4.48e-06	15	26030485	3395	0.02523	TRUE	2	1	TRUE	NA
CM CD4+ AC	rs75024452	T	A	T	A	0.2519	0.00012	0.0617	0.081461	FALSE	TRUE	FALSE	6	7780498	0.00025	0.630001	bladder cancer	TRUE	1.87e-06	6	7780498	3395	0.05276	TRUE	2	1	TRUE	NA
CM CD4+ AC	rs76664097	A	G	A	G	-0.6098	-0.000169	0.0115	0.043476	FALSE	FALSE	FALSE	5	178428451	0.000331	0.61	bladder cancer	TRUE	1.07e-07	5	178428451	3395	0.1145	TRUE	2	1	TRUE	NA
CM CD4+ AC	rs7760353	A	T	A	T	0.2327	0.000266	0.0663	0.097606	FALSE	TRUE	FALSE	6	102207604	0.000229	0.25	bladder cancer	TRUE	5.77e-06	6	102207604	3395	0.05124	TRUE	2	1	TRUE	NA
CM CD4+ AC	rs78720100	T	C	T	C	0.2554	8.97e-06	0.0495	0.052291	FALSE	FALSE	FALSE	15	97948444	0.000305	0.98	bladder cancer	TRUE	6.84e-06	15	97948444	3395	0.05668	TRUE	2	1	TRUE	NA
CM CD4+ AC	rs79668094	A	G	A	G	1.777	0.000717	0.001	0.01781	FALSE	FALSE	FALSE	4	64094440	0.000514	0.16	bladder cancer	TRUE	3.63e-06	4	64094440	3395	0.383	TRUE	2	1	TRUE	NA
CM CD4+ AC	rs9271622	A	G	A	G	0.1821	5.43e-05	0.7477	0.819925	FALSE	FALSE	FALSE	6	32591976	0.000176	0.760001	bladder cancer	TRUE	1.83e-07	6	32591845	3395	0.03484	TRUE	2	1	TRUE	NA
HLA DR+ CD4+ AC	rs10148838	C	G	C	G	-0.2544	0.000138	0.227	0.175163	FALSE	TRUE	FALSE	14	20261108	0.000273	0.61	bladder cancer	TRUE	7.63e-07	14	20261108	3579	0.05136	TRUE	2	1	TRUE	NA
HLA DR+ CD4+ AC	rs10787670	C	T	C	T	-0.1963	0.000338	0.9173	0.91099	FALSE	FALSE	FALSE	10	118187405	0.000238	0.16	bladder cancer	TRUE	6.14e-06	10	118187405	3579	0.04335	TRUE	2	1	TRUE	NA
HLA DR+ CD4+ AC	rs10845930	C	T	C	T	0.1584	0.000157	0.8639	0.925825	FALSE	FALSE	FALSE	12	14382617	0.000259	0.54	bladder cancer	TRUE	6.03e-06	12	14382617	3579	0.03494	TRUE	2	1	TRUE	NA
HLA DR+ CD4+ AC	rs11251832	A	G	A	G	0.1894	-7.78e-05	0.0884	0.125876	FALSE	FALSE	FALSE	10	3327039	0.000204	0.7	bladder cancer	TRUE	6.44e-06	10	3327039	3579	0.04192	TRUE	2	1	TRUE	NA
HLA DR+ CD4+ AC	rs117110835	A	G	A	G	-0.783	0.000193	0.0047	0.041051	FALSE	FALSE	FALSE	15	45945654	0.000345	0.58	bladder cancer	TRUE	9.29e-06	15	45945654	3579	0.1764	TRUE	2	1	TRUE	NA
HLA DR+ CD4+ AC	rs12166155	G	C	G	C	0.1146	-0.000298	0.3564	0.416546	FALSE	TRUE	FALSE	22	44999166	0.000142	0.0359998	bladder cancer	TRUE	4.7e-06	22	44999166	3579	0.025	TRUE	2	1	TRUE	NA
HLA DR+ CD4+ AC	rs1322067	G	A	G	A	-0.1511	0.000195	0.4173	0.430096	FALSE	FALSE	FALSE	9	117660933	0.000137	0.16	bladder cancer	TRUE	4.75e-09	9	117660933	3579	0.02575	TRUE	2	1	TRUE	NA
HLA DR+ CD4+ AC	rs17198888	G	A	G	A	-0.2281	7.54e-05	0.0802	0.190481	FALSE	FALSE	FALSE	6	31266015	0.000172	0.66	bladder cancer	TRUE	1.93e-06	6	31266015	3579	0.04783	TRUE	2	1	TRUE	NA
HLA DR+ CD4+ AC	rs17824379	G	A	G	A	-0.9842	0.000827	0.0027	0.014058	FALSE	FALSE	FALSE	3	5810961	0.000613	0.18	bladder cancer	TRUE	9.64e-06	3	5810961	3579	0.2221	TRUE	2	1	TRUE	NA
HLA DR+ CD4+ AC	rs2064600	A	G	A	G	-0.3548	-0.000854	0.0295	0.015715	FALSE	FALSE	FALSE	1	1220504	0.000546	0.12	bladder cancer	TRUE	1.53e-06	1	1220504	3579	0.07367	TRUE	2	1	TRUE	NA
HLA DR+ CD4+ AC	rs2977197	C	G	C	G	-0.1662	0.000611	0.8806	0.923034	FALSE	TRUE	FALSE	8	1706971	0.000256	0.017	bladder cancer	TRUE	7.03e-06	8	1690475	3579	0.03693	TRUE	2	1	TRUE	NA
HLA DR+ CD4+ AC	rs3087456	A	G	A	G	-0.2926	0.000313	0.766	0.742644	FALSE	FALSE	FALSE	16	10970902	0.000155	0.0430002	bladder cancer	TRUE	1.4e-25	16	10970902	3579	0.02777	TRUE	2	1	TRUE	NA
HLA DR+ CD4+ AC	rs3134968	G	A	G	A	0.3737	7.92e-05	0.9761	0.761736	FALSE	FALSE	FALSE	6	32678206	0.00016	0.62	bladder cancer	TRUE	2.23e-06	6	32674059	3579	0.07884	TRUE	2	1	TRUE	NA
HLA DR+ CD4+ AC	rs55849757	T	C	T	C	-0.1129	8.61e-05	0.5545	0.420827	FALSE	FALSE	FALSE	3	75122371	0.000138	0.53	bladder cancer	TRUE	3.69e-06	3	75122371	3579	0.02435	TRUE	2	1	TRUE	NA
HLA DR+ CD4+ AC	rs62166973	A	G	A	G	-0.4445	0.000134	0.0148	0.056517	FALSE	FALSE	FALSE	2	121359390	0.000337	0.69	bladder cancer	TRUE	6.76e-06	2	121359390	3579	0.09861	TRUE	2	1	TRUE	NA
HLA DR+ CD4+ AC	rs62417423	G	A	G	A	-0.1396	-1.26e-05	0.1949	0.126823	FALSE	FALSE	FALSE	6	114211974	0.000203	0.95	bladder cancer	TRUE	5.67e-06	6	114211974	3579	0.03071	TRUE	2	1	TRUE	NA
HLA DR+ CD4+ AC	rs6767083	A	C	A	C	0.1335	0.000239	0.2311	0.247915	FALSE	FALSE	FALSE	3	179838990	0.000157	0.13	bladder cancer	TRUE	2.78e-06	3	179838990	3579	0.02844	TRUE	2	1	TRUE	NA
HLA DR+ CD4+ AC	rs6891593	A	G	A	G	0.3491	-0.000464	0.0239	0.037884	FALSE	FALSE	FALSE	5	155005574	0.000354	0.19	bladder cancer	TRUE	5.62e-06	5	155005574	3579	0.07676	TRUE	2	1	TRUE	NA
HLA DR+ CD4+ AC	rs7150202	T	A	T	A	0.1473	-0.00017	0.1707	0.17593	FALSE	TRUE	FALSE	14	80335426	0.00018	0.34	bladder cancer	TRUE	3.33e-06	14	80335426	3579	0.03164	TRUE	2	1	TRUE	NA
HLA DR+ CD4+ AC	rs7405251	G	T	G	T	-0.1151	0.00032	0.6014	0.683893	FALSE	FALSE	FALSE	16	10829272	0.000146	0.0280001	bladder cancer	TRUE	3.35e-06	16	10829272	3579	0.02473	TRUE	2	1	TRUE	NA
HLA DR+ CD4+ AC	rs78229126	A	C	A	C	0.1603	-0.000468	0.1357	0.085034	FALSE	FALSE	FALSE	10	11713685	0.000243	0.0549997	bladder cancer	TRUE	3.23e-06	10	11713685	3579	0.03437	TRUE	2	1	TRUE	NA
HLA DR+ CD4+ AC	rs79769908	G	T	G	T	-0.1766	-0.000261	0.1023	0.076732	FALSE	FALSE	FALSE	7	70660195	0.000254	0.3	bladder cancer	TRUE	9.98e-06	7	70660195	3579	0.03991	TRUE	2	1	TRUE	NA
HLA DR+ CD4+ AC	rs9613063	T	C	T	C	-0.1553	-0.00017	0.1913	0.156921	FALSE	FALSE	FALSE	22	26382004	0.000187	0.36	bladder cancer	TRUE	2.5e-07	22	26382004	3579	0.03005	TRUE	2	1	TRUE	NA
HLA DR+ T cell%T cell	rs10244964	T	G	T	G	-1.414	0.000378	0.0013	0.037449	FALSE	FALSE	FALSE	7	46432552	0.000358	0.29	bladder cancer	TRUE	3.08e-06	7	46432552	3596	0.3025	TRUE	2	1	TRUE	NA
HLA DR+ T cell%T cell	rs10788105	A	G	A	G	0.2157	-0.000184	0.0601	0.167346	FALSE	FALSE	FALSE	10	122390777	0.000181	0.31	bladder cancer	TRUE	4.95e-06	10	122390777	3596	0.04716	TRUE	2	1	TRUE	NA
HLA DR+ T cell%T cell	rs1084560	G	A	G	A	-0.1328	0.000259	0.5726	0.66426	FALSE	FALSE	FALSE	16	10824872	0.000143	0.0700003	bladder cancer	TRUE	9.71e-09	16	10824872	3596	0.02309	TRUE	2	1	TRUE	NA
HLA DR+ T cell%T cell	rs11054779	T	G	T	G	0.2888	0.000232	0.0331	0.059892	FALSE	FALSE	FALSE	12	12458534	0.000286	0.42	bladder cancer	TRUE	3.7e-06	12	12457054	3596	0.06232	TRUE	2	1	TRUE	NA
HLA DR+ T cell%T cell	rs116797692	A	G	A	G	-0.3105	-0.000287	0.0292	0.018974	FALSE	FALSE	FALSE	2	158854583	0.000495	0.56	bladder cancer	TRUE	9.51e-06	2	158854583	3596	0.07001	TRUE	2	1	TRUE	NA
HLA DR+ T cell%T cell	rs117014352	T	C	T	C	-0.9683	-0.000341	0.0028	0.020807	FALSE	FALSE	FALSE	10	76784567	0.000478	0.48	bladder cancer	TRUE	2.25e-06	10	76784567	3596	0.2044	TRUE	2	1	TRUE	NA
HLA DR+ T cell%T cell	rs12601032	A	G	A	G	-0.1065	0.000168	0.3598	0.30456	FALSE	FALSE	FALSE	17	11457702	0.000148	0.26	bladder cancer	TRUE	5.73e-06	17	11457702	3596	0.02345	TRUE	2	1	TRUE	NA
HLA DR+ T cell%T cell	rs138213638	C	T	C	T	1.483	-0.000179	0.0014	0.021717	FALSE	FALSE	FALSE	18	55985546	0.000475	0.709999	bladder cancer	TRUE	1.39e-06	18	55985546	3596	0.3068	TRUE	2	1	TRUE	NA
HLA DR+ T cell%T cell	rs138678763	C	T	C	T	-0.7017	-0.000385	0.005	0.014275	FALSE	FALSE	FALSE	8	11817727	0.000578	0.51	bladder cancer	TRUE	9.53e-06	8	11817727	3596	0.1583	TRUE	2	1	TRUE	NA
HLA DR+ T cell%T cell	rs140410174	T	C	T	C	-0.2381	0.000121	0.0598	0.039069	FALSE	FALSE	FALSE	19	1671156	0.000364	0.74	bladder cancer	TRUE	7.9e-07	19	1671156	3596	0.04814	TRUE	2	1	TRUE	NA
HLA DR+ T cell%T cell	rs144674286	A	G	A	G	0.2231	-0.000209	0.0628	0.088221	FALSE	FALSE	FALSE	9	101028704	0.000239	0.38	bladder cancer	TRUE	5.19e-06	9	101028704	3596	0.04888	TRUE	2	1	TRUE	NA
HLA DR+ T cell%T cell	rs145794521	A	G	A	G	2.031	-0.00115435	0.0006	0.015506	FALSE	FALSE	FALSE	3	74944494	0.000552	0.0359998	bladder cancer	TRUE	7.65e-06	3	74944494	3596	0.4533	TRUE	2	1	TRUE	NA
HLA DR+ T cell%T cell	rs148323639	A	G	A	G	0.3143	0.00144776	0.0317	0.010643	FALSE	FALSE	FALSE	4	27183687	0.000727	0.0460002	bladder cancer	TRUE	9.8e-07	4	27183687	3596	0.06409	TRUE	2	1	TRUE	NA
HLA DR+ T cell%T cell	rs3087456	A	G	A	G	-0.4611	0.000313	0.7661	0.742644	FALSE	FALSE	FALSE	16	10970902	0.000155	0.0430002	bladder cancer	TRUE	3.08e-70	16	10970902	3596	0.02546	TRUE	2	1	TRUE	NA
HLA DR+ T cell%T cell	rs3104414	A	G	A	G	0.1693	-8.95e-05	0.3813	0.334933	FALSE	FALSE	FALSE	6	32582612	0.000144	0.53	bladder cancer	TRUE	9.31e-09	6	32582612	3596	0.0294	TRUE	2	1	TRUE	NA
HLA DR+ T cell%T cell	rs506151	T	C	T	C	-0.3833	0.000217	0.02	0.051539	FALSE	FALSE	FALSE	13	110882752	0.000327	0.51	bladder cancer	TRUE	2.64e-06	13	110882752	3596	0.08148	TRUE	2	1	TRUE	NA
HLA DR+ T cell%T cell	rs542160	T	C	T	C	-0.1125	7.46e-05	0.5089	0.546107	FALSE	FALSE	FALSE	11	107676543	0.000136	0.58	bladder cancer	TRUE	8.19e-07	11	107676543	3596	0.02277	TRUE	2	1	TRUE	NA
HLA DR+ T cell%T cell	rs55724950	A	G	A	G	-0.2435	-0.000529	0.0654	0.030698	FALSE	FALSE	FALSE	16	10993712	0.000438	0.23	bladder cancer	TRUE	9.89e-08	16	10993712	3596	0.0456	TRUE	2	1	TRUE	NA
HLA DR+ T cell%T cell	rs62068717	T	C	T	C	-0.3778	0.000289	0.0204	0.027795	FALSE	FALSE	FALSE	17	50420836	0.000419	0.49	bladder cancer	TRUE	8.05e-06	17	50420836	3596	0.08451	TRUE	2	1	TRUE	NA
HLA DR+ T cell%T cell	rs687184	C	G	C	G	0.1347	8.68e-05	0.8184	0.852359	FALSE	TRUE	FALSE	9	22725624	0.000192	0.649999	bladder cancer	TRUE	5.39e-06	9	22725624	3596	0.02956	TRUE	2	1	TRUE	NA
HLA DR+ T cell%T cell	rs7032773	T	C	T	C	-0.1471	0.000211	0.4182	0.429166	FALSE	FALSE	FALSE	9	117645562	0.000137	0.12	bladder cancer	TRUE	1.46e-09	9	117645562	3596	0.02426	TRUE	2	1	TRUE	NA
HLA DR+ T cell%T cell	rs7047722	A	G	A	G	0.1033	-0.000117	0.6279	0.634536	FALSE	FALSE	FALSE	9	101548105	0.00014	0.41	bladder cancer	TRUE	8.94e-06	9	101548105	3596	0.02322	TRUE	2	1	TRUE	NA
HLA DR+ T cell%T cell	rs7088079	A	G	A	G	-0.1849	0.000143	0.0891	0.053233	FALSE	FALSE	FALSE	10	3066899	0.000308	0.64	bladder cancer	TRUE	2.43e-06	10	3066899	3596	0.03916	TRUE	2	1	TRUE	NA
HLA DR+ T cell%T cell	rs7127620	G	A	G	A	0.1021	1.66e-05	0.46	0.33491	FALSE	FALSE	FALSE	11	86071947	0.000144	0.91	bladder cancer	TRUE	7.74e-06	11	86071947	3596	0.0228	TRUE	2	1	TRUE	NA
HLA DR+ T cell%T cell	rs71381201	G	T	G	T	-0.245	-0.00074	0.0517	0.026699	FALSE	FALSE	FALSE	16	11357860	0.000422	0.08	bladder cancer	TRUE	1.9e-06	16	11357860	3596	0.05135	TRUE	2	1	TRUE	NA
HLA DR+ T cell%T cell	rs7294683	G	A	G	A	0.1028	-9.57e-05	0.3899	0.435914	FALSE	FALSE	FALSE	12	126542791	0.000137	0.48	bladder cancer	TRUE	9.23e-06	12	126542791	3596	0.02315	TRUE	2	1	TRUE	NA
HLA DR+ T cell%T cell	rs73030989	T	C	T	C	1.729	0.000426	0.0013	0.017619	FALSE	FALSE	FALSE	19	38996871	0.000579	0.46	bladder cancer	TRUE	3.95e-07	19	38996871	3596	0.3404	TRUE	2	1	TRUE	NA
HLA DR+ T cell%T cell	rs76997602	G	A	G	A	-0.3744	-0.000779	0.0178	0.030351	FALSE	FALSE	FALSE	7	115451309	0.000401	0.0519996	bladder cancer	TRUE	8.21e-06	7	115451309	3596	0.08384	TRUE	2	1	TRUE	NA
HLA DR+ T cell%T cell	rs78648104	C	T	C	T	-0.1411	0.000208	0.1714	0.0856	FALSE	FALSE	FALSE	6	50683009	0.000242	0.39	bladder cancer	TRUE	6.53e-06	6	50683009	3596	0.03125	TRUE	2	1	TRUE	NA
HLA DR+ T cell%T cell	rs79132531	G	A	G	A	0.1937	-0.000225	0.0749	0.014629	FALSE	FALSE	FALSE	11	107259543	0.00058	0.7	bladder cancer	TRUE	9.23e-06	11	107259543	3596	0.04361	TRUE	2	1	TRUE	NA
HLA DR+ T cell%T cell	rs79178843	A	G	A	G	0.548	0.000222	0.0097	0.023819	FALSE	FALSE	FALSE	2	13251154	0.000443	0.62	bladder cancer	TRUE	2.25e-06	2	13251154	3596	0.1157	TRUE	2	1	TRUE	NA
HLA DR+ T cell%T cell	rs9526689	A	G	A	G	0.4774	-0.000195	0.0106	0.074332	FALSE	FALSE	FALSE	13	51299267	0.000264	0.46	bladder cancer	TRUE	7.56e-06	13	51299267	3596	0.1065	TRUE	2	1	TRUE	NA
SSC-A on plasmacytoid DC	rs10193587	C	T	C	T	0.1493	-6.53e-05	0.7214	0.242203	FALSE	FALSE	FALSE	2	136925439	0.000158	0.68	bladder cancer	TRUE	1.27e-06	2	136925439	2872	0.03074	TRUE	2	1	TRUE	NA
SSC-A on plasmacytoid DC	rs11164360	C	T	C	T	0.8331	-0.00037	0.0061	0.084096	FALSE	FALSE	FALSE	1	102472108	0.000244	0.13	bladder cancer	TRUE	4.94e-06	1	102472108	2872	0.1821	TRUE	2	1	TRUE	NA
SSC-A on plasmacytoid DC	rs117067704	G	A	G	A	0.4562	2.95e-05	0.0232	0.015493	FALSE	FALSE	FALSE	17	62128083	0.000575	0.96	bladder cancer	TRUE	4.15e-07	17	62128083	2872	0.08992	TRUE	2	1	TRUE	NA
SSC-A on plasmacytoid DC	rs12410542	T	C	T	C	-0.1237	0.000127	0.5218	0.636923	FALSE	FALSE	FALSE	1	77233774	0.000141	0.37	bladder cancer	TRUE	6.93e-06	1	77233774	2872	0.02747	TRUE	2	1	TRUE	NA
SSC-A on plasmacytoid DC	rs13162242	G	T	G	T	-0.1812	0.000144	0.1382	0.127622	FALSE	FALSE	FALSE	5	74298665	0.000202	0.48	bladder cancer	TRUE	6.69e-06	5	74298665	2872	0.04016	TRUE	2	1	TRUE	NA
SSC-A on plasmacytoid DC	rs142456232	T	C	T	C	-0.3341	-0.000651	0.0573	0.024345	FALSE	FALSE	FALSE	11	4960640	0.00044	0.14	bladder cancer	TRUE	1.81e-08	11	4960640	2872	0.05919	TRUE	2	1	TRUE	NA
SSC-A on plasmacytoid DC	rs144283125	G	A	G	A	-0.3578	-0.000556	0.0312	0.025209	FALSE	FALSE	FALSE	21	34218354	0.000435	0.2	bladder cancer	TRUE	5.99e-06	21	34218354	2872	0.0789	TRUE	2	1	TRUE	NA
SSC-A on plasmacytoid DC	rs17552904	T	G	T	G	-0.1851	0.000136	0.245	0.254882	FALSE	FALSE	FALSE	7	50318308	0.000156	0.38	bladder cancer	TRUE	1.2e-08	7	50318308	2872	0.03237	TRUE	2	1	TRUE	NA
SSC-A on plasmacytoid DC	rs17791425	A	G	A	G	0.3189	0.000253	0.0442	0.055479	FALSE	FALSE	FALSE	6	84970341	0.000299	0.4	bladder cancer	TRUE	2.54e-06	6	84970341	2872	0.06764	TRUE	2	1	TRUE	NA
SSC-A on plasmacytoid DC	rs2058319	G	A	G	A	0.1289	-0.000132	0.652	0.541919	FALSE	FALSE	FALSE	19	56863306	0.000136	0.33	bladder cancer	TRUE	7.57e-06	19	56863306	2872	0.02873	TRUE	2	1	TRUE	NA
SSC-A on plasmacytoid DC	rs2903918	G	C	G	C	-0.2195	9.53e-05	0.3407	0.355685	FALSE	TRUE	FALSE	4	84172614	0.000142	0.5	bladder cancer	TRUE	4.31e-14	4	84157443	2872	0.02892	TRUE	2	1	TRUE	NA
SSC-A on plasmacytoid DC	rs2923129	A	G	A	G	0.1539	0.000124	0.2274	0.292765	FALSE	FALSE	FALSE	16	57726123	0.000159	0.44	bladder cancer	TRUE	2.27e-06	16	57726123	2872	0.03247	TRUE	2	1	TRUE	NA
SSC-A on plasmacytoid DC	rs55733613	C	G	C	G	-0.1957	0.000214	0.1628	0.104315	FALSE	TRUE	FALSE	16	89141723	0.000221	0.34	bladder cancer	TRUE	3.19e-07	16	89141723	2872	0.03819	TRUE	2	1	TRUE	NA
SSC-A on plasmacytoid DC	rs6500136	A	G	A	G	0.1344	-1.51e-05	0.3917	0.388249	FALSE	FALSE	FALSE	16	60631203	0.000139	0.91	bladder cancer	TRUE	2.78e-06	16	60631203	2872	0.02863	TRUE	2	1	TRUE	NA
SSC-A on plasmacytoid DC	rs6564921	A	T	A	T	0.1566	0.000267	0.8048	0.862431	FALSE	TRUE	FALSE	16	74142321	0.000196	0.17	bladder cancer	TRUE	8.57e-06	16	74142321	2872	0.03513	TRUE	2	1	TRUE	NA
SSC-A on plasmacytoid DC	rs6987643	C	T	C	T	-0.1298	-1.58e-05	0.3249	0.398116	FALSE	FALSE	FALSE	8	118028546	0.000138	0.91	bladder cancer	TRUE	8.65e-06	8	118028546	2872	0.02913	TRUE	2	1	TRUE	NA
SSC-A on plasmacytoid DC	rs71388573	G	T	G	T	-2.137	0.00157651	0.0009	0.010503	FALSE	FALSE	FALSE	16	4436279	0.000673	0.0189998	bladder cancer	TRUE	9.86e-06	16	4436279	2872	0.4826	TRUE	2	1	TRUE	NA
SSC-A on plasmacytoid DC	rs71423107	A	G	A	G	0.2975	0.000235	0.0679	0.046123	FALSE	FALSE	FALSE	2	242975103	0.000316	0.46	bladder cancer	TRUE	6.31e-06	2	242975103	2872	0.06577	TRUE	2	1	TRUE	NA
SSC-A on plasmacytoid DC	rs722926	T	C	T	C	0.1642	-3.24e-05	0.4102	0.394454	FALSE	FALSE	FALSE	17	8677215	0.000139	0.82	bladder cancer	TRUE	3.49e-09	17	8677215	2872	0.02772	TRUE	2	1	TRUE	NA
SSC-A on plasmacytoid DC	rs776409	G	T	G	T	0.1536	1.51e-05	0.2162	0.292242	FALSE	FALSE	FALSE	12	70018656	0.000152	0.92	bladder cancer	TRUE	6.3e-06	12	70018656	2872	0.03394	TRUE	2	1	TRUE	NA
SSC-A on plasmacytoid DC	rs78736654	G	T	G	T	-0.4036	0.000129	0.0378	0.010409	FALSE	FALSE	FALSE	11	5544477	0.000676	0.85	bladder cancer	TRUE	4.41e-08	11	5544477	2872	0.07353	TRUE	2	1	TRUE	NA
SSC-A on plasmacytoid DC	rs79711662	T	G	T	G	-0.4324	5.99e-05	0.0207	0.023686	FALSE	FALSE	FALSE	6	95562104	0.00051	0.91	bladder cancer	TRUE	6.41e-06	6	95562104	2872	0.09564	TRUE	2	1	TRUE	NA
SSC-A on plasmacytoid DC	rs80067671	C	T	C	T	-0.3673	0.000478	0.0286	0.025616	FALSE	FALSE	FALSE	7	24079081	0.000429	0.26	bladder cancer	TRUE	8.95e-06	7	24079081	2872	0.08255	TRUE	2	1	TRUE	NA
SSC-A on plasmacytoid DC	rs8022420	A	G	A	G	-0.1866	8.34e-05	0.8518	0.867672	FALSE	FALSE	FALSE	14	101652466	0.000202	0.68	bladder cancer	TRUE	1.68e-06	14	101652466	2872	0.03888	TRUE	2	1	TRUE	NA
SSC-A on plasmacytoid DC	rs9669659	A	G	A	G	-0.5379	0.000602	0.0146	0.028452	FALSE	FALSE	FALSE	12	52279540	0.000408	0.14	bladder cancer	TRUE	2.94e-06	12	52279540	2872	0.1148	TRUE	2	1	TRUE	NA
