# Supplementary material for: Causal relationship between immune cells and bladder cancer: a bi-directional Mendelian randomization study
Source: Research Square preprint supplement (doi:10.21203/rs.3.rs-4540897/v1), 2024-06-26
Supplement: Supplementary file 3 [file cb211f1aab3376adc819d944.xlsx]

## Sheet: Table 1.xlsx
Supplementary Table 1: Descriptive detail of SNP associated with immune cells
exposure	SNP	effect_allele.exposure	other_allele.exposure	effect_allele.outcome	other_allele.outcome	beta.exposure	beta.outcome	eaf.exposure	eaf.outcome	remove	palindromic	ambiguous	id.outcome	chr	pos	se.outcome	samplesize.outcome	pval.outcome	outcome	mr_keep.outcome	proxy.outcome	target_snp.outcome	proxy_snp.outcome	target_a1.outcome	target_a2.outcome	proxy_a1.outcome	proxy_a2.outcome	pval.exposure	chr.exposure	pos.exposure	samplesize.exposure	se.exposure	mr_keep.exposure	action	SNP_index	mr_keep
DP (CD4+CD8+) AC	rs10002165	C	T	C	T	-0.3786	-0.000587251	0.0216	0.022541	FALSE	FALSE	FALSE	ieu-b-4874	4	145233527	0.000491038	373295	0.23	bladder cancer	TRUE	NA	NA	NA	NA	NA	NA	NA	9.12e-06	4	145233527	3652	0.08521	TRUE	2	1	TRUE
DP (CD4+CD8+) AC	rs10851760	G	A	G	A	-0.1506	0.000140177	0.8111	0.696185	FALSE	FALSE	FALSE	ieu-b-4874	15	66871840	0.000146887	373295	0.34	bladder cancer	TRUE	NA	NA	NA	NA	NA	NA	NA	2.34e-06	15	66871840	3652	0.03184	TRUE	2	1	TRUE
DP (CD4+CD8+) AC	rs11025036	A	G	A	G	-0.4567	-0.000101429	0.022	0.037643	FALSE	FALSE	FALSE	ieu-b-4874	11	19175633	0.000356947	373295	0.780001	bladder cancer	TRUE	NA	NA	NA	NA	NA	NA	NA	3.35e-08	11	19175633	3652	0.08253	TRUE	2	1	TRUE
DP (CD4+CD8+) AC	rs117166897	G	A	G	A	-0.2471	0.000511862	0.0561	0.014479	FALSE	FALSE	FALSE	ieu-b-4874	10	10964820	0.000564961	373295	0.36	bladder cancer	TRUE	NA	NA	NA	NA	NA	NA	NA	4.23e-06	10	10964820	3652	0.05363	TRUE	2	1	TRUE
DP (CD4+CD8+) AC	rs11725463	G	A	G	A	-0.2338	-4.79e-05	0.0589	0.086761	FALSE	FALSE	FALSE	ieu-b-4874	4	94584105	0.000239788	373295	0.84	bladder cancer	TRUE	NA	NA	NA	NA	NA	NA	NA	9.07e-06	4	94584105	3652	0.05261	TRUE	2	1	TRUE
DP (CD4+CD8+) AC	rs12142860	T	G	T	G	0.5894	-0.000203167	0.0096	0.018895	FALSE	FALSE	FALSE	ieu-b-4874	1	215998585	0.000496663	373295	0.68	bladder cancer	TRUE	NA	NA	NA	NA	NA	NA	NA	4.97e-06	1	215998585	3652	0.1289	TRUE	2	1	TRUE
DP (CD4+CD8+) AC	rs147688743	A	G	A	G	-0.4601	0.000897792	0.0153	0.016861	FALSE	FALSE	FALSE	ieu-b-4874	10	64810319	0.000527466	373295	0.089	bladder cancer	TRUE	NA	NA	NA	NA	NA	NA	NA	3.45e-06	10	64810319	3652	0.09898	TRUE	2	1	TRUE
DP (CD4+CD8+) AC	rs1764923	T	G	T	G	-0.1177	4.48e-05	0.4094	0.237756	FALSE	FALSE	FALSE	ieu-b-4874	13	86328055	0.000162112	373295	0.780001	bladder cancer	TRUE	NA	NA	NA	NA	NA	NA	NA	3.96e-06	13	86328055	3652	0.02548	TRUE	2	1	TRUE
DP (CD4+CD8+) AC	rs2857229	G	A	G	A	0.273	-6.29e-05	0.2581	0.324902	FALSE	FALSE	FALSE	ieu-b-4874	12	6900616	0.000144314	373295	0.66	bladder cancer	TRUE	NA	NA	NA	NA	NA	NA	NA	1.03e-22	12	6900616	3652	0.02764	TRUE	2	1	TRUE
DP (CD4+CD8+) AC	rs6022045	C	T	C	T	-0.1144	-0.000421089	0.5743	0.517355	FALSE	FALSE	FALSE	ieu-b-4874	20	51305288	0.000135143	373295	0.00179999	bladder cancer	TRUE	NA	NA	NA	NA	NA	NA	NA	5.16e-06	20	51305288	3652	0.02505	TRUE	2	1	TRUE
DP (CD4+CD8+) AC	rs62314120	A	G	A	G	0.1612	-0.000233382	0.1353	0.12353	FALSE	FALSE	FALSE	ieu-b-4874	4	126951113	0.000205997	373295	0.26	bladder cancer	TRUE	NA	NA	NA	NA	NA	NA	NA	7.96e-06	4	126951113	3652	0.03605	TRUE	2	1	TRUE
DP (CD4+CD8+) AC	rs7141604	T	C	T	C	0.1146	2.54e-05	0.3499	0.383184	FALSE	FALSE	FALSE	ieu-b-4874	14	21252046	0.000140495	373295	0.86	bladder cancer	TRUE	NA	NA	NA	NA	NA	NA	NA	7.82e-06	14	21252046	3652	0.0256	TRUE	2	1	TRUE
DP (CD4+CD8+) AC	rs7160965	C	T	C	T	0.1768	8.8e-05	0.8951	0.920572	FALSE	FALSE	FALSE	ieu-b-4874	14	31506505	0.000249883	373295	0.719999	bladder cancer	TRUE	NA	NA	NA	NA	NA	NA	NA	9.02e-06	14	31506505	3652	0.03976	TRUE	2	1	TRUE
DP (CD4+CD8+) AC	rs72694502	C	T	C	T	-0.3783	-0.000349258	0.0219	0.017406	FALSE	FALSE	FALSE	ieu-b-4874	14	85161244	0.000517304	373295	0.5	bladder cancer	TRUE	NA	NA	NA	NA	NA	NA	NA	5.15e-06	14	85161244	3652	0.08288	TRUE	2	1	TRUE
DP (CD4+CD8+) AC	rs72728134	T	A	T	A	0.1231	4.74e-05	0.2833	0.269928	FALSE	TRUE	FALSE	ieu-b-4874	1	100596929	0.000153719	373295	0.760001	bladder cancer	TRUE	NA	NA	NA	NA	NA	NA	NA	7.9e-06	1	100596929	3652	0.02752	TRUE	2	1	TRUE
DP (CD4+CD8+) AC	rs75275131	G	A	G	A	0.6861	-0.000224043	0.0074	0.019689	FALSE	FALSE	FALSE	ieu-b-4874	2	4425244	0.000505024	373295	0.66	bladder cancer	TRUE	NA	NA	NA	NA	NA	NA	NA	2.03e-06	2	4425244	3652	0.1442	TRUE	2	1	TRUE
DP (CD4+CD8+) AC	rs77965313	C	A	C	A	-0.3127	0.000350928	0.0377	0.071856	FALSE	FALSE	FALSE	ieu-b-4874	9	120915115	0.000261829	373295	0.18	bladder cancer	TRUE	NA	NA	NA	NA	NA	NA	NA	1.82e-06	9	120915115	3652	0.06542	TRUE	2	1	TRUE
DP (CD4+CD8+) AC	rs857241	G	T	G	T	-0.9906	5.26e-06	0.0033	0.028707	FALSE	FALSE	FALSE	ieu-b-4874	20	3078879	0.000450565	373295	0.99	bladder cancer	TRUE	NA	NA	NA	NA	NA	NA	NA	4.4e-06	20	3078879	3652	0.2154	TRUE	2	1	TRUE
DP (CD4+CD8+) AC	rs9493240	A	G	A	G	0.1385	-0.000100422	0.3097	0.314591	FALSE	FALSE	FALSE	ieu-b-4874	6	132534887	0.000145958	373295	0.49	bladder cancer	TRUE	NA	NA	NA	NA	NA	NA	NA	3.35e-07	6	132534887	3652	0.0271	TRUE	2	1	TRUE
TD DN (CD4-CD8-) %T cell	rs10003087	G	T	G	T	0.127	1.86e-05	0.3764	0.405808	FALSE	FALSE	FALSE	ieu-b-4874	4	172937884	0.000137651	373295	0.89	bladder cancer	TRUE	NA	NA	NA	NA	NA	NA	NA	1.84e-06	4	172937884	3427	0.02658	TRUE	2	1	TRUE
TD DN (CD4-CD8-) %T cell	rs10876180	T	C	T	C	-0.1219	0.000216319	0.6315	0.540653	FALSE	FALSE	FALSE	ieu-b-4874	12	51836616	0.000135713	373295	0.11	bladder cancer	TRUE	NA	NA	NA	NA	NA	NA	NA	4.83e-06	12	51836616	3427	0.02662	TRUE	2	1	TRUE
TD DN (CD4-CD8-) %T cell	rs10920583	A	G	A	G	0.1148	9.76e-05	0.4943	0.48504	FALSE	FALSE	FALSE	ieu-b-4874	1	190099416	0.000135847	373295	0.47	bladder cancer	TRUE	NA	NA	NA	NA	NA	NA	NA	7.13e-06	1	190099416	3427	0.02554	TRUE	2	1	TRUE
TD DN (CD4-CD8-) %T cell	rs111983490	A	G	A	G	-0.2166	0.000104722	0.2107	0.048088	FALSE	FALSE	FALSE	ieu-b-4874	6	32205324	0.000315702	373295	0.74	bladder cancer	TRUE	NA	NA	NA	NA	NA	NA	NA	3.74e-09	6	32205324	3427	0.03665	TRUE	2	1	TRUE
TD DN (CD4-CD8-) %T cell	rs114892491	T	C	T	C	-0.2886	0.00167363	0.042	0.011276	FALSE	FALSE	FALSE	ieu-b-4874	1	156921889	0.000652997	373295	0.01	bladder cancer	TRUE	NA	NA	NA	NA	NA	NA	NA	4.13e-06	1	156921889	3427	0.06257	TRUE	2	1	TRUE
TD DN (CD4-CD8-) %T cell	rs116088408	T	A	T	A	-0.6539	0.000118795	0.0083	0.016848	FALSE	TRUE	FALSE	ieu-b-4874	12	27632799	0.00052467	373295	0.82	bladder cancer	TRUE	NA	NA	NA	NA	NA	NA	NA	2.33e-06	12	27632799	3427	0.1382	TRUE	2	1	TRUE
TD DN (CD4-CD8-) %T cell	rs117481225	C	T	C	T	-1.329	0.00115868	0.0019	0.01022	FALSE	FALSE	FALSE	ieu-b-4874	7	146971931	0.000677534	373295	0.0870001	bladder cancer	TRUE	NA	NA	NA	NA	NA	NA	NA	9.63e-06	7	146971931	3427	0.2999	TRUE	2	1	TRUE
TD DN (CD4-CD8-) %T cell	rs142421834	G	A	G	A	-0.493	-0.000592882	0.0128	0.016322	FALSE	FALSE	FALSE	ieu-b-4874	5	53045368	0.000542501	373295	0.27	bladder cancer	TRUE	TRUE	rs142421834	rs142192905	G	A	T	C	7.91e-06	5	52915612	3427	0.1102	TRUE	2	1	TRUE
TD DN (CD4-CD8-) %T cell	rs146907982	A	G	A	G	0.2461	-0.000189653	0.0584	0.06973	FALSE	FALSE	FALSE	ieu-b-4874	9	120231514	0.000271191	373295	0.48	bladder cancer	TRUE	NA	NA	NA	NA	NA	NA	NA	8.73e-06	9	120231514	3427	0.05526	TRUE	2	1	TRUE
TD DN (CD4-CD8-) %T cell	rs147717252	A	T	A	T	-1.179	0.000153703	0.0023	0.013193	FALSE	TRUE	FALSE	ieu-b-4874	7	27783271	0.000591238	373295	0.79	bladder cancer	TRUE	TRUE	rs147717252	rs77739948	A	T	A	G	5.09e-06	7	27567035	3427	0.2581	TRUE	2	1	TRUE
TD DN (CD4-CD8-) %T cell	rs17692789	A	C	A	C	0.4277	-7.6e-05	0.0182	0.046548	FALSE	FALSE	FALSE	ieu-b-4874	7	122641368	0.000322229	373295	0.81	bladder cancer	TRUE	NA	NA	NA	NA	NA	NA	NA	5.02e-06	7	122641368	3427	0.09356	TRUE	2	1	TRUE
TD DN (CD4-CD8-) %T cell	rs28584364	T	C	T	C	0.3118	-7.13e-07	0.6185	0.491773	FALSE	FALSE	FALSE	ieu-b-4874	6	32518235	0.000136676	373295	1	bladder cancer	TRUE	TRUE	rs28584364	rs66931410	C	T	T	C	1.43e-09	6	32512048	3427	0.05137	TRUE	2	1	TRUE
TD DN (CD4-CD8-) %T cell	rs35706962	T	C	T	C	0.558	-7.55e-05	0.0114	0.071576	FALSE	FALSE	FALSE	ieu-b-4874	11	106402698	0.000275337	373295	0.780001	bladder cancer	TRUE	NA	NA	NA	NA	NA	NA	NA	5.55e-06	11	106402698	3427	0.1226	TRUE	2	1	TRUE
TD DN (CD4-CD8-) %T cell	rs36060603	G	A	G	A	0.1294	0.000151546	0.5201	0.431247	FALSE	FALSE	FALSE	ieu-b-4874	3	78637361	0.000136527	373295	0.27	bladder cancer	TRUE	NA	NA	NA	NA	NA	NA	NA	5.11e-07	3	78637361	3427	0.02573	TRUE	2	1	TRUE
TD DN (CD4-CD8-) %T cell	rs541367304	A	G	A	G	1.561	4.45e-05	0.0032	0.020182	FALSE	FALSE	FALSE	ieu-b-4874	1	198283058	0.000524657	373295	0.93	bladder cancer	TRUE	NA	NA	NA	NA	NA	NA	NA	3.7e-09	1	198283058	3427	0.264	TRUE	2	1	TRUE
TD DN (CD4-CD8-) %T cell	rs57305384	C	G	C	G	0.2029	-3.51e-05	0.1142	0.070815	FALSE	TRUE	FALSE	ieu-b-4874	1	229002885	0.000265521	373295	0.89	bladder cancer	TRUE	NA	NA	NA	NA	NA	NA	NA	4.73e-07	1	229002885	3427	0.04021	TRUE	2	1	TRUE
TD DN (CD4-CD8-) %T cell	rs6751481	C	T	C	T	0.1217	-8.27e-05	0.4704	0.518483	FALSE	FALSE	FALSE	ieu-b-4874	2	38897810	0.000136781	373295	0.55	bladder cancer	TRUE	NA	NA	NA	NA	NA	NA	NA	2.36e-06	2	38897810	3427	0.02575	TRUE	2	1	TRUE
TD DN (CD4-CD8-) %T cell	rs6755452	G	T	G	T	0.1903	0.000137206	0.1886	0.252828	FALSE	FALSE	FALSE	ieu-b-4874	2	87035076	0.000157511	373295	0.38	bladder cancer	TRUE	NA	NA	NA	NA	NA	NA	NA	4.75e-09	2	87035076	3427	0.03241	TRUE	2	1	TRUE
TD DN (CD4-CD8-) %T cell	rs7530076	A	G	A	G	-0.4005	-0.000277952	0.9748	0.970254	FALSE	FALSE	FALSE	ieu-b-4874	1	195825276	0.000397954	373295	0.48	bladder cancer	TRUE	NA	NA	NA	NA	NA	NA	NA	1.74e-06	1	195825276	3427	0.08361	TRUE	2	1	TRUE
TD DN (CD4-CD8-) %T cell	rs76673582	T	C	T	C	-0.2404	0.000209616	0.0681	0.101848	FALSE	FALSE	FALSE	ieu-b-4874	5	149707778	0.000224397	373295	0.35	bladder cancer	TRUE	TRUE	rs76673582	rs11750343	T	C	G	A	3.56e-06	5	149696943	3427	0.05179	TRUE	2	1	TRUE
TD DN (CD4-CD8-) %T cell	rs78513507	T	C	T	C	0.3462	-0.000881733	0.0285	0.036379	FALSE	FALSE	FALSE	ieu-b-4874	5	98468131	0.000367287	373295	0.016	bladder cancer	TRUE	NA	NA	NA	NA	NA	NA	NA	7.26e-06	5	98468131	3427	0.07706	TRUE	2	1	TRUE
TD DN (CD4-CD8-) %T cell	rs78911530	A	G	A	G	-0.7933	-7.55e-05	0.0053	0.037127	FALSE	FALSE	FALSE	ieu-b-4874	2	67543324	0.000362236	373295	0.83	bladder cancer	TRUE	NA	NA	NA	NA	NA	NA	NA	4.8e-06	2	67543324	3427	0.1732	TRUE	2	1	TRUE
TD DN (CD4-CD8-) %T cell	rs9266797	T	C	T	C	0.15	9.03e-05	0.4581	0.251291	FALSE	FALSE	FALSE	ieu-b-4874	6	31363510	0.000156797	373295	0.56	bladder cancer	TRUE	NA	NA	NA	NA	NA	NA	NA	1.58e-06	6	31363510	3427	0.03118	TRUE	2	1	TRUE
TD DN (CD4-CD8-) %T cell	rs9660907	C	T	C	T	0.2574	0.000320739	0.0629	0.04888	FALSE	FALSE	FALSE	ieu-b-4874	1	245039866	0.000322013	373295	0.32	bladder cancer	TRUE	NA	NA	NA	NA	NA	NA	NA	7.19e-07	1	245039866	3427	0.05184	TRUE	2	1	TRUE
TD DN (CD4-CD8-) AC	rs10003087	G	T	G	T	0.1291	1.86e-05	0.3766	0.405808	FALSE	FALSE	FALSE	ieu-b-4874	4	172937884	0.000137651	373295	0.89	bladder cancer	TRUE	NA	NA	NA	NA	NA	NA	NA	9.59e-07	4	172937884	3395	0.0263	TRUE	2	1	TRUE
TD DN (CD4-CD8-) AC	rs10422969	A	G	A	G	0.1742	0.000272332	0.1237	0.078107	FALSE	FALSE	FALSE	ieu-b-4874	19	30096708	0.000251512	373295	0.28	bladder cancer	TRUE	NA	NA	NA	NA	NA	NA	NA	5.91e-06	19	30096708	3395	0.03839	TRUE	2	1	TRUE
TD DN (CD4-CD8-) AC	rs114588192	T	C	T	C	0.3812	5.22e-05	0.0249	0.032318	FALSE	FALSE	FALSE	ieu-b-4874	5	146490228	0.000413677	373295	0.9	bladder cancer	TRUE	NA	NA	NA	NA	NA	NA	NA	2.28e-06	5	146490228	3395	0.08052	TRUE	2	1	TRUE
TD DN (CD4-CD8-) AC	rs117257206	A	G	A	G	0.2618	-0.000218885	0.0513	0.077324	FALSE	FALSE	FALSE	ieu-b-4874	8	120880964	0.000255297	373295	0.39	bladder cancer	TRUE	NA	NA	NA	NA	NA	NA	NA	5.91e-06	8	120880964	3395	0.05771	TRUE	2	1	TRUE
TD DN (CD4-CD8-) AC	rs142576649	C	T	C	T	0.37	-0.000641361	0.024	0.028525	FALSE	FALSE	FALSE	ieu-b-4874	12	130856799	0.000435316	373295	0.14	bladder cancer	TRUE	NA	NA	NA	NA	NA	NA	NA	7.51e-06	12	130856799	3395	0.08249	TRUE	2	1	TRUE
TD DN (CD4-CD8-) AC	rs17775026	A	G	A	G	0.1223	7.16e-05	0.3866	0.338898	FALSE	FALSE	FALSE	ieu-b-4874	16	26221619	0.000142936	373295	0.62	bladder cancer	TRUE	NA	NA	NA	NA	NA	NA	NA	2.19e-06	16	26221619	3395	0.0258	TRUE	2	1	TRUE
TD DN (CD4-CD8-) AC	rs1891587	T	C	T	C	0.1224	7.27e-05	0.458	0.494753	FALSE	FALSE	FALSE	ieu-b-4874	1	190077813	0.000135337	373295	0.59	bladder cancer	TRUE	NA	NA	NA	NA	NA	NA	NA	1.54e-06	1	190077813	3395	0.02543	TRUE	2	1	TRUE
TD DN (CD4-CD8-) AC	rs191991810	C	G	C	G	0.3859	-0.000297162	0.0424	0.067647	FALSE	TRUE	FALSE	ieu-b-4874	12	38160865	0.000296663	373295	0.32	bladder cancer	TRUE	NA	NA	NA	NA	NA	NA	NA	1.92e-06	12	38160865	3395	0.08091	TRUE	2	1	TRUE
TD DN (CD4-CD8-) AC	rs2242597	G	T	G	T	-0.2674	0.000188283	0.0505	0.028439	FALSE	FALSE	FALSE	ieu-b-4874	17	34245629	0.000412643	373295	0.649999	bladder cancer	TRUE	NA	NA	NA	NA	NA	NA	NA	3.11e-06	17	34245629	3395	0.05724	TRUE	2	1	TRUE
TD DN (CD4-CD8-) AC	rs36060603	G	A	G	A	0.1218	0.000151546	0.5203	0.431247	FALSE	FALSE	FALSE	ieu-b-4874	3	78637361	0.000136527	373295	0.27	bladder cancer	TRUE	NA	NA	NA	NA	NA	NA	NA	1.87e-06	3	78637361	3395	0.0255	TRUE	2	1	TRUE
TD DN (CD4-CD8-) AC	rs4497244	A	G	A	G	0.9668	0.000218214	0.0034	0.021007	FALSE	FALSE	FALSE	ieu-b-4874	1	197997953	0.000474376	373295	0.649999	bladder cancer	TRUE	NA	NA	NA	NA	NA	NA	NA	4.49e-06	1	197997953	3395	0.2104	TRUE	2	1	TRUE
TD DN (CD4-CD8-) AC	rs61126090	G	A	G	A	-0.2671	0.000395781	0.1973	0.012301	FALSE	FALSE	FALSE	ieu-b-4874	6	32586382	0.000687483	373295	0.56	bladder cancer	TRUE	NA	NA	NA	NA	NA	NA	NA	1.3e-12	6	32586382	3395	0.03751	TRUE	2	1	TRUE
TD DN (CD4-CD8-) AC	rs6431734	A	C	A	C	0.1405	-5.58e-06	0.7922	0.682065	FALSE	FALSE	FALSE	ieu-b-4874	2	15874207	0.000145282	373295	0.97	bladder cancer	TRUE	NA	NA	NA	NA	NA	NA	NA	7.92e-06	2	15874207	3395	0.03141	TRUE	2	1	TRUE
TD DN (CD4-CD8-) AC	rs6751481	C	T	C	T	0.115	-8.27e-05	0.4694	0.518483	FALSE	FALSE	FALSE	ieu-b-4874	2	38897810	0.000136781	373295	0.55	bladder cancer	TRUE	NA	NA	NA	NA	NA	NA	NA	6.72e-06	2	38897810	3395	0.02551	TRUE	2	1	TRUE
TD DN (CD4-CD8-) AC	rs6755452	G	T	G	T	0.1651	0.000137206	0.1895	0.252828	FALSE	FALSE	FALSE	ieu-b-4874	2	87035076	0.000157511	373295	0.38	bladder cancer	TRUE	NA	NA	NA	NA	NA	NA	NA	2.94e-07	2	87035076	3395	0.03214	TRUE	2	1	TRUE
TD DN (CD4-CD8-) AC	rs72731805	A	T	A	T	-0.2948	0.000162496	0.0368	0.050336	FALSE	TRUE	FALSE	ieu-b-4874	4	147420992	0.000310148	373295	0.6	bladder cancer	TRUE	TRUE	rs72731805	rs72731814	A	T	C	T	9.63e-06	4	147400930	3395	0.06653	TRUE	2	1	TRUE
TD DN (CD4-CD8-) AC	rs7744522	G	A	G	A	0.1133	8.21e-05	0.5859	0.699019	FALSE	FALSE	FALSE	ieu-b-4874	6	11109693	0.000147777	373295	0.58	bladder cancer	TRUE	NA	NA	NA	NA	NA	NA	NA	6.12e-06	6	11109693	3395	0.02501	TRUE	2	1	TRUE
TD DN (CD4-CD8-) AC	rs78513507	T	C	T	C	0.3442	-0.000881733	0.0286	0.036379	FALSE	FALSE	FALSE	ieu-b-4874	5	98468131	0.000367287	373295	0.016	bladder cancer	TRUE	NA	NA	NA	NA	NA	NA	NA	6.58e-06	5	98468131	3395	0.07624	TRUE	2	1	TRUE
TD DN (CD4-CD8-) AC	rs9461666	G	T	G	T	-0.2244	-6.19e-05	0.1133	0.022334	FALSE	FALSE	FALSE	ieu-b-4874	6	31207763	0.000457268	373295	0.89	bladder cancer	TRUE	NA	NA	NA	NA	NA	NA	NA	5.7e-06	6	31207763	3395	0.04937	TRUE	2	1	TRUE
TD DN (CD4-CD8-) AC	rs9660907	C	T	C	T	0.2323	0.000320739	0.0632	0.04888	FALSE	FALSE	FALSE	ieu-b-4874	1	245039866	0.000322013	373295	0.32	bladder cancer	TRUE	NA	NA	NA	NA	NA	NA	NA	6.3e-06	1	245039866	3395	0.05137	TRUE	2	1	TRUE
CD25 on CD45RA- CD4 not Treg	rs1000411	T	C	T	C	0.1341	0.00014715	0.2729	0.197799	FALSE	FALSE	FALSE	ieu-b-4874	20	39634616	0.000169919	373295	0.39	bladder cancer	TRUE	NA	NA	NA	NA	NA	NA	NA	4.96e-06	20	39634616	3435	0.02931	TRUE	2	1	TRUE
CD25 on CD45RA- CD4 not Treg	rs10509573	C	T	C	T	-0.1305	-0.000318758	0.262	0.205062	FALSE	FALSE	FALSE	ieu-b-4874	10	91189221	0.000168723	373295	0.0589997	bladder cancer	TRUE	NA	NA	NA	NA	NA	NA	NA	7.72e-06	10	91189221	3435	0.02914	TRUE	2	1	TRUE
CD25 on CD45RA- CD4 not Treg	rs116928928	C	T	C	T	-0.3318	0.000824659	0.0409	0.011586	FALSE	FALSE	FALSE	ieu-b-4874	11	32030595	0.000632086	373295	0.19	bladder cancer	TRUE	NA	NA	NA	NA	NA	NA	NA	4.52e-07	11	32030595	3435	0.06563	TRUE	2	1	TRUE
CD25 on CD45RA- CD4 not Treg	rs118110714	A	G	A	G	1.117	0.000128326	0.0031	0.027896	FALSE	FALSE	FALSE	ieu-b-4874	12	16060925	0.000410634	373295	0.75	bladder cancer	TRUE	NA	NA	NA	NA	NA	NA	NA	9.22e-07	12	16060925	3435	0.2272	TRUE	2	1	TRUE
CD25 on CD45RA- CD4 not Treg	rs139194198	G	A	G	A	0.4981	-0.000303321	0.013	0.023033	FALSE	FALSE	FALSE	ieu-b-4874	13	82921880	0.000472205	373295	0.52	bladder cancer	TRUE	NA	NA	NA	NA	NA	NA	NA	9.45e-06	13	82921880	3435	0.1123	TRUE	2	1	TRUE
CD25 on CD45RA- CD4 not Treg	rs139210967	G	A	G	A	2.576	0.00092529	0.0004	0.017875	FALSE	FALSE	FALSE	ieu-b-4874	1	157286941	0.000523685	373295	0.0769999	bladder cancer	TRUE	NA	NA	NA	NA	NA	NA	NA	5.83e-06	1	157286941	3435	0.5674	TRUE	2	1	TRUE
CD25 on CD45RA- CD4 not Treg	rs144239147	A	G	A	G	0.5126	-0.000184977	0.013	0.020763	FALSE	FALSE	FALSE	ieu-b-4874	17	48154668	0.000521601	373295	0.719999	bladder cancer	TRUE	NA	NA	NA	NA	NA	NA	NA	6.07e-06	17	48154668	3435	0.1131	TRUE	2	1	TRUE
CD25 on CD45RA- CD4 not Treg	rs149326960	G	T	G	T	-0.4159	0.000303203	0.0201	0.023787	FALSE	FALSE	FALSE	ieu-b-4874	3	21012581	0.000461078	373295	0.51	bladder cancer	TRUE	NA	NA	NA	NA	NA	NA	NA	5.53e-06	3	21012581	3435	0.09138	TRUE	2	1	TRUE
CD25 on CD45RA- CD4 not Treg	rs16884012	T	C	T	C	-1.603	9.04e-05	0.0013	0.014087	FALSE	FALSE	FALSE	ieu-b-4874	5	10034219	0.000591998	373295	0.88	bladder cancer	TRUE	NA	NA	NA	NA	NA	NA	NA	3.41e-06	5	10034219	3435	0.3446	TRUE	2	1	TRUE
CD25 on CD45RA- CD4 not Treg	rs175717	T	A	T	A	-0.1327	1.01e-05	0.7202	0.764194	FALSE	TRUE	FALSE	ieu-b-4874	14	75985604	0.000159662	373295	0.95	bladder cancer	TRUE	NA	NA	NA	NA	NA	NA	NA	2.36e-06	14	75985604	3435	0.02806	TRUE	2	1	TRUE
CD25 on CD45RA- CD4 not Treg	rs181516190	A	T	A	T	0.4995	-0.00019166	0.0223	0.010745	FALSE	TRUE	FALSE	ieu-b-4874	7	35264731	0.000677222	373295	0.780001	bladder cancer	TRUE	NA	NA	NA	NA	NA	NA	NA	8.3e-09	7	35264731	3435	0.08646	TRUE	2	1	TRUE
CD25 on CD45RA- CD4 not Treg	rs181741769	C	T	C	T	1.229	0.000391384	0.002	0.01442	FALSE	FALSE	FALSE	ieu-b-4874	1	26999658	0.000597888	373295	0.51	bladder cancer	TRUE	NA	NA	NA	NA	NA	NA	NA	6.33e-06	1	26999658	3435	0.2718	TRUE	2	1	TRUE
CD25 on CD45RA- CD4 not Treg	rs35894198	A	G	A	G	0.1808	-0.000135326	0.1259	0.143596	FALSE	FALSE	FALSE	ieu-b-4874	2	9361836	0.000195454	373295	0.49	bladder cancer	TRUE	NA	NA	NA	NA	NA	NA	NA	2.61e-06	2	9361836	3435	0.0384	TRUE	2	1	TRUE
CD25 on CD45RA- CD4 not Treg	rs4075635	G	A	G	A	-0.1156	0.000173219	0.4515	0.263189	FALSE	FALSE	FALSE	ieu-b-4874	11	28511643	0.000153941	373295	0.26	bladder cancer	TRUE	NA	NA	NA	NA	NA	NA	NA	6.42e-06	11	28511643	3435	0.02558	TRUE	2	1	TRUE
CD25 on CD45RA- CD4 not Treg	rs4080481	A	C	A	C	0.1326	-2.82e-06	0.3738	0.279236	FALSE	FALSE	FALSE	ieu-b-4874	22	37905285	0.000151457	373295	0.99	bladder cancer	TRUE	NA	NA	NA	NA	NA	NA	NA	5.76e-07	22	37905285	3435	0.02647	TRUE	2	1	TRUE
CD25 on CD45RA- CD4 not Treg	rs4669451	C	T	C	T	0.1396	-0.000131664	0.7378	0.74566	FALSE	FALSE	FALSE	ieu-b-4874	2	9898172	0.000156314	373295	0.4	bladder cancer	TRUE	NA	NA	NA	NA	NA	NA	NA	1.38e-06	2	9898172	3435	0.02887	TRUE	2	1	TRUE
CD25 on CD45RA- CD4 not Treg	rs61839660	T	C	T	C	0.6113	0.000384627	0.0544	0.097919	FALSE	FALSE	FALSE	ieu-b-4874	10	6094697	0.000227458	373295	0.0909997	bladder cancer	TRUE	NA	NA	NA	NA	NA	NA	NA	6.7e-28	10	6094697	3435	0.05534	TRUE	2	1	TRUE
CD25 on CD45RA- CD4 not Treg	rs62626343	G	C	G	C	0.1385	-4.97e-05	0.2132	0.111876	FALSE	TRUE	FALSE	ieu-b-4874	10	6128374	0.000217648	373295	0.82	bladder cancer	TRUE	NA	NA	NA	NA	NA	NA	NA	7.96e-06	10	6128374	3435	0.03097	TRUE	2	1	TRUE
CD25 on CD45RA- CD4 not Treg	rs67403544	A	G	A	G	0.4626	-0.000389817	0.0167	0.042603	FALSE	FALSE	FALSE	ieu-b-4874	4	21653587	0.000345995	373295	0.26	bladder cancer	TRUE	NA	NA	NA	NA	NA	NA	NA	2.47e-06	4	21653587	3435	0.09804	TRUE	2	1	TRUE
CD25 on CD45RA- CD4 not Treg	rs7406899	G	A	G	A	0.195	-0.000349868	0.8771	0.957495	FALSE	FALSE	FALSE	ieu-b-4874	17	39766504	0.000335708	373295	0.3	bladder cancer	TRUE	NA	NA	NA	NA	NA	NA	NA	6.5e-07	17	39766504	3435	0.03913	TRUE	2	1	TRUE
CD25 on CD45RA- CD4 not Treg	rs74553250	T	C	T	C	-0.2023	-0.000311175	0.1134	0.026735	FALSE	FALSE	FALSE	ieu-b-4874	17	40063525	0.000438311	373295	0.48	bladder cancer	TRUE	NA	NA	NA	NA	NA	NA	NA	6.42e-07	17	40063525	3435	0.04055	TRUE	2	1	TRUE
CD25 on CD45RA- CD4 not Treg	rs79062365	C	T	C	T	0.4552	-0.000125569	0.0167	0.025021	FALSE	FALSE	FALSE	ieu-b-4874	8	82262167	0.000468445	373295	0.79	bladder cancer	TRUE	NA	NA	NA	NA	NA	NA	NA	2.55e-06	8	82262167	3435	0.09661	TRUE	2	1	TRUE
CD25 on CD45RA- CD4 not Treg	rs80026829	A	G	A	G	1.015	0.000228072	0.0029	0.033697	FALSE	FALSE	FALSE	ieu-b-4874	7	8618736	0.000374891	373295	0.54	bladder cancer	TRUE	NA	NA	NA	NA	NA	NA	NA	8.79e-06	7	8618736	3435	0.2281	TRUE	2	1	TRUE
CD25 on CD45RA- CD4 not Treg	rs9480540	G	A	G	A	0.8126	-0.000134155	0.0047	0.082295	FALSE	FALSE	FALSE	ieu-b-4874	6	151021074	0.000246308	373295	0.59	bladder cancer	TRUE	NA	NA	NA	NA	NA	NA	NA	9.71e-06	6	151021074	3435	0.1834	TRUE	2	1	TRUE
HVEM on T cell	rs10008912	G	A	G	A	0.1962	0.000165974	0.5754	0.456701	FALSE	FALSE	FALSE	ieu-b-4874	4	7148069	0.000144538	373295	0.25	bladder cancer	TRUE	NA	NA	NA	NA	NA	NA	NA	3.92e-06	4	7148069	1247	0.04231	TRUE	2	1	TRUE
HVEM on T cell	rs10747856	G	A	G	A	0.1824	-0.000110032	0.5225	0.479788	FALSE	FALSE	FALSE	ieu-b-4874	12	60262116	0.000136117	373295	0.42	bladder cancer	TRUE	NA	NA	NA	NA	NA	NA	NA	5.98e-06	12	60262116	1247	0.04013	TRUE	2	1	TRUE
HVEM on T cell	rs114178658	G	A	G	A	0.2853	-0.000290391	0.1091	0.055299	FALSE	FALSE	FALSE	ieu-b-4874	4	35188325	0.000297814	373295	0.33	bladder cancer	TRUE	NA	NA	NA	NA	NA	NA	NA	8.84e-06	4	35188325	1247	0.06394	TRUE	2	1	TRUE
HVEM on T cell	rs116783256	T	C	T	C	0.295	0.000277119	0.1127	0.067826	FALSE	FALSE	FALSE	ieu-b-4874	2	209940257	0.000274922	373295	0.31	bladder cancer	TRUE	NA	NA	NA	NA	NA	NA	NA	8.89e-06	2	209940257	1247	0.06613	TRUE	2	1	TRUE
HVEM on T cell	rs12284339	A	G	A	G	-1.363	-0.000548525	0.0048	0.030762	FALSE	FALSE	FALSE	ieu-b-4874	11	107699559	0.000394172	373295	0.16	bladder cancer	TRUE	NA	NA	NA	NA	NA	NA	NA	3.3e-06	11	107699559	1247	0.2918	TRUE	2	1	TRUE
HVEM on T cell	rs12818999	A	G	A	G	0.4837	0.000219706	0.0365	0.050687	FALSE	FALSE	FALSE	ieu-b-4874	12	5144242	0.000312059	373295	0.48	bladder cancer	TRUE	TRUE	rs12818999	rs12810130	A	G	A	G	5.6e-06	12	5133216	1247	0.106	TRUE	2	1	TRUE
HVEM on T cell	rs13014690	A	C	A	C	0.2167	0.000113685	0.2686	0.227004	FALSE	FALSE	FALSE	ieu-b-4874	2	153797694	0.000174991	373295	0.52	bladder cancer	TRUE	NA	NA	NA	NA	NA	NA	NA	2.91e-06	2	153797694	1247	0.04612	TRUE	2	1	TRUE
HVEM on T cell	rs140639767	A	C	A	C	-0.7914	-0.000682011	0.0124	0.011031	FALSE	FALSE	FALSE	ieu-b-4874	1	146998040	0.000689284	373295	0.32	bladder cancer	TRUE	NA	NA	NA	NA	NA	NA	NA	9.67e-06	1	146998040	1247	0.1781	TRUE	2	1	TRUE
HVEM on T cell	rs1499672	G	A	G	A	-0.194	5.02e-05	0.5978	0.495012	FALSE	FALSE	FALSE	ieu-b-4874	1	56037629	0.000135609	373295	0.709999	bladder cancer	TRUE	NA	NA	NA	NA	NA	NA	NA	4.48e-06	1	56037629	1247	0.04209	TRUE	2	1	TRUE
HVEM on T cell	rs1552721	C	G	C	G	-0.4352	6.23e-05	0.0497	0.064531	FALSE	TRUE	FALSE	ieu-b-4874	11	7000368	0.000274605	373295	0.82	bladder cancer	TRUE	NA	NA	NA	NA	NA	NA	NA	4.52e-06	11	7000368	1247	0.09448	TRUE	2	1	TRUE
HVEM on T cell	rs1886730	C	T	C	T	0.2864	4.06e-05	0.5778	0.500501	FALSE	FALSE	FALSE	ieu-b-4874	1	2488608	0.000136366	373295	0.77	bladder cancer	TRUE	NA	NA	NA	NA	NA	NA	NA	7e-13	1	2488608	1247	0.03948	TRUE	2	1	TRUE
HVEM on T cell	rs2246952	G	A	G	A	0.279	-0.000303739	0.1371	0.101484	FALSE	FALSE	FALSE	ieu-b-4874	10	70782592	0.000224445	373295	0.18	bladder cancer	TRUE	NA	NA	NA	NA	NA	NA	NA	1.85e-06	10	70782592	1247	0.05822	TRUE	2	1	TRUE
HVEM on T cell	rs2731518	A	G	A	G	0.1923	0.000200216	0.6135	0.573795	FALSE	FALSE	FALSE	ieu-b-4874	3	1896695	0.00013676	373295	0.14	bladder cancer	TRUE	NA	NA	NA	NA	NA	NA	NA	9.23e-06	3	1896695	1247	0.04318	TRUE	2	1	TRUE
HVEM on T cell	rs3138035	T	C	T	C	0.2134	-0.000172233	0.2979	0.362752	FALSE	FALSE	FALSE	ieu-b-4874	17	32645949	0.000140442	373295	0.22	bladder cancer	TRUE	NA	NA	NA	NA	NA	NA	NA	1.42e-06	17	32645949	1247	0.04403	TRUE	2	1	TRUE
HVEM on T cell	rs313856	C	T	C	T	0.2265	-1.3e-05	0.7522	0.814629	FALSE	FALSE	FALSE	ieu-b-4874	19	47298263	0.000178008	373295	0.94	bladder cancer	TRUE	NA	NA	NA	NA	NA	NA	NA	2.36e-06	19	47298263	1247	0.04776	TRUE	2	1	TRUE
HVEM on T cell	rs62140870	G	A	G	A	-0.6421	6.93e-05	0.02	0.025719	FALSE	FALSE	FALSE	ieu-b-4874	2	47713921	0.000431311	373295	0.87	bladder cancer	TRUE	NA	NA	NA	NA	NA	NA	NA	8.82e-06	2	47713921	1247	0.1439	TRUE	2	1	TRUE
HVEM on T cell	rs6577804	C	T	C	T	-0.1933	3.25e-05	0.3741	0.432438	FALSE	FALSE	FALSE	ieu-b-4874	8	138522864	0.000136729	373295	0.81	bladder cancer	TRUE	NA	NA	NA	NA	NA	NA	NA	6.1e-06	8	138522864	1247	0.04255	TRUE	2	1	TRUE
HVEM on T cell	rs73049692	C	T	C	T	-0.3789	-0.00040474	0.0593	0.051335	FALSE	FALSE	FALSE	ieu-b-4874	19	51995348	0.000313621	373295	0.2	bladder cancer	TRUE	NA	NA	NA	NA	NA	NA	NA	7.32e-06	19	51995348	1247	0.08413	TRUE	2	1	TRUE
HVEM on T cell	rs73227426	T	C	T	C	0.9814	-2.82e-05	0.0084	0.064962	FALSE	FALSE	FALSE	ieu-b-4874	3	112068503	0.000275717	373295	0.92	bladder cancer	TRUE	NA	NA	NA	NA	NA	NA	NA	8.57e-06	3	112068503	1247	0.2196	TRUE	2	1	TRUE
HVEM on T cell	rs73449242	T	C	T	C	0.2877	0.000195787	0.1239	0.065497	FALSE	FALSE	FALSE	ieu-b-4874	13	24033981	0.000274135	373295	0.48	bladder cancer	TRUE	NA	NA	NA	NA	NA	NA	NA	4.45e-06	13	24033981	1247	0.06242	TRUE	2	1	TRUE
HVEM on T cell	rs7731342	T	C	T	C	0.3429	-8.62e-06	0.0798	0.108167	FALSE	FALSE	FALSE	ieu-b-4874	5	104549911	0.000217756	373295	0.97	bladder cancer	TRUE	NA	NA	NA	NA	NA	NA	NA	7.58e-06	5	104549911	1247	0.07627	TRUE	2	1	TRUE
HVEM on T cell	rs7738988	A	C	A	C	0.2264	0.000147062	0.751	0.739807	FALSE	FALSE	FALSE	ieu-b-4874	6	83760703	0.000154156	373295	0.34	bladder cancer	TRUE	NA	NA	NA	NA	NA	NA	NA	1.74e-06	6	83760703	1247	0.04713	TRUE	2	1	TRUE
HVEM on T cell	rs78389375	T	C	T	C	-0.5153	0.00060741	0.0357	0.013576	FALSE	FALSE	FALSE	ieu-b-4874	7	81160961	0.000583843	373295	0.3	bladder cancer	TRUE	NA	NA	NA	NA	NA	NA	NA	2.25e-06	7	81160961	1247	0.1084	TRUE	2	1	TRUE
HVEM on T cell	rs79388518	C	T	C	T	-0.5518	-0.000101855	0.0329	0.013901	FALSE	FALSE	FALSE	ieu-b-4874	18	1705002	0.000593355	373295	0.86	bladder cancer	TRUE	NA	NA	NA	NA	NA	NA	NA	3.8e-06	18	1705002	1247	0.1189	TRUE	2	1	TRUE
HVEM on T cell	rs9870329	T	C	T	C	0.4262	-0.000212715	0.0541	0.044017	FALSE	FALSE	FALSE	ieu-b-4874	3	126102109	0.000333154	373295	0.52	bladder cancer	TRUE	NA	NA	NA	NA	NA	NA	NA	7.62e-06	3	126102109	1247	0.09482	TRUE	2	1	TRUE
CX3CR1 on CD14+ CD16+ monocyte	rs10011142	T	C	T	C	-0.1374	0.000352007	0.1991	0.150725	FALSE	FALSE	FALSE	ieu-b-4874	4	5015486	0.00020133	373295	0.08	bladder cancer	TRUE	NA	NA	NA	NA	NA	NA	NA	9.37e-06	4	5015486	3579	0.03097	TRUE	2	1	TRUE
CX3CR1 on CD14+ CD16+ monocyte	rs112450242	T	C	T	C	-1.107	-3.21e-06	0.0035	0.055629	FALSE	FALSE	FALSE	ieu-b-4874	17	75274660	0.000296796	373295	0.99	bladder cancer	TRUE	TRUE	rs112450242	rs11652647	T	C	G	A	4.09e-06	17	75272996	3579	0.2399	TRUE	2	1	TRUE
CX3CR1 on CD14+ CD16+ monocyte	rs117043578	T	C	T	C	2.527	0.00059237	0.0004	0.013307	FALSE	FALSE	FALSE	ieu-b-4874	13	104381481	0.000588928	373295	0.31	bladder cancer	TRUE	NA	NA	NA	NA	NA	NA	NA	9.91e-06	13	104381481	3579	0.5709	TRUE	2	1	TRUE
CX3CR1 on CD14+ CD16+ monocyte	rs11768517	T	G	T	G	0.1326	-4.07e-05	0.3061	0.336907	FALSE	FALSE	FALSE	ieu-b-4874	7	54919768	0.000143929	373295	0.780001	bladder cancer	TRUE	NA	NA	NA	NA	NA	NA	NA	8.75e-07	7	54919768	3579	0.02691	TRUE	2	1	TRUE
CX3CR1 on CD14+ CD16+ monocyte	rs117871360	G	A	G	A	-0.7288	-0.000386892	0.0056	0.03262	FALSE	FALSE	FALSE	ieu-b-4874	8	3690065	0.000385337	373295	0.32	bladder cancer	TRUE	NA	NA	NA	NA	NA	NA	NA	8.47e-06	8	3690065	3579	0.1634	TRUE	2	1	TRUE
CX3CR1 on CD14+ CD16+ monocyte	rs117896307	C	T	C	T	-0.257	-7.05e-05	0.0499	0.049947	FALSE	FALSE	FALSE	ieu-b-4874	18	70433020	0.000321125	373295	0.83	bladder cancer	TRUE	NA	NA	NA	NA	NA	NA	NA	8.36e-06	18	70433020	3579	0.0576	TRUE	2	1	TRUE
CX3CR1 on CD14+ CD16+ monocyte	rs117940302	A	G	A	G	0.4039	0.00017694	0.0226	0.023514	FALSE	FALSE	FALSE	ieu-b-4874	8	123834904	0.000446085	373295	0.69	bladder cancer	TRUE	NA	NA	NA	NA	NA	NA	NA	2.28e-06	8	123834904	3579	0.08531	TRUE	2	1	TRUE
CX3CR1 on CD14+ CD16+ monocyte	rs1376624	C	T	C	T	0.1412	0.000123663	0.2161	0.266732	FALSE	FALSE	FALSE	ieu-b-4874	2	187771135	0.000154067	373295	0.42	bladder cancer	TRUE	NA	NA	NA	NA	NA	NA	NA	3.9e-06	2	187771135	3579	0.03053	TRUE	2	1	TRUE
CX3CR1 on CD14+ CD16+ monocyte	rs143002526	A	T	A	T	-0.55	-0.000591226	0.0133	0.020939	FALSE	TRUE	FALSE	ieu-b-4874	3	184649632	0.000499593	373295	0.24	bladder cancer	TRUE	NA	NA	NA	NA	NA	NA	NA	1.1e-06	3	184649632	3579	0.1127	TRUE	2	1	TRUE
CX3CR1 on CD14+ CD16+ monocyte	rs148057702	T	C	T	C	-0.3442	0.000349123	0.0305	0.030897	FALSE	FALSE	FALSE	ieu-b-4874	7	97552526	0.000392659	373295	0.37	bladder cancer	TRUE	NA	NA	NA	NA	NA	NA	NA	4.01e-06	7	97552526	3579	0.07454	TRUE	2	1	TRUE
CX3CR1 on CD14+ CD16+ monocyte	rs149100	G	T	G	T	-0.1347	3.73e-05	0.4225	0.380359	FALSE	FALSE	FALSE	ieu-b-4874	1	162441037	0.000139332	373295	0.79	bladder cancer	TRUE	NA	NA	NA	NA	NA	NA	NA	8.49e-08	1	162441037	3579	0.0251	TRUE	2	1	TRUE
CX3CR1 on CD14+ CD16+ monocyte	rs16843658	T	C	T	C	-0.3609	-4.79e-05	0.0309	0.023302	FALSE	FALSE	FALSE	ieu-b-4874	1	162672134	0.000451344	373295	0.92	bladder cancer	TRUE	NA	NA	NA	NA	NA	NA	NA	1.01e-06	1	162672134	3579	0.07369	TRUE	2	1	TRUE
CX3CR1 on CD14+ CD16+ monocyte	rs16867973	G	A	G	A	0.1506	-3.88e-05	0.165	0.148987	FALSE	FALSE	FALSE	ieu-b-4874	8	102610279	0.000190517	373295	0.84	bladder cancer	TRUE	NA	NA	NA	NA	NA	NA	NA	8.3e-06	8	102610279	3579	0.03374	TRUE	2	1	TRUE
CX3CR1 on CD14+ CD16+ monocyte	rs17095454	C	T	C	T	-1.15	-0.000877648	0.0029	0.013432	FALSE	FALSE	FALSE	ieu-b-4874	10	113333619	0.000628635	373295	0.16	bladder cancer	TRUE	NA	NA	NA	NA	NA	NA	NA	3.15e-07	10	113333619	3579	0.2244	TRUE	2	1	TRUE
CX3CR1 on CD14+ CD16+ monocyte	rs17549676	A	G	A	G	-0.1916	-5.2e-05	0.0928	0.100372	FALSE	FALSE	FALSE	ieu-b-4874	16	63344732	0.000224426	373295	0.82	bladder cancer	TRUE	NA	NA	NA	NA	NA	NA	NA	7.84e-06	16	63344732	3579	0.04281	TRUE	2	1	TRUE
CX3CR1 on CD14+ CD16+ monocyte	rs1801274	G	A	G	A	-0.4628	-0.000227068	0.327	0.529944	FALSE	FALSE	FALSE	ieu-b-4874	1	161479745	0.000135565	373295	0.0940005	bladder cancer	TRUE	NA	NA	NA	NA	NA	NA	NA	2.62e-69	1	161479745	3579	0.02573	TRUE	2	1	TRUE
CX3CR1 on CD14+ CD16+ monocyte	rs182244806	T	C	T	C	-0.7264	0.000230569	0.0056	0.029835	FALSE	FALSE	FALSE	ieu-b-4874	15	68651749	0.000404112	373295	0.57	bladder cancer	TRUE	NA	NA	NA	NA	NA	NA	NA	6.93e-06	15	68651749	3579	0.1613	TRUE	2	1	TRUE
CX3CR1 on CD14+ CD16+ monocyte	rs2649752	A	C	A	C	0.1581	-0.00016751	0.2677	0.341161	FALSE	FALSE	FALSE	ieu-b-4874	3	39351805	0.000143141	373295	0.24	bladder cancer	TRUE	NA	NA	NA	NA	NA	NA	NA	3.51e-08	3	39351805	3579	0.02862	TRUE	2	1	TRUE
CX3CR1 on CD14+ CD16+ monocyte	rs28491136	T	C	T	C	-0.1603	5.26e-05	0.1442	0.215373	FALSE	FALSE	FALSE	ieu-b-4874	3	106964051	0.000165627	373295	0.75	bladder cancer	TRUE	NA	NA	NA	NA	NA	NA	NA	7.18e-06	3	106964051	3579	0.03567	TRUE	2	1	TRUE
CX3CR1 on CD14+ CD16+ monocyte	rs372655475	T	G	T	G	-0.2806	-0.000155973	0.0426	0.056446	FALSE	FALSE	FALSE	ieu-b-4874	6	68886782	0.000300572	373295	0.6	bladder cancer	TRUE	NA	NA	NA	NA	NA	NA	NA	9.19e-06	6	68886782	3579	0.06317	TRUE	2	1	TRUE
CX3CR1 on CD14+ CD16+ monocyte	rs4957969	G	A	G	A	-0.2538	-0.000700425	0.9389	0.927506	FALSE	FALSE	FALSE	ieu-b-4874	5	110958260	0.000261177	373295	0.00729995	bladder cancer	TRUE	NA	NA	NA	NA	NA	NA	NA	2.1e-06	5	110958260	3579	0.05341	TRUE	2	1	TRUE
CX3CR1 on CD14+ CD16+ monocyte	rs58215329	T	C	T	C	0.1816	3.24e-05	0.1157	0.07378	FALSE	FALSE	FALSE	ieu-b-4874	3	196465812	0.000259915	373295	0.9	bladder cancer	TRUE	NA	NA	NA	NA	NA	NA	NA	3.44e-06	3	196465812	3579	0.03906	TRUE	2	1	TRUE
CX3CR1 on CD14+ CD16+ monocyte	rs62170788	T	C	T	C	-0.2816	-0.000430749	0.0418	0.091317	FALSE	FALSE	FALSE	ieu-b-4874	2	170960026	0.000236194	373295	0.0680002	bladder cancer	TRUE	TRUE	rs62170788	rs10202538	T	C	A	G	4.93e-06	2	170958389	3579	0.06155	TRUE	2	1	TRUE
CX3CR1 on CD14+ CD16+ monocyte	rs6952061	T	C	T	C	0.2141	-0.000288354	0.0745	0.0488	FALSE	FALSE	FALSE	ieu-b-4874	7	30459852	0.000317596	373295	0.36	bladder cancer	TRUE	NA	NA	NA	NA	NA	NA	NA	8.18e-06	7	30459852	3579	0.04792	TRUE	2	1	TRUE
CX3CR1 on CD14+ CD16+ monocyte	rs74574092	C	T	C	T	0.2025	-0.000332269	0.0915	0.074682	FALSE	FALSE	FALSE	ieu-b-4874	11	100513751	0.000259786	373295	0.2	bladder cancer	TRUE	NA	NA	NA	NA	NA	NA	NA	2.68e-06	11	100513751	3579	0.04307	TRUE	2	1	TRUE
CX3CR1 on CD14+ CD16+ monocyte	rs7791415	T	C	T	C	-0.4614	-0.000106232	0.0166	0.043296	FALSE	FALSE	FALSE	ieu-b-4874	7	44433778	0.00033622	373295	0.75	bladder cancer	TRUE	NA	NA	NA	NA	NA	NA	NA	1.69e-06	7	44433778	3579	0.0962	TRUE	2	1	TRUE
CX3CR1 on CD14+ CD16+ monocyte	rs894107	C	T	C	T	0.1991	-2.36e-05	0.1167	0.206001	FALSE	FALSE	FALSE	ieu-b-4874	11	71019939	0.000168144	373295	0.89	bladder cancer	TRUE	NA	NA	NA	NA	NA	NA	NA	3.41e-07	11	71019939	3579	0.03898	TRUE	2	1	TRUE
CX3CR1 on CD14+ CD16+ monocyte	rs9542786	C	A	C	A	-0.2675	0.000142878	0.95	0.926519	FALSE	FALSE	FALSE	ieu-b-4874	13	72514633	0.00026257	373295	0.59	bladder cancer	TRUE	NA	NA	NA	NA	NA	NA	NA	2.94e-06	13	72514633	3579	0.05713	TRUE	2	1	TRUE
CX3CR1 on CD14+ CD16+ monocyte	rs9823718	G	C	G	C	-0.3271	0.000354356	0.132	0.082923	FALSE	TRUE	FALSE	ieu-b-4874	3	39293757	0.00024606	373295	0.15	bladder cancer	TRUE	NA	NA	NA	NA	NA	NA	NA	5.15e-19	3	39293757	3579	0.03651	TRUE	2	1	TRUE
CD33dim HLA DR+ CD11b+ AC	rs10011663	G	A	G	A	0.1837	-0.000103118	0.2411	0.350515	FALSE	FALSE	FALSE	ieu-b-4874	4	190338080	0.000141865	373295	0.47	bladder cancer	TRUE	NA	NA	NA	NA	NA	NA	NA	1.3e-06	4	190338080	1858	0.03783	TRUE	2	1	TRUE
CD33dim HLA DR+ CD11b+ AC	rs10025005	T	G	T	G	0.1934	-0.000129509	0.7764	0.853943	FALSE	FALSE	FALSE	ieu-b-4874	4	181288587	0.000193456	373295	0.5	bladder cancer	TRUE	NA	NA	NA	NA	NA	NA	NA	5.86e-07	4	181288587	1858	0.03857	TRUE	2	1	TRUE
CD33dim HLA DR+ CD11b+ AC	rs11594395	G	C	G	C	0.514	-0.000326785	0.024	0.031362	FALSE	TRUE	FALSE	ieu-b-4874	10	2817998	0.000387866	373295	0.4	bladder cancer	TRUE	NA	NA	NA	NA	NA	NA	NA	3.94e-06	10	2817998	1858	0.1111	TRUE	2	1	TRUE
CD33dim HLA DR+ CD11b+ AC	rs11709025	T	C	T	C	0.1544	0.000219398	0.3149	0.293398	FALSE	FALSE	FALSE	ieu-b-4874	3	177439366	0.000149138	373295	0.14	bladder cancer	TRUE	NA	NA	NA	NA	NA	NA	NA	8.78e-06	3	177439366	1858	0.03464	TRUE	2	1	TRUE
CD33dim HLA DR+ CD11b+ AC	rs1201940	C	T	C	T	-0.1483	-3.16e-05	0.5073	0.528492	FALSE	FALSE	FALSE	ieu-b-4874	20	59281507	0.000135468	373295	0.82	bladder cancer	TRUE	NA	NA	NA	NA	NA	NA	NA	5.33e-06	20	59281507	1858	0.03248	TRUE	2	1	TRUE
CD33dim HLA DR+ CD11b+ AC	rs141080550	A	G	A	G	0.4746	0.000481731	0.0307	0.025906	FALSE	FALSE	FALSE	ieu-b-4874	13	111287945	0.000442096	373295	0.28	bladder cancer	TRUE	NA	NA	NA	NA	NA	NA	NA	3.41e-07	13	111287945	1858	0.09273	TRUE	2	1	TRUE
CD33dim HLA DR+ CD11b+ AC	rs143383466	T	C	T	C	1.142	-0.000496987	0.0043	0.028903	FALSE	FALSE	FALSE	ieu-b-4874	3	196068066	0.000410991	373295	0.23	bladder cancer	TRUE	NA	NA	NA	NA	NA	NA	NA	3.9e-06	3	196068066	1858	0.2466	TRUE	2	1	TRUE
CD33dim HLA DR+ CD11b+ AC	rs144894656	C	A	C	A	-0.7728	-0.000417545	0.0094	0.015817	FALSE	FALSE	FALSE	ieu-b-4874	9	118222268	0.000541987	373295	0.44	bladder cancer	TRUE	NA	NA	NA	NA	NA	NA	NA	3.78e-06	9	118222268	1858	0.1667	TRUE	2	1	TRUE
CD33dim HLA DR+ CD11b+ AC	rs145231100	A	G	A	G	-0.6579	-0.00127109	0.0137	0.012525	FALSE	FALSE	FALSE	ieu-b-4874	18	33141890	0.000633653	373295	0.0449997	bladder cancer	TRUE	NA	NA	NA	NA	NA	NA	NA	1.28e-06	18	33141890	1858	0.1354	TRUE	2	1	TRUE
CD33dim HLA DR+ CD11b+ AC	rs148937000	T	G	T	G	1.666	-0.000286948	0.0019	0.010113	FALSE	FALSE	FALSE	ieu-b-4874	1	94437964	0.000720382	373295	0.69	bladder cancer	TRUE	NA	NA	NA	NA	NA	NA	NA	9.66e-06	1	94437964	1858	0.3755	TRUE	2	1	TRUE
CD33dim HLA DR+ CD11b+ AC	rs17721845	T	C	T	C	0.1862	-5.76e-05	0.2511	0.255749	FALSE	FALSE	FALSE	ieu-b-4874	6	149234718	0.000155236	373295	0.709999	bladder cancer	TRUE	NA	NA	NA	NA	NA	NA	NA	7.68e-07	6	149234718	1858	0.03754	TRUE	2	1	TRUE
CD33dim HLA DR+ CD11b+ AC	rs1801274	G	A	G	A	0.2617	-0.000227068	0.3334	0.529944	FALSE	FALSE	FALSE	ieu-b-4874	1	161479745	0.000135565	373295	0.0940005	bladder cancer	TRUE	NA	NA	NA	NA	NA	NA	NA	8.34e-14	1	161479745	1858	0.03479	TRUE	2	1	TRUE
CD33dim HLA DR+ CD11b+ AC	rs2868992	G	T	G	T	-0.205	-7.41e-05	0.1502	0.242744	FALSE	FALSE	FALSE	ieu-b-4874	2	56232555	0.000158536	373295	0.64	bladder cancer	TRUE	NA	NA	NA	NA	NA	NA	NA	7.14e-06	2	56232555	1858	0.04553	TRUE	2	1	TRUE
CD33dim HLA DR+ CD11b+ AC	rs4606283	T	C	T	C	0.1686	-8.2e-05	0.7274	0.704413	FALSE	FALSE	FALSE	ieu-b-4874	1	227581017	0.00014836	373295	0.58	bladder cancer	TRUE	NA	NA	NA	NA	NA	NA	NA	4.71e-06	1	227581017	1858	0.03672	TRUE	2	1	TRUE
CD33dim HLA DR+ CD11b+ AC	rs62146115	G	A	G	A	-0.2861	3.03e-05	0.0753	0.048854	FALSE	FALSE	FALSE	ieu-b-4874	2	95456961	0.000326327	373295	0.93	bladder cancer	TRUE	NA	NA	NA	NA	NA	NA	NA	5.16e-06	2	95456961	1858	0.06259	TRUE	2	1	TRUE
CD33dim HLA DR+ CD11b+ AC	rs62362950	T	C	T	C	-0.3383	9.81e-07	0.0597	0.086826	FALSE	FALSE	FALSE	ieu-b-4874	5	83003910	0.000240862	373295	1	bladder cancer	TRUE	NA	NA	NA	NA	NA	NA	NA	6.87e-07	5	83003910	1858	0.0679	TRUE	2	1	TRUE
CD33dim HLA DR+ CD11b+ AC	rs71596080	C	T	C	T	0.2853	-0.000418149	0.0826	0.077121	FALSE	FALSE	FALSE	ieu-b-4874	4	82676237	0.000254807	373295	0.1	bladder cancer	TRUE	NA	NA	NA	NA	NA	NA	NA	1.12e-06	4	82676237	1858	0.0584	TRUE	2	1	TRUE
CD33dim HLA DR+ CD11b+ AC	rs73716755	C	G	C	G	-0.3748	-0.000218023	0.0455	0.045364	FALSE	TRUE	FALSE	ieu-b-4874	7	116308013	0.000326756	373295	0.5	bladder cancer	TRUE	NA	NA	NA	NA	NA	NA	NA	1.68e-06	7	116308013	1858	0.078	TRUE	2	1	TRUE
CD33dim HLA DR+ CD11b+ AC	rs74638799	G	A	G	A	0.2768	2.94e-05	0.0797	0.084331	FALSE	FALSE	FALSE	ieu-b-4874	12	11652069	0.000250783	373295	0.91	bladder cancer	TRUE	NA	NA	NA	NA	NA	NA	NA	3.81e-06	12	11652069	1858	0.05971	TRUE	2	1	TRUE
CD33dim HLA DR+ CD11b+ AC	rs74851637	T	G	T	G	0.8135	0.000605618	0.0091	0.037184	FALSE	FALSE	FALSE	ieu-b-4874	5	144893255	0.000379565	373295	0.11	bladder cancer	TRUE	NA	NA	NA	NA	NA	NA	NA	2.61e-06	5	144893255	1858	0.1725	TRUE	2	1	TRUE
CD33dim HLA DR+ CD11b+ AC	rs76640602	A	G	A	G	0.5875	6.53e-05	0.0202	0.018212	FALSE	FALSE	FALSE	ieu-b-4874	22	39737217	0.00051521	373295	0.9	bladder cancer	TRUE	NA	NA	NA	NA	NA	NA	NA	3.95e-07	22	39737217	1858	0.1154	TRUE	2	1	TRUE
CD33dim HLA DR+ CD11b+ AC	rs78173101	G	C	G	C	-0.5888	0.0002915	0.0167	0.049939	FALSE	TRUE	FALSE	ieu-b-4874	5	148830537	0.000313585	373295	0.35	bladder cancer	TRUE	NA	NA	NA	NA	NA	NA	NA	3.69e-06	5	148830537	1858	0.1268	TRUE	2	1	TRUE
CD33dim HLA DR+ CD11b+ AC	rs9510371	T	C	T	C	0.2146	1.91e-05	0.158	0.24236	FALSE	FALSE	FALSE	ieu-b-4874	13	23410009	0.000158022	373295	0.9	bladder cancer	TRUE	NA	NA	NA	NA	NA	NA	NA	2.13e-06	13	23410009	1858	0.04513	TRUE	2	1	TRUE
CD33dim HLA DR+ CD11b+ AC	rs9524403	C	T	C	T	1.043	0.000135341	0.0057	0.021055	FALSE	FALSE	FALSE	ieu-b-4874	13	94940936	0.000472285	373295	0.77	bladder cancer	TRUE	NA	NA	NA	NA	NA	NA	NA	2.66e-06	13	94940936	1858	0.2214	TRUE	2	1	TRUE
CD45RA- CD4+ %T cell	rs10013442	A	G	A	G	0.1825	0.000253313	0.0944	0.084115	FALSE	FALSE	FALSE	ieu-b-4874	4	185924195	0.000248876	373295	0.31	bladder cancer	TRUE	NA	NA	NA	NA	NA	NA	NA	8.06e-06	4	185924195	3427	0.04082	TRUE	2	1	TRUE
CD45RA- CD4+ %T cell	rs1051488	T	C	T	C	0.1684	-7.86e-05	0.7693	0.297312	FALSE	FALSE	FALSE	ieu-b-4874	6	31322980	0.00014749	373295	0.59	bladder cancer	TRUE	TRUE	rs1051488	rs1131500	T	C	T	C	4.55e-07	6	31322911	3427	0.03331	TRUE	2	1	TRUE
CD45RA- CD4+ %T cell	rs11201613	A	G	A	G	-0.4646	0.000382847	0.0144	0.025784	FALSE	FALSE	FALSE	ieu-b-4874	10	87172617	0.000427351	373295	0.37	bladder cancer	TRUE	NA	NA	NA	NA	NA	NA	NA	4.12e-06	10	87172617	3427	0.1007	TRUE	2	1	TRUE
CD45RA- CD4+ %T cell	rs11579717	A	G	A	G	-0.9339	0.000269345	0.0044	0.048262	FALSE	FALSE	FALSE	ieu-b-4874	1	199999121	0.000323136	373295	0.4	bladder cancer	TRUE	NA	NA	NA	NA	NA	NA	NA	1.79e-07	1	199999121	3427	0.1786	TRUE	2	1	TRUE
CD45RA- CD4+ %T cell	rs12160006	C	T	C	T	-0.1697	-0.000381402	0.1106	0.069954	FALSE	FALSE	FALSE	ieu-b-4874	22	32667243	0.000284114	373295	0.18	bladder cancer	TRUE	NA	NA	NA	NA	NA	NA	NA	7.31e-06	22	32667243	3427	0.03778	TRUE	2	1	TRUE
CD45RA- CD4+ %T cell	rs12448994	T	C	T	C	0.1905	0.000169747	0.0925	0.179619	FALSE	FALSE	FALSE	ieu-b-4874	16	989381	0.000176248	373295	0.34	bladder cancer	TRUE	NA	NA	NA	NA	NA	NA	NA	3.28e-06	16	989381	3427	0.04089	TRUE	2	1	TRUE
CD45RA- CD4+ %T cell	rs12712610	G	A	G	A	-0.1632	-0.0002459	0.2969	0.172858	FALSE	FALSE	FALSE	ieu-b-4874	2	38897249	0.000180096	373295	0.17	bladder cancer	TRUE	NA	NA	NA	NA	NA	NA	NA	7.82e-10	2	38897249	3427	0.02646	TRUE	2	1	TRUE
CD45RA- CD4+ %T cell	rs1380699	G	A	G	A	-0.1468	0.00025181	0.2015	0.140841	FALSE	FALSE	FALSE	ieu-b-4874	2	57906216	0.000194674	373295	0.2	bladder cancer	TRUE	NA	NA	NA	NA	NA	NA	NA	1.9e-06	2	57906216	3427	0.03075	TRUE	2	1	TRUE
CD45RA- CD4+ %T cell	rs138143706	A	G	A	G	-0.3731	-0.000109654	0.0207	0.014421	FALSE	FALSE	FALSE	ieu-b-4874	6	13138376	0.000578454	373295	0.85	bladder cancer	TRUE	NA	NA	NA	NA	NA	NA	NA	8.03e-06	6	13138376	3427	0.08345	TRUE	2	1	TRUE
CD45RA- CD4+ %T cell	rs142403852	C	T	C	T	-0.6934	-0.000573506	0.0077	0.018969	FALSE	FALSE	FALSE	ieu-b-4874	12	86979143	0.000509056	373295	0.26	bladder cancer	TRUE	NA	NA	NA	NA	NA	NA	NA	1.37e-06	12	86979143	3427	0.1433	TRUE	2	1	TRUE
CD45RA- CD4+ %T cell	rs144196931	A	G	A	G	-0.3683	-8.6e-05	0.0229	0.035655	FALSE	FALSE	FALSE	ieu-b-4874	7	139232896	0.000366476	373295	0.81	bladder cancer	TRUE	NA	NA	NA	NA	NA	NA	NA	4.45e-06	7	139232896	3427	0.08013	TRUE	2	1	TRUE
CD45RA- CD4+ %T cell	rs146620586	T	G	T	G	-1.991	-0.000235011	0.0032	0.015023	FALSE	FALSE	FALSE	ieu-b-4874	1	198524264	0.000594266	373295	0.69	bladder cancer	TRUE	NA	NA	NA	NA	NA	NA	NA	1.78e-13	1	198524264	3427	0.2693	TRUE	2	1	TRUE
CD45RA- CD4+ %T cell	rs150422994	G	C	G	C	-0.3206	-0.000351016	0.0306	0.028403	FALSE	TRUE	FALSE	ieu-b-4874	1	21018820	0.000434465	373295	0.42	bladder cancer	TRUE	NA	NA	NA	NA	NA	NA	NA	2.42e-06	1	21018820	3427	0.06789	TRUE	2	1	TRUE
CD45RA- CD4+ %T cell	rs1550856	G	A	G	A	0.1562	6.82e-05	0.7785	0.890262	FALSE	FALSE	FALSE	ieu-b-4874	8	117805397	0.000223853	373295	0.760001	bladder cancer	TRUE	NA	NA	NA	NA	NA	NA	NA	8.59e-08	8	117805397	3427	0.02912	TRUE	2	1	TRUE
CD45RA- CD4+ %T cell	rs1581998	G	T	G	T	-0.13	-0.000207822	0.3166	0.260615	FALSE	FALSE	FALSE	ieu-b-4874	1	157535842	0.000153974	373295	0.18	bladder cancer	TRUE	NA	NA	NA	NA	NA	NA	NA	5.66e-07	1	157535842	3427	0.02593	TRUE	2	1	TRUE
CD45RA- CD4+ %T cell	rs1626874	A	G	A	G	0.1388	-6.29e-05	0.2164	0.263765	FALSE	FALSE	FALSE	ieu-b-4874	18	66895282	0.000153586	373295	0.68	bladder cancer	TRUE	NA	NA	NA	NA	NA	NA	NA	1.64e-06	18	66895282	3427	0.0289	TRUE	2	1	TRUE
CD45RA- CD4+ %T cell	rs188628982	T	G	T	G	0.3353	-0.000940208	0.0261	0.018095	FALSE	FALSE	FALSE	ieu-b-4874	11	86965976	0.000510335	373295	0.0649995	bladder cancer	TRUE	NA	NA	NA	NA	NA	NA	NA	9.16e-06	11	86965976	3427	0.07547	TRUE	2	1	TRUE
CD45RA- CD4+ %T cell	rs543009646	T	C	T	C	-0.3734	0.000833869	0.0225	0.016922	FALSE	FALSE	FALSE	ieu-b-4874	16	16334247	0.000617141	373295	0.18	bladder cancer	TRUE	NA	NA	NA	NA	NA	NA	NA	9.51e-06	16	16334247	3427	0.08419	TRUE	2	1	TRUE
CD45RA- CD4+ %T cell	rs62539662	C	A	C	A	0.4998	0.000177113	0.0117	0.039969	FALSE	FALSE	FALSE	ieu-b-4874	9	10237013	0.000346222	373295	0.61	bladder cancer	TRUE	NA	NA	NA	NA	NA	NA	NA	5e-06	9	10237013	3427	0.1093	TRUE	2	1	TRUE
CD45RA- CD4+ %T cell	rs72795179	A	G	A	G	0.1112	-0.000184943	0.4444	0.45797	FALSE	FALSE	FALSE	ieu-b-4874	2	38931153	0.000136058	373295	0.17	bladder cancer	TRUE	NA	NA	NA	NA	NA	NA	NA	5.39e-06	2	38931153	3427	0.02442	TRUE	2	1	TRUE
CD45RA- CD4+ %T cell	rs73196629	G	A	G	A	-0.6057	5.27e-05	0.0083	0.047393	FALSE	FALSE	FALSE	ieu-b-4874	21	19399885	0.000318001	373295	0.87	bladder cancer	TRUE	NA	NA	NA	NA	NA	NA	NA	1.32e-06	21	19399885	3427	0.125	TRUE	2	1	TRUE
CD45RA- CD4+ %T cell	rs74911099	C	T	C	T	-0.7845	0.000119423	0.0048	0.026723	FALSE	FALSE	FALSE	ieu-b-4874	6	85644512	0.000421239	373295	0.780001	bladder cancer	TRUE	NA	NA	NA	NA	NA	NA	NA	3.41e-06	6	85644512	3427	0.1687	TRUE	2	1	TRUE
CD45RA- CD4+ %T cell	rs7675607	G	T	G	T	-0.1152	-8.9e-05	0.6344	0.564423	FALSE	FALSE	FALSE	ieu-b-4874	4	37884855	0.00013701	373295	0.52	bladder cancer	TRUE	NA	NA	NA	NA	NA	NA	NA	4.36e-06	4	37884855	3427	0.02503	TRUE	2	1	TRUE
CD45RA- CD4+ %T cell	rs79647440	T	C	T	C	-4.107	-0.000990984	0.0004	0.012602	FALSE	FALSE	FALSE	ieu-b-4874	7	142438302	0.000669232	373295	0.14	bladder cancer	TRUE	NA	NA	NA	NA	NA	NA	NA	1.02e-07	7	142438302	3427	0.7699	TRUE	2	1	TRUE
CD45RA- CD4+ %T cell	rs9271766	G	A	G	A	-0.1842	5.49e-05	0.782	0.819762	FALSE	FALSE	FALSE	ieu-b-4874	6	32594169	0.000175849	373295	0.75	bladder cancer	TRUE	NA	NA	NA	NA	NA	NA	NA	9.54e-08	6	32594169	3427	0.03445	TRUE	2	1	TRUE
CD45RA- CD4+ %CD4+	rs10013469	A	G	A	G	0.192	0.000263074	0.0943	0.084374	FALSE	FALSE	FALSE	ieu-b-4874	4	185924276	0.000248393	373295	0.29	bladder cancer	TRUE	NA	NA	NA	NA	NA	NA	NA	1.89e-06	4	185924276	3427	0.04023	TRUE	2	1	TRUE
CD45RA- CD4+ %CD4+	rs10230422	A	G	A	G	0.1892	0.000583744	0.087	0.080338	FALSE	FALSE	FALSE	ieu-b-4874	7	16431997	0.00024965	373295	0.0189998	bladder cancer	TRUE	NA	NA	NA	NA	NA	NA	NA	6.61e-06	7	16431997	3427	0.04192	TRUE	2	1	TRUE
CD45RA- CD4+ %CD4+	rs10432663	C	T	C	T	-0.1402	-0.000244407	0.1959	0.222418	FALSE	FALSE	FALSE	ieu-b-4874	2	41958972	0.000164487	373295	0.14	bladder cancer	TRUE	TRUE	rs10432663	rs62136553	C	T	G	C	3.14e-06	2	41955462	3427	0.03003	TRUE	2	1	TRUE
CD45RA- CD4+ %CD4+	rs11124653	A	C	A	C	0.1345	-0.000230002	0.5909	0.609294	FALSE	FALSE	FALSE	ieu-b-4874	2	39112166	0.000138911	373295	0.0980009	bladder cancer	TRUE	NA	NA	NA	NA	NA	NA	NA	3.92e-08	2	39112166	3427	0.02443	TRUE	2	1	TRUE
CD45RA- CD4+ %CD4+	rs11579717	A	G	A	G	-1.081	0.000269345	0.0044	0.048262	FALSE	FALSE	FALSE	ieu-b-4874	1	199999121	0.000323136	373295	0.4	bladder cancer	TRUE	NA	NA	NA	NA	NA	NA	NA	8.87e-10	1	199999121	3427	0.1759	TRUE	2	1	TRUE
CD45RA- CD4+ %CD4+	rs12121018	A	G	A	G	-0.1566	-0.000262536	0.1882	0.077518	FALSE	FALSE	FALSE	ieu-b-4874	1	94176595	0.000254867	373295	0.3	bladder cancer	TRUE	NA	NA	NA	NA	NA	NA	NA	6e-07	1	94176595	3427	0.03132	TRUE	2	1	TRUE
CD45RA- CD4+ %CD4+	rs1250600	G	T	G	T	-0.1145	5.14e-05	0.6733	0.644508	FALSE	FALSE	FALSE	ieu-b-4874	10	81010850	0.00014129	373295	0.719999	bladder cancer	TRUE	NA	NA	NA	NA	NA	NA	NA	7.58e-06	10	81010850	3427	0.02553	TRUE	2	1	TRUE
CD45RA- CD4+ %CD4+	rs12712610	G	A	G	A	-0.1902	-0.0002459	0.2969	0.172858	FALSE	FALSE	FALSE	ieu-b-4874	2	38897249	0.000180096	373295	0.17	bladder cancer	TRUE	NA	NA	NA	NA	NA	NA	NA	3.13e-13	2	38897249	3427	0.02599	TRUE	2	1	TRUE
CD45RA- CD4+ %CD4+	rs141350785	C	G	C	G	-0.2543	0.000121682	0.0461	0.112934	FALSE	TRUE	FALSE	ieu-b-4874	11	5240669	0.000217012	373295	0.57	bladder cancer	TRUE	NA	NA	NA	NA	NA	NA	NA	4.95e-06	11	5240669	3427	0.0556	TRUE	2	1	TRUE
CD45RA- CD4+ %CD4+	rs146329634	T	C	T	C	0.3128	0.000158274	0.0328	0.019056	FALSE	FALSE	FALSE	ieu-b-4874	14	89433599	0.000494439	373295	0.75	bladder cancer	TRUE	NA	NA	NA	NA	NA	NA	NA	1.82e-06	14	89433599	3427	0.06543	TRUE	2	1	TRUE
CD45RA- CD4+ %CD4+	rs146620586	T	G	T	G	-2.021	-0.000235011	0.0032	0.015023	FALSE	FALSE	FALSE	ieu-b-4874	1	198524264	0.000594266	373295	0.69	bladder cancer	TRUE	NA	NA	NA	NA	NA	NA	NA	3.46e-14	1	198524264	3427	0.2655	TRUE	2	1	TRUE
CD45RA- CD4+ %CD4+	rs146674398	T	C	T	C	-0.4158	0.000866797	0.0159	0.025123	FALSE	FALSE	FALSE	ieu-b-4874	1	187940731	0.000439603	373295	0.0490004	bladder cancer	TRUE	NA	NA	NA	NA	NA	NA	NA	9.44e-06	1	187940731	3427	0.09372	TRUE	2	1	TRUE
CD45RA- CD4+ %CD4+	rs150607181	C	G	C	G	-0.4267	8.59e-05	0.0168	0.018918	FALSE	TRUE	FALSE	ieu-b-4874	1	239680551	0.000527783	373295	0.87	bladder cancer	TRUE	NA	NA	NA	NA	NA	NA	NA	6.01e-06	1	239680551	3427	0.09412	TRUE	2	1	TRUE
CD45RA- CD4+ %CD4+	rs183293285	T	C	T	C	-0.425	-0.000886379	0.0171	0.024832	FALSE	FALSE	FALSE	ieu-b-4874	3	75917650	0.000497984	373295	0.0749998	bladder cancer	TRUE	NA	NA	NA	NA	NA	NA	NA	3.81e-06	3	75917650	3427	0.09182	TRUE	2	1	TRUE
CD45RA- CD4+ %CD4+	rs1849779	T	C	T	C	-0.1119	-7.82e-05	0.3826	0.349374	FALSE	FALSE	FALSE	ieu-b-4874	12	43674787	0.000142826	373295	0.58	bladder cancer	TRUE	NA	NA	NA	NA	NA	NA	NA	5.04e-06	12	43674787	3427	0.02448	TRUE	2	1	TRUE
CD45RA- CD4+ %CD4+	rs2252009	G	T	G	T	0.1373	2.57e-05	0.1773	0.223153	FALSE	FALSE	FALSE	ieu-b-4874	16	3214442	0.000162049	373295	0.87	bladder cancer	TRUE	NA	NA	NA	NA	NA	NA	NA	7.22e-06	16	3214442	3427	0.03055	TRUE	2	1	TRUE
CD45RA- CD4+ %CD4+	rs62341785	G	A	G	A	0.1329	0.000102998	0.2022	0.152922	FALSE	FALSE	FALSE	ieu-b-4874	5	7272022	0.000188395	373295	0.58	bladder cancer	TRUE	NA	NA	NA	NA	NA	NA	NA	5.94e-06	5	7272022	3427	0.02929	TRUE	2	1	TRUE
CD45RA- CD4+ %CD4+	rs71569312	T	C	T	C	0.4277	-0.000468439	0.0177	0.017594	FALSE	FALSE	FALSE	ieu-b-4874	6	35830034	0.000537719	373295	0.38	bladder cancer	TRUE	NA	NA	NA	NA	NA	NA	NA	3.35e-06	6	35830034	3427	0.09186	TRUE	2	1	TRUE
CD45RA- CD4+ %CD4+	rs7216330	T	C	T	C	-0.1152	-1.01e-05	0.5057	0.603132	FALSE	FALSE	FALSE	ieu-b-4874	17	4102387	0.000138336	373295	0.94	bladder cancer	TRUE	NA	NA	NA	NA	NA	NA	NA	1.77e-06	17	4102387	3427	0.02407	TRUE	2	1	TRUE
CD45RA- CD4+ %CD4+	rs72613709	G	T	G	T	0.2888	-0.000197917	0.0376	0.071545	FALSE	FALSE	FALSE	ieu-b-4874	2	197060767	0.000263535	373295	0.450001	bladder cancer	TRUE	NA	NA	NA	NA	NA	NA	NA	3.94e-06	2	197060767	3427	0.06249	TRUE	2	1	TRUE
CD45RA- CD4+ %CD4+	rs73189225	A	G	A	G	-0.1661	5.74e-05	0.1103	0.254766	FALSE	FALSE	FALSE	ieu-b-4874	12	108927798	0.000155085	373295	0.709999	bladder cancer	TRUE	NA	NA	NA	NA	NA	NA	NA	8.12e-06	12	108927798	3427	0.03716	TRUE	2	1	TRUE
CD45RA- CD4+ %CD4+	rs76201922	G	C	G	C	-0.3839	-0.000258122	0.0193	0.042642	FALSE	TRUE	FALSE	ieu-b-4874	1	226764439	0.000335107	373295	0.44	bladder cancer	TRUE	NA	NA	NA	NA	NA	NA	NA	6.77e-06	1	226764439	3427	0.08517	TRUE	2	1	TRUE
CD45RA- CD4+ %CD4+	rs76516339	T	A	T	A	-0.1648	0.000279597	0.1533	0.185947	FALSE	TRUE	FALSE	ieu-b-4874	18	74287337	0.00017377	373295	0.11	bladder cancer	TRUE	NA	NA	NA	NA	NA	NA	NA	3.05e-07	18	74287337	3427	0.03213	TRUE	2	1	TRUE
CD45RA- CD4+ %CD4+	rs7700617	A	C	A	C	-0.1075	0.000119986	0.4181	0.497264	FALSE	FALSE	FALSE	ieu-b-4874	5	39546706	0.000135599	373295	0.38	bladder cancer	TRUE	NA	NA	NA	NA	NA	NA	NA	6.87e-06	5	39546706	3427	0.02387	TRUE	2	1	TRUE
CD45RA- CD4+ %CD4+	rs9271766	G	A	G	A	-0.1619	5.49e-05	0.782	0.819762	FALSE	FALSE	FALSE	ieu-b-4874	6	32594169	0.000175849	373295	0.75	bladder cancer	TRUE	NA	NA	NA	NA	NA	NA	NA	1.51e-06	6	32594169	3427	0.03361	TRUE	2	1	TRUE
CD45RA- CD4+ %CD4+	rs931555	T	C	T	C	-0.1246	0.00017958	0.2613	0.335213	FALSE	FALSE	FALSE	ieu-b-4874	5	35803577	0.00014311	373295	0.21	bladder cancer	TRUE	NA	NA	NA	NA	NA	NA	NA	9.25e-06	5	35803577	3427	0.02807	TRUE	2	1	TRUE
Memory B cell AC	rs10018308	G	A	G	A	0.1198	2.56e-05	0.3441	0.348952	FALSE	FALSE	FALSE	ieu-b-4874	4	120657899	0.000142024	373295	0.86	bladder cancer	TRUE	NA	NA	NA	NA	NA	NA	NA	8.09e-06	4	120657899	3656	0.0268	TRUE	2	1	TRUE
Memory B cell AC	rs11653761	T	G	T	G	-0.1161	0.000126334	0.592	0.618758	FALSE	FALSE	FALSE	ieu-b-4874	17	2716535	0.00013937	373295	0.36	bladder cancer	TRUE	NA	NA	NA	NA	NA	NA	NA	2.94e-06	17	2716535	3656	0.02478	TRUE	2	1	TRUE
Memory B cell AC	rs12216018	T	C	T	C	-0.1641	0.000466364	0.1415	0.158773	FALSE	FALSE	FALSE	ieu-b-4874	6	130514590	0.000188045	373295	0.0129999	bladder cancer	TRUE	NA	NA	NA	NA	NA	NA	NA	5.39e-06	6	130514590	3656	0.03601	TRUE	2	1	TRUE
Memory B cell AC	rs12763172	C	T	C	T	0.1259	-3.76e-05	0.7213	0.590232	FALSE	FALSE	FALSE	ieu-b-4874	10	85447519	0.000137818	373295	0.79	bladder cancer	TRUE	NA	NA	NA	NA	NA	NA	NA	6.27e-06	10	85447519	3656	0.02783	TRUE	2	1	TRUE
Memory B cell AC	rs12874404	G	A	G	A	0.173	-1.24e-05	0.3256	0.054193	FALSE	FALSE	FALSE	ieu-b-4874	13	108993494	0.000298334	373295	0.97	bladder cancer	TRUE	NA	NA	NA	NA	NA	NA	NA	9.14e-11	13	108993494	3656	0.02661	TRUE	2	1	TRUE
Memory B cell AC	rs16867231	A	G	A	G	0.538	-0.000284418	0.0108	0.040335	FALSE	FALSE	FALSE	ieu-b-4874	2	181050023	0.000345831	373295	0.41	bladder cancer	TRUE	NA	NA	NA	NA	NA	NA	NA	3.45e-06	2	181050023	3656	0.1157	TRUE	2	1	TRUE
Memory B cell AC	rs17708396	A	C	A	C	2.504	0.000266184	0.0005	0.013191	FALSE	FALSE	FALSE	ieu-b-4874	5	148410250	0.000636633	373295	0.68	bladder cancer	TRUE	NA	NA	NA	NA	NA	NA	NA	1.68e-06	5	148410250	3656	0.522	TRUE	2	1	TRUE
Memory B cell AC	rs2879633	A	G	A	G	-0.1301	0.00017083	0.2884	0.249528	FALSE	FALSE	FALSE	ieu-b-4874	10	53757050	0.000156446	373295	0.27	bladder cancer	TRUE	NA	NA	NA	NA	NA	NA	NA	2.84e-06	10	53757050	3656	0.02775	TRUE	2	1	TRUE
Memory B cell AC	rs36072728	T	C	T	C	0.305	-0.000232242	0.0356	0.081565	FALSE	FALSE	FALSE	ieu-b-4874	11	29448646	0.000250582	373295	0.35	bladder cancer	TRUE	NA	NA	NA	NA	NA	NA	NA	5.81e-06	11	29448646	3656	0.06718	TRUE	2	1	TRUE
Memory B cell AC	rs557577736	G	A	G	A	1.829	0.00124248	0.001	0.010008	FALSE	FALSE	FALSE	ieu-b-4874	13	46224092	0.000688033	373295	0.0710003	bladder cancer	TRUE	NA	NA	NA	NA	NA	NA	NA	2.69e-06	13	46224092	3656	0.3891	TRUE	2	1	TRUE
Memory B cell AC	rs61997631	G	C	G	C	-0.2972	-3.82e-05	0.0432	0.062879	FALSE	TRUE	FALSE	ieu-b-4874	14	104600920	0.000278744	373295	0.89	bladder cancer	TRUE	NA	NA	NA	NA	NA	NA	NA	1.36e-06	14	104600920	3656	0.06141	TRUE	2	1	TRUE
Memory B cell AC	rs74565175	A	G	A	G	0.1371	0.000333854	0.2009	0.140197	FALSE	FALSE	FALSE	ieu-b-4874	7	81370578	0.000194528	373295	0.0860003	bladder cancer	TRUE	NA	NA	NA	NA	NA	NA	NA	7.27e-06	7	81370578	3656	0.03052	TRUE	2	1	TRUE
Memory B cell AC	rs77643931	G	T	G	T	0.1235	-0.000235152	0.2798	0.150643	FALSE	FALSE	FALSE	ieu-b-4874	9	129171041	0.000189045	373295	0.21	bladder cancer	TRUE	NA	NA	NA	NA	NA	NA	NA	8.97e-06	9	129171041	3656	0.02777	TRUE	2	1	TRUE
Memory B cell AC	rs77762131	C	G	C	G	0.2713	-0.000332594	0.045	0.019936	FALSE	TRUE	FALSE	ieu-b-4874	14	96205838	0.000497271	373295	0.5	bladder cancer	TRUE	NA	NA	NA	NA	NA	NA	NA	2.95e-06	14	96205838	3656	0.05795	TRUE	2	1	TRUE
Memory B cell AC	rs9614226	G	T	G	T	-0.4235	0.000290214	0.9792	0.947669	FALSE	FALSE	FALSE	ieu-b-4874	22	44688150	0.000303247	373295	0.34	bladder cancer	TRUE	NA	NA	NA	NA	NA	NA	NA	1.22e-06	22	44688150	3656	0.08713	TRUE	2	1	TRUE
CD45RA on naive CD4+	rs10022333	G	C	G	C	-0.1337	0.000422396	0.2527	0.234197	FALSE	TRUE	FALSE	ieu-b-4874	4	19362367	0.000159834	373295	0.00819993	bladder cancer	TRUE	NA	NA	NA	NA	NA	NA	NA	7.58e-06	4	19362367	2910	0.02982	TRUE	2	1	TRUE
CD45RA on naive CD4+	rs113885925	T	C	T	C	0.4252	0.00014511	0.0203	0.023977	FALSE	FALSE	FALSE	ieu-b-4874	2	38094107	0.000441914	373295	0.74	bladder cancer	TRUE	NA	NA	NA	NA	NA	NA	NA	6.16e-06	2	38094107	2910	0.09388	TRUE	2	1	TRUE
CD45RA on naive CD4+	rs115645435	C	T	C	T	0.4693	9.93e-05	0.0153	0.018388	FALSE	FALSE	FALSE	ieu-b-4874	4	22091595	0.000516109	373295	0.85	bladder cancer	TRUE	NA	NA	NA	NA	NA	NA	NA	6.92e-06	4	22091595	2910	0.1042	TRUE	2	1	TRUE
CD45RA on naive CD4+	rs117626397	G	A	G	A	2.551	-7.84e-06	0.0005	0.019718	FALSE	FALSE	FALSE	ieu-b-4874	10	131423918	0.000521547	373295	0.99	bladder cancer	TRUE	NA	NA	NA	NA	NA	NA	NA	5.36e-06	10	131423918	2910	0.5596	TRUE	2	1	TRUE
CD45RA on naive CD4+	rs12730924	G	A	G	A	0.1271	4.54e-06	0.2859	0.321911	FALSE	FALSE	FALSE	ieu-b-4874	1	10870863	0.000146737	373295	0.98	bladder cancer	TRUE	NA	NA	NA	NA	NA	NA	NA	9.45e-06	1	10870863	2910	0.02865	TRUE	2	1	TRUE
CD45RA on naive CD4+	rs138283413	T	C	T	C	0.3299	0.000795298	0.0375	0.03046	FALSE	FALSE	FALSE	ieu-b-4874	2	40480936	0.000420971	373295	0.0589997	bladder cancer	TRUE	NA	NA	NA	NA	NA	NA	NA	2.32e-06	2	40480936	2910	0.0697	TRUE	2	1	TRUE
CD45RA on naive CD4+	rs138915779	A	C	A	C	1.33	-8.13e-05	0.0036	0.022222	FALSE	FALSE	FALSE	ieu-b-4874	1	190079170	0.000476153	373295	0.86	bladder cancer	TRUE	NA	NA	NA	NA	NA	NA	NA	6.19e-09	1	190079170	2910	0.2281	TRUE	2	1	TRUE
CD45RA on naive CD4+	rs139544135	T	C	T	C	0.3938	0.000511304	0.0223	0.017125	FALSE	FALSE	FALSE	ieu-b-4874	2	37885284	0.000541118	373295	0.34	bladder cancer	TRUE	NA	NA	NA	NA	NA	NA	NA	6.46e-06	2	37885284	2910	0.08713	TRUE	2	1	TRUE
CD45RA on naive CD4+	rs145947216	T	C	T	C	0.7147	0.000310486	0.0375	0.021432	FALSE	FALSE	FALSE	ieu-b-4874	2	38596674	0.000495514	373295	0.53	bladder cancer	TRUE	NA	NA	NA	NA	NA	NA	NA	9.98e-24	2	38596674	2910	0.07055	TRUE	2	1	TRUE
CD45RA on naive CD4+	rs147071297	A	G	A	G	1.525	-0.000243507	0.0036	0.022535	FALSE	FALSE	FALSE	ieu-b-4874	1	191648600	0.00046497	373295	0.6	bladder cancer	TRUE	NA	NA	NA	NA	NA	NA	NA	9.25e-13	1	191648600	2910	0.2126	TRUE	2	1	TRUE
CD45RA on naive CD4+	rs147692482	T	C	T	C	0.6089	-0.000668462	0.0246	0.01119	FALSE	FALSE	FALSE	ieu-b-4874	2	39864242	0.000667269	373295	0.32	bladder cancer	TRUE	NA	NA	NA	NA	NA	NA	NA	6.32e-13	2	39864242	2910	0.08426	TRUE	2	1	TRUE
CD45RA on naive CD4+	rs1641548	T	C	T	C	0.176	-2.68e-05	0.1533	0.196328	FALSE	FALSE	FALSE	ieu-b-4874	17	7574779	0.000173257	373295	0.88	bladder cancer	TRUE	NA	NA	NA	NA	NA	NA	NA	1.05e-06	17	7574779	2910	0.03597	TRUE	2	1	TRUE
CD45RA on naive CD4+	rs17583875	A	G	A	G	2.212	-0.00022637	0.0029	0.020833	FALSE	FALSE	FALSE	ieu-b-4874	1	197924770	0.000473128	373295	0.630001	bladder cancer	TRUE	NA	NA	NA	NA	NA	NA	NA	2.83e-21	1	197924770	2910	0.2318	TRUE	2	1	TRUE
CD45RA on naive CD4+	rs182240059	G	C	G	C	0.6602	-0.000903186	0.0351	0.012265	FALSE	TRUE	FALSE	ieu-b-4874	2	38955419	0.000639902	373295	0.16	bladder cancer	TRUE	NA	NA	NA	NA	NA	NA	NA	2.53e-20	2	38955419	2910	0.07094	TRUE	2	1	TRUE
CD45RA on naive CD4+	rs28590272	G	A	G	A	0.1304	1.1e-05	0.2668	0.303822	FALSE	FALSE	FALSE	ieu-b-4874	7	50360663	0.000147879	373295	0.94	bladder cancer	TRUE	NA	NA	NA	NA	NA	NA	NA	9.36e-06	7	50360663	2910	0.02937	TRUE	2	1	TRUE
CD45RA on naive CD4+	rs34558770	T	C	T	C	0.4963	-0.000112123	0.1871	0.07702	FALSE	FALSE	FALSE	ieu-b-4874	2	38933040	0.000254231	373295	0.66	bladder cancer	TRUE	NA	NA	NA	NA	NA	NA	NA	5.75e-51	2	38933040	2910	0.03241	TRUE	2	1	TRUE
CD45RA on naive CD4+	rs35550194	A	G	A	G	0.3391	0.000192558	0.0375	0.051966	FALSE	FALSE	FALSE	ieu-b-4874	3	10639764	0.000304871	373295	0.53	bladder cancer	TRUE	NA	NA	NA	NA	NA	NA	NA	6e-07	3	10639764	2910	0.06779	TRUE	2	1	TRUE
CD45RA on naive CD4+	rs35592432	C	G	C	G	-0.4046	-0.000237146	0.0259	0.02745	FALSE	TRUE	FALSE	ieu-b-4874	3	71355240	0.00043481	373295	0.59	bladder cancer	TRUE	NA	NA	NA	NA	NA	NA	NA	5.05e-07	3	71355240	2910	0.08034	TRUE	2	1	TRUE
CD45RA on naive CD4+	rs55733272	C	G	C	G	0.1463	0.000257208	0.194	0.229319	FALSE	TRUE	FALSE	ieu-b-4874	18	4765016	0.000170457	373295	0.13	bladder cancer	TRUE	NA	NA	NA	NA	NA	NA	NA	8.47e-06	18	4765016	2910	0.0328	TRUE	2	1	TRUE
CD45RA on naive CD4+	rs61913600	G	A	G	A	0.1272	-0.00027733	0.332	0.34834	FALSE	FALSE	FALSE	ieu-b-4874	12	12884357	0.000141802	373295	0.05	bladder cancer	TRUE	NA	NA	NA	NA	NA	NA	NA	4.92e-06	12	12884357	2910	0.0278	TRUE	2	1	TRUE
CD45RA on naive CD4+	rs61938012	A	G	A	G	-0.1286	-0.000167007	0.2789	0.269331	FALSE	FALSE	FALSE	ieu-b-4874	12	119526748	0.000150738	373295	0.27	bladder cancer	TRUE	NA	NA	NA	NA	NA	NA	NA	9.22e-06	12	119526748	2910	0.02895	TRUE	2	1	TRUE
CD45RA on naive CD4+	rs62328019	T	C	T	C	0.2505	-0.000279932	0.0565	0.078465	FALSE	FALSE	FALSE	ieu-b-4874	4	147691255	0.000257304	373295	0.28	bladder cancer	TRUE	NA	NA	NA	NA	NA	NA	NA	9.15e-06	4	147691255	2910	0.05636	TRUE	2	1	TRUE
CD45RA on naive CD4+	rs72859264	A	G	A	G	-0.4805	0.000466182	0.0139	0.030494	FALSE	FALSE	FALSE	ieu-b-4874	11	11304233	0.00039987	373295	0.24	bladder cancer	TRUE	NA	NA	NA	NA	NA	NA	NA	8.93e-06	11	11304233	2910	0.108	TRUE	2	1	TRUE
CD45RA on naive CD4+	rs74967706	C	T	C	T	0.7222	-0.000346097	0.0089	0.031475	FALSE	FALSE	FALSE	ieu-b-4874	1	195466150	0.000387236	373295	0.37	bladder cancer	TRUE	NA	NA	NA	NA	NA	NA	NA	8.95e-08	1	195466150	2910	0.1347	TRUE	2	1	TRUE
CD45RA on naive CD4+	rs75425544	T	C	T	C	-0.4207	6.74e-05	0.0192	0.021842	FALSE	FALSE	FALSE	ieu-b-4874	20	31591228	0.00046241	373295	0.88	bladder cancer	TRUE	NA	NA	NA	NA	NA	NA	NA	6.59e-06	20	31591228	2910	0.09318	TRUE	2	1	TRUE
CD45RA on naive CD4+	rs7605193	G	T	G	T	-0.3245	-0.000251713	0.0643	0.053068	FALSE	FALSE	FALSE	ieu-b-4874	2	38698112	0.000302772	373295	0.41	bladder cancer	TRUE	NA	NA	NA	NA	NA	NA	NA	1.19e-09	2	38698112	2910	0.05318	TRUE	2	1	TRUE
CD45RA on naive CD4+	rs79000121	G	A	G	A	-0.3227	0.000119712	0.0416	0.062728	FALSE	FALSE	FALSE	ieu-b-4874	7	10126364	0.000277717	373295	0.67	bladder cancer	TRUE	NA	NA	NA	NA	NA	NA	NA	5.96e-07	7	10126364	2910	0.0645	TRUE	2	1	TRUE
CD45RA on naive CD4+	rs79505210	T	C	T	C	0.4859	-0.00028474	0.0194	0.017356	FALSE	FALSE	FALSE	ieu-b-4874	12	132969270	0.000519467	373295	0.58	bladder cancer	TRUE	NA	NA	NA	NA	NA	NA	NA	3.13e-07	12	132969270	2910	0.09477	TRUE	2	1	TRUE
CD45RA on naive CD4+	rs79747818	T	C	T	C	0.3184	-1.42e-05	0.0689	0.018783	FALSE	FALSE	FALSE	ieu-b-4874	2	41757305	0.000498176	373295	0.98	bladder cancer	TRUE	NA	NA	NA	NA	NA	NA	NA	1.59e-09	2	41757305	2910	0.0526	TRUE	2	1	TRUE
CD45RA on naive CD4+	rs917116	G	T	G	T	0.1762	-0.000184353	0.2548	0.212743	FALSE	FALSE	FALSE	ieu-b-4874	7	28172739	0.000165094	373295	0.26	bladder cancer	TRUE	NA	NA	NA	NA	NA	NA	NA	4.26e-09	7	28172739	2910	0.0299	TRUE	2	1	TRUE
CD45RA on naive CD4+	rs9834739	C	T	C	T	-0.3956	0.000472439	0.0225	0.021749	FALSE	FALSE	FALSE	ieu-b-4874	3	11614492	0.000463396	373295	0.31	bladder cancer	TRUE	NA	NA	NA	NA	NA	NA	NA	7.02e-06	3	11614492	2910	0.08788	TRUE	2	1	TRUE
CD33 on Mo MDSC	rs10022829	A	G	A	G	-0.1723	-0.000390116	0.6087	0.698904	FALSE	FALSE	FALSE	ieu-b-4874	4	506471	0.000181064	373295	0.0309999	bladder cancer	TRUE	NA	NA	NA	NA	NA	NA	NA	5.59e-06	4	506471	1569	0.0378	TRUE	2	1	TRUE
CD33 on Mo MDSC	rs10164761	T	C	T	C	0.1855	-0.000171274	0.6348	0.741624	FALSE	FALSE	FALSE	ieu-b-4874	2	220066209	0.000157798	373295	0.28	bladder cancer	TRUE	NA	NA	NA	NA	NA	NA	NA	1.81e-06	2	220066209	1569	0.0387	TRUE	2	1	TRUE
CD33 on Mo MDSC	rs10861528	A	C	A	C	0.1809	-9.08e-05	0.2929	0.18685	FALSE	FALSE	FALSE	ieu-b-4874	12	106266488	0.000173964	373295	0.6	bladder cancer	TRUE	NA	NA	NA	NA	NA	NA	NA	8.23e-06	12	106266488	1569	0.04043	TRUE	2	1	TRUE
CD33 on Mo MDSC	rs117150385	A	G	A	G	-0.887	0.000394431	0.0083	0.013364	FALSE	FALSE	FALSE	ieu-b-4874	17	9157491	0.000639383	373295	0.54	bladder cancer	TRUE	NA	NA	NA	NA	NA	NA	NA	8.67e-06	17	9157491	1569	0.1988	TRUE	2	1	TRUE
CD33 on Mo MDSC	rs138138479	T	G	T	G	0.7945	-0.000692049	0.0108	0.020366	FALSE	FALSE	FALSE	ieu-b-4874	10	22339808	0.000499985	373295	0.17	bladder cancer	TRUE	NA	NA	NA	NA	NA	NA	NA	6.28e-06	10	22339808	1569	0.1753	TRUE	2	1	TRUE
CD33 on Mo MDSC	rs2362605	A	G	A	G	-0.2041	-0.000193813	0.2157	0.311755	FALSE	FALSE	FALSE	ieu-b-4874	3	190480177	0.000146227	373295	0.19	bladder cancer	TRUE	NA	NA	NA	NA	NA	NA	NA	5.33e-06	3	190480177	1569	0.04469	TRUE	2	1	TRUE
CD33 on Mo MDSC	rs3865444	A	C	A	C	-1.151	-0.000269157	0.1896	0.323514	FALSE	FALSE	FALSE	ieu-b-4874	19	51727962	0.000144374	373295	0.0619998	bladder cancer	TRUE	NA	NA	NA	NA	NA	NA	NA	1.71e-153	19	51727962	1569	0.03884	TRUE	2	1	TRUE
CD33 on Mo MDSC	rs403286	A	G	A	G	0.178	0.000130572	0.5223	0.53657	FALSE	FALSE	FALSE	ieu-b-4874	3	55264003	0.000135735	373295	0.34	bladder cancer	TRUE	NA	NA	NA	NA	NA	NA	NA	2.76e-06	3	55264003	1569	0.03783	TRUE	2	1	TRUE
CD33 on Mo MDSC	rs4747079	A	G	A	G	0.377	0.000900288	0.0491	0.045788	FALSE	FALSE	FALSE	ieu-b-4874	10	72466435	0.000323614	373295	0.00539995	bladder cancer	TRUE	NA	NA	NA	NA	NA	NA	NA	9.27e-06	10	72466435	1569	0.08474	TRUE	2	1	TRUE
CD33 on Mo MDSC	rs58301181	G	C	G	C	-0.3795	-0.000350038	0.0848	0.106919	FALSE	TRUE	FALSE	ieu-b-4874	19	52097261	0.00021834	373295	0.11	bladder cancer	TRUE	NA	NA	NA	NA	NA	NA	NA	1.94e-08	19	52097261	1569	0.06721	TRUE	2	1	TRUE
CD33 on Mo MDSC	rs62114147	T	C	T	C	0.2625	-5.96e-05	0.5586	0.530454	FALSE	FALSE	FALSE	ieu-b-4874	19	51588018	0.000135454	373295	0.66	bladder cancer	TRUE	NA	NA	NA	NA	NA	NA	NA	2.56e-12	19	51588018	1569	0.03721	TRUE	2	1	TRUE
CD33 on Mo MDSC	rs6828373	C	T	C	T	0.2291	-0.000329706	0.1992	0.174305	FALSE	FALSE	FALSE	ieu-b-4874	4	154476924	0.00018339	373295	0.0719996	bladder cancer	TRUE	NA	NA	NA	NA	NA	NA	NA	9.37e-07	4	154476924	1569	0.04653	TRUE	2	1	TRUE
CD33 on Mo MDSC	rs6879785	G	A	G	A	0.1882	-3.03e-06	0.289	0.356507	FALSE	FALSE	FALSE	ieu-b-4874	5	75450373	0.000141196	373295	0.98	bladder cancer	TRUE	NA	NA	NA	NA	NA	NA	NA	6.27e-06	5	75450373	1569	0.04153	TRUE	2	1	TRUE
CD33 on Mo MDSC	rs6974483	A	T	A	T	0.1843	-6.01e-06	0.3161	0.279713	FALSE	TRUE	FALSE	ieu-b-4874	7	52705752	0.000150875	373295	0.97	bladder cancer	TRUE	NA	NA	NA	NA	NA	NA	NA	5.79e-06	7	52705752	1569	0.0405	TRUE	2	1	TRUE
CD33 on Mo MDSC	rs7047105	G	A	G	A	-0.1918	2.89e-05	0.5641	0.693323	FALSE	FALSE	FALSE	ieu-b-4874	9	105951980	0.00014673	373295	0.84	bladder cancer	TRUE	NA	NA	NA	NA	NA	NA	NA	6.02e-07	9	105951980	1569	0.03828	TRUE	2	1	TRUE
CD33 on Mo MDSC	rs73015201	T	C	T	C	-0.1973	-0.000706855	0.2384	0.117847	FALSE	FALSE	FALSE	ieu-b-4874	6	148351645	0.000210441	373295	0.000779992	bladder cancer	TRUE	NA	NA	NA	NA	NA	NA	NA	6.78e-06	6	148351645	1569	0.04369	TRUE	2	1	TRUE
CD33 on Mo MDSC	rs73051934	G	A	G	A	-0.5175	-8.47e-06	0.0258	0.019567	FALSE	FALSE	FALSE	ieu-b-4874	19	48582916	0.000513623	373295	0.99	bladder cancer	TRUE	NA	NA	NA	NA	NA	NA	NA	4.18e-06	19	48582916	1569	0.1121	TRUE	2	1	TRUE
CD33 on Mo MDSC	rs73259850	C	A	C	A	-0.3828	4.4e-05	0.0641	0.073574	FALSE	FALSE	FALSE	ieu-b-4874	10	56897405	0.000261747	373295	0.87	bladder cancer	TRUE	NA	NA	NA	NA	NA	NA	NA	4.12e-07	10	56897405	1569	0.07528	TRUE	2	1	TRUE
CD33 on Mo MDSC	rs7351079	G	A	G	A	-0.3677	5.26e-05	0.2604	0.174167	FALSE	FALSE	FALSE	ieu-b-4874	19	51574038	0.000178302	373295	0.77	bladder cancer	TRUE	NA	NA	NA	NA	NA	NA	NA	9.03e-18	19	51574038	1569	0.04232	TRUE	2	1	TRUE
CD33 on Mo MDSC	rs8108687	G	A	G	A	-0.1787	-4.17e-05	0.646	0.699224	FALSE	FALSE	FALSE	ieu-b-4874	19	927971	0.000150061	373295	0.780001	bladder cancer	TRUE	NA	NA	NA	NA	NA	NA	NA	3.66e-06	19	927971	1569	0.03845	TRUE	2	1	TRUE
CD33 on Mo MDSC	rs9867350	A	G	A	G	0.2165	5.3e-05	0.1839	0.247605	FALSE	FALSE	FALSE	ieu-b-4874	3	129451519	0.000157076	373295	0.74	bladder cancer	TRUE	NA	NA	NA	NA	NA	NA	NA	7.23e-06	3	129451519	1569	0.0481	TRUE	2	1	TRUE
CD33 on Im MDSC	rs10022829	A	G	A	G	-0.1696	-0.000390116	0.6062	0.698904	FALSE	FALSE	FALSE	ieu-b-4874	4	506471	0.000181064	373295	0.0309999	bladder cancer	TRUE	NA	NA	NA	NA	NA	NA	NA	7.42e-06	4	506471	1554	0.03773	TRUE	2	1	TRUE
CD33 on Im MDSC	rs10040068	T	C	T	C	0.1917	3.57e-05	0.7452	0.722189	FALSE	FALSE	FALSE	ieu-b-4874	5	17802524	0.000151148	373295	0.81	bladder cancer	TRUE	TRUE	rs10040068	rs10064153	C	T	C	A	7.5e-06	5	17802169	1554	0.04266	TRUE	2	1	TRUE
CD33 on Im MDSC	rs111695695	A	C	A	C	-0.5128	0.000506202	0.0772	0.027099	FALSE	FALSE	FALSE	ieu-b-4874	19	51897760	0.000475788	373295	0.29	bladder cancer	TRUE	NA	NA	NA	NA	NA	NA	NA	1.06e-13	19	51897760	1554	0.06836	TRUE	2	1	TRUE
CD33 on Im MDSC	rs117140964	T	C	T	C	0.418	3.62e-05	0.0444	0.041001	FALSE	FALSE	FALSE	ieu-b-4874	10	101688758	0.000351331	373295	0.92	bladder cancer	TRUE	TRUE	rs117140964	rs4298837	T	C	A	G	2.52e-06	10	101609403	1554	0.08848	TRUE	2	1	TRUE
CD33 on Im MDSC	rs11765781	A	G	A	G	0.1816	-8.1e-05	0.6245	0.726737	FALSE	FALSE	FALSE	ieu-b-4874	7	4764861	0.000152827	373295	0.6	bladder cancer	TRUE	NA	NA	NA	NA	NA	NA	NA	4.97e-06	7	4764861	1554	0.03963	TRUE	2	1	TRUE
CD33 on Im MDSC	rs117893093	T	G	T	G	0.4385	7.36e-05	0.0418	0.050471	FALSE	FALSE	FALSE	ieu-b-4874	20	36543774	0.000311867	373295	0.81	bladder cancer	TRUE	NA	NA	NA	NA	NA	NA	NA	3.06e-06	20	36543774	1554	0.09362	TRUE	2	1	TRUE
CD33 on Im MDSC	rs1218959	A	C	A	C	0.169	-0.000219523	0.6403	0.631308	FALSE	FALSE	FALSE	ieu-b-4874	13	28193877	0.000140131	373295	0.12	bladder cancer	TRUE	NA	NA	NA	NA	NA	NA	NA	9.62e-06	13	28193877	1554	0.03806	TRUE	2	1	TRUE
CD33 on Im MDSC	rs1421461	C	T	C	T	0.2027	-1.66e-05	0.2169	0.209237	FALSE	FALSE	FALSE	ieu-b-4874	12	106320886	0.000166438	373295	0.92	bladder cancer	TRUE	NA	NA	NA	NA	NA	NA	NA	8.69e-06	12	106320886	1554	0.04543	TRUE	2	1	TRUE
CD33 on Im MDSC	rs1922127	T	C	T	C	-0.3769	0.00024255	0.047	0.151988	FALSE	FALSE	FALSE	ieu-b-4874	10	53348048	0.000188181	373295	0.2	bladder cancer	TRUE	NA	NA	NA	NA	NA	NA	NA	8.13e-06	10	53348048	1554	0.08418	TRUE	2	1	TRUE
CD33 on Im MDSC	rs4567661	C	A	C	A	-0.1856	0.000182501	0.3179	0.348857	FALSE	FALSE	FALSE	ieu-b-4874	15	38786114	0.000142263	373295	0.2	bladder cancer	TRUE	NA	NA	NA	NA	NA	NA	NA	3.24e-06	15	38786114	1554	0.03972	TRUE	2	1	TRUE
CD33 on Im MDSC	rs56043070	A	G	A	G	0.4156	-0.0001301	0.0566	0.071595	FALSE	FALSE	FALSE	ieu-b-4874	1	247719769	0.000262182	373295	0.62	bladder cancer	TRUE	NA	NA	NA	NA	NA	NA	NA	1.52e-07	1	247719769	1554	0.0788	TRUE	2	1	TRUE
CD33 on Im MDSC	rs58483275	T	C	T	C	0.5046	0.000317655	0.0734	0.011192	FALSE	FALSE	FALSE	ieu-b-4874	19	51868443	0.000667703	373295	0.630001	bladder cancer	TRUE	NA	NA	NA	NA	NA	NA	NA	5.21e-12	19	51868443	1554	0.07256	TRUE	2	1	TRUE
CD33 on Im MDSC	rs7245846	A	G	A	G	-1.115	-0.000293284	0.1934	0.354169	FALSE	FALSE	FALSE	ieu-b-4874	19	51731176	0.000141996	373295	0.0389996	bladder cancer	TRUE	NA	NA	NA	NA	NA	NA	NA	6.08e-143	19	51731176	1554	0.0393	TRUE	2	1	TRUE
CD33 on Im MDSC	rs7351079	G	A	G	A	-0.3351	5.26e-05	0.258	0.174167	FALSE	FALSE	FALSE	ieu-b-4874	19	51574038	0.000178302	373295	0.77	bladder cancer	TRUE	NA	NA	NA	NA	NA	NA	NA	5.07e-15	19	51574038	1554	0.0424	TRUE	2	1	TRUE
CD33 on Im MDSC	rs75773078	A	G	A	G	-0.5252	-0.000116823	0.0705	0.0805	FALSE	FALSE	FALSE	ieu-b-4874	19	51742145	0.000254756	373295	0.649999	bladder cancer	TRUE	NA	NA	NA	NA	NA	NA	NA	1.64e-13	19	51742145	1554	0.07057	TRUE	2	1	TRUE
CD33 on Im MDSC	rs77040155	G	C	G	C	-0.3763	-0.000391213	0.0534	0.025566	FALSE	TRUE	FALSE	ieu-b-4874	11	5402836	0.000428778	373295	0.36	bladder cancer	TRUE	NA	NA	NA	NA	NA	NA	NA	9.46e-06	11	5402836	1554	0.08467	TRUE	2	1	TRUE
CD33 on Im MDSC	rs77635331	T	C	T	C	-0.2765	0.000209635	0.0985	0.030105	FALSE	FALSE	FALSE	ieu-b-4874	16	8691661	0.00039521	373295	0.6	bladder cancer	TRUE	NA	NA	NA	NA	NA	NA	NA	6.59e-06	16	8691661	1554	0.06116	TRUE	2	1	TRUE
CD33 on Im MDSC	rs79377141	A	G	A	G	0.3376	0.000186811	0.2008	0.099065	FALSE	FALSE	FALSE	ieu-b-4874	19	51538952	0.000240336	373295	0.44	bladder cancer	TRUE	NA	NA	NA	NA	NA	NA	NA	3.07e-13	19	51538952	1554	0.0459	TRUE	2	1	TRUE
CD33 on Im MDSC	rs79965644	G	T	G	T	0.4811	-0.000153201	0.0296	0.062032	FALSE	FALSE	FALSE	ieu-b-4874	13	79484369	0.000289028	373295	0.6	bladder cancer	TRUE	NA	NA	NA	NA	NA	NA	NA	6.1e-06	13	79484369	1554	0.106	TRUE	2	1	TRUE
CD127 on CD8br	rs10024641	A	G	A	G	0.1143	6.74e-05	0.5082	0.405077	FALSE	FALSE	FALSE	ieu-b-4874	4	188051690	0.000138132	373295	0.630001	bladder cancer	TRUE	NA	NA	NA	NA	NA	NA	NA	8.95e-06	4	188051690	2920	0.0257	TRUE	2	1	TRUE
CD127 on CD8br	rs117239506	A	C	A	C	1.832	0.000370312	0.001	0.018852	FALSE	FALSE	FALSE	ieu-b-4874	12	16351043	0.000518188	373295	0.47	bladder cancer	TRUE	NA	NA	NA	NA	NA	NA	NA	3.32e-06	12	16351043	2920	0.3932	TRUE	2	1	TRUE
CD127 on CD8br	rs13165333	T	C	T	C	0.1984	0.000322101	0.1036	0.151379	FALSE	FALSE	FALSE	ieu-b-4874	5	82275571	0.000188925	373295	0.0879995	bladder cancer	TRUE	NA	NA	NA	NA	NA	NA	NA	2.79e-06	5	82275571	2920	0.04226	TRUE	2	1	TRUE
CD127 on CD8br	rs1377028	G	A	G	A	-0.1222	0.000212702	0.5479	0.49866	FALSE	FALSE	FALSE	ieu-b-4874	4	75738792	0.000135447	373295	0.12	bladder cancer	TRUE	NA	NA	NA	NA	NA	NA	NA	2.77e-06	4	75738792	2920	0.02603	TRUE	2	1	TRUE
CD127 on CD8br	rs148460149	A	G	A	G	0.326	-0.00104032	0.033	0.01267	FALSE	FALSE	FALSE	ieu-b-4874	20	50115542	0.000611138	373295	0.089	bladder cancer	TRUE	NA	NA	NA	NA	NA	NA	NA	9.27e-06	20	50115542	2920	0.07341	TRUE	2	1	TRUE
CD127 on CD8br	rs159608	G	A	G	A	0.1236	-0.000200351	0.3096	0.316776	FALSE	FALSE	FALSE	ieu-b-4874	5	59174103	0.000146155	373295	0.17	bladder cancer	TRUE	NA	NA	NA	NA	NA	NA	NA	9.93e-06	5	59174103	2920	0.02793	TRUE	2	1	TRUE
CD127 on CD8br	rs1911151	C	T	C	T	-0.1953	3.99e-05	0.8719	0.821138	FALSE	FALSE	FALSE	ieu-b-4874	11	60546636	0.000177792	373295	0.82	bladder cancer	TRUE	NA	NA	NA	NA	NA	NA	NA	5.39e-07	11	60546636	2920	0.03888	TRUE	2	1	TRUE
CD127 on CD8br	rs2009425	T	C	T	C	-0.3232	0.000317515	0.033	0.080718	FALSE	FALSE	FALSE	ieu-b-4874	5	174034800	0.000254688	373295	0.21	bladder cancer	TRUE	NA	NA	NA	NA	NA	NA	NA	9.93e-06	5	174034800	2920	0.07302	TRUE	2	1	TRUE
CD127 on CD8br	rs28869816	T	G	T	G	0.2939	-0.000262434	0.0401	0.013527	FALSE	FALSE	FALSE	ieu-b-4874	2	116742575	0.000583791	373295	0.649999	bladder cancer	TRUE	NA	NA	NA	NA	NA	NA	NA	9.23e-06	2	116742575	2920	0.06617	TRUE	2	1	TRUE
CD127 on CD8br	rs3130901	T	A	T	A	-0.18	-0.000127455	0.193	0.360675	FALSE	TRUE	FALSE	ieu-b-4874	6	31419065	0.000140488	373295	0.36	bladder cancer	TRUE	NA	NA	NA	NA	NA	NA	NA	1.98e-07	6	31419065	2920	0.03453	TRUE	2	1	TRUE
CD127 on CD8br	rs457979	A	G	A	G	0.2164	0.000470985	0.9146	0.924276	FALSE	FALSE	FALSE	ieu-b-4874	5	2382270	0.000256658	373295	0.0659994	bladder cancer	TRUE	NA	NA	NA	NA	NA	NA	NA	2.93e-06	5	2382270	2920	0.04618	TRUE	2	1	TRUE
CD127 on CD8br	rs4668705	A	G	A	G	-0.1189	-0.000140119	0.5443	0.431162	FALSE	FALSE	FALSE	ieu-b-4874	2	11152503	0.000136519	373295	0.3	bladder cancer	TRUE	NA	NA	NA	NA	NA	NA	NA	3.58e-06	2	11152503	2920	0.02562	TRUE	2	1	TRUE
CD127 on CD8br	rs4925660	T	C	T	C	-0.2148	-0.000176139	0.0827	0.05093	FALSE	FALSE	FALSE	ieu-b-4874	1	247251150	0.000312459	373295	0.57	bladder cancer	TRUE	NA	NA	NA	NA	NA	NA	NA	7.22e-06	1	247251150	2920	0.04779	TRUE	2	1	TRUE
CD127 on CD8br	rs5770311	G	A	G	A	-0.1216	-4.91e-05	0.3666	0.351755	FALSE	FALSE	FALSE	ieu-b-4874	22	49767656	0.000142733	373295	0.73	bladder cancer	TRUE	NA	NA	NA	NA	NA	NA	NA	7.14e-06	22	49767656	2920	0.02704	TRUE	2	1	TRUE
CD127 on CD8br	rs5770659	G	C	G	C	0.1293	0.000252787	0.6822	0.752997	FALSE	TRUE	FALSE	ieu-b-4874	22	50083852	0.000157336	373295	0.11	bladder cancer	TRUE	NA	NA	NA	NA	NA	NA	NA	3.26e-06	22	50083852	2920	0.02774	TRUE	2	1	TRUE
CD127 on CD8br	rs72824431	C	T	C	T	-0.2416	-0.000203527	0.0647	0.088426	FALSE	FALSE	FALSE	ieu-b-4874	2	104853841	0.00024102	373295	0.4	bladder cancer	TRUE	NA	NA	NA	NA	NA	NA	NA	4.61e-06	2	104853841	2920	0.05262	TRUE	2	1	TRUE
CD127 on CD8br	rs73354288	T	C	T	C	-0.1928	-0.000293218	0.1166	0.094581	FALSE	FALSE	FALSE	ieu-b-4874	17	79157596	0.000232315	373295	0.21	bladder cancer	TRUE	NA	NA	NA	NA	NA	NA	NA	1.4e-06	17	79157596	2920	0.03987	TRUE	2	1	TRUE
CD127 on CD8br	rs73561877	C	G	C	G	0.3813	0.000292252	0.0284	0.012659	FALSE	TRUE	FALSE	ieu-b-4874	19	6368955	0.000605564	373295	0.630001	bladder cancer	TRUE	TRUE	rs73561877	rs74796941	C	G	A	G	9.99e-07	19	6365399	2920	0.07778	TRUE	2	1	TRUE
CD127 on CD8br	rs74785296	A	C	A	C	0.5285	0.000832934	0.0132	0.01391	FALSE	FALSE	FALSE	ieu-b-4874	7	156120842	0.000575414	373295	0.15	bladder cancer	TRUE	NA	NA	NA	NA	NA	NA	NA	2.39e-06	7	156120842	2920	0.1118	TRUE	2	1	TRUE
CD127 on CD8br	rs7643142	T	C	T	C	0.2601	0.000418072	0.0596	0.143554	FALSE	FALSE	FALSE	ieu-b-4874	3	175109345	0.000192702	373295	0.0299999	bladder cancer	TRUE	NA	NA	NA	NA	NA	NA	NA	1.86e-06	3	175109345	2920	0.05444	TRUE	2	1	TRUE
CD127 on CD8br	rs7801342	C	T	C	T	0.1834	0.000154268	0.2342	0.329995	FALSE	FALSE	FALSE	ieu-b-4874	7	31163003	0.0001442	373295	0.28	bladder cancer	TRUE	NA	NA	NA	NA	NA	NA	NA	1.63e-09	7	31163003	2920	0.03032	TRUE	2	1	TRUE
CD127 on CD8br	rs7813990	T	C	T	C	0.1488	-0.000203299	0.2048	0.266011	FALSE	FALSE	FALSE	ieu-b-4874	8	37671140	0.000153566	373295	0.19	bladder cancer	TRUE	NA	NA	NA	NA	NA	NA	NA	4.32e-06	8	37671140	2920	0.03232	TRUE	2	1	TRUE
CD28+ CD45RA+ CD8br %CD8br	rs10025910	T	C	T	C	0.5074	0.000255283	0.0074	0.009879	FALSE	FALSE	FALSE	ieu-b-4874	4	25610903	0.000691923	373295	0.709999	bladder cancer	TRUE	NA	NA	NA	NA	NA	NA	NA	1.21e-06	4	25610903	3440	0.1043	TRUE	2	1	TRUE
CD28+ CD45RA+ CD8br %CD8br	rs10242630	A	G	A	G	0.1978	0.000205213	0.0541	0.077344	FALSE	FALSE	FALSE	ieu-b-4874	7	146469943	0.000253602	373295	0.42	bladder cancer	TRUE	NA	NA	NA	NA	NA	NA	NA	1.53e-06	7	146469943	3440	0.04107	TRUE	2	1	TRUE
CD28+ CD45RA+ CD8br %CD8br	rs1064086	A	G	A	G	-0.103	-0.000192163	0.3275	0.379107	FALSE	FALSE	FALSE	ieu-b-4874	2	237034061	0.000139972	373295	0.17	bladder cancer	TRUE	NA	NA	NA	NA	NA	NA	NA	2.23e-07	2	237034061	3440	0.01985	TRUE	2	1	TRUE
CD28+ CD45RA+ CD8br %CD8br	rs10840675	T	C	T	C	0.1139	0.000154986	0.1624	0.252984	FALSE	FALSE	FALSE	ieu-b-4874	12	17367587	0.000170912	373295	0.36	bladder cancer	TRUE	NA	NA	NA	NA	NA	NA	NA	7.78e-06	12	17367587	3440	0.02544	TRUE	2	1	TRUE
CD28+ CD45RA+ CD8br %CD8br	rs112258643	T	C	T	C	3.271	-0.000472003	0.0001	0.016851	FALSE	FALSE	FALSE	ieu-b-4874	12	55672838	0.000545546	373295	0.39	bladder cancer	TRUE	NA	NA	NA	NA	NA	NA	NA	5.92e-07	12	55672838	3440	0.6538	TRUE	2	1	TRUE
CD28+ CD45RA+ CD8br %CD8br	rs117403703	C	T	C	T	3.043	0.000350308	0.0001	0.013766	FALSE	FALSE	FALSE	ieu-b-4874	6	93203850	0.000584014	373295	0.55	bladder cancer	TRUE	NA	NA	NA	NA	NA	NA	NA	5.73e-06	6	93203850	3440	0.6699	TRUE	2	1	TRUE
CD28+ CD45RA+ CD8br %CD8br	rs117475733	T	C	T	C	1.491	0.00114252	0.0004	0.025278	FALSE	FALSE	FALSE	ieu-b-4874	6	148775706	0.000430255	373295	0.00790005	bladder cancer	TRUE	NA	NA	NA	NA	NA	NA	NA	4.44e-06	6	148775706	3440	0.3243	TRUE	2	1	TRUE
CD28+ CD45RA+ CD8br %CD8br	rs11896593	C	G	C	G	0.1024	8.51e-05	0.3703	0.196898	FALSE	TRUE	FALSE	ieu-b-4874	2	38925155	0.00017039	373295	0.62	bladder cancer	TRUE	NA	NA	NA	NA	NA	NA	NA	2.5e-07	2	38925155	3440	0.01981	TRUE	2	1	TRUE
CD28+ CD45RA+ CD8br %CD8br	rs139580802	T	C	T	C	1.187	-0.000158355	0.001	0.014666	FALSE	FALSE	FALSE	ieu-b-4874	17	76213606	0.000563671	373295	0.780001	bladder cancer	TRUE	NA	NA	NA	NA	NA	NA	NA	9.91e-06	17	76213606	3440	0.2682	TRUE	2	1	TRUE
CD28+ CD45RA+ CD8br %CD8br	rs143788880	A	G	A	G	0.4914	0.000484025	0.0074	0.031078	FALSE	FALSE	FALSE	ieu-b-4874	17	57361218	0.000403193	373295	0.23	bladder cancer	TRUE	NA	NA	NA	NA	NA	NA	NA	6.42e-06	17	57361218	3440	0.1087	TRUE	2	1	TRUE
CD28+ CD45RA+ CD8br %CD8br	rs146741472	A	G	A	G	3.535	0.000103824	0.0001	0.014563	FALSE	FALSE	FALSE	ieu-b-4874	2	120215812	0.000578622	373295	0.86	bladder cancer	TRUE	NA	NA	NA	NA	NA	NA	NA	2.7e-06	2	120215812	3440	0.7519	TRUE	2	1	TRUE
CD28+ CD45RA+ CD8br %CD8br	rs17583875	A	G	A	G	0.9979	-0.00022637	0.0029	0.020833	FALSE	FALSE	FALSE	ieu-b-4874	1	197924770	0.000473128	373295	0.630001	bladder cancer	TRUE	NA	NA	NA	NA	NA	NA	NA	8.82e-09	1	197924770	3440	0.1731	TRUE	2	1	TRUE
CD28+ CD45RA+ CD8br %CD8br	rs182236332	G	A	G	A	4.274	-4.78e-05	0.0001	0.010257	FALSE	FALSE	FALSE	ieu-b-4874	7	124954943	0.000706632	373295	0.95	bladder cancer	TRUE	NA	NA	NA	NA	NA	NA	NA	1.23e-06	7	124954943	3440	0.8797	TRUE	2	1	TRUE
CD28+ CD45RA+ CD8br %CD8br	rs1879612	C	T	C	T	0.08909	0.000240311	0.4751	0.372967	FALSE	FALSE	FALSE	ieu-b-4874	15	99398708	0.000140981	373295	0.0879995	bladder cancer	TRUE	NA	NA	NA	NA	NA	NA	NA	1.6e-06	15	99398708	3440	0.01853	TRUE	2	1	TRUE
CD28+ CD45RA+ CD8br %CD8br	rs1978254	A	G	A	G	-0.1733	0.000339338	0.0592	0.021854	FALSE	FALSE	FALSE	ieu-b-4874	19	57281224	0.000468431	373295	0.47	bladder cancer	TRUE	NA	NA	NA	NA	NA	NA	NA	9.72e-06	19	57281224	3440	0.03911	TRUE	2	1	TRUE
CD28+ CD45RA+ CD8br %CD8br	rs2629824	G	A	G	A	-0.1289	-9.9e-05	0.8225	0.69332	FALSE	FALSE	FALSE	ieu-b-4874	1	114687316	0.000147444	373295	0.5	bladder cancer	TRUE	NA	NA	NA	NA	NA	NA	NA	1.53e-07	1	114687316	3440	0.02451	TRUE	2	1	TRUE
CD28+ CD45RA+ CD8br %CD8br	rs2802930	T	C	T	C	0.4087	1.24e-06	0.9894	0.909637	FALSE	FALSE	FALSE	ieu-b-4874	1	235096612	0.000245206	373295	1	bladder cancer	TRUE	NA	NA	NA	NA	NA	NA	NA	5.61e-06	1	235096612	3440	0.08986	TRUE	2	1	TRUE
CD28+ CD45RA+ CD8br %CD8br	rs28460753	A	G	A	G	0.6077	-3.96e-05	0.0048	0.033021	FALSE	FALSE	FALSE	ieu-b-4874	15	63000142	0.000379526	373295	0.92	bladder cancer	TRUE	TRUE	rs28460753	rs12906971	A	G	A	G	3.12e-06	15	62991760	3440	0.1301	TRUE	2	1	TRUE
CD28+ CD45RA+ CD8br %CD8br	rs28576084	G	T	G	T	0.1012	0.000227706	0.2205	0.271355	FALSE	FALSE	FALSE	ieu-b-4874	14	82062494	0.000151934	373295	0.13	bladder cancer	TRUE	NA	NA	NA	NA	NA	NA	NA	8.05e-06	14	82062494	3440	0.02264	TRUE	2	1	TRUE
CD28+ CD45RA+ CD8br %CD8br	rs34752208	A	G	A	G	0.1011	5.68e-05	0.325	0.309621	FALSE	FALSE	FALSE	ieu-b-4874	9	137165566	0.000178446	373295	0.75	bladder cancer	TRUE	NA	NA	NA	NA	NA	NA	NA	5.89e-07	9	137165566	3440	0.0202	TRUE	2	1	TRUE
CD28+ CD45RA+ CD8br %CD8br	rs5011724	C	T	C	T	-0.09624	-0.000175294	0.3209	0.445088	FALSE	FALSE	FALSE	ieu-b-4874	17	41759061	0.000136792	373295	0.2	bladder cancer	TRUE	NA	NA	NA	NA	NA	NA	NA	2.23e-06	17	41759061	3440	0.02031	TRUE	2	1	TRUE
CD28+ CD45RA+ CD8br %CD8br	rs60220946	T	C	T	C	0.2919	-0.000907988	0.0212	0.018178	FALSE	FALSE	FALSE	ieu-b-4874	1	193505625	0.000543103	373295	0.0949992	bladder cancer	TRUE	NA	NA	NA	NA	NA	NA	NA	7.68e-06	1	193505625	3440	0.06514	TRUE	2	1	TRUE
CD28+ CD45RA+ CD8br %CD8br	rs62572596	T	C	T	C	0.3597	0.000753657	0.0157	0.030038	FALSE	FALSE	FALSE	ieu-b-4874	9	114588604	0.000397382	373295	0.0580003	bladder cancer	TRUE	NA	NA	NA	NA	NA	NA	NA	5.8e-06	9	114588604	3440	0.07921	TRUE	2	1	TRUE
CD28+ CD45RA+ CD8br %CD8br	rs7033084	T	C	T	C	0.0849	6.84e-05	0.5055	0.677538	FALSE	FALSE	FALSE	ieu-b-4874	9	16904641	0.000144575	373295	0.64	bladder cancer	TRUE	NA	NA	NA	NA	NA	NA	NA	9.44e-06	9	16904641	3440	0.01914	TRUE	2	1	TRUE
CD28+ CD45RA+ CD8br %CD8br	rs72723766	C	T	C	T	-2.308	-0.000578224	0.0003	0.015397	FALSE	FALSE	FALSE	ieu-b-4874	4	152131193	0.00056573	373295	0.31	bladder cancer	TRUE	NA	NA	NA	NA	NA	NA	NA	5.69e-06	4	152131193	3440	0.5078	TRUE	2	1	TRUE
CD28+ CD45RA+ CD8br %CD8br	rs73061672	A	T	A	T	0.1863	0.000207256	0.0637	0.041563	FALSE	TRUE	FALSE	ieu-b-4874	7	8326430	0.000353239	373295	0.56	bladder cancer	TRUE	NA	NA	NA	NA	NA	NA	NA	1.75e-06	7	8326430	3440	0.0389	TRUE	2	1	TRUE
CD28+ CD45RA+ CD8br %CD8br	rs76313555	T	C	T	C	0.4644	-0.000303459	0.0083	0.026302	FALSE	FALSE	FALSE	ieu-b-4874	3	59914042	0.000417046	373295	0.47	bladder cancer	TRUE	NA	NA	NA	NA	NA	NA	NA	6.1e-06	3	59914042	3440	0.1025	TRUE	2	1	TRUE
CD28+ CD45RA+ CD8br %CD8br	rs76668354	G	C	G	C	0.5165	-0.000144323	0.0089	0.081705	FALSE	TRUE	FALSE	ieu-b-4874	2	103587624	0.000250572	373295	0.56	bladder cancer	TRUE	NA	NA	NA	NA	NA	NA	NA	3.53e-07	2	103587624	3440	0.1012	TRUE	2	1	TRUE
CD28+ CD45RA+ CD8br %CD8br	rs79638560	A	C	A	C	-1.499	-0.000200863	0.0009	0.015043	FALSE	FALSE	FALSE	ieu-b-4874	4	183402200	0.000561171	373295	0.719999	bladder cancer	TRUE	NA	NA	NA	NA	NA	NA	NA	4.73e-06	4	183402200	3440	0.327	TRUE	2	1	TRUE
CD28+ CD45RA+ CD8br %CD8br	rs9260902	C	T	C	T	-0.117	-0.000149524	0.4702	0.761441	FALSE	FALSE	FALSE	ieu-b-4874	6	29947740	0.000162623	373295	0.36	bladder cancer	TRUE	NA	NA	NA	NA	NA	NA	NA	5.69e-07	6	29947740	3440	0.02335	TRUE	2	1	TRUE
CD28+ CD45RA+ CD8br %CD8br	rs9577271	G	A	G	A	0.1114	-2.97e-05	0.1812	0.160916	FALSE	FALSE	FALSE	ieu-b-4874	13	114096507	0.00018689	373295	0.87	bladder cancer	TRUE	NA	NA	NA	NA	NA	NA	NA	5.46e-06	13	114096507	3440	0.02447	TRUE	2	1	TRUE
CD28+ CD45RA+ CD8br %CD8br	rs9792050	T	G	T	G	-0.1499	-0.000242508	0.8994	0.896919	FALSE	FALSE	FALSE	ieu-b-4874	7	31164655	0.000225162	373295	0.28	bladder cancer	TRUE	NA	NA	NA	NA	NA	NA	NA	1.73e-06	7	31164655	3440	0.03129	TRUE	2	1	TRUE
CD14+ CD16- monocyte AC	rs10094039	G	A	G	A	-0.137	-1.61e-05	0.7531	0.616425	FALSE	FALSE	FALSE	ieu-b-4874	8	130589676	0.000139348	373295	0.91	bladder cancer	TRUE	NA	NA	NA	NA	NA	NA	NA	9.09e-07	8	130589676	3629	0.02784	TRUE	2	1	TRUE
CD14+ CD16- monocyte AC	rs111463078	A	T	A	T	0.3431	0.000517381	0.0263	0.013531	FALSE	TRUE	FALSE	ieu-b-4874	8	2350689	0.000585037	373295	0.38	bladder cancer	TRUE	NA	NA	NA	NA	NA	NA	NA	6.83e-06	8	2350689	3629	0.07615	TRUE	2	1	TRUE
CD14+ CD16- monocyte AC	rs11177104	A	G	A	G	-0.6203	0.000459124	0.0076	0.03298	FALSE	FALSE	FALSE	ieu-b-4874	12	68605883	0.000381836	373295	0.23	bladder cancer	TRUE	NA	NA	NA	NA	NA	NA	NA	4.58e-06	12	68605883	3629	0.1351	TRUE	2	1	TRUE
CD14+ CD16- monocyte AC	rs118111037	T	C	T	C	-1.458	0.000487084	0.0012	0.018592	FALSE	FALSE	FALSE	ieu-b-4874	22	35958024	0.00052675	373295	0.36	bladder cancer	TRUE	NA	NA	NA	NA	NA	NA	NA	6.81e-06	22	35958024	3629	0.3235	TRUE	2	1	TRUE
CD14+ CD16- monocyte AC	rs12501003	G	A	G	A	0.1613	2.48e-05	0.1674	0.076274	FALSE	FALSE	FALSE	ieu-b-4874	4	92510918	0.00025507	373295	0.92	bladder cancer	TRUE	NA	NA	NA	NA	NA	NA	NA	4.45e-07	4	92510918	3629	0.03189	TRUE	2	1	TRUE
CD14+ CD16- monocyte AC	rs13121143	C	T	C	T	0.1703	7.16e-05	0.1536	0.256186	FALSE	FALSE	FALSE	ieu-b-4874	4	190199873	0.00016767	373295	0.67	bladder cancer	TRUE	NA	NA	NA	NA	NA	NA	NA	2.75e-07	4	190199873	3629	0.03307	TRUE	2	1	TRUE
CD14+ CD16- monocyte AC	rs1375493	A	G	A	G	0.1517	0.000150224	0.3781	0.555872	FALSE	FALSE	FALSE	ieu-b-4874	2	182323766	0.000136626	373295	0.27	bladder cancer	TRUE	NA	NA	NA	NA	NA	NA	NA	9.92e-10	2	182323766	3629	0.02476	TRUE	2	1	TRUE
CD14+ CD16- monocyte AC	rs150649461	C	G	C	G	0.2921	0.00026826	0.0459	0.014664	FALSE	TRUE	FALSE	ieu-b-4874	1	92925654	0.000578842	373295	0.64	bladder cancer	TRUE	NA	NA	NA	NA	NA	NA	NA	4.83e-06	1	92925654	3629	0.06379	TRUE	2	1	TRUE
CD14+ CD16- monocyte AC	rs17465420	C	T	C	T	0.1094	-5.78e-05	0.4241	0.586729	FALSE	FALSE	FALSE	ieu-b-4874	1	38398588	0.000137093	373295	0.67	bladder cancer	TRUE	NA	NA	NA	NA	NA	NA	NA	9.53e-06	1	38398588	3629	0.02467	TRUE	2	1	TRUE
CD14+ CD16- monocyte AC	rs183716470	G	T	G	T	-0.2044	-0.000508513	0.081	0.032961	FALSE	FALSE	FALSE	ieu-b-4874	3	81313690	0.000380017	373295	0.18	bladder cancer	TRUE	TRUE	rs183716470	rs77506560	G	T	C	T	6.32e-06	3	81299703	3629	0.04519	TRUE	2	1	TRUE
CD14+ CD16- monocyte AC	rs189962728	C	T	C	T	-2.572	0.000882244	0.0004	0.017953	FALSE	FALSE	FALSE	ieu-b-4874	4	58124445	0.00051278	373295	0.0850002	bladder cancer	TRUE	NA	NA	NA	NA	NA	NA	NA	5.67e-06	4	58124445	3629	0.5658	TRUE	2	1	TRUE
CD14+ CD16- monocyte AC	rs2120231	G	T	G	T	-0.1154	0.000178021	0.5141	0.502033	FALSE	FALSE	FALSE	ieu-b-4874	17	1015996	0.000136384	373295	0.19	bladder cancer	TRUE	NA	NA	NA	NA	NA	NA	NA	1.82e-06	17	1015996	3629	0.02415	TRUE	2	1	TRUE
CD14+ CD16- monocyte AC	rs2247998	A	G	A	G	-0.1145	0.000198342	0.6503	0.743341	FALSE	FALSE	FALSE	ieu-b-4874	16	85801445	0.000155364	373295	0.2	bladder cancer	TRUE	NA	NA	NA	NA	NA	NA	NA	6.7e-06	16	85801445	3629	0.0254	TRUE	2	1	TRUE
CD14+ CD16- monocyte AC	rs2418135	A	G	A	G	-0.1487	0.000166543	0.5236	0.520085	FALSE	FALSE	FALSE	ieu-b-4874	9	113901309	0.000135616	373295	0.22	bladder cancer	TRUE	NA	NA	NA	NA	NA	NA	NA	1.16e-09	9	113901309	3629	0.02438	TRUE	2	1	TRUE
CD14+ CD16- monocyte AC	rs28437286	G	A	G	A	-0.3633	0.00107087	0.0222	0.026048	FALSE	FALSE	FALSE	ieu-b-4874	21	43063279	0.000467081	373295	0.0219999	bladder cancer	TRUE	NA	NA	NA	NA	NA	NA	NA	8.33e-06	21	43063279	3629	0.08142	TRUE	2	1	TRUE
CD14+ CD16- monocyte AC	rs310730	C	T	C	T	0.3004	0.00028032	0.0338	0.089306	FALSE	FALSE	FALSE	ieu-b-4874	3	4328811	0.000236854	373295	0.24	bladder cancer	TRUE	NA	NA	NA	NA	NA	NA	NA	5.91e-06	3	4328811	3629	0.06623	TRUE	2	1	TRUE
CD14+ CD16- monocyte AC	rs41331448	G	A	G	A	0.7646	-0.0013028	0.0056	0.011711	FALSE	FALSE	FALSE	ieu-b-4874	13	21289312	0.000656277	373295	0.0470002	bladder cancer	TRUE	NA	NA	NA	NA	NA	NA	NA	3.47e-06	13	21289312	3629	0.1645	TRUE	2	1	TRUE
CD14+ CD16- monocyte AC	rs536943	G	A	G	A	-0.1442	-5.02e-05	0.1637	0.112655	FALSE	FALSE	FALSE	ieu-b-4874	3	173213883	0.000213614	373295	0.81	bladder cancer	TRUE	NA	NA	NA	NA	NA	NA	NA	7.78e-06	3	173213883	3629	0.03221	TRUE	2	1	TRUE
CD14+ CD16- monocyte AC	rs55779804	C	G	C	G	-0.1931	0.000350928	0.0805	0.051264	FALSE	TRUE	FALSE	ieu-b-4874	19	6371660	0.000306429	373295	0.25	bladder cancer	TRUE	NA	NA	NA	NA	NA	NA	NA	7.37e-06	19	6371660	3629	0.04302	TRUE	2	1	TRUE
CD14+ CD16- monocyte AC	rs56010301	T	C	T	C	-0.1354	-0.000132449	0.2097	0.159934	FALSE	FALSE	FALSE	ieu-b-4874	5	52645510	0.000184699	373295	0.47	bladder cancer	TRUE	NA	NA	NA	NA	NA	NA	NA	4.34e-06	5	52645510	3629	0.02942	TRUE	2	1	TRUE
CD14+ CD16- monocyte AC	rs58943387	G	T	G	T	-0.1471	-0.000162243	0.1768	0.156788	FALSE	FALSE	FALSE	ieu-b-4874	3	190720967	0.000186436	373295	0.38	bladder cancer	TRUE	NA	NA	NA	NA	NA	NA	NA	2.9e-06	3	190720967	3629	0.0314	TRUE	2	1	TRUE
CD14+ CD16- monocyte AC	rs613224	C	T	C	T	0.3132	0.000585921	0.0366	0.015569	FALSE	FALSE	FALSE	ieu-b-4874	8	2803266	0.000551917	373295	0.29	bladder cancer	TRUE	NA	NA	NA	NA	NA	NA	NA	6.53e-07	8	2803266	3629	0.06285	TRUE	2	1	TRUE
CD14+ CD16- monocyte AC	rs78355921	C	G	C	G	-0.1946	-0.000194331	0.0915	0.038097	FALSE	TRUE	FALSE	ieu-b-4874	1	159941852	0.000366923	373295	0.6	bladder cancer	TRUE	NA	NA	NA	NA	NA	NA	NA	2.65e-06	1	159941852	3629	0.04137	TRUE	2	1	TRUE
CD14+ CD16- monocyte AC	rs8076666	G	A	G	A	0.1284	-0.00030696	0.7778	0.892736	FALSE	FALSE	FALSE	ieu-b-4874	17	78223817	0.000218316	373295	0.16	bladder cancer	TRUE	NA	NA	NA	NA	NA	NA	NA	7.82e-06	17	78223817	3629	0.02869	TRUE	2	1	TRUE
CD14+ CD16- monocyte AC	rs9599503	C	T	C	T	-0.1276	-0.000205649	0.2827	0.143562	FALSE	FALSE	FALSE	ieu-b-4874	13	35314819	0.000195434	373295	0.29	bladder cancer	TRUE	NA	NA	NA	NA	NA	NA	NA	1.68e-06	13	35314819	3629	0.02661	TRUE	2	1	TRUE
CD39+ CD4+ AC	rs1002938	T	A	T	A	-0.275	0.000663632	0.0776	0.03865	FALSE	TRUE	FALSE	ieu-b-4874	10	99461284	0.000371648	373295	0.0739997	bladder cancer	TRUE	NA	NA	NA	NA	NA	NA	NA	2.12e-08	10	99461284	3408	0.04897	TRUE	2	1	TRUE
CD39+ CD4+ AC	rs10800381	T	C	T	C	0.1562	-0.000178745	0.1643	0.199577	FALSE	FALSE	FALSE	ieu-b-4874	1	168744353	0.000169429	373295	0.29	bladder cancer	TRUE	NA	NA	NA	NA	NA	NA	NA	9.37e-06	1	168744353	3408	0.03519	TRUE	2	1	TRUE
CD39+ CD4+ AC	rs10882324	T	C	T	C	-0.1207	-0.000257599	0.3498	0.298899	FALSE	FALSE	FALSE	ieu-b-4874	10	82674931	0.000156049	373295	0.0990011	bladder cancer	TRUE	NA	NA	NA	NA	NA	NA	NA	4.96e-06	10	82674931	3408	0.0264	TRUE	2	1	TRUE
CD39+ CD4+ AC	rs10882701	C	A	C	A	-0.4118	0.000317478	0.5139	0.589843	FALSE	FALSE	FALSE	ieu-b-4874	10	97741071	0.000142525	373295	0.0259998	bladder cancer	TRUE	NA	NA	NA	NA	NA	NA	NA	3.85e-59	10	97741071	3408	0.0249	TRUE	2	1	TRUE
CD39+ CD4+ AC	rs112392069	T	A	T	A	0.2664	-0.000788426	0.0491	0.013407	FALSE	TRUE	FALSE	ieu-b-4874	10	98925325	0.000638373	373295	0.22	bladder cancer	TRUE	NA	NA	NA	NA	NA	NA	NA	7.02e-06	10	98925325	3408	0.05919	TRUE	2	1	TRUE
CD39+ CD4+ AC	rs113087753	A	G	A	G	0.2554	-0.000388975	0.0524	0.029526	FALSE	FALSE	FALSE	ieu-b-4874	7	80556308	0.000400985	373295	0.33	bladder cancer	TRUE	NA	NA	NA	NA	NA	NA	NA	6.27e-06	7	80556308	3408	0.05646	TRUE	2	1	TRUE
CD39+ CD4+ AC	rs114844216	C	T	C	T	0.6311	-7.38e-05	0.0459	0.012363	FALSE	FALSE	FALSE	ieu-b-4874	10	98158952	0.000613659	373295	0.9	bladder cancer	TRUE	NA	NA	NA	NA	NA	NA	NA	2.66e-25	10	98158952	3408	0.06024	TRUE	2	1	TRUE
CD39+ CD4+ AC	rs11598645	C	T	C	T	-0.6196	-0.000631196	0.011	0.02222	FALSE	FALSE	FALSE	ieu-b-4874	10	68351521	0.000474405	373295	0.18	bladder cancer	TRUE	NA	NA	NA	NA	NA	NA	NA	5.74e-06	10	68351521	3408	0.1364	TRUE	2	1	TRUE
CD39+ CD4+ AC	rs11718018	C	T	C	T	-0.1208	-0.000252134	0.4134	0.380878	FALSE	FALSE	FALSE	ieu-b-4874	3	60374028	0.000139977	373295	0.0719996	bladder cancer	TRUE	TRUE	rs11718018	rs9868281	C	T	T	C	3.18e-06	3	60364770	3408	0.02589	TRUE	2	1	TRUE
CD39+ CD4+ AC	rs12778797	C	T	C	T	0.2544	0.000147386	0.3841	0.395699	FALSE	FALSE	FALSE	ieu-b-4874	10	96998688	0.000138289	373295	0.29	bladder cancer	TRUE	NA	NA	NA	NA	NA	NA	NA	3.12e-21	10	96998688	3408	0.02672	TRUE	2	1	TRUE
CD39+ CD4+ AC	rs138807420	T	A	T	A	1.022	-0.000292686	0.0034	0.019271	FALSE	TRUE	FALSE	ieu-b-4874	5	6231929	0.000509304	373295	0.57	bladder cancer	TRUE	NA	NA	NA	NA	NA	NA	NA	5.82e-07	5	6231929	3408	0.204	TRUE	2	1	TRUE
CD39+ CD4+ AC	rs139577399	C	T	C	T	-0.3243	0.000436215	0.0414	0.012121	FALSE	FALSE	FALSE	ieu-b-4874	7	23203415	0.000684766	373295	0.52	bladder cancer	TRUE	NA	NA	NA	NA	NA	NA	NA	4.69e-07	7	23203415	3408	0.06424	TRUE	2	1	TRUE
CD39+ CD4+ AC	rs140503524	T	C	T	C	-1.428	-0.00125016	0.0021	0.024595	FALSE	FALSE	FALSE	ieu-b-4874	11	44646709	0.00047288	373295	0.00819993	bladder cancer	TRUE	NA	NA	NA	NA	NA	NA	NA	3.49e-06	11	44646709	3408	0.3074	TRUE	2	1	TRUE
CD39+ CD4+ AC	rs1410600	T	C	T	C	-0.2402	8.44e-05	0.4073	0.497234	FALSE	FALSE	FALSE	ieu-b-4874	10	97070694	0.000135311	373295	0.53	bladder cancer	TRUE	NA	NA	NA	NA	NA	NA	NA	1.2e-19	10	97070694	3408	0.02632	TRUE	2	1	TRUE
CD39+ CD4+ AC	rs145557266	G	A	G	A	0.7936	-0.000485942	0.021	0.018934	FALSE	FALSE	FALSE	ieu-b-4874	10	95850055	0.000507999	373295	0.34	bladder cancer	TRUE	NA	NA	NA	NA	NA	NA	NA	2.46e-18	10	95850055	3408	0.09034	TRUE	2	1	TRUE
CD39+ CD4+ AC	rs149951966	C	T	C	T	0.1983	-5.73e-05	0.1034	0.195957	FALSE	FALSE	FALSE	ieu-b-4874	17	41137136	0.000176746	373295	0.75	bladder cancer	TRUE	NA	NA	NA	NA	NA	NA	NA	4.99e-06	17	41137136	3408	0.04337	TRUE	2	1	TRUE
CD39+ CD4+ AC	rs17091864	G	A	G	A	0.5315	0.000102428	0.0123	0.01693	FALSE	FALSE	FALSE	ieu-b-4874	14	57105524	0.000525784	373295	0.85	bladder cancer	TRUE	TRUE	rs17091864	rs72711234	G	A	A	G	9.88e-06	14	57103379	3408	0.1201	TRUE	2	1	TRUE
CD39+ CD4+ AC	rs2251521	T	C	T	C	-0.199	-6.58e-05	0.1021	0.207094	FALSE	FALSE	FALSE	ieu-b-4874	10	109471331	0.000167876	373295	0.7	bladder cancer	TRUE	NA	NA	NA	NA	NA	NA	NA	3.36e-06	10	109471331	3408	0.04274	TRUE	2	1	TRUE
CD39+ CD4+ AC	rs35163827	G	A	G	A	-0.3193	-9.21e-05	0.0392	0.0161	FALSE	FALSE	FALSE	ieu-b-4874	8	9606332	0.000537036	373295	0.86	bladder cancer	TRUE	NA	NA	NA	NA	NA	NA	NA	7.73e-06	8	9606332	3408	0.07127	TRUE	2	1	TRUE
CD39+ CD4+ AC	rs4321083	A	G	A	G	0.156	-0.000283732	0.2139	0.255382	FALSE	FALSE	FALSE	ieu-b-4874	13	84031916	0.00015678	373295	0.0700003	bladder cancer	TRUE	NA	NA	NA	NA	NA	NA	NA	7.08e-07	13	84031916	3408	0.03139	TRUE	2	1	TRUE
CD39+ CD4+ AC	rs57516532	T	C	T	C	0.3142	0.000148488	0.0342	0.035847	FALSE	FALSE	FALSE	ieu-b-4874	7	1172869	0.000364178	373295	0.68	bladder cancer	TRUE	NA	NA	NA	NA	NA	NA	NA	7.26e-06	7	1172869	3408	0.06993	TRUE	2	1	TRUE
CD39+ CD4+ AC	rs59143200	C	T	C	T	-0.1181	0.000149133	0.4325	0.510228	FALSE	FALSE	FALSE	ieu-b-4874	19	1092511	0.000145682	373295	0.31	bladder cancer	TRUE	NA	NA	NA	NA	NA	NA	NA	5.48e-06	19	1092511	3408	0.02594	TRUE	2	1	TRUE
CD39+ CD4+ AC	rs62421103	T	G	T	G	0.2313	-0.000224604	0.0712	0.061952	FALSE	FALSE	FALSE	ieu-b-4874	6	113160344	0.00028088	373295	0.42	bladder cancer	TRUE	NA	NA	NA	NA	NA	NA	NA	4.73e-06	6	113160344	3408	0.05047	TRUE	2	1	TRUE
CD39+ CD4+ AC	rs72968495	C	T	C	T	2.034	-0.000340011	0.0007	0.017386	FALSE	FALSE	FALSE	ieu-b-4874	6	119638473	0.000528884	373295	0.52	bladder cancer	TRUE	NA	NA	NA	NA	NA	NA	NA	5.37e-06	6	119638473	3408	0.4463	TRUE	2	1	TRUE
CD39+ CD4+ AC	rs74791100	C	T	C	T	0.5331	-0.000723678	0.0123	0.010219	FALSE	FALSE	FALSE	ieu-b-4874	9	86052403	0.000685548	373295	0.29	bladder cancer	TRUE	NA	NA	NA	NA	NA	NA	NA	5.28e-06	9	86052403	3408	0.1169	TRUE	2	1	TRUE
CD39+ CD4+ AC	rs78027772	A	G	A	G	0.2207	-0.00011511	0.0848	0.114622	FALSE	FALSE	FALSE	ieu-b-4874	7	126248228	0.000217788	373295	0.6	bladder cancer	TRUE	NA	NA	NA	NA	NA	NA	NA	2.15e-06	7	126248228	3408	0.04649	TRUE	2	1	TRUE
CD39+ CD4+ AC	rs8076447	A	G	A	G	0.1441	-1.27e-05	0.2515	0.175432	FALSE	FALSE	FALSE	ieu-b-4874	17	75229883	0.000179186	373295	0.94	bladder cancer	TRUE	NA	NA	NA	NA	NA	NA	NA	7.48e-07	17	75229883	3408	0.02906	TRUE	2	1	TRUE
CD39+ CD4+ AC	rs821702	G	A	G	A	-0.1393	-0.000187155	0.7525	0.634056	FALSE	FALSE	FALSE	ieu-b-4874	10	108095070	0.000140462	373295	0.18	bladder cancer	TRUE	NA	NA	NA	NA	NA	NA	NA	2.08e-06	10	108095070	3408	0.0293	TRUE	2	1	TRUE
CD33 on CD33dim HLA DR+ CD11b-	rs10033650	T	G	T	G	0.2734	-0.000191615	0.1083	0.070594	FALSE	FALSE	FALSE	ieu-b-4874	4	53954014	0.000264666	373295	0.47	bladder cancer	TRUE	NA	NA	NA	NA	NA	NA	NA	1.6e-06	4	53954014	1634	0.05678	TRUE	2	1	TRUE
CD33 on CD33dim HLA DR+ CD11b-	rs10869456	G	A	G	A	-0.2539	0.000428117	0.8767	0.783455	FALSE	FALSE	FALSE	ieu-b-4874	9	77499330	0.000164152	373295	0.00909997	bladder cancer	TRUE	NA	NA	NA	NA	NA	NA	NA	3.94e-06	9	77499330	1634	0.05483	TRUE	2	1	TRUE
CD33 on CD33dim HLA DR+ CD11b-	rs113460642	T	C	T	C	0.3152	0.000156219	0.0725	0.023724	FALSE	FALSE	FALSE	ieu-b-4874	8	66816831	0.000456904	373295	0.73	bladder cancer	TRUE	TRUE	rs113460642	rs113944933	T	C	A	G	9.99e-06	8	66569270	1634	0.07113	TRUE	2	1	TRUE
CD33 on CD33dim HLA DR+ CD11b-	rs138564050	G	A	G	A	-0.2489	-0.000259702	0.1209	0.139788	FALSE	FALSE	FALSE	ieu-b-4874	18	2873692	0.000198141	373295	0.19	bladder cancer	TRUE	NA	NA	NA	NA	NA	NA	NA	6.1e-06	18	2873692	1634	0.05484	TRUE	2	1	TRUE
CD33 on CD33dim HLA DR+ CD11b-	rs139876813	T	C	T	C	-0.2801	-2.25e-05	0.1092	0.104975	FALSE	FALSE	FALSE	ieu-b-4874	17	2689271	0.000226812	373295	0.92	bladder cancer	TRUE	NA	NA	NA	NA	NA	NA	NA	5.84e-07	17	2689271	1634	0.05585	TRUE	2	1	TRUE
CD33 on CD33dim HLA DR+ CD11b-	rs1801274	G	A	G	A	-0.261	-0.000227068	0.3299	0.529944	FALSE	FALSE	FALSE	ieu-b-4874	1	161479745	0.000135565	373295	0.0940005	bladder cancer	TRUE	NA	NA	NA	NA	NA	NA	NA	1.84e-11	1	161479745	1634	0.03857	TRUE	2	1	TRUE
CD33 on CD33dim HLA DR+ CD11b-	rs187981347	T	A	T	A	-0.4994	-7.89e-05	0.0303	0.024682	FALSE	TRUE	FALSE	ieu-b-4874	5	172080662	0.00044838	373295	0.86	bladder cancer	TRUE	NA	NA	NA	NA	NA	NA	NA	2.16e-06	5	172080662	1634	0.105	TRUE	2	1	TRUE
CD33 on CD33dim HLA DR+ CD11b-	rs35305059	G	A	G	A	0.1619	-0.000178518	0.5477	0.404361	FALSE	FALSE	FALSE	ieu-b-4874	12	128658240	0.000138672	373295	0.2	bladder cancer	TRUE	NA	NA	NA	NA	NA	NA	NA	5.66e-06	12	128658240	1634	0.03555	TRUE	2	1	TRUE
CD33 on CD33dim HLA DR+ CD11b-	rs3865444	A	C	A	C	-1.119	-0.000269157	0.2121	0.323514	FALSE	FALSE	FALSE	ieu-b-4874	19	51727962	0.000144374	373295	0.0619998	bladder cancer	TRUE	NA	NA	NA	NA	NA	NA	NA	2.4e-183	19	51727962	1634	0.03392	TRUE	2	1	TRUE
CD33 on CD33dim HLA DR+ CD11b-	rs4442789	T	C	T	C	0.2086	5.87e-05	0.8048	0.777329	FALSE	FALSE	FALSE	ieu-b-4874	15	98373329	0.000163959	373295	0.719999	bladder cancer	TRUE	NA	NA	NA	NA	NA	NA	NA	6.58e-06	15	98373329	1634	0.04613	TRUE	2	1	TRUE
CD33 on CD33dim HLA DR+ CD11b-	rs4802858	C	T	C	T	-0.188	-0.000194767	0.571	0.562259	FALSE	FALSE	FALSE	ieu-b-4874	19	52253150	0.000137639	373295	0.16	bladder cancer	TRUE	NA	NA	NA	NA	NA	NA	NA	2.06e-07	19	52253150	1634	0.03603	TRUE	2	1	TRUE
CD33 on CD33dim HLA DR+ CD11b-	rs558625031	A	G	A	G	-0.6956	-0.000137834	0.0483	0.02711	FALSE	FALSE	FALSE	ieu-b-4874	19	51858911	0.000467188	373295	0.77	bladder cancer	TRUE	NA	NA	NA	NA	NA	NA	NA	1.96e-17	19	51858911	1634	0.08096	TRUE	2	1	TRUE
CD33 on CD33dim HLA DR+ CD11b-	rs58301181	G	C	G	C	-0.4079	-0.000350038	0.0872	0.106919	FALSE	TRUE	FALSE	ieu-b-4874	19	52097261	0.00021834	373295	0.11	bladder cancer	TRUE	NA	NA	NA	NA	NA	NA	NA	1.81e-10	19	52097261	1634	0.06357	TRUE	2	1	TRUE
CD33 on CD33dim HLA DR+ CD11b-	rs6100482	G	A	G	A	-0.2023	-0.000301399	0.2576	0.191928	FALSE	FALSE	FALSE	ieu-b-4874	20	58103645	0.00017426	373295	0.0840001	bladder cancer	TRUE	NA	NA	NA	NA	NA	NA	NA	5.33e-07	20	58103645	1634	0.04019	TRUE	2	1	TRUE
CD33 on CD33dim HLA DR+ CD11b-	rs73051934	G	A	G	A	-0.6094	-8.47e-06	0.0278	0.019567	FALSE	FALSE	FALSE	ieu-b-4874	19	48582916	0.000513623	373295	0.99	bladder cancer	TRUE	NA	NA	NA	NA	NA	NA	NA	7.88e-09	19	48582916	1634	0.105	TRUE	2	1	TRUE
CD33 on CD33dim HLA DR+ CD11b-	rs7351079	G	A	G	A	-0.3832	5.26e-05	0.2708	0.174167	FALSE	FALSE	FALSE	ieu-b-4874	19	51574038	0.000178302	373295	0.77	bladder cancer	TRUE	NA	NA	NA	NA	NA	NA	NA	2.91e-21	19	51574038	1634	0.03992	TRUE	2	1	TRUE
CD33 on CD33dim HLA DR+ CD11b-	rs75216873	G	A	G	A	-0.345	0.00034699	0.0621	0.018895	FALSE	FALSE	FALSE	ieu-b-4874	14	53742598	0.00050008	373295	0.49	bladder cancer	TRUE	NA	NA	NA	NA	NA	NA	NA	3.21e-06	14	53742598	1634	0.07384	TRUE	2	1	TRUE
CD33 on CD33dim HLA DR+ CD11b-	rs76647540	T	A	T	A	-0.237	7.69e-05	0.1359	0.134133	FALSE	TRUE	FALSE	ieu-b-4874	19	51088199	0.000201654	373295	0.7	bladder cancer	TRUE	NA	NA	NA	NA	NA	NA	NA	5.85e-06	19	51088199	1634	0.05213	TRUE	2	1	TRUE
CD33 on CD33dim HLA DR+ CD11b-	rs7798098	T	C	T	C	0.2453	5.41e-06	0.1233	0.1292	FALSE	FALSE	FALSE	ieu-b-4874	7	36494338	0.000202263	373295	0.98	bladder cancer	TRUE	NA	NA	NA	NA	NA	NA	NA	7.44e-06	7	36494338	1634	0.05456	TRUE	2	1	TRUE
CD33 on CD33dim HLA DR+ CD11b-	rs78949787	T	C	T	C	0.2977	-6.3e-05	0.5535	0.536681	FALSE	FALSE	FALSE	ieu-b-4874	19	51591138	0.00013852	373295	0.649999	bladder cancer	TRUE	NA	NA	NA	NA	NA	NA	NA	1.33e-16	19	51591138	1634	0.03561	TRUE	2	1	TRUE
CD33 on CD33dim HLA DR+ CD11b-	rs9493075	A	G	A	G	-0.3934	0.000135652	0.0584	0.084704	FALSE	FALSE	FALSE	ieu-b-4874	6	132047934	0.000243314	373295	0.58	bladder cancer	TRUE	TRUE	rs9493075	rs7738667	A	G	A	T	1.19e-06	6	132038487	1634	0.0807	TRUE	2	1	TRUE
CM CD8br %CD8br	rs10035567	A	T	A	T	-0.1854	0.000216993	0.0992	0.03944	FALSE	TRUE	FALSE	ieu-b-4874	5	173005364	0.000349375	373295	0.53	bladder cancer	TRUE	NA	NA	NA	NA	NA	NA	NA	7.03e-06	5	173005364	3427	0.04119	TRUE	2	1	TRUE
CM CD8br %CD8br	rs116515477	G	A	G	A	0.4004	0.000141125	0.0239	0.020261	FALSE	FALSE	FALSE	ieu-b-4874	3	68134416	0.000498929	373295	0.780001	bladder cancer	TRUE	NA	NA	NA	NA	NA	NA	NA	1.42e-06	3	68134416	3427	0.0829	TRUE	2	1	TRUE
CM CD8br %CD8br	rs116858348	G	T	G	T	0.5202	0.000627236	0.0117	0.038266	FALSE	FALSE	FALSE	ieu-b-4874	10	92780623	0.000355705	373295	0.0779992	bladder cancer	TRUE	NA	NA	NA	NA	NA	NA	NA	5.2e-06	10	92780623	3427	0.114	TRUE	2	1	TRUE
CM CD8br %CD8br	rs117299036	T	G	T	G	0.5813	-0.00015795	0.0099	0.016186	FALSE	FALSE	FALSE	ieu-b-4874	7	17645647	0.000538716	373295	0.77	bladder cancer	TRUE	NA	NA	NA	NA	NA	NA	NA	4.27e-06	7	17645647	3427	0.1262	TRUE	2	1	TRUE
CM CD8br %CD8br	rs11887842	T	C	T	C	-0.1755	0.000107109	0.1224	0.084803	FALSE	FALSE	FALSE	ieu-b-4874	2	102839478	0.000242666	373295	0.66	bladder cancer	TRUE	NA	NA	NA	NA	NA	NA	NA	8.97e-06	2	102839478	3427	0.03947	TRUE	2	1	TRUE
CM CD8br %CD8br	rs13037846	T	C	T	C	-0.2959	0.000300881	0.0363	0.022747	FALSE	FALSE	FALSE	ieu-b-4874	20	59379480	0.000453325	373295	0.51	bladder cancer	TRUE	NA	NA	NA	NA	NA	NA	NA	9.04e-06	20	59379480	3427	0.06656	TRUE	2	1	TRUE
CM CD8br %CD8br	rs16878206	G	A	G	A	0.1422	5.87e-05	0.1911	0.247483	FALSE	FALSE	FALSE	ieu-b-4874	5	59816794	0.000156566	373295	0.709999	bladder cancer	TRUE	NA	NA	NA	NA	NA	NA	NA	9.92e-06	5	59816794	3427	0.03213	TRUE	2	1	TRUE
CM CD8br %CD8br	rs16881729	T	C	T	C	0.248	0.000174539	0.0527	0.053519	FALSE	FALSE	FALSE	ieu-b-4874	4	29389538	0.000301005	373295	0.56	bladder cancer	TRUE	NA	NA	NA	NA	NA	NA	NA	8.44e-06	4	29389538	3427	0.05561	TRUE	2	1	TRUE
CM CD8br %CD8br	rs183732116	A	G	A	G	0.3128	-0.000195929	0.0427	0.085093	FALSE	FALSE	FALSE	ieu-b-4874	2	168003496	0.000242277	373295	0.42	bladder cancer	TRUE	TRUE	rs183732116	rs1155283	A	G	C	T	2.8e-06	2	168003021	3427	0.06665	TRUE	2	1	TRUE
CM CD8br %CD8br	rs2040680	C	T	C	T	-0.3202	-2.14e-05	0.9718	0.941182	FALSE	FALSE	FALSE	ieu-b-4874	7	88785449	0.000292816	373295	0.94	bladder cancer	TRUE	NA	NA	NA	NA	NA	NA	NA	9.9e-06	7	88785449	3427	0.07234	TRUE	2	1	TRUE
CM CD8br %CD8br	rs2123414	G	A	G	A	0.2645	-0.000490229	0.0455	0.06255	FALSE	FALSE	FALSE	ieu-b-4874	10	130834276	0.000278935	373295	0.0790005	bladder cancer	TRUE	NA	NA	NA	NA	NA	NA	NA	8.67e-06	10	130834276	3427	0.05938	TRUE	2	1	TRUE
CM CD8br %CD8br	rs2424193	G	A	G	A	0.3458	-0.000142737	0.0308	0.035925	FALSE	FALSE	FALSE	ieu-b-4874	20	18417321	0.000376226	373295	0.7	bladder cancer	TRUE	NA	NA	NA	NA	NA	NA	NA	1.28e-06	20	18417321	3427	0.07126	TRUE	2	1	TRUE
CM CD8br %CD8br	rs2713981	G	A	G	A	0.1176	7.34e-05	0.6526	0.746843	FALSE	FALSE	FALSE	ieu-b-4874	17	70743094	0.000156165	373295	0.64	bladder cancer	TRUE	NA	NA	NA	NA	NA	NA	NA	7.01e-06	17	70743094	3427	0.02613	TRUE	2	1	TRUE
CM CD8br %CD8br	rs2840005	C	T	C	T	0.1519	0.000102143	0.1722	0.12893	FALSE	FALSE	FALSE	ieu-b-4874	19	56314899	0.000202347	373295	0.61	bladder cancer	TRUE	NA	NA	NA	NA	NA	NA	NA	2.79e-06	19	56314899	3427	0.03237	TRUE	2	1	TRUE
CM CD8br %CD8br	rs2866112	C	G	C	G	-0.2005	-7.22e-05	0.8971	0.883579	FALSE	TRUE	FALSE	ieu-b-4874	19	54310961	0.000210599	373295	0.73	bladder cancer	TRUE	NA	NA	NA	NA	NA	NA	NA	7.93e-07	19	54310961	3427	0.04054	TRUE	2	1	TRUE
CM CD8br %CD8br	rs350280	G	A	G	A	-0.1208	-7.42e-06	0.4316	0.318913	FALSE	FALSE	FALSE	ieu-b-4874	16	12231997	0.000145281	373295	0.96	bladder cancer	TRUE	NA	NA	NA	NA	NA	NA	NA	2.64e-06	16	12231997	3427	0.02566	TRUE	2	1	TRUE
CM CD8br %CD8br	rs35069110	A	G	A	G	-0.1233	0.000150941	0.4613	0.492192	FALSE	FALSE	FALSE	ieu-b-4874	7	157454257	0.000135733	373295	0.27	bladder cancer	TRUE	NA	NA	NA	NA	NA	NA	NA	6.84e-07	7	157454257	3427	0.02478	TRUE	2	1	TRUE
CM CD8br %CD8br	rs35121986	C	T	C	T	0.2568	0.00014988	0.0522	0.113451	FALSE	FALSE	FALSE	ieu-b-4874	2	187690214	0.000213405	373295	0.48	bladder cancer	TRUE	NA	NA	NA	NA	NA	NA	NA	9.71e-06	2	187690214	3427	0.05797	TRUE	2	1	TRUE
CM CD8br %CD8br	rs4796089	C	T	C	T	0.1638	-0.000365023	0.1344	0.083407	FALSE	FALSE	FALSE	ieu-b-4874	17	33814758	0.000244328	373295	0.14	bladder cancer	TRUE	NA	NA	NA	NA	NA	NA	NA	8.97e-06	17	33814758	3427	0.03683	TRUE	2	1	TRUE
CM CD8br %CD8br	rs4868220	G	A	G	A	-0.113	-0.000165756	0.5455	0.411774	FALSE	FALSE	FALSE	ieu-b-4874	5	172266325	0.000137188	373295	0.23	bladder cancer	TRUE	NA	NA	NA	NA	NA	NA	NA	4.62e-06	5	172266325	3427	0.02463	TRUE	2	1	TRUE
CM CD8br %CD8br	rs541367304	A	G	A	G	-1.186	4.45e-05	0.0032	0.020182	FALSE	FALSE	FALSE	ieu-b-4874	1	198283058	0.000524657	373295	0.93	bladder cancer	TRUE	NA	NA	NA	NA	NA	NA	NA	4.95e-06	1	198283058	3427	0.2593	TRUE	2	1	TRUE
CM CD8br %CD8br	rs55699240	C	G	C	G	-0.16	5.96e-05	0.1936	0.268796	FALSE	TRUE	FALSE	ieu-b-4874	2	113838725	0.000152766	373295	0.7	bladder cancer	TRUE	NA	NA	NA	NA	NA	NA	NA	5.49e-07	2	113838725	3427	0.03188	TRUE	2	1	TRUE
CM CD8br %CD8br	rs62037700	T	G	T	G	-0.1237	-0.000228123	0.3115	0.097874	FALSE	FALSE	FALSE	ieu-b-4874	16	12102157	0.000227508	373295	0.32	bladder cancer	TRUE	NA	NA	NA	NA	NA	NA	NA	4.76e-06	16	12102157	3427	0.02699	TRUE	2	1	TRUE
CM CD8br %CD8br	rs62047982	T	C	T	C	-0.1224	-0.000192429	0.4721	0.273169	FALSE	FALSE	FALSE	ieu-b-4874	16	53154832	0.000156344	373295	0.22	bladder cancer	TRUE	NA	NA	NA	NA	NA	NA	NA	8.98e-07	16	53154832	3427	0.02487	TRUE	2	1	TRUE
CM CD8br %CD8br	rs6558408	A	G	A	G	-0.1456	-0.000229026	0.8039	0.60882	FALSE	FALSE	FALSE	ieu-b-4874	8	145033734	0.000140004	373295	0.1	bladder cancer	TRUE	NA	NA	NA	NA	NA	NA	NA	4.07e-06	8	145033734	3427	0.03155	TRUE	2	1	TRUE
CM CD8br %CD8br	rs66550246	G	A	G	A	-0.1351	-0.000139298	0.2454	0.173799	FALSE	FALSE	FALSE	ieu-b-4874	3	159822228	0.00019134	373295	0.47	bladder cancer	TRUE	NA	NA	NA	NA	NA	NA	NA	4.67e-06	3	159822228	3427	0.02946	TRUE	2	1	TRUE
CM CD8br %CD8br	rs67145759	G	A	G	A	-0.1373	-4.29e-05	0.2305	0.182113	FALSE	FALSE	FALSE	ieu-b-4874	2	38902624	0.000175071	373295	0.81	bladder cancer	TRUE	NA	NA	NA	NA	NA	NA	NA	4.13e-06	2	38902624	3427	0.02976	TRUE	2	1	TRUE
CM CD8br %CD8br	rs74559159	A	G	A	G	-0.3646	0.000164786	0.0274	0.022013	FALSE	FALSE	FALSE	ieu-b-4874	1	3835304	0.000461933	373295	0.719999	bladder cancer	TRUE	NA	NA	NA	NA	NA	NA	NA	1.92e-06	1	3835304	3427	0.07643	TRUE	2	1	TRUE
CM CD8br %CD8br	rs75518360	T	C	T	C	0.4829	-4.48e-06	0.0177	0.015359	FALSE	FALSE	FALSE	ieu-b-4874	1	14881805	0.00055013	373295	0.99	bladder cancer	TRUE	NA	NA	NA	NA	NA	NA	NA	3.18e-07	1	14881805	3427	0.09427	TRUE	2	1	TRUE
CM CD8br %CD8br	rs78719136	G	A	G	A	-0.3411	0.000339925	0.0279	0.015922	FALSE	FALSE	FALSE	ieu-b-4874	14	21355951	0.000547919	373295	0.53	bladder cancer	TRUE	NA	NA	NA	NA	NA	NA	NA	6.79e-06	14	21355951	3427	0.07568	TRUE	2	1	TRUE
CM CD8br %CD8br	rs78845536	G	T	G	T	0.3273	0.000438612	0.0321	0.031564	FALSE	FALSE	FALSE	ieu-b-4874	9	10866626	0.000388899	373295	0.26	bladder cancer	TRUE	NA	NA	NA	NA	NA	NA	NA	4.27e-06	9	10866626	3427	0.07107	TRUE	2	1	TRUE
CD64 on CD14- CD16+ monocyte	rs10036919	A	G	A	G	-0.129	1.37e-05	0.3392	0.304808	FALSE	FALSE	FALSE	ieu-b-4874	5	160219464	0.000147861	373295	0.93	bladder cancer	TRUE	NA	NA	NA	NA	NA	NA	NA	1.28e-06	5	160219464	3614	0.02659	TRUE	2	1	TRUE
CD64 on CD14- CD16+ monocyte	rs11065979	T	C	T	C	0.1181	0.000340875	0.4691	0.439629	FALSE	FALSE	FALSE	ieu-b-4874	12	112059557	0.000136405	373295	0.012	bladder cancer	TRUE	NA	NA	NA	NA	NA	NA	NA	4.43e-06	12	112059557	3614	0.0257	TRUE	2	1	TRUE
CD64 on CD14- CD16+ monocyte	rs111279951	A	C	A	C	0.3	0.000662425	0.0418	0.044239	FALSE	FALSE	FALSE	ieu-b-4874	5	18068020	0.000334159	373295	0.0470002	bladder cancer	TRUE	NA	NA	NA	NA	NA	NA	NA	2.32e-06	5	18068020	3614	0.06342	TRUE	2	1	TRUE
CD64 on CD14- CD16+ monocyte	rs1138358	C	A	C	A	0.142	0.000252099	0.2286	0.263368	FALSE	FALSE	FALSE	ieu-b-4874	15	80263345	0.000153415	373295	0.1	bladder cancer	TRUE	NA	NA	NA	NA	NA	NA	NA	1.76e-06	15	80263345	3614	0.02965	TRUE	2	1	TRUE
CD64 on CD14- CD16+ monocyte	rs115383270	A	G	A	G	0.2927	-0.000220678	0.1699	0.074412	FALSE	FALSE	FALSE	ieu-b-4874	1	161531340	0.000261764	373295	0.4	bladder cancer	TRUE	NA	NA	NA	NA	NA	NA	NA	1.81e-18	1	161531340	3614	0.0332	TRUE	2	1	TRUE
CD64 on CD14- CD16+ monocyte	rs117283705	A	G	A	G	0.5584	0.00112183	0.0104	0.011861	FALSE	FALSE	FALSE	ieu-b-4874	6	102881264	0.00064698	373295	0.0830004	bladder cancer	TRUE	NA	NA	NA	NA	NA	NA	NA	5.96e-06	6	102881264	3614	0.1231	TRUE	2	1	TRUE
CD64 on CD14- CD16+ monocyte	rs117446496	G	A	G	A	-0.2712	0.000472642	0.043	0.060732	FALSE	FALSE	FALSE	ieu-b-4874	17	78773924	0.000283957	373295	0.0959997	bladder cancer	TRUE	NA	NA	NA	NA	NA	NA	NA	5.54e-06	17	78773924	3614	0.05961	TRUE	2	1	TRUE
CD64 on CD14- CD16+ monocyte	rs11772145	A	C	A	C	-0.1849	-0.000137137	0.1054	0.127581	FALSE	FALSE	FALSE	ieu-b-4874	7	67584032	0.000205006	373295	0.5	bladder cancer	TRUE	NA	NA	NA	NA	NA	NA	NA	4.78e-06	7	67584032	3614	0.04036	TRUE	2	1	TRUE
CD64 on CD14- CD16+ monocyte	rs13161932	G	A	G	A	-0.2119	-0.000238355	0.0742	0.208241	FALSE	FALSE	FALSE	ieu-b-4874	5	42196750	0.000166438	373295	0.15	bladder cancer	TRUE	TRUE	rs13161932	rs66802170	G	A	C	T	8.56e-06	5	42074341	3614	0.04753	TRUE	2	1	TRUE
CD64 on CD14- CD16+ monocyte	rs1333255	A	G	A	G	-0.1577	0.000335382	0.1467	0.10463	FALSE	FALSE	FALSE	ieu-b-4874	13	94844743	0.000220892	373295	0.13	bladder cancer	TRUE	NA	NA	NA	NA	NA	NA	NA	7.93e-06	13	94844743	3614	0.03525	TRUE	2	1	TRUE
CD64 on CD14- CD16+ monocyte	rs150145799	C	T	C	T	0.2869	-0.000202078	0.1328	0.091025	FALSE	FALSE	FALSE	ieu-b-4874	1	149738590	0.000258693	373295	0.43	bladder cancer	TRUE	NA	NA	NA	NA	NA	NA	NA	2.36e-14	1	149738590	3614	0.03746	TRUE	2	1	TRUE
CD64 on CD14- CD16+ monocyte	rs150375532	A	G	A	G	1.124	6e-05	0.0026	0.010963	FALSE	FALSE	FALSE	ieu-b-4874	1	38146353	0.000673044	373295	0.93	bladder cancer	TRUE	NA	NA	NA	NA	NA	NA	NA	4.86e-06	1	38146353	3614	0.2456	TRUE	2	1	TRUE
CD64 on CD14- CD16+ monocyte	rs1932805	T	C	T	C	0.2052	0.000432468	0.8915	0.869369	FALSE	FALSE	FALSE	ieu-b-4874	13	82498699	0.00020063	373295	0.0309999	bladder cancer	TRUE	NA	NA	NA	NA	NA	NA	NA	2.49e-07	13	82498699	3614	0.0397	TRUE	2	1	TRUE
CD64 on CD14- CD16+ monocyte	rs2197098	C	T	C	T	-0.1495	-6.78e-06	0.7954	0.828956	FALSE	FALSE	FALSE	ieu-b-4874	2	154685822	0.000179614	373295	0.97	bladder cancer	TRUE	NA	NA	NA	NA	NA	NA	NA	1.15e-06	2	154685822	3614	0.0307	TRUE	2	1	TRUE
CD64 on CD14- CD16+ monocyte	rs35309480	G	T	G	T	0.156	-0.000193326	0.1663	0.056262	FALSE	FALSE	FALSE	ieu-b-4874	8	97002090	0.000336991	373295	0.57	bladder cancer	TRUE	NA	NA	NA	NA	NA	NA	NA	7.78e-06	8	97002090	3614	0.03485	TRUE	2	1	TRUE
CD64 on CD14- CD16+ monocyte	rs35944461	T	C	T	C	0.198	-2.57e-05	0.0952	0.231724	FALSE	FALSE	FALSE	ieu-b-4874	8	999862	0.000160399	373295	0.87	bladder cancer	TRUE	TRUE	rs35944461	rs28593383	T	C	A	G	3.98e-06	8	990572	3614	0.04286	TRUE	2	1	TRUE
CD64 on CD14- CD16+ monocyte	rs74970695	A	T	A	T	0.2212	-0.000100911	0.0844	0.050106	FALSE	TRUE	FALSE	ieu-b-4874	12	27651592	0.000325448	373295	0.760001	bladder cancer	TRUE	NA	NA	NA	NA	NA	NA	NA	1.2e-06	12	27651592	3614	0.04548	TRUE	2	1	TRUE
CD64 on CD14- CD16+ monocyte	rs9467953	T	C	T	C	-0.1206	8.38e-05	0.5491	0.324013	FALSE	FALSE	FALSE	ieu-b-4874	6	26965804	0.000144737	373295	0.56	bladder cancer	TRUE	NA	NA	NA	NA	NA	NA	NA	4.67e-06	6	26965804	3614	0.02631	TRUE	2	1	TRUE
CD64 on CD14- CD16+ monocyte	rs947853	T	C	T	C	0.1222	-8.49e-05	0.6187	0.517538	FALSE	FALSE	FALSE	ieu-b-4874	11	70567194	0.000136874	373295	0.54	bladder cancer	TRUE	NA	NA	NA	NA	NA	NA	NA	2.38e-06	11	70567194	3614	0.02586	TRUE	2	1	TRUE
CD33 on basophil	rs10040068	T	C	T	C	0.1888	3.57e-05	0.7453	0.722189	FALSE	FALSE	FALSE	ieu-b-4874	5	17802524	0.000151148	373295	0.81	bladder cancer	TRUE	TRUE	rs10040068	rs10064153	C	T	C	A	9.99e-06	5	17802169	1555	0.04261	TRUE	2	1	TRUE
CD33 on basophil	rs111695695	A	C	A	C	-0.5454	0.000506202	0.0772	0.027099	FALSE	FALSE	FALSE	ieu-b-4874	19	51897760	0.000475788	373295	0.29	bladder cancer	TRUE	NA	NA	NA	NA	NA	NA	NA	2.04e-15	19	51897760	1555	0.06799	TRUE	2	1	TRUE
CD33 on basophil	rs114475810	A	G	A	G	-2.111	-0.000522472	0.0013	0.022209	FALSE	FALSE	FALSE	ieu-b-4874	19	36056431	0.000459	373295	0.26	bladder cancer	TRUE	NA	NA	NA	NA	NA	NA	NA	6.35e-06	19	36056431	1555	0.4661	TRUE	2	1	TRUE
CD33 on basophil	rs117140964	T	C	T	C	0.4057	3.62e-05	0.0444	0.041001	FALSE	FALSE	FALSE	ieu-b-4874	10	101688758	0.000351331	373295	0.92	bladder cancer	TRUE	TRUE	rs117140964	rs4298837	T	C	A	G	4.77e-06	10	101609403	1555	0.08837	TRUE	2	1	TRUE
CD33 on basophil	rs1836704	C	A	C	A	-0.1775	0.000113669	0.3029	0.314925	FALSE	FALSE	FALSE	ieu-b-4874	4	30413400	0.000146615	373295	0.44	bladder cancer	TRUE	NA	NA	NA	NA	NA	NA	NA	9.17e-06	4	30413400	1555	0.03988	TRUE	2	1	TRUE
CD33 on basophil	rs4567661	C	A	C	A	-0.1841	0.000182501	0.318	0.348857	FALSE	FALSE	FALSE	ieu-b-4874	15	38786114	0.000142263	373295	0.2	bladder cancer	TRUE	NA	NA	NA	NA	NA	NA	NA	3.8e-06	15	38786114	1555	0.03969	TRUE	2	1	TRUE
CD33 on basophil	rs462331	T	A	T	A	-0.2264	-1.86e-05	0.1588	0.180808	FALSE	TRUE	FALSE	ieu-b-4874	16	83832299	0.000177098	373295	0.92	bladder cancer	TRUE	NA	NA	NA	NA	NA	NA	NA	9.75e-06	16	83832299	1555	0.05102	TRUE	2	1	TRUE
CD33 on basophil	rs56043070	A	G	A	G	0.4881	-0.0001301	0.0566	0.071595	FALSE	FALSE	FALSE	ieu-b-4874	1	247719769	0.000262182	373295	0.62	bladder cancer	TRUE	NA	NA	NA	NA	NA	NA	NA	6.3e-10	1	247719769	1555	0.07845	TRUE	2	1	TRUE
CD33 on basophil	rs57883729	A	C	A	C	-0.6872	-4.62e-05	0.0135	0.036136	FALSE	FALSE	FALSE	ieu-b-4874	2	162100169	0.000362058	373295	0.9	bladder cancer	TRUE	NA	NA	NA	NA	NA	NA	NA	5.37e-06	2	162100169	1555	0.1505	TRUE	2	1	TRUE
CD33 on basophil	rs58337014	A	C	A	C	-0.4142	0.000329263	0.0392	0.135304	FALSE	FALSE	FALSE	ieu-b-4874	10	53354043	0.000198674	373295	0.0969996	bladder cancer	TRUE	NA	NA	NA	NA	NA	NA	NA	8.39e-06	10	53354043	1555	0.09267	TRUE	2	1	TRUE
CD33 on basophil	rs58483275	T	C	T	C	0.5176	0.000317655	0.0733	0.011192	FALSE	FALSE	FALSE	ieu-b-4874	19	51868443	0.000667703	373295	0.630001	bladder cancer	TRUE	NA	NA	NA	NA	NA	NA	NA	1.33e-12	19	51868443	1555	0.07238	TRUE	2	1	TRUE
CD33 on basophil	rs6974483	A	T	A	T	0.1895	-6.01e-06	0.3154	0.279713	FALSE	TRUE	FALSE	ieu-b-4874	7	52705752	0.000150875	373295	0.97	bladder cancer	TRUE	NA	NA	NA	NA	NA	NA	NA	3.16e-06	7	52705752	1555	0.04051	TRUE	2	1	TRUE
CD33 on basophil	rs6979650	A	G	A	G	0.4393	-0.00062366	0.036	0.040109	FALSE	FALSE	FALSE	ieu-b-4874	7	36536896	0.000344324	373295	0.0700003	bladder cancer	TRUE	NA	NA	NA	NA	NA	NA	NA	8.16e-06	7	36536896	1555	0.09814	TRUE	2	1	TRUE
CD33 on basophil	rs7245846	A	G	A	G	-1.131	-0.000293284	0.1939	0.354169	FALSE	FALSE	FALSE	ieu-b-4874	19	51731176	0.000141996	373295	0.0389996	bladder cancer	TRUE	NA	NA	NA	NA	NA	NA	NA	1.81e-150	19	51731176	1555	0.03861	TRUE	2	1	TRUE
CD33 on basophil	rs72640540	A	G	A	G	-2.857	0.000480529	0.0006	0.062369	FALSE	FALSE	FALSE	ieu-b-4874	4	67038487	0.000287005	373295	0.0940005	bladder cancer	TRUE	NA	NA	NA	NA	NA	NA	NA	9.95e-06	4	67038487	1555	0.6446	TRUE	2	1	TRUE
CD33 on basophil	rs7351079	G	A	G	A	-0.3642	5.26e-05	0.2579	0.174167	FALSE	FALSE	FALSE	ieu-b-4874	19	51574038	0.000178302	373295	0.77	bladder cancer	TRUE	NA	NA	NA	NA	NA	NA	NA	1.4e-17	19	51574038	1555	0.04217	TRUE	2	1	TRUE
CD33 on basophil	rs75773078	A	G	A	G	-0.4918	-0.000116823	0.0707	0.0805	FALSE	FALSE	FALSE	ieu-b-4874	19	51742145	0.000254756	373295	0.649999	bladder cancer	TRUE	NA	NA	NA	NA	NA	NA	NA	4.53e-12	19	51742145	1555	0.07051	TRUE	2	1	TRUE
CD33 on basophil	rs77635331	T	C	T	C	-0.3018	0.000209635	0.0987	0.030105	FALSE	FALSE	FALSE	ieu-b-4874	16	8691661	0.00039521	373295	0.6	bladder cancer	TRUE	NA	NA	NA	NA	NA	NA	NA	7.83e-07	16	8691661	1555	0.06084	TRUE	2	1	TRUE
CD33 on basophil	rs79349965	C	G	C	G	0.3012	-8.77e-05	0.082	0.034854	FALSE	TRUE	FALSE	ieu-b-4874	1	248009263	0.000368759	373295	0.81	bladder cancer	TRUE	NA	NA	NA	NA	NA	NA	NA	7.18e-06	1	248009263	1555	0.06688	TRUE	2	1	TRUE
CD33 on basophil	rs79377141	A	G	A	G	0.3421	0.000186811	0.2006	0.099065	FALSE	FALSE	FALSE	ieu-b-4874	19	51538952	0.000240336	373295	0.44	bladder cancer	TRUE	NA	NA	NA	NA	NA	NA	NA	1.26e-13	19	51538952	1555	0.04576	TRUE	2	1	TRUE
CD33 on basophil	rs8069226	T	C	T	C	0.165	5.83e-05	0.5122	0.529119	FALSE	FALSE	FALSE	ieu-b-4874	17	8938562	0.000135542	373295	0.67	bladder cancer	TRUE	NA	NA	NA	NA	NA	NA	NA	6.97e-06	17	8938562	1555	0.03658	TRUE	2	1	TRUE
Lymphocyte AC	rs10040274	A	G	A	G	0.1212	0.000209987	0.2684	0.163112	FALSE	FALSE	FALSE	ieu-b-4874	5	114822737	0.000183799	373295	0.25	bladder cancer	TRUE	NA	NA	NA	NA	NA	NA	NA	8.6e-06	5	114822737	3653	0.02719	TRUE	2	1	TRUE
Lymphocyte AC	rs10410390	C	T	C	T	0.1125	0.000178221	0.5865	0.563728	FALSE	FALSE	FALSE	ieu-b-4874	19	54603419	0.00013745	373295	0.19	bladder cancer	TRUE	NA	NA	NA	NA	NA	NA	NA	7.13e-06	19	54603419	3653	0.02503	TRUE	2	1	TRUE
Lymphocyte AC	rs112839163	A	T	A	T	-0.5037	-0.000317095	0.0131	0.02602	FALSE	TRUE	FALSE	ieu-b-4874	20	14708666	0.000431702	373295	0.46	bladder cancer	TRUE	NA	NA	NA	NA	NA	NA	NA	7.7e-07	20	14708666	3653	0.1017	TRUE	2	1	TRUE
Lymphocyte AC	rs115885535	C	G	C	G	-0.8695	-0.000134586	0.0038	0.027522	FALSE	TRUE	FALSE	ieu-b-4874	4	99705681	0.000431843	373295	0.760001	bladder cancer	TRUE	NA	NA	NA	NA	NA	NA	NA	9.76e-06	4	99705681	3653	0.1963	TRUE	2	1	TRUE
Lymphocyte AC	rs11702153	T	C	T	C	0.1591	-0.000213985	0.4347	0.339308	FALSE	FALSE	FALSE	ieu-b-4874	21	14911701	0.000142269	373295	0.13	bladder cancer	TRUE	NA	NA	NA	NA	NA	NA	NA	5.76e-06	21	14911701	3653	0.03503	TRUE	2	1	TRUE
Lymphocyte AC	rs117336432	T	C	T	C	-1.537	-0.000319601	0.0011	0.01663	FALSE	FALSE	FALSE	ieu-b-4874	20	62523193	0.000553027	373295	0.56	bladder cancer	TRUE	NA	NA	NA	NA	NA	NA	NA	4.71e-06	20	62523193	3653	0.3352	TRUE	2	1	TRUE
Lymphocyte AC	rs11850806	G	T	G	T	-0.6792	-0.000276325	0.0083	0.019924	FALSE	FALSE	FALSE	ieu-b-4874	14	78669137	0.000483159	373295	0.57	bladder cancer	TRUE	NA	NA	NA	NA	NA	NA	NA	2.34e-07	14	78669137	3653	0.1311	TRUE	2	1	TRUE
Lymphocyte AC	rs12417637	G	A	G	A	0.1866	-0.000136034	0.1068	0.105753	FALSE	FALSE	FALSE	ieu-b-4874	11	128303735	0.000224174	373295	0.54	bladder cancer	TRUE	NA	NA	NA	NA	NA	NA	NA	3.85e-06	11	128303735	3653	0.04033	TRUE	2	1	TRUE
Lymphocyte AC	rs142551447	G	C	G	C	0.2811	-0.000604783	0.0387	0.021127	FALSE	TRUE	FALSE	ieu-b-4874	16	28203694	0.000476265	373295	0.2	bladder cancer	TRUE	NA	NA	NA	NA	NA	NA	NA	8.66e-06	16	28203694	3653	0.06311	TRUE	2	1	TRUE
Lymphocyte AC	rs17824379	G	A	G	A	-1.046	0.000826997	0.0027	0.014058	FALSE	FALSE	FALSE	ieu-b-4874	3	5810961	0.00061282	373295	0.18	bladder cancer	TRUE	NA	NA	NA	NA	NA	NA	NA	4.03e-06	3	5810961	3653	0.2266	TRUE	2	1	TRUE
Lymphocyte AC	rs2797531	A	G	A	G	0.1303	0.000307116	0.7446	0.824186	FALSE	FALSE	FALSE	ieu-b-4874	1	111173494	0.000178478	373295	0.0850002	bladder cancer	TRUE	NA	NA	NA	NA	NA	NA	NA	5.88e-06	1	111173494	3653	0.02871	TRUE	2	1	TRUE
Lymphocyte AC	rs55802874	G	A	G	A	0.1317	-0.000227107	0.2275	0.283209	FALSE	FALSE	FALSE	ieu-b-4874	7	55923072	0.000150783	373295	0.13	bladder cancer	TRUE	NA	NA	NA	NA	NA	NA	NA	8.15e-06	7	55923072	3653	0.02947	TRUE	2	1	TRUE
Lymphocyte AC	rs597808	G	A	G	A	-0.1543	-0.00031217	0.5363	0.51503	FALSE	FALSE	FALSE	ieu-b-4874	12	111973358	0.000135542	373295	0.021	bladder cancer	TRUE	NA	NA	NA	NA	NA	NA	NA	9.39e-09	12	111973358	3653	0.02682	TRUE	2	1	TRUE
Lymphocyte AC	rs6942586	A	G	A	G	-0.1163	-8.26e-05	0.6393	0.578564	FALSE	FALSE	FALSE	ieu-b-4874	7	36530276	0.00014092	373295	0.56	bladder cancer	TRUE	NA	NA	NA	NA	NA	NA	NA	5.96e-06	7	36530276	3653	0.02565	TRUE	2	1	TRUE
Lymphocyte AC	rs72960548	C	T	C	T	0.2319	7.82e-05	0.073	0.06484	FALSE	FALSE	FALSE	ieu-b-4874	6	127873865	0.000274268	373295	0.780001	bladder cancer	TRUE	NA	NA	NA	NA	NA	NA	NA	2.07e-06	6	127873865	3653	0.04877	TRUE	2	1	TRUE
Lymphocyte AC	rs7302662	C	T	C	T	-0.4219	0.000221772	0.017	0.017612	FALSE	FALSE	FALSE	ieu-b-4874	12	129172288	0.000513072	373295	0.67	bladder cancer	TRUE	NA	NA	NA	NA	NA	NA	NA	6.74e-06	12	129172288	3653	0.09359	TRUE	2	1	TRUE
Lymphocyte AC	rs79508330	T	C	T	C	-0.3326	-0.000500106	0.0281	0.019464	FALSE	FALSE	FALSE	ieu-b-4874	16	86445957	0.000491191	373295	0.31	bladder cancer	TRUE	NA	NA	NA	NA	NA	NA	NA	4.71e-06	16	86445957	3653	0.07255	TRUE	2	1	TRUE
Lymphocyte AC	rs9271629	A	C	A	C	0.1945	5.43e-05	0.7416	0.819925	FALSE	FALSE	FALSE	ieu-b-4874	6	32591976	0.000175977	373295	0.760001	bladder cancer	TRUE	NA	NA	NA	NA	NA	NA	NA	1.65e-08	6	32591976	3653	0.03437	TRUE	2	1	TRUE
Lymphocyte AC	rs941767	G	A	G	A	-0.1772	1.58e-05	0.8901	0.881749	FALSE	FALSE	FALSE	ieu-b-4874	14	91864872	0.000209761	373295	0.94	bladder cancer	TRUE	NA	NA	NA	NA	NA	NA	NA	6.11e-06	14	91864872	3653	0.03912	TRUE	2	1	TRUE
CD4+ AC	rs10040274	A	G	A	G	0.132	0.000209987	0.2685	0.163112	FALSE	FALSE	FALSE	ieu-b-4874	5	114822737	0.000183799	373295	0.25	bladder cancer	TRUE	NA	NA	NA	NA	NA	NA	NA	1.06e-06	5	114822737	3652	0.02702	TRUE	2	1	TRUE
CD4+ AC	rs10051472	C	G	C	G	0.1181	6.63e-05	0.3493	0.378193	FALSE	TRUE	FALSE	ieu-b-4874	5	79563530	0.000139845	373295	0.64	bladder cancer	TRUE	NA	NA	NA	NA	NA	NA	NA	5.39e-06	5	79563530	3652	0.02592	TRUE	2	1	TRUE
CD4+ AC	rs117563350	G	A	G	A	-0.324	0.00124014	0.0312	0.011534	FALSE	FALSE	FALSE	ieu-b-4874	6	151699396	0.000632498	373295	0.05	bladder cancer	TRUE	NA	NA	NA	NA	NA	NA	NA	3.12e-06	6	151699396	3652	0.06938	TRUE	2	1	TRUE
CD4+ AC	rs137903114	C	T	C	T	-0.9366	-0.000697543	0.004	0.024978	FALSE	FALSE	FALSE	ieu-b-4874	11	130770585	0.000435328	373295	0.11	bladder cancer	TRUE	NA	NA	NA	NA	NA	NA	NA	8.72e-07	11	130770585	3652	0.1901	TRUE	2	1	TRUE
CD4+ AC	rs1849876	C	T	C	T	0.1324	-0.000109	0.7529	0.731216	FALSE	FALSE	FALSE	ieu-b-4874	22	45615695	0.00015322	373295	0.48	bladder cancer	TRUE	TRUE	rs1849876	rs9614618	T	C	T	C	1.81e-06	22	45611053	3652	0.02769	TRUE	2	1	TRUE
CD4+ AC	rs28578320	C	T	C	T	0.1133	2.96e-05	0.3482	0.300968	FALSE	FALSE	FALSE	ieu-b-4874	15	96213772	0.000147589	373295	0.84	bladder cancer	TRUE	NA	NA	NA	NA	NA	NA	NA	9.78e-06	15	96213772	3652	0.02558	TRUE	2	1	TRUE
CD4+ AC	rs2972073	C	T	C	T	0.1612	-9.35e-05	0.8612	0.779022	FALSE	FALSE	FALSE	ieu-b-4874	2	55293730	0.000163529	373295	0.57	bladder cancer	TRUE	NA	NA	NA	NA	NA	NA	NA	7.86e-06	2	55293730	3652	0.03603	TRUE	2	1	TRUE
CD4+ AC	rs3129891	A	G	A	G	-0.1631	-1e-05	0.2249	0.209779	FALSE	FALSE	FALSE	ieu-b-4874	6	32415080	0.000165956	373295	0.95	bladder cancer	TRUE	NA	NA	NA	NA	NA	NA	NA	2.32e-06	6	32415080	3652	0.03448	TRUE	2	1	TRUE
CD4+ AC	rs3184504	C	T	C	T	-0.1838	-0.000302646	0.5305	0.516305	FALSE	FALSE	FALSE	ieu-b-4874	12	111884608	0.00013512	373295	0.025	bladder cancer	TRUE	NA	NA	NA	NA	NA	NA	NA	7.66e-12	12	111884608	3652	0.02676	TRUE	2	1	TRUE
CD4+ AC	rs3211602	A	G	A	G	-1.654	0.000346975	0.0012	0.014446	FALSE	FALSE	FALSE	ieu-b-4874	12	58147219	0.000565956	373295	0.54	bladder cancer	TRUE	NA	NA	NA	NA	NA	NA	NA	3.88e-06	12	58147219	3652	0.3577	TRUE	2	1	TRUE
CD4+ AC	rs414743	A	G	A	G	0.1352	5.78e-05	0.2367	0.283693	FALSE	FALSE	FALSE	ieu-b-4874	21	46512075	0.000150341	373295	0.7	bladder cancer	TRUE	NA	NA	NA	NA	NA	NA	NA	3.73e-06	21	46512075	3652	0.02918	TRUE	2	1	TRUE
CD4+ AC	rs4425753	G	C	G	C	0.1776	-6.74e-05	0.1247	0.118511	FALSE	TRUE	FALSE	ieu-b-4874	8	15369837	0.000210429	373295	0.75	bladder cancer	TRUE	NA	NA	NA	NA	NA	NA	NA	2.14e-06	8	15369837	3652	0.0374	TRUE	2	1	TRUE
CD4+ AC	rs61935579	A	G	A	G	-0.2776	0.000780008	0.0412	0.047604	FALSE	FALSE	FALSE	ieu-b-4874	12	60195749	0.000319813	373295	0.015	bladder cancer	TRUE	NA	NA	NA	NA	NA	NA	NA	4.88e-06	12	60195749	3652	0.06065	TRUE	2	1	TRUE
CD4+ AC	rs7162344	A	G	A	G	-0.1136	-0.000196254	0.4295	0.35065	FALSE	FALSE	FALSE	ieu-b-4874	15	26030485	0.000144643	373295	0.17	bladder cancer	TRUE	NA	NA	NA	NA	NA	NA	NA	3.37e-06	15	26030485	3652	0.02442	TRUE	2	1	TRUE
CD4+ AC	rs72960548	C	T	C	T	0.2456	7.82e-05	0.073	0.06484	FALSE	FALSE	FALSE	ieu-b-4874	6	127873865	0.000274268	373295	0.780001	bladder cancer	TRUE	NA	NA	NA	NA	NA	NA	NA	4.34e-07	6	127873865	3652	0.04852	TRUE	2	1	TRUE
CD4+ AC	rs73132830	A	G	A	G	0.1352	-0.000181378	0.2054	0.290431	FALSE	FALSE	FALSE	ieu-b-4874	7	55936249	0.000149324	373295	0.22	bladder cancer	TRUE	NA	NA	NA	NA	NA	NA	NA	7.94e-06	7	55936249	3652	0.03023	TRUE	2	1	TRUE
CD4+ AC	rs7537437	A	G	A	G	-0.1404	-0.000410248	0.1785	0.230701	FALSE	FALSE	FALSE	ieu-b-4874	1	39439538	0.000160439	373295	0.0109999	bladder cancer	TRUE	NA	NA	NA	NA	NA	NA	NA	9.07e-06	1	39439538	3652	0.03159	TRUE	2	1	TRUE
CD4+ AC	rs75494288	A	T	A	T	-0.3345	-0.000534017	0.0305	0.024713	FALSE	TRUE	FALSE	ieu-b-4874	2	59985834	0.000439734	373295	0.22	bladder cancer	TRUE	NA	NA	NA	NA	NA	NA	NA	6.4e-06	2	59985834	3652	0.07401	TRUE	2	1	TRUE
CD4+ AC	rs75697875	G	C	G	C	0.2783	-1.78e-05	0.0439	0.052675	FALSE	TRUE	FALSE	ieu-b-4874	1	23233895	0.000318261	373295	0.96	bladder cancer	TRUE	NA	NA	NA	NA	NA	NA	NA	3.81e-06	1	23233895	3652	0.06013	TRUE	2	1	TRUE
CD4+ AC	rs78628680	G	A	G	A	0.3565	-0.00126358	0.0245	0.011029	FALSE	FALSE	FALSE	ieu-b-4874	10	114300633	0.000647639	373295	0.051	bladder cancer	TRUE	NA	NA	NA	NA	NA	NA	NA	9.38e-06	10	114300633	3652	0.08034	TRUE	2	1	TRUE
CD4+ AC	rs905461	C	A	C	A	0.1209	9.72e-05	0.7223	0.713762	FALSE	FALSE	FALSE	ieu-b-4874	3	104884917	0.000150715	373295	0.52	bladder cancer	TRUE	NA	NA	NA	NA	NA	NA	NA	9.49e-06	3	104884917	3652	0.02726	TRUE	2	1	TRUE
CD4+ AC	rs9271772	A	G	A	G	0.1877	5.68e-05	0.774	0.819732	FALSE	FALSE	FALSE	ieu-b-4874	6	32594309	0.000175801	373295	0.75	bladder cancer	TRUE	TRUE	rs9271772	rs9271774	G	A	A	C	1.01e-07	6	32594275	3652	0.03517	TRUE	2	1	TRUE
CD3 on CD28- CD8br	rs10042722	C	G	C	G	-0.1264	0.000127621	0.3827	0.305934	FALSE	TRUE	FALSE	ieu-b-4874	5	67121250	0.000148183	373295	0.39	bladder cancer	TRUE	NA	NA	NA	NA	NA	NA	NA	7.1e-06	5	67121250	2919	0.02809	TRUE	2	1	TRUE
CD3 on CD28- CD8br	rs10280171	C	T	C	T	-0.5408	2.88e-05	0.013	0.079897	FALSE	FALSE	FALSE	ieu-b-4874	7	155971101	0.000254128	373295	0.91	bladder cancer	TRUE	NA	NA	NA	NA	NA	NA	NA	2.9e-06	7	155971101	2919	0.1154	TRUE	2	1	TRUE
CD3 on CD28- CD8br	rs10861453	G	A	G	A	-0.1298	-4.22e-05	0.4459	0.472954	FALSE	FALSE	FALSE	ieu-b-4874	12	105931980	0.000136991	373295	0.760001	bladder cancer	TRUE	NA	NA	NA	NA	NA	NA	NA	3.16e-06	12	105931980	2919	0.0278	TRUE	2	1	TRUE
CD3 on CD28- CD8br	rs12570957	A	C	A	C	0.1445	-2.66e-05	0.2681	0.409673	FALSE	FALSE	FALSE	ieu-b-4874	10	101981274	0.000137576	373295	0.85	bladder cancer	TRUE	NA	NA	NA	NA	NA	NA	NA	2.88e-06	10	101981274	2919	0.03082	TRUE	2	1	TRUE
CD3 on CD28- CD8br	rs141566851	A	G	A	G	-0.5188	-0.000217381	0.0149	0.011951	FALSE	FALSE	FALSE	ieu-b-4874	3	170163167	0.000628329	373295	0.73	bladder cancer	TRUE	NA	NA	NA	NA	NA	NA	NA	5.04e-06	3	170163167	2919	0.1135	TRUE	2	1	TRUE
CD3 on CD28- CD8br	rs143007860	T	A	T	A	0.2933	-0.000467295	0.0486	0.011065	FALSE	TRUE	FALSE	ieu-b-4874	7	13007100	0.00067546	373295	0.49	bladder cancer	TRUE	NA	NA	NA	NA	NA	NA	NA	5.91e-06	7	13007100	2919	0.06464	TRUE	2	1	TRUE
CD3 on CD28- CD8br	rs1542545	C	T	C	T	-0.1677	-0.000109891	0.8126	0.621767	FALSE	FALSE	FALSE	ieu-b-4874	4	189530591	0.000142303	373295	0.44	bladder cancer	TRUE	NA	NA	NA	NA	NA	NA	NA	2.91e-06	4	189530591	2919	0.03579	TRUE	2	1	TRUE
CD3 on CD28- CD8br	rs28620385	C	T	C	T	0.14	0.000136296	0.3114	0.281954	FALSE	FALSE	FALSE	ieu-b-4874	21	46488731	0.000150504	373295	0.37	bladder cancer	TRUE	NA	NA	NA	NA	NA	NA	NA	1.67e-06	21	46488731	2919	0.02917	TRUE	2	1	TRUE
CD3 on CD28- CD8br	rs2988279	A	G	A	G	0.2396	2.66e-05	0.4849	0.424905	FALSE	FALSE	FALSE	ieu-b-4874	1	167419839	0.000136565	373295	0.85	bladder cancer	TRUE	NA	NA	NA	NA	NA	NA	NA	1.75e-18	1	167419839	2919	0.02713	TRUE	2	1	TRUE
CD3 on CD28- CD8br	rs4689428	G	C	G	C	-0.186	0.00020048	0.2052	0.306569	FALSE	TRUE	FALSE	ieu-b-4874	4	6388191	0.00014935	373295	0.18	bladder cancer	TRUE	NA	NA	NA	NA	NA	NA	NA	4.21e-08	4	6388191	2919	0.03384	TRUE	2	1	TRUE
CD3 on CD28- CD8br	rs59837469	C	G	C	G	0.3624	-3.01e-05	0.0331	0.066228	FALSE	TRUE	FALSE	ieu-b-4874	5	169629818	0.000284713	373295	0.92	bladder cancer	TRUE	NA	NA	NA	NA	NA	NA	NA	2.41e-06	5	169629818	2919	0.0767	TRUE	2	1	TRUE
CD3 on CD28- CD8br	rs6120663	A	C	A	C	-0.1254	4.45e-06	0.4726	0.44002	FALSE	FALSE	FALSE	ieu-b-4874	20	33081906	0.00013626	373295	0.97	bladder cancer	TRUE	NA	NA	NA	NA	NA	NA	NA	4.68e-06	20	33081906	2919	0.02733	TRUE	2	1	TRUE
CD3 on CD28- CD8br	rs62293633	G	C	G	C	0.2552	3.69e-05	0.0558	0.074925	FALSE	TRUE	FALSE	ieu-b-4874	3	163557077	0.000258371	373295	0.89	bladder cancer	TRUE	NA	NA	NA	NA	NA	NA	NA	8.42e-06	3	163557077	2919	0.05718	TRUE	2	1	TRUE
CD3 on CD28- CD8br	rs62574602	C	T	C	T	-0.5914	-0.000538764	0.0104	0.021029	FALSE	FALSE	FALSE	ieu-b-4874	9	96839069	0.000482851	373295	0.26	bladder cancer	TRUE	NA	NA	NA	NA	NA	NA	NA	9.74e-06	9	96839069	2919	0.1335	TRUE	2	1	TRUE
CD3 on CD28- CD8br	rs6564225	C	A	C	A	-0.1551	-0.000338793	0.2062	0.191832	FALSE	FALSE	FALSE	ieu-b-4874	16	75229833	0.000172131	373295	0.0490004	bladder cancer	TRUE	NA	NA	NA	NA	NA	NA	NA	8.17e-06	16	75229833	2919	0.0347	TRUE	2	1	TRUE
CD3 on CD28- CD8br	rs72975607	A	G	A	G	0.2633	0.000296648	0.0572	0.05124	FALSE	FALSE	FALSE	ieu-b-4874	11	103167130	0.000306783	373295	0.33	bladder cancer	TRUE	NA	NA	NA	NA	NA	NA	NA	6.4e-06	11	103167130	2919	0.05824	TRUE	2	1	TRUE
CD3 on CD28- CD8br	rs7334537	C	G	C	G	-0.1418	0.000113433	0.2335	0.266267	FALSE	TRUE	FALSE	ieu-b-4874	13	76014918	0.000152865	373295	0.46	bladder cancer	TRUE	NA	NA	NA	NA	NA	NA	NA	9.76e-06	13	76014918	2919	0.03201	TRUE	2	1	TRUE
CD3 on CD28- CD8br	rs77294768	A	G	A	G	-0.188	1.18e-05	0.1264	0.090153	FALSE	FALSE	FALSE	ieu-b-4874	1	6861035	0.000237497	373295	0.96	bladder cancer	TRUE	NA	NA	NA	NA	NA	NA	NA	5.59e-06	1	6861035	2919	0.04133	TRUE	2	1	TRUE
CD3 on CD28- CD8br	rs947505	G	A	G	A	0.2201	0.000169969	0.9046	0.858058	FALSE	FALSE	FALSE	ieu-b-4874	1	173302097	0.000199842	373295	0.4	bladder cancer	TRUE	NA	NA	NA	NA	NA	NA	NA	3.55e-06	1	173302097	2919	0.04738	TRUE	2	1	TRUE
CD27 on CD20- CD38-	rs10042952	A	C	A	C	-0.1577	-1.26e-05	0.1366	0.091717	FALSE	FALSE	FALSE	ieu-b-4874	5	67196963	0.000234404	373295	0.96	bladder cancer	TRUE	NA	NA	NA	NA	NA	NA	NA	7.25e-06	5	67196963	3592	0.03509	TRUE	2	1	TRUE
CD27 on CD20- CD38-	rs10740344	T	C	T	C	-0.1301	-9.47e-05	0.7394	0.662053	FALSE	FALSE	FALSE	ieu-b-4874	10	72155840	0.000144371	373295	0.51	bladder cancer	TRUE	NA	NA	NA	NA	NA	NA	NA	1.53e-06	10	72155840	3592	0.02703	TRUE	2	1	TRUE
CD27 on CD20- CD38-	rs10763431	C	T	C	T	0.1126	0.000177612	0.6356	0.659541	FALSE	FALSE	FALSE	ieu-b-4874	10	58627762	0.000142684	373295	0.21	bladder cancer	TRUE	TRUE	rs10763431	rs10825915	T	C	A	G	7.08e-06	10	58623676	3592	0.02504	TRUE	2	1	TRUE
CD27 on CD20- CD38-	rs113532966	C	T	C	T	0.1937	-0.000168473	0.0846	0.06088	FALSE	FALSE	FALSE	ieu-b-4874	2	50627626	0.000283652	373295	0.55	bladder cancer	TRUE	NA	NA	NA	NA	NA	NA	NA	4.87e-06	2	50627626	3592	0.04232	TRUE	2	1	TRUE
CD27 on CD20- CD38-	rs115412883	G	A	G	A	0.6043	-8.11e-05	0.0088	0.014925	FALSE	FALSE	FALSE	ieu-b-4874	3	26147574	0.000559371	373295	0.88	bladder cancer	TRUE	NA	NA	NA	NA	NA	NA	NA	9.97e-06	3	26147574	3592	0.1366	TRUE	2	1	TRUE
CD27 on CD20- CD38-	rs139998	C	T	C	T	-0.121	0.000185964	0.2739	0.186658	FALSE	FALSE	FALSE	ieu-b-4874	22	36862501	0.00017531	373295	0.29	bladder cancer	TRUE	NA	NA	NA	NA	NA	NA	NA	5.4e-06	22	36862501	3592	0.02655	TRUE	2	1	TRUE
CD27 on CD20- CD38-	rs147680281	T	C	T	C	2.007	-0.00021599	0.0008	0.014546	FALSE	FALSE	FALSE	ieu-b-4874	5	127113029	0.000580455	373295	0.709999	bladder cancer	TRUE	NA	NA	NA	NA	NA	NA	NA	4.92e-06	5	127113029	3592	0.4386	TRUE	2	1	TRUE
CD27 on CD20- CD38-	rs1785249	T	C	T	C	-0.1234	0.000207133	0.38	0.38484	FALSE	FALSE	FALSE	ieu-b-4874	18	3362511	0.000141482	373295	0.14	bladder cancer	TRUE	NA	NA	NA	NA	NA	NA	NA	5.09e-07	18	3362511	3592	0.02452	TRUE	2	1	TRUE
CD27 on CD20- CD38-	rs2024568	C	T	C	T	-0.118	7.84e-05	0.636	0.754092	FALSE	FALSE	FALSE	ieu-b-4874	20	44732089	0.000157352	373295	0.62	bladder cancer	TRUE	NA	NA	NA	NA	NA	NA	NA	2.49e-06	20	44732089	3592	0.02501	TRUE	2	1	TRUE
CD27 on CD20- CD38-	rs4578504	G	C	G	C	-0.1364	-0.000109387	0.77	0.754755	FALSE	TRUE	FALSE	ieu-b-4874	13	27510490	0.000158695	373295	0.49	bladder cancer	TRUE	NA	NA	NA	NA	NA	NA	NA	2.61e-06	13	27510490	3592	0.02898	TRUE	2	1	TRUE
CD27 on CD20- CD38-	rs61566441	T	C	T	C	0.1244	-2.32e-05	0.2848	0.190216	FALSE	FALSE	FALSE	ieu-b-4874	3	155044125	0.000173566	373295	0.89	bladder cancer	TRUE	NA	NA	NA	NA	NA	NA	NA	3.95e-06	3	155044125	3592	0.02693	TRUE	2	1	TRUE
CD27 on CD20- CD38-	rs7007180	G	T	G	T	0.1322	-2.74e-06	0.7354	0.600764	FALSE	FALSE	FALSE	ieu-b-4874	8	6947793	0.000138738	373295	0.98	bladder cancer	TRUE	TRUE	rs7007180	rs2001662	T	G	T	C	4.61e-06	8	6947493	3592	0.0288	TRUE	2	1	TRUE
CD27 on CD20- CD38-	rs7114298	G	A	G	A	-0.1221	0.000162568	0.7206	0.648918	FALSE	FALSE	FALSE	ieu-b-4874	11	65582028	0.000141587	373295	0.25	bladder cancer	TRUE	NA	NA	NA	NA	NA	NA	NA	6.09e-06	11	65582028	3592	0.02695	TRUE	2	1	TRUE
CD27 on CD20- CD38-	rs74432706	T	C	T	C	0.3494	-0.000116986	0.0245	0.051423	FALSE	FALSE	FALSE	ieu-b-4874	2	197887417	0.000312792	373295	0.709999	bladder cancer	TRUE	NA	NA	NA	NA	NA	NA	NA	5.23e-06	2	197887417	3592	0.0766	TRUE	2	1	TRUE
CD27 on CD20- CD38-	rs74551235	A	G	A	G	-0.2031	-0.000129947	0.0899	0.100271	FALSE	FALSE	FALSE	ieu-b-4874	6	150575442	0.00022521	373295	0.56	bladder cancer	TRUE	NA	NA	NA	NA	NA	NA	NA	1.15e-06	6	150575442	3592	0.04168	TRUE	2	1	TRUE
CD27 on CD20- CD38-	rs8072367	C	T	C	T	-0.1944	0.000217602	0.0869	0.105784	FALSE	FALSE	FALSE	ieu-b-4874	17	75901729	0.000220175	373295	0.32	bladder cancer	TRUE	NA	NA	NA	NA	NA	NA	NA	5.06e-06	17	75901729	3592	0.04255	TRUE	2	1	TRUE
CD27 on CD20- CD38-	rs909973	G	A	G	A	0.4996	-0.000228401	0.0131	0.024339	FALSE	FALSE	FALSE	ieu-b-4874	1	40901979	0.000439829	373295	0.6	bladder cancer	TRUE	NA	NA	NA	NA	NA	NA	NA	2.8e-06	1	40901979	3592	0.1065	TRUE	2	1	TRUE
CD4 on CD39+ activated Treg	rs10044521	T	G	T	G	0.5764	-0.000372729	0.0118	0.030776	FALSE	FALSE	FALSE	ieu-b-4874	5	116035707	0.000406635	373295	0.36	bladder cancer	TRUE	NA	NA	NA	NA	NA	NA	NA	8.91e-06	5	116035707	2920	0.1295	TRUE	2	1	TRUE
CD4 on CD39+ activated Treg	rs10130428	G	A	G	A	-0.2431	5.04e-05	0.0651	0.164212	FALSE	FALSE	FALSE	ieu-b-4874	14	95659768	0.000182574	373295	0.780001	bladder cancer	TRUE	NA	NA	NA	NA	NA	NA	NA	9.32e-06	14	95659768	2920	0.05476	TRUE	2	1	TRUE
CD4 on CD39+ activated Treg	rs11200863	A	G	A	G	-0.1689	-0.000114661	0.1666	0.093389	FALSE	FALSE	FALSE	ieu-b-4874	10	85875791	0.000233449	373295	0.62	bladder cancer	TRUE	NA	NA	NA	NA	NA	NA	NA	4.62e-06	10	85875791	2920	0.03679	TRUE	2	1	TRUE
CD4 on CD39+ activated Treg	rs11615628	A	G	A	G	-0.2062	-0.000132803	0.2466	0.299905	FALSE	FALSE	FALSE	ieu-b-4874	12	6903631	0.000148166	373295	0.37	bladder cancer	TRUE	NA	NA	NA	NA	NA	NA	NA	5.49e-11	12	6903631	2920	0.03133	TRUE	2	1	TRUE
CD4 on CD39+ activated Treg	rs116421623	T	G	T	G	-0.6839	-0.000290745	0.0089	0.021252	FALSE	FALSE	FALSE	ieu-b-4874	8	119192827	0.000469203	373295	0.54	bladder cancer	TRUE	NA	NA	NA	NA	NA	NA	NA	2.89e-06	8	119192827	2920	0.1459	TRUE	2	1	TRUE
CD4 on CD39+ activated Treg	rs12404655	G	A	G	A	-0.1494	0.000129072	0.244	0.233301	FALSE	FALSE	FALSE	ieu-b-4874	1	20943195	0.000160539	373295	0.42	bladder cancer	TRUE	NA	NA	NA	NA	NA	NA	NA	2.5e-06	1	20943195	2920	0.03167	TRUE	2	1	TRUE
CD4 on CD39+ activated Treg	rs13127505	T	C	T	C	-0.2318	0.000196428	0.0717	0.117004	FALSE	FALSE	FALSE	ieu-b-4874	4	141880770	0.000216582	373295	0.36	bladder cancer	TRUE	NA	NA	NA	NA	NA	NA	NA	9.83e-06	4	141880770	2920	0.05235	TRUE	2	1	TRUE
CD4 on CD39+ activated Treg	rs1625485	C	A	C	A	0.1528	0.000289164	0.4955	0.430442	FALSE	FALSE	FALSE	ieu-b-4874	6	29894389	0.000140814	373295	0.04	bladder cancer	TRUE	NA	NA	NA	NA	NA	NA	NA	1.24e-06	6	29894389	2920	0.03146	TRUE	2	1	TRUE
CD4 on CD39+ activated Treg	rs183012056	C	G	C	G	0.237	-0.000113642	0.0733	0.010205	FALSE	TRUE	FALSE	ieu-b-4874	4	4711458	0.000703743	373295	0.87	bladder cancer	TRUE	NA	NA	NA	NA	NA	NA	NA	7.73e-06	4	4711458	2920	0.05289	TRUE	2	1	TRUE
CD4 on CD39+ activated Treg	rs189810664	T	C	T	C	2.32	-0.000494896	0.0007	0.017332	FALSE	FALSE	FALSE	ieu-b-4874	9	97001952	0.000521496	373295	0.34	bladder cancer	TRUE	NA	NA	NA	NA	NA	NA	NA	4.73e-06	9	97001952	2920	0.5059	TRUE	2	1	TRUE
CD4 on CD39+ activated Treg	rs221124	A	G	A	G	-0.214	2.4e-05	0.1046	0.043799	FALSE	FALSE	FALSE	ieu-b-4874	7	28969250	0.000331566	373295	0.94	bladder cancer	TRUE	NA	NA	NA	NA	NA	NA	NA	1.94e-06	7	28969250	2920	0.04487	TRUE	2	1	TRUE
CD4 on CD39+ activated Treg	rs2253487	A	G	A	G	0.2209	0.00023702	0.4719	0.405641	FALSE	FALSE	FALSE	ieu-b-4874	6	31249127	0.000137484	373295	0.0850002	bladder cancer	TRUE	NA	NA	NA	NA	NA	NA	NA	1.42e-13	6	31249127	2920	0.02974	TRUE	2	1	TRUE
CD4 on CD39+ activated Treg	rs3757517	C	T	C	T	0.1866	-0.000419819	0.1212	0.147539	FALSE	FALSE	FALSE	ieu-b-4874	7	8242803	0.000192899	373295	0.0299999	bladder cancer	TRUE	NA	NA	NA	NA	NA	NA	NA	9.2e-06	7	8242803	2920	0.042	TRUE	2	1	TRUE
CD4 on CD39+ activated Treg	rs4127403	A	G	A	G	-0.2529	-0.000420224	0.0616	0.051784	FALSE	FALSE	FALSE	ieu-b-4874	18	6988423	0.000305617	373295	0.17	bladder cancer	TRUE	NA	NA	NA	NA	NA	NA	NA	5.57e-06	18	6988423	2920	0.05558	TRUE	2	1	TRUE
CD4 on CD39+ activated Treg	rs61954768	G	T	G	T	0.2391	0.000234427	0.0846	0.063122	FALSE	FALSE	FALSE	ieu-b-4874	13	54907331	0.000290428	373295	0.42	bladder cancer	TRUE	NA	NA	NA	NA	NA	NA	NA	1.81e-06	13	54907331	2920	0.04999	TRUE	2	1	TRUE
CD4 on CD39+ activated Treg	rs67057217	A	G	A	G	0.4459	0.000196664	0.0187	0.039963	FALSE	FALSE	FALSE	ieu-b-4874	8	74255588	0.000345891	373295	0.57	bladder cancer	TRUE	NA	NA	NA	NA	NA	NA	NA	7.44e-06	8	74255588	2920	0.09934	TRUE	2	1	TRUE
CD4 on CD39+ activated Treg	rs71420675	A	G	A	G	0.3983	1.86e-05	0.0274	0.016567	FALSE	FALSE	FALSE	ieu-b-4874	2	196049654	0.000577807	373295	0.97	bladder cancer	TRUE	NA	NA	NA	NA	NA	NA	NA	9.34e-06	2	196049654	2920	0.08971	TRUE	2	1	TRUE
CD4 on CD39+ activated Treg	rs73084602	A	G	A	G	0.42	0.000282555	0.0236	0.12899	FALSE	FALSE	FALSE	ieu-b-4874	12	22956864	0.00021687	373295	0.19	bladder cancer	TRUE	NA	NA	NA	NA	NA	NA	NA	2.58e-06	12	22956864	2920	0.08915	TRUE	2	1	TRUE
CD4 on CD39+ activated Treg	rs73205076	T	C	T	C	-0.753	-0.000323892	0.0074	0.034752	FALSE	FALSE	FALSE	ieu-b-4874	3	126057162	0.000377029	373295	0.39	bladder cancer	TRUE	NA	NA	NA	NA	NA	NA	NA	6.36e-06	3	126057162	2920	0.1665	TRUE	2	1	TRUE
CD4 on CD39+ activated Treg	rs73457945	G	A	G	A	-0.5368	-0.000219977	0.0134	0.012325	FALSE	FALSE	FALSE	ieu-b-4874	11	21423886	0.00063568	373295	0.73	bladder cancer	TRUE	TRUE	rs73457945	rs73473032	G	A	G	A	6.72e-06	11	21414632	2920	0.119	TRUE	2	1	TRUE
CD4 on CD39+ activated Treg	rs9263475	G	A	G	A	0.2029	0.000146044	0.4865	0.201323	FALSE	FALSE	FALSE	ieu-b-4874	6	31050348	0.00016763	373295	0.38	bladder cancer	TRUE	NA	NA	NA	NA	NA	NA	NA	9.61e-12	6	31050348	2920	0.02967	TRUE	2	1	TRUE
CD4 on CD39+ secreting Treg	rs10044521	T	G	T	G	0.5917	-0.000372729	0.0118	0.030776	FALSE	FALSE	FALSE	ieu-b-4874	5	116035707	0.000406635	373295	0.36	bladder cancer	TRUE	NA	NA	NA	NA	NA	NA	NA	5.13e-06	5	116035707	2920	0.1295	TRUE	2	1	TRUE
CD4 on CD39+ secreting Treg	rs10819527	C	G	C	G	0.158	0.000199113	0.2104	0.218972	FALSE	TRUE	FALSE	ieu-b-4874	9	132242279	0.000163321	373295	0.22	bladder cancer	TRUE	NA	NA	NA	NA	NA	NA	NA	2.08e-06	9	132242279	2920	0.03323	TRUE	2	1	TRUE
CD4 on CD39+ secreting Treg	rs10882655	A	G	A	G	-0.2945	6.51e-05	0.5276	0.448089	FALSE	FALSE	FALSE	ieu-b-4874	10	97474371	0.000135876	373295	0.630001	bladder cancer	TRUE	NA	NA	NA	NA	NA	NA	NA	7.84e-28	10	97474371	2920	0.02665	TRUE	2	1	TRUE
CD4 on CD39+ secreting Treg	rs11584259	C	G	C	G	0.1692	0.000185349	0.1651	0.181134	FALSE	TRUE	FALSE	ieu-b-4874	1	22732386	0.000175369	373295	0.29	bladder cancer	TRUE	NA	NA	NA	NA	NA	NA	NA	3.87e-06	1	22732386	2920	0.03656	TRUE	2	1	TRUE
CD4 on CD39+ secreting Treg	rs115907820	C	T	C	T	0.5043	0.000167373	0.0166	0.017991	FALSE	FALSE	FALSE	ieu-b-4874	7	37068759	0.000508735	373295	0.74	bladder cancer	TRUE	NA	NA	NA	NA	NA	NA	NA	1.82e-06	7	37068759	2920	0.1054	TRUE	2	1	TRUE
CD4 on CD39+ secreting Treg	rs11610038	T	G	T	G	-0.5329	-0.000356832	0.0128	0.024772	FALSE	FALSE	FALSE	ieu-b-4874	12	4770669	0.00044094	373295	0.42	bladder cancer	TRUE	NA	NA	NA	NA	NA	NA	NA	6.74e-06	12	4770669	2920	0.1182	TRUE	2	1	TRUE
CD4 on CD39+ secreting Treg	rs117458836	A	G	A	G	0.5108	4.02e-05	0.0187	0.017667	FALSE	FALSE	FALSE	ieu-b-4874	10	96773382	0.000522934	373295	0.94	bladder cancer	TRUE	NA	NA	NA	NA	NA	NA	NA	1.02e-06	10	96773382	2920	0.1043	TRUE	2	1	TRUE
CD4 on CD39+ secreting Treg	rs12778618	C	T	C	T	0.3488	-6.98e-06	0.0457	0.017172	FALSE	FALSE	FALSE	ieu-b-4874	10	95633120	0.000548549	373295	0.99	bladder cancer	TRUE	NA	NA	NA	NA	NA	NA	NA	1.29e-07	10	95633120	2920	0.06589	TRUE	2	1	TRUE
CD4 on CD39+ secreting Treg	rs136883	T	C	T	C	0.1498	0.0002126	0.3598	0.364168	FALSE	FALSE	FALSE	ieu-b-4874	22	45040462	0.000141242	373295	0.13	bladder cancer	TRUE	NA	NA	NA	NA	NA	NA	NA	1.33e-07	22	45040462	2920	0.02832	TRUE	2	1	TRUE
CD4 on CD39+ secreting Treg	rs139059955	T	C	T	C	-2.03	0.000415751	0.0009	0.015358	FALSE	FALSE	FALSE	ieu-b-4874	13	53615745	0.000551924	373295	0.450001	bladder cancer	TRUE	NA	NA	NA	NA	NA	NA	NA	7.67e-06	13	53615745	2920	0.4529	TRUE	2	1	TRUE
CD4 on CD39+ secreting Treg	rs41266967	T	C	T	C	-0.7854	-3.95e-05	0.0063	0.01569	FALSE	FALSE	FALSE	ieu-b-4874	2	241529785	0.000543855	373295	0.94	bladder cancer	TRUE	NA	NA	NA	NA	NA	NA	NA	8.65e-06	2	241529785	2920	0.1762	TRUE	2	1	TRUE
CD4 on CD39+ secreting Treg	rs446663	C	A	C	A	-0.1511	-6.06e-05	0.801	0.866126	FALSE	FALSE	FALSE	ieu-b-4874	16	77670157	0.000199238	373295	0.760001	bladder cancer	TRUE	NA	NA	NA	NA	NA	NA	NA	8.47e-06	16	77670157	2920	0.03387	TRUE	2	1	TRUE
CD4 on CD39+ secreting Treg	rs62568944	A	G	A	G	0.1684	-9.15e-05	0.1825	0.158684	FALSE	FALSE	FALSE	ieu-b-4874	9	87813612	0.000185319	373295	0.62	bladder cancer	TRUE	NA	NA	NA	NA	NA	NA	NA	3.27e-06	9	87813612	2920	0.03612	TRUE	2	1	TRUE
CD4 on CD39+ secreting Treg	rs7072664	A	G	A	G	-0.1342	-8.14e-05	0.4548	0.42425	FALSE	FALSE	FALSE	ieu-b-4874	10	126759321	0.000138384	373295	0.56	bladder cancer	TRUE	NA	NA	NA	NA	NA	NA	NA	1.18e-06	10	126759321	2920	0.02756	TRUE	2	1	TRUE
CD4 on CD39+ secreting Treg	rs71644931	G	A	G	A	0.5165	-0.000266561	0.0144	0.048587	FALSE	FALSE	FALSE	ieu-b-4874	1	238537221	0.000316961	373295	0.4	bladder cancer	TRUE	NA	NA	NA	NA	NA	NA	NA	6.52e-06	1	238537221	2920	0.1143	TRUE	2	1	TRUE
CD4 on CD39+ secreting Treg	rs73053728	G	A	G	A	-0.1553	-9.12e-05	0.2414	0.304283	FALSE	FALSE	FALSE	ieu-b-4874	12	6896546	0.000147208	373295	0.54	bladder cancer	TRUE	NA	NA	NA	NA	NA	NA	NA	9.53e-07	12	6896546	2920	0.03161	TRUE	2	1	TRUE
CD4 on CD39+ secreting Treg	rs80014012	C	A	C	A	-0.2259	-1.08e-05	0.1051	0.074304	FALSE	FALSE	FALSE	ieu-b-4874	10	86318511	0.000261064	373295	0.97	bladder cancer	TRUE	NA	NA	NA	NA	NA	NA	NA	4.71e-07	10	86318511	2920	0.04474	TRUE	2	1	TRUE
CD4 on CD39+ secreting Treg	rs9263475	G	A	G	A	0.2076	0.000146044	0.4865	0.201323	FALSE	FALSE	FALSE	ieu-b-4874	6	31050348	0.00016763	373295	0.38	bladder cancer	TRUE	NA	NA	NA	NA	NA	NA	NA	1.11e-12	6	31050348	2920	0.02905	TRUE	2	1	TRUE
CD4 on CD39+ secreting Treg	rs9265953	G	A	G	A	-0.173	-0.000139841	0.4796	0.529301	FALSE	FALSE	FALSE	ieu-b-4874	6	31315312	0.000135835	373295	0.3	bladder cancer	TRUE	NA	NA	NA	NA	NA	NA	NA	2.73e-09	6	31315312	2920	0.029	TRUE	2	1	TRUE
CD4 on HLA DR+ CD4+	rs10047088	C	T	C	T	0.1915	0.000644564	0.8832	0.952345	FALSE	FALSE	FALSE	ieu-b-4874	1	228004140	0.000324106	373295	0.0470002	bladder cancer	TRUE	NA	NA	NA	NA	NA	NA	NA	3.38e-06	1	228004140	3060	0.04113	TRUE	2	1	TRUE
CD4 on HLA DR+ CD4+	rs10179730	A	G	A	G	0.1972	-1.14e-05	0.8972	0.871238	FALSE	FALSE	FALSE	ieu-b-4874	2	188410351	0.000201881	373295	0.95	bladder cancer	TRUE	NA	NA	NA	NA	NA	NA	NA	8.83e-06	2	188410351	3060	0.04429	TRUE	2	1	TRUE
CD4 on HLA DR+ CD4+	rs10517576	C	T	C	T	0.578	0.000189986	0.0109	0.030738	FALSE	FALSE	FALSE	ieu-b-4874	4	154561623	0.000405681	373295	0.64	bladder cancer	TRUE	NA	NA	NA	NA	NA	NA	NA	3.46e-06	4	154561623	3060	0.1243	TRUE	2	1	TRUE
CD4 on HLA DR+ CD4+	rs10518646	T	C	T	C	0.5055	-6.88e-05	0.0141	0.028626	FALSE	FALSE	FALSE	ieu-b-4874	1	81127816	0.000406791	373295	0.87	bladder cancer	TRUE	NA	NA	NA	NA	NA	NA	NA	8.82e-06	1	81127816	3060	0.1135	TRUE	2	1	TRUE
CD4 on HLA DR+ CD4+	rs10946649	T	C	T	C	0.2637	0.000184861	0.0632	0.030531	FALSE	FALSE	FALSE	ieu-b-4874	6	23957018	0.000396692	373295	0.64	bladder cancer	TRUE	NA	NA	NA	NA	NA	NA	NA	1.79e-06	6	23957018	3060	0.0551	TRUE	2	1	TRUE
CD4 on HLA DR+ CD4+	rs11614716	G	T	G	T	-0.1537	-0.000123865	0.2485	0.301204	FALSE	FALSE	FALSE	ieu-b-4874	12	6904146	0.000148037	373295	0.4	bladder cancer	TRUE	NA	NA	NA	NA	NA	NA	NA	6.83e-07	12	6904146	3060	0.03089	TRUE	2	1	TRUE
CD4 on HLA DR+ CD4+	rs11929631	A	T	A	T	-0.2687	3.62e-05	0.0525	0.133913	FALSE	TRUE	FALSE	ieu-b-4874	3	164980538	0.000202169	373295	0.86	bladder cancer	TRUE	NA	NA	NA	NA	NA	NA	NA	5.92e-06	3	164980538	3060	0.05922	TRUE	2	1	TRUE
CD4 on HLA DR+ CD4+	rs12684941	G	A	G	A	-0.1207	0.000186039	0.4683	0.405157	FALSE	FALSE	FALSE	ieu-b-4874	9	37654930	0.000137915	373295	0.18	bladder cancer	TRUE	NA	NA	NA	NA	NA	NA	NA	6.04e-06	9	37654930	3060	0.02664	TRUE	2	1	TRUE
CD4 on HLA DR+ CD4+	rs13316780	C	T	C	T	0.5642	-0.000274947	0.0119	0.02253	FALSE	FALSE	FALSE	ieu-b-4874	3	108851829	0.000456409	373295	0.55	bladder cancer	TRUE	NA	NA	NA	NA	NA	NA	NA	4.72e-06	3	108851829	3060	0.1231	TRUE	2	1	TRUE
CD4 on HLA DR+ CD4+	rs17002700	G	T	G	T	0.1481	4.81e-05	0.2028	0.162652	FALSE	FALSE	FALSE	ieu-b-4874	4	78417537	0.000183886	373295	0.79	bladder cancer	TRUE	NA	NA	NA	NA	NA	NA	NA	7.87e-06	4	78417537	3060	0.03309	TRUE	2	1	TRUE
CD4 on HLA DR+ CD4+	rs17088862	A	T	A	T	0.409	-1.22e-05	0.0224	0.042408	FALSE	TRUE	FALSE	ieu-b-4874	8	22843975	0.000339307	373295	0.97	bladder cancer	TRUE	TRUE	rs17088862	rs141992036	A	T	C	T	5.54e-06	8	22835142	3060	0.08986	TRUE	2	1	TRUE
CD4 on HLA DR+ CD4+	rs184989157	T	C	T	C	-0.3183	0.000486604	0.0364	0.016365	FALSE	FALSE	FALSE	ieu-b-4874	4	4214108	0.000556389	373295	0.38	bladder cancer	TRUE	NA	NA	NA	NA	NA	NA	NA	8.91e-06	4	4214108	3060	0.07154	TRUE	2	1	TRUE
CD4 on HLA DR+ CD4+	rs2524081	C	G	C	G	0.156	0.000153612	0.3253	0.148861	FALSE	TRUE	FALSE	ieu-b-4874	6	31250195	0.000189682	373295	0.42	bladder cancer	TRUE	TRUE	rs2524081	rs9264767	C	G	A	G	5.87e-07	6	31242083	3060	0.03115	TRUE	2	1	TRUE
CD4 on HLA DR+ CD4+	rs35032648	C	T	C	T	0.1191	0.000254094	0.5542	0.444753	FALSE	FALSE	FALSE	ieu-b-4874	5	3225418	0.000136679	373295	0.0629999	bladder cancer	TRUE	NA	NA	NA	NA	NA	NA	NA	7.44e-06	5	3225418	3060	0.02653	TRUE	2	1	TRUE
CD4 on HLA DR+ CD4+	rs35996890	T	A	T	A	0.124	-0.000113358	0.3467	0.36015	FALSE	TRUE	FALSE	ieu-b-4874	15	50184767	0.000140979	373295	0.42	bladder cancer	TRUE	TRUE	rs35996890	rs17487811	T	A	G	A	9.82e-06	15	50180635	3060	0.02799	TRUE	2	1	TRUE
CD4 on HLA DR+ CD4+	rs4371876	A	G	A	G	0.1831	1.49e-05	0.4923	0.346092	FALSE	FALSE	FALSE	ieu-b-4874	6	31067550	0.000143755	373295	0.92	bladder cancer	TRUE	NA	NA	NA	NA	NA	NA	NA	1.99e-10	6	31067550	3060	0.02869	TRUE	2	1	TRUE
CD4 on HLA DR+ CD4+	rs72822577	A	T	A	T	0.7293	0.00115489	0.0067	0.016276	FALSE	TRUE	FALSE	ieu-b-4874	10	97168100	0.000539495	373295	0.032	bladder cancer	TRUE	NA	NA	NA	NA	NA	NA	NA	7.7e-06	10	97168100	3060	0.1627	TRUE	2	1	TRUE
CD4 on HLA DR+ CD4+	rs75559970	T	G	T	G	0.5299	0.000973145	0.0167	0.026696	FALSE	FALSE	FALSE	ieu-b-4874	10	100518962	0.000419571	373295	0.02	bladder cancer	TRUE	NA	NA	NA	NA	NA	NA	NA	5.33e-07	10	100518962	3060	0.1055	TRUE	2	1	TRUE
CD4 on HLA DR+ CD4+	rs7819104	T	A	T	A	-0.1403	-8.72e-05	0.2402	0.207341	FALSE	TRUE	FALSE	ieu-b-4874	8	121748105	0.000167857	373295	0.6	bladder cancer	TRUE	NA	NA	NA	NA	NA	NA	NA	9.37e-06	8	121748105	3060	0.0316	TRUE	2	1	TRUE
CD4 on HLA DR+ CD4+	rs9357097	T	C	T	C	0.1669	3.47e-05	0.476	0.242716	FALSE	FALSE	FALSE	ieu-b-4874	6	30285121	0.0001578	373295	0.83	bladder cancer	TRUE	NA	NA	NA	NA	NA	NA	NA	2.57e-09	6	30285121	3060	0.02793	TRUE	2	1	TRUE
CD20 on unsw mem	rs10047347	T	C	T	C	0.117	5.6e-05	0.4197	0.343331	FALSE	FALSE	FALSE	ieu-b-4874	10	26741516	0.000142634	373295	0.69	bladder cancer	TRUE	NA	NA	NA	NA	NA	NA	NA	4.78e-06	10	26741516	3657	0.02555	TRUE	2	1	TRUE
CD20 on unsw mem	rs11205970	T	A	T	A	0.1723	0.000143742	0.1373	0.236	FALSE	TRUE	FALSE	ieu-b-4874	1	53046120	0.000159408	373295	0.37	bladder cancer	TRUE	TRUE	rs11205970	rs835348	T	A	C	T	5.08e-06	1	53008441	3657	0.03772	TRUE	2	1	TRUE
CD20 on unsw mem	rs112405902	A	G	A	G	0.2604	0.000625191	0.1069	0.027794	FALSE	FALSE	FALSE	ieu-b-4874	6	31809504	0.000410576	373295	0.13	bladder cancer	TRUE	NA	NA	NA	NA	NA	NA	NA	1.75e-08	6	31809504	3657	0.0461	TRUE	2	1	TRUE
CD20 on unsw mem	rs12554596	G	A	G	A	-0.1329	9.59e-05	0.3891	0.204155	FALSE	FALSE	FALSE	ieu-b-4874	9	37002142	0.00016778	373295	0.57	bladder cancer	TRUE	NA	NA	NA	NA	NA	NA	NA	1.92e-07	9	37002142	3657	0.02547	TRUE	2	1	TRUE
CD20 on unsw mem	rs13133046	G	A	G	A	-0.3755	0.000171531	0.0245	0.089628	FALSE	FALSE	FALSE	ieu-b-4874	4	23393356	0.000237295	373295	0.47	bladder cancer	TRUE	NA	NA	NA	NA	NA	NA	NA	1.38e-06	4	23393356	3657	0.07765	TRUE	2	1	TRUE
CD20 on unsw mem	rs147717587	T	C	T	C	-0.438	-0.00010991	0.0544	0.085094	FALSE	FALSE	FALSE	ieu-b-4874	6	32623828	0.000293051	373295	0.709999	bladder cancer	TRUE	NA	NA	NA	NA	NA	NA	NA	1.88e-06	6	32623828	3657	0.09174	TRUE	2	1	TRUE
CD20 on unsw mem	rs149214933	G	T	G	T	-0.7343	-0.000588337	0.0062	0.011061	FALSE	FALSE	FALSE	ieu-b-4874	13	64174465	0.000759377	373295	0.44	bladder cancer	TRUE	NA	NA	NA	NA	NA	NA	NA	7.75e-06	13	64174465	3657	0.164	TRUE	2	1	TRUE
CD20 on unsw mem	rs149695230	G	T	G	T	0.1869	0.000217574	0.1079	0.075108	FALSE	FALSE	FALSE	ieu-b-4874	11	60288804	0.000256743	373295	0.4	bladder cancer	TRUE	NA	NA	NA	NA	NA	NA	NA	3.31e-06	11	60288804	3657	0.04012	TRUE	2	1	TRUE
CD20 on unsw mem	rs182220218	G	A	G	A	-2.625	-6.9e-05	0.0005	0.011068	FALSE	FALSE	FALSE	ieu-b-4874	10	75422693	0.00066803	373295	0.92	bladder cancer	TRUE	NA	NA	NA	NA	NA	NA	NA	5.54e-06	10	75422693	3657	0.5769	TRUE	2	1	TRUE
CD20 on unsw mem	rs2114442	T	C	T	C	0.1119	-0.000133343	0.5751	0.423902	FALSE	FALSE	FALSE	ieu-b-4874	4	100832060	0.000136802	373295	0.33	bladder cancer	TRUE	NA	NA	NA	NA	NA	NA	NA	8.24e-06	4	100832060	3657	0.02506	TRUE	2	1	TRUE
CD20 on unsw mem	rs233495	T	C	T	C	-0.1166	6.87e-05	0.5585	0.523626	FALSE	FALSE	FALSE	ieu-b-4874	6	14806317	0.000135701	373295	0.61	bladder cancer	TRUE	NA	NA	NA	NA	NA	NA	NA	2.53e-06	6	14806317	3657	0.02474	TRUE	2	1	TRUE
CD20 on unsw mem	rs2523761	G	A	G	A	0.2051	2.78e-05	0.1628	0.20048	FALSE	FALSE	FALSE	ieu-b-4874	6	29818726	0.000169139	373295	0.87	bladder cancer	TRUE	NA	NA	NA	NA	NA	NA	NA	3.98e-07	6	29818726	3657	0.04038	TRUE	2	1	TRUE
CD20 on unsw mem	rs28572463	C	G	C	G	0.2569	1.62e-05	0.1081	0.016372	FALSE	TRUE	FALSE	ieu-b-4874	6	31209854	0.000532296	373295	0.98	bladder cancer	TRUE	NA	NA	NA	NA	NA	NA	NA	6.23e-08	6	31209854	3657	0.04736	TRUE	2	1	TRUE
CD20 on unsw mem	rs4447195	T	C	T	C	-0.2525	-0.000615555	0.0982	0.085057	FALSE	FALSE	FALSE	ieu-b-4874	11	60249734	0.000242325	373295	0.0109999	bladder cancer	TRUE	NA	NA	NA	NA	NA	NA	NA	1.45e-09	11	60249734	3657	0.04163	TRUE	2	1	TRUE
CD20 on unsw mem	rs62340965	A	T	A	T	-0.1451	0.000196977	0.2158	0.097514	FALSE	TRUE	FALSE	ieu-b-4874	4	190508875	0.000231784	373295	0.4	bladder cancer	TRUE	NA	NA	NA	NA	NA	NA	NA	3.64e-06	4	190508875	3657	0.03129	TRUE	2	1	TRUE
CD20 on unsw mem	rs6459417	T	C	T	C	0.2282	-4.26e-05	0.8737	0.909904	FALSE	FALSE	FALSE	ieu-b-4874	6	15858996	0.00023684	373295	0.86	bladder cancer	TRUE	NA	NA	NA	NA	NA	NA	NA	7.25e-10	6	15858996	3657	0.03694	TRUE	2	1	TRUE
CD20 on unsw mem	rs6509428	T	C	T	C	-0.2404	6.6e-05	0.2323	0.246242	FALSE	FALSE	FALSE	ieu-b-4874	19	49853881	0.000156915	373295	0.67	bladder cancer	TRUE	NA	NA	NA	NA	NA	NA	NA	2.09e-16	19	49853881	3657	0.02912	TRUE	2	1	TRUE
CD20 on unsw mem	rs75146873	C	G	C	G	0.1888	-0.00037062	0.0991	0.048549	FALSE	TRUE	FALSE	ieu-b-4874	19	50953211	0.000316346	373295	0.24	bladder cancer	TRUE	NA	NA	NA	NA	NA	NA	NA	6.83e-06	19	50953211	3657	0.04191	TRUE	2	1	TRUE
CD20 on unsw mem	rs77330263	T	C	T	C	0.538	1.93e-06	0.0113	0.01683	FALSE	FALSE	FALSE	ieu-b-4874	6	149134235	0.000545779	373295	1	bladder cancer	TRUE	NA	NA	NA	NA	NA	NA	NA	3.38e-06	6	149134235	3657	0.1156	TRUE	2	1	TRUE
CD20 on unsw mem	rs77612075	T	C	T	C	0.3517	0.00023571	0.0293	0.059432	FALSE	FALSE	FALSE	ieu-b-4874	5	162820460	0.000289636	373295	0.42	bladder cancer	TRUE	NA	NA	NA	NA	NA	NA	NA	9.46e-07	5	162820460	3657	0.07161	TRUE	2	1	TRUE
CD20 on unsw mem	rs78398983	A	G	A	G	1.716	8.14e-07	0.0011	0.016014	FALSE	FALSE	FALSE	ieu-b-4874	22	32864978	0.000565847	373295	1	bladder cancer	TRUE	NA	NA	NA	NA	NA	NA	NA	2.84e-06	22	32864978	3657	0.366	TRUE	2	1	TRUE
CD20 on unsw mem	rs9310657	G	T	G	T	0.1311	-0.000144213	0.7637	0.718033	FALSE	FALSE	FALSE	ieu-b-4874	3	21799836	0.000150164	373295	0.34	bladder cancer	TRUE	TRUE	rs9310657	rs4355302	T	G	G	A	4.58e-06	3	21797575	3657	0.02856	TRUE	2	1	TRUE
CD25 on IgD+ CD38br	rs10765088	A	G	A	G	-0.1198	-0.000244522	0.5103	0.327474	FALSE	FALSE	FALSE	ieu-b-4874	10	133336906	0.000144023	373295	0.0899995	bladder cancer	TRUE	NA	NA	NA	NA	NA	NA	NA	8.34e-07	10	133336906	3656	0.02428	TRUE	2	1	TRUE
CD25 on IgD+ CD38br	rs11616609	T	G	T	G	-0.1207	1.16e-05	0.3606	0.37172	FALSE	FALSE	FALSE	ieu-b-4874	13	35106024	0.00014035	373295	0.93	bladder cancer	TRUE	NA	NA	NA	NA	NA	NA	NA	2.1e-06	13	35106024	3656	0.02541	TRUE	2	1	TRUE
CD25 on IgD+ CD38br	rs12341626	C	T	C	T	-0.1597	-0.000260502	0.1539	0.245042	FALSE	FALSE	FALSE	ieu-b-4874	9	17383792	0.000163124	373295	0.11	bladder cancer	TRUE	NA	NA	NA	NA	NA	NA	NA	4.1e-06	9	17383792	3656	0.03463	TRUE	2	1	TRUE
CD25 on IgD+ CD38br	rs145198352	C	T	C	T	-0.4484	0.000623173	0.0159	0.019511	FALSE	FALSE	FALSE	ieu-b-4874	2	44009835	0.000490007	373295	0.2	bladder cancer	TRUE	NA	NA	NA	NA	NA	NA	NA	6.97e-06	2	44009835	3656	0.09962	TRUE	2	1	TRUE
CD25 on IgD+ CD38br	rs2566772	A	G	A	G	0.4644	2.31e-05	0.0148	0.036122	FALSE	FALSE	FALSE	ieu-b-4874	1	68704099	0.000362643	373295	0.95	bladder cancer	TRUE	NA	NA	NA	NA	NA	NA	NA	8.33e-06	1	68704099	3656	0.1041	TRUE	2	1	TRUE
CD25 on IgD+ CD38br	rs3793662	T	C	T	C	-0.1813	0.000110749	0.7758	0.813771	FALSE	FALSE	FALSE	ieu-b-4874	9	95886051	0.000173772	373295	0.52	bladder cancer	TRUE	NA	NA	NA	NA	NA	NA	NA	4.38e-10	9	95886051	3656	0.02898	TRUE	2	1	TRUE
CD25 on IgD+ CD38br	rs4129608	G	A	G	A	-0.1638	-0.000110912	0.1469	0.148076	FALSE	FALSE	FALSE	ieu-b-4874	9	18327215	0.000191234	373295	0.56	bladder cancer	TRUE	NA	NA	NA	NA	NA	NA	NA	2.27e-06	9	18327215	3656	0.03459	TRUE	2	1	TRUE
CD25 on IgD+ CD38br	rs4721574	A	G	A	G	0.1486	1.98e-05	0.2808	0.280972	FALSE	FALSE	FALSE	ieu-b-4874	7	2350451	0.000150775	373295	0.9	bladder cancer	TRUE	NA	NA	NA	NA	NA	NA	NA	6.7e-08	7	2350451	3656	0.02746	TRUE	2	1	TRUE
CD25 on IgD+ CD38br	rs6092493	G	A	G	A	-0.1116	0.000135764	0.5476	0.543162	FALSE	FALSE	FALSE	ieu-b-4874	20	56109595	0.000136509	373295	0.32	bladder cancer	TRUE	NA	NA	NA	NA	NA	NA	NA	6.69e-06	20	56109595	3656	0.02475	TRUE	2	1	TRUE
CD25 on IgD+ CD38br	rs62626323	A	C	A	C	0.349	-0.000397163	0.1074	0.05358	FALSE	FALSE	FALSE	ieu-b-4874	10	6115678	0.000301489	373295	0.19	bladder cancer	TRUE	NA	NA	NA	NA	NA	NA	NA	3.54e-18	10	6115678	3656	0.03994	TRUE	2	1	TRUE
CD25 on IgD+ CD38br	rs6550133	C	T	C	T	-0.1637	-0.00021943	0.1755	0.128331	FALSE	FALSE	FALSE	ieu-b-4874	3	32472280	0.000202146	373295	0.28	bladder cancer	TRUE	NA	NA	NA	NA	NA	NA	NA	2.74e-07	3	32472280	3656	0.0318	TRUE	2	1	TRUE
CD25 on IgD+ CD38br	rs709589	T	C	T	C	-0.2486	-0.000124178	0.4557	0.484123	FALSE	FALSE	FALSE	ieu-b-4874	14	106306841	0.000163475	373295	0.450001	bladder cancer	TRUE	NA	NA	NA	NA	NA	NA	NA	1.19e-15	14	106306841	3656	0.03091	TRUE	2	1	TRUE
CD25 on IgD+ CD38br	rs8044922	T	C	T	C	0.2506	-0.000112424	0.052	0.092513	FALSE	FALSE	FALSE	ieu-b-4874	16	928708	0.000245617	373295	0.649999	bladder cancer	TRUE	NA	NA	NA	NA	NA	NA	NA	7.56e-06	16	928708	3656	0.05588	TRUE	2	1	TRUE
CD25 on IgD+ CD38br	rs9596941	G	T	G	T	0.2115	0.000324759	0.0847	0.079295	FALSE	FALSE	FALSE	ieu-b-4874	13	54874198	0.000264971	373295	0.22	bladder cancer	TRUE	NA	NA	NA	NA	NA	NA	NA	2.59e-06	13	54874198	3656	0.04491	TRUE	2	1	TRUE
CD25 on transitional	rs11099673	G	A	G	A	0.115	8.75e-05	0.6442	0.719354	FALSE	FALSE	FALSE	ieu-b-4874	4	148899082	0.00015104	373295	0.56	bladder cancer	TRUE	NA	NA	NA	NA	NA	NA	NA	8.26e-06	4	148899082	3657	0.02576	TRUE	2	1	TRUE
CD25 on transitional	rs117473115	T	C	T	C	0.3516	0.000416089	0.0331	0.020513	FALSE	FALSE	FALSE	ieu-b-4874	10	54503355	0.00050233	373295	0.41	bladder cancer	TRUE	NA	NA	NA	NA	NA	NA	NA	5.03e-07	10	54503355	3657	0.06985	TRUE	2	1	TRUE
CD25 on transitional	rs12822478	A	C	A	C	-0.1156	5.27e-05	0.4841	0.424163	FALSE	FALSE	FALSE	ieu-b-4874	12	31514566	0.000139444	373295	0.709999	bladder cancer	TRUE	NA	NA	NA	NA	NA	NA	NA	4.2e-06	12	31514566	3657	0.02508	TRUE	2	1	TRUE
CD25 on transitional	rs140685335	G	A	G	A	0.3598	-0.000560941	0.0276	0.018562	FALSE	FALSE	FALSE	ieu-b-4874	18	1584719	0.000513647	373295	0.27	bladder cancer	TRUE	NA	NA	NA	NA	NA	NA	NA	1.92e-06	18	1584719	3657	0.07544	TRUE	2	1	TRUE
CD25 on transitional	rs144997167	T	C	T	C	1.298	-0.000234467	0.0019	0.013545	FALSE	FALSE	FALSE	ieu-b-4874	16	46608478	0.000597742	373295	0.69	bladder cancer	TRUE	NA	NA	NA	NA	NA	NA	NA	5.35e-06	16	46608478	3657	0.2849	TRUE	2	1	TRUE
CD25 on transitional	rs148702440	A	G	A	G	-0.3649	0.000176598	0.023	0.015024	FALSE	FALSE	FALSE	ieu-b-4874	13	22419220	0.000566689	373295	0.760001	bladder cancer	TRUE	NA	NA	NA	NA	NA	NA	NA	9.04e-06	13	22419220	3657	0.08209	TRUE	2	1	TRUE
CD25 on transitional	rs181825	A	G	A	G	0.3147	0.000398527	0.0321	0.066938	FALSE	FALSE	FALSE	ieu-b-4874	5	80131532	0.000271528	373295	0.14	bladder cancer	TRUE	NA	NA	NA	NA	NA	NA	NA	4.11e-06	5	80131532	3657	0.06823	TRUE	2	1	TRUE
CD25 on transitional	rs34513850	G	A	G	A	0.425	0.000800813	0.0179	0.013945	FALSE	FALSE	FALSE	ieu-b-4874	11	113437313	0.000576628	373295	0.16	bladder cancer	TRUE	NA	NA	NA	NA	NA	NA	NA	5.35e-06	11	113437313	3657	0.09326	TRUE	2	1	TRUE
CD25 on transitional	rs3793662	T	C	T	C	-0.1557	0.000110749	0.7759	0.813771	FALSE	FALSE	FALSE	ieu-b-4874	9	95886051	0.000173772	373295	0.52	bladder cancer	TRUE	NA	NA	NA	NA	NA	NA	NA	9.95e-08	9	95886051	3657	0.02917	TRUE	2	1	TRUE
CD25 on transitional	rs4129608	G	A	G	A	-0.1555	-0.000110912	0.1468	0.148076	FALSE	FALSE	FALSE	ieu-b-4874	9	18327215	0.000191234	373295	0.56	bladder cancer	TRUE	NA	NA	NA	NA	NA	NA	NA	8.18e-06	9	18327215	3657	0.03481	TRUE	2	1	TRUE
CD25 on transitional	rs4721574	A	G	A	G	0.1421	1.98e-05	0.2807	0.280972	FALSE	FALSE	FALSE	ieu-b-4874	7	2350451	0.000150775	373295	0.9	bladder cancer	TRUE	NA	NA	NA	NA	NA	NA	NA	2.84e-07	7	2350451	3657	0.02762	TRUE	2	1	TRUE
CD25 on transitional	rs474490	G	T	G	T	-0.1399	0.00021495	0.8033	0.760153	FALSE	FALSE	FALSE	ieu-b-4874	11	117287794	0.000159026	373295	0.18	bladder cancer	TRUE	NA	NA	NA	NA	NA	NA	NA	7.8e-06	11	117287794	3657	0.03126	TRUE	2	1	TRUE
CD25 on transitional	rs61945276	A	G	A	G	-0.3331	0.000688585	0.0313	0.03633	FALSE	FALSE	FALSE	ieu-b-4874	13	22645864	0.000364107	373295	0.0589997	bladder cancer	TRUE	NA	NA	NA	NA	NA	NA	NA	4.03e-06	13	22645864	3657	0.07215	TRUE	2	1	TRUE
CD25 on transitional	rs62626323	A	C	A	C	0.2969	-0.000397163	0.1075	0.05358	FALSE	FALSE	FALSE	ieu-b-4874	10	6115678	0.000301489	373295	0.19	bladder cancer	TRUE	NA	NA	NA	NA	NA	NA	NA	1.78e-13	10	6115678	3657	0.04016	TRUE	2	1	TRUE
CD25 on transitional	rs6550133	C	T	C	T	-0.1486	-0.00021943	0.1754	0.128331	FALSE	FALSE	FALSE	ieu-b-4874	3	32472280	0.000202146	373295	0.28	bladder cancer	TRUE	NA	NA	NA	NA	NA	NA	NA	3.5e-06	3	32472280	3657	0.03197	TRUE	2	1	TRUE
CD25 on transitional	rs709589	T	C	T	C	-0.2255	-0.000124178	0.4557	0.484123	FALSE	FALSE	FALSE	ieu-b-4874	14	106306841	0.000163475	373295	0.450001	bladder cancer	TRUE	NA	NA	NA	NA	NA	NA	NA	5.41e-13	14	106306841	3657	0.03114	TRUE	2	1	TRUE
CD25 on transitional	rs74709342	G	A	G	A	0.2699	0.000111689	0.0425	0.075039	FALSE	FALSE	FALSE	ieu-b-4874	13	107000655	0.000256415	373295	0.66	bladder cancer	TRUE	NA	NA	NA	NA	NA	NA	NA	8.58e-06	13	107000655	3657	0.06057	TRUE	2	1	TRUE
CD25 on transitional	rs76153918	T	C	T	C	0.8159	0.000537545	0.0042	0.034755	FALSE	FALSE	FALSE	ieu-b-4874	11	70398780	0.000375134	373295	0.15	bladder cancer	TRUE	NA	NA	NA	NA	NA	NA	NA	8.9e-06	11	70398780	3657	0.1834	TRUE	2	1	TRUE
CD25 on transitional	rs7899857	A	G	A	G	-0.1303	9.88e-05	0.3033	0.296187	FALSE	FALSE	FALSE	ieu-b-4874	10	133280976	0.000149293	373295	0.51	bladder cancer	TRUE	NA	NA	NA	NA	NA	NA	NA	1.7e-06	10	133280976	3657	0.02718	TRUE	2	1	TRUE
CD25 on transitional	rs876043	G	A	G	A	-0.1306	0.000289488	0.761	0.826124	FALSE	FALSE	FALSE	ieu-b-4874	14	92357145	0.000179644	373295	0.11	bladder cancer	TRUE	NA	NA	NA	NA	NA	NA	NA	6.86e-06	14	92357145	3657	0.029	TRUE	2	1	TRUE
T cell AC	rs10051472	C	G	C	G	0.116	6.63e-05	0.3492	0.378193	FALSE	TRUE	FALSE	ieu-b-4874	5	79563530	0.000139845	373295	0.64	bladder cancer	TRUE	NA	NA	NA	NA	NA	NA	NA	6.42e-06	5	79563530	3653	0.02567	TRUE	2	1	TRUE
T cell AC	rs11702153	T	C	T	C	0.1568	-0.000213985	0.4347	0.339308	FALSE	FALSE	FALSE	ieu-b-4874	21	14911701	0.000142269	373295	0.13	bladder cancer	TRUE	NA	NA	NA	NA	NA	NA	NA	5.55e-06	21	14911701	3653	0.03447	TRUE	2	1	TRUE
T cell AC	rs117391590	A	G	A	G	-0.2678	-0.000162264	0.0413	0.033502	FALSE	FALSE	FALSE	ieu-b-4874	17	42759948	0.000384272	373295	0.67	bladder cancer	TRUE	NA	NA	NA	NA	NA	NA	NA	9.4e-06	17	42759948	3653	0.06035	TRUE	2	1	TRUE
T cell AC	rs11850806	G	T	G	T	-0.6286	-0.000276325	0.0083	0.019924	FALSE	FALSE	FALSE	ieu-b-4874	14	78669137	0.000483159	373295	0.57	bladder cancer	TRUE	NA	NA	NA	NA	NA	NA	NA	1.17e-06	14	78669137	3653	0.1291	TRUE	2	1	TRUE
T cell AC	rs12124698	T	A	T	A	-0.6963	0.000285592	0.007	0.06022	FALSE	TRUE	FALSE	ieu-b-4874	1	246883687	0.00028546	373295	0.32	bladder cancer	TRUE	NA	NA	NA	NA	NA	NA	NA	8.78e-06	1	246883687	3653	0.1564	TRUE	2	1	TRUE
T cell AC	rs12599179	T	A	T	A	-0.3225	-0.000544195	0.0278	0.019758	FALSE	TRUE	FALSE	ieu-b-4874	16	86449253	0.000488338	373295	0.27	bladder cancer	TRUE	NA	NA	NA	NA	NA	NA	NA	7.32e-06	16	86449253	3653	0.07182	TRUE	2	1	TRUE
T cell AC	rs1550856	G	A	G	A	-0.1325	6.82e-05	0.7751	0.890262	FALSE	FALSE	FALSE	ieu-b-4874	8	117805397	0.000223853	373295	0.760001	bladder cancer	TRUE	NA	NA	NA	NA	NA	NA	NA	7.32e-06	8	117805397	3653	0.0295	TRUE	2	1	TRUE
T cell AC	rs17283318	T	C	T	C	-0.274	-0.000563383	0.0452	0.018854	FALSE	FALSE	FALSE	ieu-b-4874	3	151749774	0.000517893	373295	0.28	bladder cancer	TRUE	NA	NA	NA	NA	NA	NA	NA	4.59e-06	3	151749774	3653	0.0597	TRUE	2	1	TRUE
T cell AC	rs17339549	A	G	A	G	0.1161	-3.63e-05	0.3597	0.273194	FALSE	FALSE	FALSE	ieu-b-4874	2	80078045	0.000152308	373295	0.81	bladder cancer	TRUE	NA	NA	NA	NA	NA	NA	NA	4.12e-06	2	80078045	3653	0.02516	TRUE	2	1	TRUE
T cell AC	rs3184504	C	T	C	T	-0.1468	-0.000302646	0.5304	0.516305	FALSE	FALSE	FALSE	ieu-b-4874	12	111884608	0.00013512	373295	0.025	bladder cancer	TRUE	NA	NA	NA	NA	NA	NA	NA	2.65e-08	12	111884608	3653	0.02633	TRUE	2	1	TRUE
T cell AC	rs35669214	C	T	C	T	-0.1231	0.00013785	0.254	0.227057	FALSE	FALSE	FALSE	ieu-b-4874	17	71372662	0.000163423	373295	0.4	bladder cancer	TRUE	NA	NA	NA	NA	NA	NA	NA	8.31e-06	17	71372662	3653	0.02758	TRUE	2	1	TRUE
T cell AC	rs414743	A	G	A	G	0.1311	5.78e-05	0.2368	0.283693	FALSE	FALSE	FALSE	ieu-b-4874	21	46512075	0.000150341	373295	0.7	bladder cancer	TRUE	NA	NA	NA	NA	NA	NA	NA	5.74e-06	21	46512075	3653	0.02887	TRUE	2	1	TRUE
T cell AC	rs62447160	C	T	C	T	-0.1152	-0.000100874	0.6388	0.579962	FALSE	FALSE	FALSE	ieu-b-4874	7	36527098	0.000140529	373295	0.47	bladder cancer	TRUE	NA	NA	NA	NA	NA	NA	NA	5.12e-06	7	36527098	3653	0.02524	TRUE	2	1	TRUE
T cell AC	rs72960548	C	T	C	T	0.2563	7.82e-05	0.073	0.06484	FALSE	FALSE	FALSE	ieu-b-4874	6	127873865	0.000274268	373295	0.780001	bladder cancer	TRUE	NA	NA	NA	NA	NA	NA	NA	9.62e-08	6	127873865	3653	0.04796	TRUE	2	1	TRUE
T cell AC	rs75308045	G	A	G	A	-0.1332	-0.000308972	0.3063	0.265726	FALSE	FALSE	FALSE	ieu-b-4874	1	111150195	0.000154249	373295	0.0449997	bladder cancer	TRUE	NA	NA	NA	NA	NA	NA	NA	8.25e-07	1	111150195	3653	0.02697	TRUE	2	1	TRUE
T cell AC	rs75995320	A	G	A	G	-0.4299	-0.000683614	0.0171	0.01994	FALSE	FALSE	FALSE	ieu-b-4874	20	14839626	0.000493262	373295	0.17	bladder cancer	TRUE	NA	NA	NA	NA	NA	NA	NA	1.31e-06	20	14839626	3653	0.08871	TRUE	2	1	TRUE
T cell AC	rs76560336	T	C	T	C	-0.6975	-0.000639193	0.006	0.022359	FALSE	FALSE	FALSE	ieu-b-4874	4	33455497	0.000460515	373295	0.17	bladder cancer	TRUE	NA	NA	NA	NA	NA	NA	NA	7.33e-06	4	33455497	3653	0.1553	TRUE	2	1	TRUE
T cell AC	rs9271622	A	G	A	G	0.2154	5.43e-05	0.7473	0.819925	FALSE	FALSE	FALSE	ieu-b-4874	6	32591976	0.000175977	373295	0.760001	bladder cancer	TRUE	TRUE	rs9271622	rs9271629	G	A	C	A	2.14e-10	6	32591845	3653	0.03382	TRUE	2	1	TRUE
HLA DR+ CD4+ %T cell	rs10052603	G	A	G	A	-0.1031	0.000139603	0.5772	0.578627	FALSE	FALSE	FALSE	ieu-b-4874	5	10837029	0.00013909	373295	0.32	bladder cancer	TRUE	NA	NA	NA	NA	NA	NA	NA	3.39e-06	5	10837029	3595	0.02216	TRUE	2	1	TRUE
HLA DR+ CD4+ %T cell	rs11090233	A	G	A	G	-0.09863	-1.91e-05	0.611	0.52512	FALSE	FALSE	FALSE	ieu-b-4874	22	23690325	0.000135266	373295	0.89	bladder cancer	TRUE	NA	NA	NA	NA	NA	NA	NA	8.27e-06	22	23690325	3595	0.02209	TRUE	2	1	TRUE
HLA DR+ CD4+ %T cell	rs116253486	C	T	C	T	-1.176	-0.000903247	0.0015	0.018767	FALSE	FALSE	FALSE	ieu-b-4874	3	33925087	0.00049809	373295	0.0700003	bladder cancer	TRUE	NA	NA	NA	NA	NA	NA	NA	9.64e-06	3	33925087	3595	0.2655	TRUE	2	1	TRUE
HLA DR+ CD4+ %T cell	rs11641185	T	C	T	C	-0.2989	0.000201258	0.7744	0.732746	FALSE	FALSE	FALSE	ieu-b-4874	16	10986596	0.000153839	373295	0.19	bladder cancer	TRUE	NA	NA	NA	NA	NA	NA	NA	4.52e-32	16	10986596	3595	0.02511	TRUE	2	1	TRUE
HLA DR+ CD4+ %T cell	rs117110835	A	G	A	G	-0.7092	0.000192824	0.0047	0.041051	FALSE	FALSE	FALSE	ieu-b-4874	15	45945654	0.000345123	373295	0.58	bladder cancer	TRUE	NA	NA	NA	NA	NA	NA	NA	7.7e-06	15	45945654	3595	0.1583	TRUE	2	1	TRUE
HLA DR+ CD4+ %T cell	rs117868023	A	G	A	G	-0.4255	0.000922635	0.0134	0.010516	FALSE	FALSE	FALSE	ieu-b-4874	8	103550528	0.000662146	373295	0.16	bladder cancer	TRUE	NA	NA	NA	NA	NA	NA	NA	6.28e-06	8	103550528	3595	0.09406	TRUE	2	1	TRUE
HLA DR+ CD4+ %T cell	rs12609975	G	A	G	A	-0.1105	0.000143485	0.7039	0.607677	FALSE	FALSE	FALSE	ieu-b-4874	19	39400504	0.000138528	373295	0.3	bladder cancer	TRUE	NA	NA	NA	NA	NA	NA	NA	2.43e-06	19	39400504	3595	0.02341	TRUE	2	1	TRUE
HLA DR+ CD4+ %T cell	rs140410174	T	C	T	C	-0.209	0.000120959	0.0598	0.039069	FALSE	FALSE	FALSE	ieu-b-4874	19	1671156	0.000363713	373295	0.74	bladder cancer	TRUE	NA	NA	NA	NA	NA	NA	NA	5.69e-06	19	1671156	3595	0.04598	TRUE	2	1	TRUE
HLA DR+ CD4+ %T cell	rs146016042	A	G	A	G	-0.5232	-0.00104714	0.0086	0.011041	FALSE	FALSE	FALSE	ieu-b-4874	11	97693585	0.000659544	373295	0.11	bladder cancer	TRUE	NA	NA	NA	NA	NA	NA	NA	6.11e-06	11	97693585	3595	0.1155	TRUE	2	1	TRUE
HLA DR+ CD4+ %T cell	rs149004280	T	C	T	C	-0.5593	-0.00160894	0.0079	0.014183	FALSE	FALSE	FALSE	ieu-b-4874	22	48226137	0.000598692	373295	0.00719996	bladder cancer	TRUE	NA	NA	NA	NA	NA	NA	NA	2.68e-06	22	48226137	3595	0.119	TRUE	2	1	TRUE
HLA DR+ CD4+ %T cell	rs1832967	A	C	A	C	-0.1195	-0.000172805	0.2878	0.31266	FALSE	FALSE	FALSE	ieu-b-4874	6	66864922	0.00014631	373295	0.24	bladder cancer	TRUE	TRUE	rs1832967	rs6902436	A	C	T	C	3.26e-06	6	66862504	3595	0.02563	TRUE	2	1	TRUE
HLA DR+ CD4+ %T cell	rs3104415	C	A	C	A	0.1268	-8.34e-05	0.3819	0.337311	FALSE	FALSE	FALSE	ieu-b-4874	6	32582577	0.000143116	373295	0.56	bladder cancer	TRUE	NA	NA	NA	NA	NA	NA	NA	1.28e-06	6	32582577	3595	0.02613	TRUE	2	1	TRUE
HLA DR+ CD4+ %T cell	rs4867947	A	C	A	C	0.1895	-0.000156646	0.0691	0.177856	FALSE	FALSE	FALSE	ieu-b-4874	5	169629403	0.000179822	373295	0.38	bladder cancer	TRUE	NA	NA	NA	NA	NA	NA	NA	9.02e-06	5	169629403	3595	0.04263	TRUE	2	1	TRUE
HLA DR+ CD4+ %T cell	rs4906573	C	T	C	T	0.1137	0.000209663	0.2399	0.324613	FALSE	FALSE	FALSE	ieu-b-4874	14	45842287	0.000147738	373295	0.16	bladder cancer	TRUE	NA	NA	NA	NA	NA	NA	NA	9.34e-06	14	45842287	3595	0.02563	TRUE	2	1	TRUE
HLA DR+ CD4+ %T cell	rs6071096	C	T	C	T	-0.1051	0.000195437	0.6328	0.586399	FALSE	FALSE	FALSE	ieu-b-4874	20	58624500	0.000140971	373295	0.17	bladder cancer	TRUE	NA	NA	NA	NA	NA	NA	NA	2.49e-06	20	58624500	3595	0.02228	TRUE	2	1	TRUE
HLA DR+ CD4+ %T cell	rs7032773	T	C	T	C	-0.1199	0.00021088	0.4182	0.429166	FALSE	FALSE	FALSE	ieu-b-4874	9	117645562	0.000137142	373295	0.12	bladder cancer	TRUE	NA	NA	NA	NA	NA	NA	NA	1.55e-07	9	117645562	3595	0.02281	TRUE	2	1	TRUE
HLA DR+ CD4+ %T cell	rs7088079	A	G	A	G	-0.1728	0.000143475	0.0892	0.053233	FALSE	FALSE	FALSE	ieu-b-4874	10	3066899	0.000308351	373295	0.64	bladder cancer	TRUE	NA	NA	NA	NA	NA	NA	NA	4.14e-06	10	3066899	3595	0.03748	TRUE	2	1	TRUE
HLA DR+ CD4+ %T cell	rs7202106	T	C	T	C	0.1188	-9.31e-05	0.7811	0.744302	FALSE	FALSE	FALSE	ieu-b-4874	16	84375706	0.000155834	373295	0.55	bladder cancer	TRUE	NA	NA	NA	NA	NA	NA	NA	6.64e-06	16	84375706	3595	0.02634	TRUE	2	1	TRUE
HLA DR+ CD4+ %T cell	rs73062743	T	C	T	C	0.1528	-0.000433944	0.1122	0.059387	FALSE	FALSE	FALSE	ieu-b-4874	12	10511923	0.000295185	373295	0.14	bladder cancer	TRUE	NA	NA	NA	NA	NA	NA	NA	7.87e-06	12	10511923	3595	0.03413	TRUE	2	1	TRUE
HLA DR+ CD4+ %T cell	rs79563199	A	C	A	C	-0.1399	-0.000365358	0.1449	0.082343	FALSE	FALSE	FALSE	ieu-b-4874	9	130974142	0.000248021	373295	0.14	bladder cancer	TRUE	NA	NA	NA	NA	NA	NA	NA	4.52e-06	9	130974142	3595	0.03045	TRUE	2	1	TRUE
HLA DR+ CD4+ %T cell	rs7972178	T	G	T	G	0.1108	-6.44e-05	0.6476	0.769049	FALSE	FALSE	FALSE	ieu-b-4874	12	14354060	0.000160919	373295	0.69	bladder cancer	TRUE	NA	NA	NA	NA	NA	NA	NA	1.05e-06	12	14354060	3595	0.02265	TRUE	2	1	TRUE
HLA DR+ CD4+ %T cell	rs80226392	G	A	G	A	-0.1415	4.97e-05	0.1356	0.071972	FALSE	FALSE	FALSE	ieu-b-4874	3	8304753	0.000282337	373295	0.86	bladder cancer	TRUE	NA	NA	NA	NA	NA	NA	NA	5.86e-06	3	8304753	3595	0.03118	TRUE	2	1	TRUE
HLA DR+ CD4+ %T cell	rs8055544	T	G	T	G	0.1124	7.73e-05	0.6996	0.58681	FALSE	FALSE	FALSE	ieu-b-4874	16	11091561	0.000137215	373295	0.57	bladder cancer	TRUE	NA	NA	NA	NA	NA	NA	NA	6.26e-06	16	11091561	3595	0.02485	TRUE	2	1	TRUE
B cell AC	rs10052651	T	A	T	A	-0.1161	7.23e-05	0.6789	0.770568	FALSE	TRUE	FALSE	ieu-b-4874	5	18686084	0.00016095	373295	0.649999	bladder cancer	TRUE	NA	NA	NA	NA	NA	NA	NA	6.2e-06	5	18686084	3653	0.02565	TRUE	2	1	TRUE
B cell AC	rs1057686	G	A	G	A	-0.1735	-0.000138574	0.1291	0.163697	FALSE	FALSE	FALSE	ieu-b-4874	12	120533696	0.000184219	373295	0.450001	bladder cancer	TRUE	NA	NA	NA	NA	NA	NA	NA	1.96e-06	12	120533696	3653	0.0364	TRUE	2	1	TRUE
B cell AC	rs11627066	T	C	T	C	-0.1147	8.99e-05	0.4989	0.4706	FALSE	FALSE	FALSE	ieu-b-4874	14	66304049	0.000137252	373295	0.51	bladder cancer	TRUE	NA	NA	NA	NA	NA	NA	NA	2.81e-06	14	66304049	3653	0.02444	TRUE	2	1	TRUE
B cell AC	rs11666499	G	A	G	A	0.1913	-0.00022356	0.0884	0.194204	FALSE	FALSE	FALSE	ieu-b-4874	19	10372310	0.000172351	373295	0.19	bladder cancer	TRUE	NA	NA	NA	NA	NA	NA	NA	5.96e-06	19	10372310	3653	0.0422	TRUE	2	1	TRUE
B cell AC	rs117693242	G	A	G	A	-0.4542	-0.000526905	0.0159	0.016672	FALSE	FALSE	FALSE	ieu-b-4874	6	104445996	0.000527124	373295	0.32	bladder cancer	TRUE	NA	NA	NA	NA	NA	NA	NA	3.48e-06	6	104445996	3653	0.09774	TRUE	2	1	TRUE
B cell AC	rs12865434	G	A	G	A	0.1537	4.31e-05	0.4777	0.222458	FALSE	FALSE	FALSE	ieu-b-4874	13	108970631	0.000163174	373295	0.79	bladder cancer	TRUE	NA	NA	NA	NA	NA	NA	NA	1.83e-10	13	108970631	3653	0.02404	TRUE	2	1	TRUE
B cell AC	rs13173982	A	G	A	G	0.1243	0.000100123	0.2498	0.137872	FALSE	FALSE	FALSE	ieu-b-4874	5	149268532	0.000207274	373295	0.630001	bladder cancer	TRUE	NA	NA	NA	NA	NA	NA	NA	9.78e-06	5	149268532	3653	0.02807	TRUE	2	1	TRUE
B cell AC	rs142089808	G	A	G	A	-1.048	-0.000273221	0.0037	0.025188	FALSE	FALSE	FALSE	ieu-b-4874	11	116171120	0.00043626	373295	0.53	bladder cancer	TRUE	NA	NA	NA	NA	NA	NA	NA	7.04e-08	11	116171120	3653	0.1941	TRUE	2	1	TRUE
B cell AC	rs144825213	A	G	A	G	-1.553	-0.000297493	0.0015	0.021202	FALSE	FALSE	FALSE	ieu-b-4874	21	15364014	0.000522218	373295	0.57	bladder cancer	TRUE	NA	NA	NA	NA	NA	NA	NA	7.28e-06	21	15364014	3653	0.3457	TRUE	2	1	TRUE
B cell AC	rs17113368	T	C	T	C	0.1875	8.34e-05	0.0965	0.10068	FALSE	FALSE	FALSE	ieu-b-4874	1	95786229	0.000225715	373295	0.709999	bladder cancer	TRUE	NA	NA	NA	NA	NA	NA	NA	7.19e-06	1	95786229	3653	0.04172	TRUE	2	1	TRUE
B cell AC	rs1897558	C	A	C	A	-0.1305	-8.97e-06	0.2447	0.259996	FALSE	FALSE	FALSE	ieu-b-4874	5	167552605	0.00015431	373295	0.95	bladder cancer	TRUE	NA	NA	NA	NA	NA	NA	NA	3.3e-06	5	167552605	3653	0.02801	TRUE	2	1	TRUE
B cell AC	rs1966302	C	T	C	T	-0.1213	-5.89e-05	0.5591	0.518293	FALSE	FALSE	FALSE	ieu-b-4874	17	2718946	0.000136174	373295	0.67	bladder cancer	TRUE	NA	NA	NA	NA	NA	NA	NA	5.52e-07	17	2718946	3653	0.02419	TRUE	2	1	TRUE
B cell AC	rs2033489	T	C	T	C	0.1073	8.09e-05	0.5761	0.596412	FALSE	FALSE	FALSE	ieu-b-4874	19	56768215	0.000137885	373295	0.56	bladder cancer	TRUE	NA	NA	NA	NA	NA	NA	NA	9.17e-06	19	56768215	3653	0.02416	TRUE	2	1	TRUE
B cell AC	rs2395904	G	T	G	T	-0.1269	0.000132106	0.2658	0.273354	FALSE	FALSE	FALSE	ieu-b-4874	8	130617819	0.000152535	373295	0.39	bladder cancer	TRUE	NA	NA	NA	NA	NA	NA	NA	3.31e-06	8	130617819	3653	0.02725	TRUE	2	1	TRUE
B cell AC	rs35606919	G	T	G	T	0.1779	-0.000523728	0.1033	0.021143	FALSE	FALSE	FALSE	ieu-b-4874	17	4353359	0.000487892	373295	0.28	bladder cancer	TRUE	NA	NA	NA	NA	NA	NA	NA	6.02e-06	17	4353359	3653	0.03926	TRUE	2	1	TRUE
B cell AC	rs4933299	T	G	T	G	-0.1282	1.96e-05	0.2278	0.319478	FALSE	FALSE	FALSE	ieu-b-4874	10	85456128	0.000145539	373295	0.89	bladder cancer	TRUE	NA	NA	NA	NA	NA	NA	NA	8.17e-06	10	85456128	3653	0.02869	TRUE	2	1	TRUE
B cell AC	rs5009526	G	A	G	A	-0.1516	0.000202375	0.1495	0.141143	FALSE	FALSE	FALSE	ieu-b-4874	20	38895000	0.000193578	373295	0.3	bladder cancer	TRUE	NA	NA	NA	NA	NA	NA	NA	8.01e-06	20	38895000	3653	0.03391	TRUE	2	1	TRUE
B cell AC	rs5756641	A	G	A	G	-0.1362	-0.000322576	0.1993	0.199372	FALSE	FALSE	FALSE	ieu-b-4874	22	37746783	0.000174325	373295	0.064	bladder cancer	TRUE	NA	NA	NA	NA	NA	NA	NA	4.74e-06	22	37746783	3653	0.02972	TRUE	2	1	TRUE
B cell AC	rs58114937	G	A	G	A	0.1852	0.000347166	0.1313	0.058824	FALSE	FALSE	FALSE	ieu-b-4874	12	67638132	0.000291473	373295	0.23	bladder cancer	TRUE	NA	NA	NA	NA	NA	NA	NA	2.38e-07	12	67638132	3653	0.03578	TRUE	2	1	TRUE
B cell AC	rs62061834	C	T	C	T	0.2608	0.00014586	0.0511	0.054545	FALSE	FALSE	FALSE	ieu-b-4874	17	49836652	0.000298326	373295	0.62	bladder cancer	TRUE	NA	NA	NA	NA	NA	NA	NA	2.26e-06	17	49836652	3653	0.05507	TRUE	2	1	TRUE
B cell AC	rs6750281	G	A	G	A	0.1112	-6.62e-05	0.4294	0.406087	FALSE	FALSE	FALSE	ieu-b-4874	2	99274418	0.000137857	373295	0.630001	bladder cancer	TRUE	NA	NA	NA	NA	NA	NA	NA	8.12e-06	2	99274418	3653	0.02488	TRUE	2	1	TRUE
B cell AC	rs7210666	C	T	C	T	-0.129	-0.000172621	0.2253	0.299109	FALSE	FALSE	FALSE	ieu-b-4874	17	74980293	0.000147821	373295	0.24	bladder cancer	TRUE	NA	NA	NA	NA	NA	NA	NA	9.87e-06	17	74980293	3653	0.02915	TRUE	2	1	TRUE
B cell AC	rs72941136	C	G	C	G	0.1802	6.66e-05	0.1043	0.122862	FALSE	TRUE	FALSE	ieu-b-4874	1	82245693	0.000206003	373295	0.75	bladder cancer	TRUE	NA	NA	NA	NA	NA	NA	NA	5.99e-06	1	82245693	3653	0.03974	TRUE	2	1	TRUE
B cell AC	rs73520180	C	T	C	T	0.4493	0.000436085	0.0216	0.077701	FALSE	FALSE	FALSE	ieu-b-4874	9	118756021	0.00025283	373295	0.0850002	bladder cancer	TRUE	NA	NA	NA	NA	NA	NA	NA	1.21e-07	9	118756021	3653	0.08473	TRUE	2	1	TRUE
B cell AC	rs74390224	T	A	T	A	-0.5791	-0.000395112	0.0086	0.017608	FALSE	TRUE	FALSE	ieu-b-4874	18	65360311	0.000527063	373295	0.450001	bladder cancer	TRUE	NA	NA	NA	NA	NA	NA	NA	8.84e-06	18	65360311	3653	0.1301	TRUE	2	1	TRUE
B cell AC	rs7500855	T	C	T	C	-0.1258	-3.51e-05	0.5064	0.446235	FALSE	FALSE	FALSE	ieu-b-4874	16	87692231	0.000136223	373295	0.8	bladder cancer	TRUE	TRUE	rs7500855	rs55971692	T	C	A	G	2.51e-07	16	87692225	3653	0.02435	TRUE	2	1	TRUE
B cell AC	rs75270114	G	T	G	T	0.2916	9.67e-05	0.0371	0.014959	FALSE	FALSE	FALSE	ieu-b-4874	6	147667242	0.000565415	373295	0.86	bladder cancer	TRUE	NA	NA	NA	NA	NA	NA	NA	6.97e-06	6	147667242	3653	0.06479	TRUE	2	1	TRUE
B cell AC	rs7834992	G	A	G	A	0.1209	-2.79e-05	0.6731	0.767235	FALSE	FALSE	FALSE	ieu-b-4874	8	119556485	0.000159905	373295	0.86	bladder cancer	TRUE	NA	NA	NA	NA	NA	NA	NA	3.69e-06	8	119556485	3653	0.02608	TRUE	2	1	TRUE
B cell AC	rs9460146	C	T	C	T	0.144	3.86e-05	0.8277	0.816716	FALSE	FALSE	FALSE	ieu-b-4874	6	170725387	0.000174855	373295	0.83	bladder cancer	TRUE	TRUE	rs9460146	rs760500	T	C	T	C	7.22e-06	6	170723710	3653	0.03204	TRUE	2	1	TRUE
B cell AC	rs9883798	A	C	A	C	0.1124	6.19e-05	0.3603	0.306489	FALSE	FALSE	FALSE	ieu-b-4874	3	16473863	0.000150878	373295	0.68	bladder cancer	TRUE	NA	NA	NA	NA	NA	NA	NA	8.78e-06	3	16473863	3653	0.02525	TRUE	2	1	TRUE
CD28+ CD45RA+ CD8dim AC	rs1005513	C	T	C	T	0.12	-0.00037866	0.2531	0.313544	FALSE	FALSE	FALSE	ieu-b-4874	17	49196918	0.000145928	373295	0.00949992	bladder cancer	TRUE	NA	NA	NA	NA	NA	NA	NA	2.45e-06	17	49196918	3408	0.02541	TRUE	2	1	TRUE
CD28+ CD45RA+ CD8dim AC	rs10875036	C	T	C	T	-0.1218	0.000233949	0.2377	0.214434	FALSE	FALSE	FALSE	ieu-b-4874	1	97288628	0.000165195	373295	0.16	bladder cancer	TRUE	NA	NA	NA	NA	NA	NA	NA	2.74e-06	1	97288628	3408	0.02593	TRUE	2	1	TRUE
CD28+ CD45RA+ CD8dim AC	rs112637846	A	C	A	C	3.334	9.61e-05	0.0003	0.02527	FALSE	FALSE	FALSE	ieu-b-4874	6	149114553	0.000434556	373295	0.82	bladder cancer	TRUE	NA	NA	NA	NA	NA	NA	NA	2.76e-08	6	149114553	3408	0.5986	TRUE	2	1	TRUE
CD28+ CD45RA+ CD8dim AC	rs113098887	A	C	A	C	3.627	-0.000446739	0.0001	0.01654	FALSE	FALSE	FALSE	ieu-b-4874	6	84554072	0.000547171	373295	0.41	bladder cancer	TRUE	NA	NA	NA	NA	NA	NA	NA	4.38e-06	6	84554072	3408	0.7884	TRUE	2	1	TRUE
CD28+ CD45RA+ CD8dim AC	rs114437347	C	G	C	G	3.498	-0.000716156	0.0003	0.014241	FALSE	TRUE	FALSE	ieu-b-4874	4	86967620	0.000575095	373295	0.21	bladder cancer	TRUE	NA	NA	NA	NA	NA	NA	NA	2.3e-06	4	86967620	3408	0.739	TRUE	2	1	TRUE
CD28+ CD45RA+ CD8dim AC	rs11579717	A	G	A	G	1.176	0.000269345	0.0044	0.048262	FALSE	FALSE	FALSE	ieu-b-4874	1	199999121	0.000323136	373295	0.4	bladder cancer	TRUE	NA	NA	NA	NA	NA	NA	NA	1.77e-12	1	199999121	3408	0.1662	TRUE	2	1	TRUE
CD28+ CD45RA+ CD8dim AC	rs117403703	C	T	C	T	3.552	0.000350308	0.0001	0.013766	FALSE	FALSE	FALSE	ieu-b-4874	6	93203850	0.000584014	373295	0.55	bladder cancer	TRUE	NA	NA	NA	NA	NA	NA	NA	6.23e-06	6	93203850	3408	0.785	TRUE	2	1	TRUE
CD28+ CD45RA+ CD8dim AC	rs117513254	G	C	G	C	1.37	0.000140018	0.0018	0.014617	FALSE	TRUE	FALSE	ieu-b-4874	12	126913667	0.000562828	373295	0.8	bladder cancer	TRUE	NA	NA	NA	NA	NA	NA	NA	2.96e-06	12	126913667	3408	0.2927	TRUE	2	1	TRUE
CD28+ CD45RA+ CD8dim AC	rs117733745	A	T	A	T	4.225	-0.000245763	0.0003	0.024093	FALSE	TRUE	FALSE	ieu-b-4874	16	15158014	0.000458133	373295	0.59	bladder cancer	TRUE	NA	NA	NA	NA	NA	NA	NA	5.95e-06	16	15158014	3408	0.9315	TRUE	2	1	TRUE
CD28+ CD45RA+ CD8dim AC	rs12712610	G	A	G	A	0.1631	-0.0002459	0.2974	0.172858	FALSE	FALSE	FALSE	ieu-b-4874	2	38897249	0.000180096	373295	0.17	bladder cancer	TRUE	NA	NA	NA	NA	NA	NA	NA	2.82e-11	2	38897249	3408	0.02442	TRUE	2	1	TRUE
CD28+ CD45RA+ CD8dim AC	rs12907798	T	C	T	C	-0.1409	-0.000155241	0.1533	0.170213	FALSE	FALSE	FALSE	ieu-b-4874	15	36349479	0.00018089	373295	0.39	bladder cancer	TRUE	NA	NA	NA	NA	NA	NA	NA	3.79e-06	15	36349479	3408	0.03043	TRUE	2	1	TRUE
CD28+ CD45RA+ CD8dim AC	rs13243221	G	T	G	T	3.637	-0.000709622	0.0001	0.021497	FALSE	FALSE	FALSE	ieu-b-4874	7	80880540	0.000488184	373295	0.15	bladder cancer	TRUE	NA	NA	NA	NA	NA	NA	NA	3.68e-06	7	80880540	3408	0.7844	TRUE	2	1	TRUE
CD28+ CD45RA+ CD8dim AC	rs1341624	T	C	T	C	0.3324	7.23e-06	0.0255	0.058559	FALSE	FALSE	FALSE	ieu-b-4874	1	191433917	0.0002945	373295	0.98	bladder cancer	TRUE	NA	NA	NA	NA	NA	NA	NA	4.12e-06	1	191433917	3408	0.07207	TRUE	2	1	TRUE
CD28+ CD45RA+ CD8dim AC	rs138298107	T	C	T	C	0.9379	2.88e-05	0.0034	0.01483	FALSE	FALSE	FALSE	ieu-b-4874	1	213203523	0.000564378	373295	0.96	bladder cancer	TRUE	NA	NA	NA	NA	NA	NA	NA	3.24e-06	1	213203523	3408	0.2012	TRUE	2	1	TRUE
CD28+ CD45RA+ CD8dim AC	rs138960714	C	A	C	A	2.077	0.000737094	0.0006	0.010184	FALSE	FALSE	FALSE	ieu-b-4874	4	123422719	0.000683206	373295	0.28	bladder cancer	TRUE	NA	NA	NA	NA	NA	NA	NA	4.13e-06	4	123422719	3408	0.4504	TRUE	2	1	TRUE
CD28+ CD45RA+ CD8dim AC	rs141049772	C	T	C	T	2.128	0.000431047	0.0006	0.013192	FALSE	FALSE	FALSE	ieu-b-4874	14	52982783	0.000608487	373295	0.48	bladder cancer	TRUE	NA	NA	NA	NA	NA	NA	NA	9.73e-06	14	52982783	3408	0.4805	TRUE	2	1	TRUE
CD28+ CD45RA+ CD8dim AC	rs182236332	G	A	G	A	4.616	-4.78e-05	0.0001	0.010257	FALSE	FALSE	FALSE	ieu-b-4874	7	124954943	0.000706632	373295	0.95	bladder cancer	TRUE	NA	NA	NA	NA	NA	NA	NA	7.68e-06	7	124954943	3408	1.03	TRUE	2	1	TRUE
CD28+ CD45RA+ CD8dim AC	rs192475369	T	A	T	A	5.687	0.000631562	0.0001	0.020424	FALSE	TRUE	FALSE	ieu-b-4874	9	33552507	0.000507001	373295	0.21	bladder cancer	TRUE	NA	NA	NA	NA	NA	NA	NA	8.68e-06	9	33552507	3408	1.277	TRUE	2	1	TRUE
CD28+ CD45RA+ CD8dim AC	rs1948650	G	A	G	A	-0.1189	-6.92e-05	0.7676	0.679048	FALSE	FALSE	FALSE	ieu-b-4874	15	36040048	0.000152467	373295	0.649999	bladder cancer	TRUE	NA	NA	NA	NA	NA	NA	NA	4.43e-06	15	36040048	3408	0.02586	TRUE	2	1	TRUE
CD28+ CD45RA+ CD8dim AC	rs2185480	T	A	T	A	0.8456	-0.000242883	0.0051	0.174347	FALSE	TRUE	FALSE	ieu-b-4874	1	176239220	0.000178359	373295	0.17	bladder cancer	TRUE	TRUE	rs2185480	rs1503118	T	A	G	T	7.7e-07	1	176186935	3408	0.1708	TRUE	2	1	TRUE
CD28+ CD45RA+ CD8dim AC	rs35471013	T	C	T	C	-0.239	0.000320382	0.0502	0.069806	FALSE	FALSE	FALSE	ieu-b-4874	4	37794059	0.000275067	373295	0.24	bladder cancer	TRUE	NA	NA	NA	NA	NA	NA	NA	3.36e-06	4	37794059	3408	0.05133	TRUE	2	1	TRUE
CD28+ CD45RA+ CD8dim AC	rs35884179	A	G	A	G	-0.3532	0.000266571	0.0248	0.033149	FALSE	FALSE	FALSE	ieu-b-4874	2	26163168	0.000384533	373295	0.49	bladder cancer	TRUE	NA	NA	NA	NA	NA	NA	NA	8.58e-07	2	26163168	3408	0.07162	TRUE	2	1	TRUE
CD28+ CD45RA+ CD8dim AC	rs468979	C	T	C	T	0.1195	-0.000139837	0.755	0.612577	FALSE	FALSE	FALSE	ieu-b-4874	3	13489292	0.000139003	373295	0.31	bladder cancer	TRUE	NA	NA	NA	NA	NA	NA	NA	4.02e-06	3	13489292	3408	0.02587	TRUE	2	1	TRUE
CD28+ CD45RA+ CD8dim AC	rs541367304	A	G	A	G	2.141	4.45e-05	0.0032	0.020182	FALSE	FALSE	FALSE	ieu-b-4874	1	198283058	0.000524657	373295	0.93	bladder cancer	TRUE	NA	NA	NA	NA	NA	NA	NA	1.1e-20	1	198283058	3408	0.2281	TRUE	2	1	TRUE
CD28+ CD45RA+ CD8dim AC	rs56112048	A	C	A	C	-0.1157	8.87e-05	0.3385	0.247787	FALSE	FALSE	FALSE	ieu-b-4874	3	137006597	0.000158084	373295	0.57	bladder cancer	TRUE	NA	NA	NA	NA	NA	NA	NA	1.09e-06	3	137006597	3408	0.02368	TRUE	2	1	TRUE
CD28+ CD45RA+ CD8dim AC	rs574807	A	G	A	G	-0.1044	-5.04e-05	0.3999	0.457941	FALSE	FALSE	FALSE	ieu-b-4874	6	145543700	0.000136223	373295	0.709999	bladder cancer	TRUE	NA	NA	NA	NA	NA	NA	NA	5.47e-06	6	145543700	3408	0.02294	TRUE	2	1	TRUE
CD28+ CD45RA+ CD8dim AC	rs61038907	A	C	A	C	0.1398	0.000175998	0.2664	0.397603	FALSE	FALSE	FALSE	ieu-b-4874	2	87061070	0.000138326	373295	0.2	bladder cancer	TRUE	NA	NA	NA	NA	NA	NA	NA	2.72e-08	2	87061070	3408	0.02509	TRUE	2	1	TRUE
CD28+ CD45RA+ CD8dim AC	rs62229786	A	G	A	G	-0.3021	-0.00047264	0.0283	0.037578	FALSE	FALSE	FALSE	ieu-b-4874	20	50098150	0.000366705	373295	0.2	bladder cancer	TRUE	NA	NA	NA	NA	NA	NA	NA	5.51e-06	20	50098150	3408	0.06636	TRUE	2	1	TRUE
CD28+ CD45RA+ CD8dim AC	rs72763382	G	A	G	A	-0.4449	0.000166024	0.012	0.030294	FALSE	FALSE	FALSE	ieu-b-4874	15	97953052	0.000397121	373295	0.68	bladder cancer	TRUE	NA	NA	NA	NA	NA	NA	NA	8.26e-06	15	97953052	3408	0.09964	TRUE	2	1	TRUE
CD28+ CD45RA+ CD8dim AC	rs73193728	C	T	C	T	0.2069	0.000367914	0.0609	0.074803	FALSE	FALSE	FALSE	ieu-b-4874	21	32665618	0.000271811	373295	0.18	bladder cancer	TRUE	NA	NA	NA	NA	NA	NA	NA	9.2e-06	21	32665618	3408	0.04657	TRUE	2	1	TRUE
CD28+ CD45RA+ CD8dim AC	rs74577787	T	C	T	C	3.341	0.000107127	0.0003	0.015103	FALSE	FALSE	FALSE	ieu-b-4874	3	84799491	0.000558399	373295	0.85	bladder cancer	TRUE	NA	NA	NA	NA	NA	NA	NA	2.58e-08	3	84799491	3408	0.5986	TRUE	2	1	TRUE
CD28+ CD45RA+ CD8dim AC	rs7530076	A	G	A	G	-0.3874	-0.000277952	0.9746	0.970254	FALSE	FALSE	FALSE	ieu-b-4874	1	195825276	0.000397954	373295	0.48	bladder cancer	TRUE	NA	NA	NA	NA	NA	NA	NA	1.06e-07	1	195825276	3408	0.07271	TRUE	2	1	TRUE
CD28+ CD45RA+ CD8dim AC	rs7557121	T	C	T	C	-0.1308	-0.000239621	0.2347	0.328616	FALSE	FALSE	FALSE	ieu-b-4874	2	240520878	0.000144324	373295	0.0969996	bladder cancer	TRUE	NA	NA	NA	NA	NA	NA	NA	5.07e-07	2	240520878	3408	0.02599	TRUE	2	1	TRUE
CD28+ CD45RA+ CD8dim AC	rs76313555	T	C	T	C	0.5934	-0.000303459	0.0082	0.026302	FALSE	FALSE	FALSE	ieu-b-4874	3	59914042	0.000417046	373295	0.47	bladder cancer	TRUE	NA	NA	NA	NA	NA	NA	NA	8.24e-07	3	59914042	3408	0.1201	TRUE	2	1	TRUE
CD28+ CD45RA+ CD8dim AC	rs77935824	G	A	G	A	3.776	0.00152831	0.0001	0.012242	FALSE	FALSE	FALSE	ieu-b-4874	18	68968361	0.000614668	373295	0.0129999	bladder cancer	TRUE	NA	NA	NA	NA	NA	NA	NA	8.49e-06	18	68968361	3408	0.8468	TRUE	2	1	TRUE
CD28+ CD45RA+ CD8dim AC	rs78905646	A	G	A	G	0.3781	0.000165259	0.0232	0.024497	FALSE	FALSE	FALSE	ieu-b-4874	2	189898847	0.00043897	373295	0.709999	bladder cancer	TRUE	NA	NA	NA	NA	NA	NA	NA	2.32e-07	2	189898847	3408	0.07295	TRUE	2	1	TRUE
CD28+ CD45RA+ CD8dim AC	rs79827501	T	G	T	G	-0.2254	5.91e-05	0.0734	0.044701	FALSE	FALSE	FALSE	ieu-b-4874	2	38431267	0.000340034	373295	0.86	bladder cancer	TRUE	NA	NA	NA	NA	NA	NA	NA	1.51e-07	2	38431267	3408	0.04283	TRUE	2	1	TRUE
CD28+ CD45RA+ CD8dim AC	rs80172536	C	G	C	G	0.2289	-0.000345246	0.0508	0.026735	FALSE	TRUE	FALSE	ieu-b-4874	7	110737584	0.000436869	373295	0.43	bladder cancer	TRUE	NA	NA	NA	NA	NA	NA	NA	8.92e-06	7	110737584	3408	0.05146	TRUE	2	1	TRUE
CD28+ CD45RA+ CD8dim AC	rs80194890	G	T	G	T	4.583	-4.62e-05	0.0001	0.012205	FALSE	FALSE	FALSE	ieu-b-4874	10	91332621	0.00063202	373295	0.94	bladder cancer	TRUE	NA	NA	NA	NA	NA	NA	NA	9.6e-06	10	91332621	3408	1.034	TRUE	2	1	TRUE
CD24 on IgD+ CD38br	rs10056811	A	G	A	G	-0.1322	3.33e-05	0.3022	0.337182	FALSE	FALSE	FALSE	ieu-b-4874	5	74605220	0.000142961	373295	0.82	bladder cancer	TRUE	NA	NA	NA	NA	NA	NA	NA	1.62e-06	5	74605220	3655	0.02752	TRUE	2	1	TRUE
CD24 on IgD+ CD38br	rs10108273	A	T	A	T	0.1701	9.32e-05	0.1242	0.152047	FALSE	TRUE	FALSE	ieu-b-4874	8	85737573	0.000189289	373295	0.62	bladder cancer	TRUE	NA	NA	NA	NA	NA	NA	NA	5.28e-06	8	85737573	3655	0.0373	TRUE	2	1	TRUE
CD24 on IgD+ CD38br	rs114151424	A	G	A	G	1.159	-0.000781809	0.0036	0.046093	FALSE	FALSE	FALSE	ieu-b-4874	1	120674028	0.000348772	373295	0.025	bladder cancer	TRUE	NA	NA	NA	NA	NA	NA	NA	1.4e-07	1	120674028	3655	0.2197	TRUE	2	1	TRUE
CD24 on IgD+ CD38br	rs116032501	C	A	C	A	-0.1879	0.000478264	0.0992	0.030785	FALSE	FALSE	FALSE	ieu-b-4874	1	55983064	0.000391798	373295	0.22	bladder cancer	TRUE	NA	NA	NA	NA	NA	NA	NA	5.42e-06	1	55983064	3655	0.04125	TRUE	2	1	TRUE
CD24 on IgD+ CD38br	rs117920360	T	C	T	C	0.1459	0.000486393	0.1718	0.068726	FALSE	FALSE	FALSE	ieu-b-4874	18	58030683	0.000267286	373295	0.0690001	bladder cancer	TRUE	NA	NA	NA	NA	NA	NA	NA	8.28e-06	18	58030683	3655	0.03267	TRUE	2	1	TRUE
CD24 on IgD+ CD38br	rs139160176	C	G	C	G	-0.9719	0.000911697	0.0034	0.018685	FALSE	TRUE	FALSE	ieu-b-4874	5	13902245	0.000499478	373295	0.0680002	bladder cancer	TRUE	NA	NA	NA	NA	NA	NA	NA	1.61e-06	5	13902245	3655	0.2023	TRUE	2	1	TRUE
CD24 on IgD+ CD38br	rs146379662	T	C	T	C	0.5365	-1.26e-05	0.0111	0.021183	FALSE	FALSE	FALSE	ieu-b-4874	2	240297559	0.000478536	373295	0.98	bladder cancer	TRUE	TRUE	rs146379662	rs77979071	T	C	T	C	3.47e-06	2	240272688	3655	0.1154	TRUE	2	1	TRUE
CD24 on IgD+ CD38br	rs16923647	T	C	T	C	-0.164	0.000190149	0.1542	0.125043	FALSE	FALSE	FALSE	ieu-b-4874	12	21451395	0.000207883	373295	0.36	bladder cancer	TRUE	NA	NA	NA	NA	NA	NA	NA	1.79e-06	12	21451395	3655	0.03428	TRUE	2	1	TRUE
CD24 on IgD+ CD38br	rs1799693	G	A	G	A	-0.2018	-0.000324122	0.8286	0.928167	FALSE	FALSE	FALSE	ieu-b-4874	6	106992464	0.000261987	373295	0.22	bladder cancer	TRUE	NA	NA	NA	NA	NA	NA	NA	6.12e-10	6	106992464	3655	0.03253	TRUE	2	1	TRUE
CD24 on IgD+ CD38br	rs181036992	C	T	C	T	-0.4375	0.000397183	0.0186	0.028937	FALSE	FALSE	FALSE	ieu-b-4874	3	196496410	0.000405155	373295	0.33	bladder cancer	TRUE	NA	NA	NA	NA	NA	NA	NA	1.59e-06	3	196496410	3655	0.091	TRUE	2	1	TRUE
CD24 on IgD+ CD38br	rs3097667	C	G	C	G	-0.1519	-2.38e-05	0.2161	0.07807	FALSE	TRUE	FALSE	ieu-b-4874	6	33023723	0.000255275	373295	0.93	bladder cancer	TRUE	NA	NA	NA	NA	NA	NA	NA	1.61e-06	6	33023723	3655	0.03161	TRUE	2	1	TRUE
CD24 on IgD+ CD38br	rs35093039	A	G	A	G	-0.21	5.46e-05	0.0755	0.123451	FALSE	FALSE	FALSE	ieu-b-4874	5	24061216	0.000205537	373295	0.79	bladder cancer	TRUE	NA	NA	NA	NA	NA	NA	NA	9.99e-06	5	24061216	3655	0.04748	TRUE	2	1	TRUE
CD24 on IgD+ CD38br	rs4368221	C	G	C	G	0.1558	1.17e-05	0.1544	0.240395	FALSE	TRUE	FALSE	ieu-b-4874	18	45634445	0.00015875	373295	0.94	bladder cancer	TRUE	NA	NA	NA	NA	NA	NA	NA	4.33e-06	18	45634445	3655	0.03385	TRUE	2	1	TRUE
CD24 on IgD+ CD38br	rs45609135	A	G	A	G	-0.1767	2.39e-05	0.1085	0.063695	FALSE	FALSE	FALSE	ieu-b-4874	11	118942134	0.000279362	373295	0.93	bladder cancer	TRUE	NA	NA	NA	NA	NA	NA	NA	8.31e-06	11	118942134	3655	0.03959	TRUE	2	1	TRUE
CD24 on IgD+ CD38br	rs4765854	C	A	C	A	-0.2274	0.000401679	0.0625	0.114185	FALSE	FALSE	FALSE	ieu-b-4874	12	1997152	0.000212899	373295	0.0589997	bladder cancer	TRUE	NA	NA	NA	NA	NA	NA	NA	6.26e-06	12	1997152	3655	0.05027	TRUE	2	1	TRUE
CD24 on IgD+ CD38br	rs57680652	T	C	T	C	0.128	0.000216318	0.6404	0.694258	FALSE	FALSE	FALSE	ieu-b-4874	19	16362072	0.00014991	373295	0.15	bladder cancer	TRUE	NA	NA	NA	NA	NA	NA	NA	9.41e-07	19	16362072	3655	0.02606	TRUE	2	1	TRUE
CD24 on IgD+ CD38br	rs6666130	T	G	T	G	-0.2436	-0.000424375	0.061	0.026479	FALSE	FALSE	FALSE	ieu-b-4874	1	112374026	0.000426233	373295	0.32	bladder cancer	TRUE	NA	NA	NA	NA	NA	NA	NA	2.25e-06	1	112374026	3655	0.05141	TRUE	2	1	TRUE
CD24 on IgD+ CD38br	rs75059545	C	A	C	A	0.1761	-4.68e-05	0.117	0.16749	FALSE	FALSE	FALSE	ieu-b-4874	7	129584738	0.000181025	373295	0.8	bladder cancer	TRUE	NA	NA	NA	NA	NA	NA	NA	3.39e-06	7	129584738	3655	0.03786	TRUE	2	1	TRUE
CD24 on IgD+ CD38br	rs7781145	A	C	A	C	-0.1421	-5.05e-05	0.2397	0.260307	FALSE	FALSE	FALSE	ieu-b-4874	7	23626602	0.000154132	373295	0.74	bladder cancer	TRUE	NA	NA	NA	NA	NA	NA	NA	1.09e-06	7	23626602	3655	0.0291	TRUE	2	1	TRUE
CD24 on IgD+ CD38br	rs78405192	C	T	C	T	1.577	0.000415253	0.0012	0.030539	FALSE	FALSE	FALSE	ieu-b-4874	4	71295244	0.000409991	373295	0.31	bladder cancer	TRUE	NA	NA	NA	NA	NA	NA	NA	6.72e-06	4	71295244	3655	0.3497	TRUE	2	1	TRUE
CD24 on IgD+ CD38br	rs9326867	G	T	G	T	0.1697	2.6e-05	0.126	0.149905	FALSE	FALSE	FALSE	ieu-b-4874	5	112302830	0.000194511	373295	0.89	bladder cancer	TRUE	NA	NA	NA	NA	NA	NA	NA	5.04e-06	5	112302830	3655	0.03713	TRUE	2	1	TRUE
CD24 on IgD+ CD38br	rs9398107	G	A	G	A	-0.4386	-0.000155673	0.0555	0.056083	FALSE	FALSE	FALSE	ieu-b-4874	6	107155687	0.000293638	373295	0.6	bladder cancer	TRUE	NA	NA	NA	NA	NA	NA	NA	1.28e-15	6	107155687	3655	0.0546	TRUE	2	1	TRUE
CD24 on IgD+ CD38br	rs9452529	T	C	T	C	-0.5098	-0.000292174	0.013	0.096977	FALSE	FALSE	FALSE	ieu-b-4874	6	94734554	0.000229165	373295	0.2	bladder cancer	TRUE	NA	NA	NA	NA	NA	NA	NA	2.09e-06	6	94734554	3655	0.1073	TRUE	2	1	TRUE
Secreting Treg % CD4 Treg	rs10059100	G	A	G	A	0.1188	0.000110546	0.3224	0.364525	FALSE	FALSE	FALSE	ieu-b-4874	5	120120689	0.000140606	373295	0.43	bladder cancer	TRUE	TRUE	rs10059100	rs62379855	G	A	G	T	4.48e-06	5	120100784	3437	0.02585	TRUE	2	1	TRUE
Secreting Treg % CD4 Treg	rs113435341	G	A	G	A	-2.54	0.000269296	0.0032	0.019043	FALSE	FALSE	FALSE	ieu-b-4874	1	198151688	0.000520151	373295	0.6	bladder cancer	TRUE	NA	NA	NA	NA	NA	NA	NA	3.14e-33	1	198151688	3437	0.2093	TRUE	2	1	TRUE
Secreting Treg % CD4 Treg	rs11577174	T	C	T	C	1.612	8.64e-05	0.0012	0.014181	FALSE	FALSE	FALSE	ieu-b-4874	1	230492271	0.000593745	373295	0.88	bladder cancer	TRUE	NA	NA	NA	NA	NA	NA	NA	2.39e-06	1	230492271	3437	0.3412	TRUE	2	1	TRUE
Secreting Treg % CD4 Treg	rs11579717	A	G	A	G	-1.776	0.000269345	0.0044	0.048262	FALSE	FALSE	FALSE	ieu-b-4874	1	199999121	0.000323136	373295	0.4	bladder cancer	TRUE	NA	NA	NA	NA	NA	NA	NA	2.93e-23	1	199999121	3437	0.1774	TRUE	2	1	TRUE
Secreting Treg % CD4 Treg	rs11739607	C	T	C	T	-0.3801	0.000222462	0.0214	0.109657	FALSE	FALSE	FALSE	ieu-b-4874	5	27694229	0.000220837	373295	0.31	bladder cancer	TRUE	NA	NA	NA	NA	NA	NA	NA	4.42e-06	5	27694229	3437	0.08266	TRUE	2	1	TRUE
Secreting Treg % CD4 Treg	rs117608988	C	T	C	T	-0.7938	0.000666949	0.0044	0.01559	FALSE	FALSE	FALSE	ieu-b-4874	9	86285391	0.00056105	373295	0.23	bladder cancer	TRUE	NA	NA	NA	NA	NA	NA	NA	9.51e-06	9	86285391	3437	0.179	TRUE	2	1	TRUE
Secreting Treg % CD4 Treg	rs12744266	A	G	A	G	0.1243	8.4e-05	0.2979	0.336448	FALSE	FALSE	FALSE	ieu-b-4874	1	248047667	0.00014381	373295	0.56	bladder cancer	TRUE	NA	NA	NA	NA	NA	NA	NA	1.55e-06	1	248047667	3437	0.02583	TRUE	2	1	TRUE
Secreting Treg % CD4 Treg	rs12993274	C	A	C	A	0.1532	4.12e-05	0.1481	0.072275	FALSE	FALSE	FALSE	ieu-b-4874	2	42378770	0.000260778	373295	0.87	bladder cancer	TRUE	NA	NA	NA	NA	NA	NA	NA	6.3e-06	2	42378770	3437	0.03388	TRUE	2	1	TRUE
Secreting Treg % CD4 Treg	rs17607399	T	C	T	C	-0.2213	-0.000424336	0.1084	0.079235	FALSE	FALSE	FALSE	ieu-b-4874	2	41884212	0.000252096	373295	0.0920005	bladder cancer	TRUE	NA	NA	NA	NA	NA	NA	NA	1.44e-08	2	41884212	3437	0.03894	TRUE	2	1	TRUE
Secreting Treg % CD4 Treg	rs2148708	G	A	G	A	-0.2105	-1.53e-05	0.9326	0.884945	FALSE	FALSE	FALSE	ieu-b-4874	13	21794935	0.000213862	373295	0.94	bladder cancer	TRUE	NA	NA	NA	NA	NA	NA	NA	5.36e-06	13	21794935	3437	0.04618	TRUE	2	1	TRUE
Secreting Treg % CD4 Treg	rs273421	C	G	C	G	0.1507	0.000140199	0.8356	0.808212	FALSE	TRUE	FALSE	ieu-b-4874	8	132542825	0.000173307	373295	0.42	bladder cancer	TRUE	NA	NA	NA	NA	NA	NA	NA	1.76e-06	8	132542825	3437	0.03147	TRUE	2	1	TRUE
Secreting Treg % CD4 Treg	rs369976766	A	T	A	T	-1.008	0.000282309	0.0035	0.030097	FALSE	TRUE	FALSE	ieu-b-4874	22	28842645	0.000395815	373295	0.48	bladder cancer	TRUE	TRUE	rs369976766	rs77888326	A	T	C	T	2.67e-06	22	28835840	3437	0.2144	TRUE	2	1	TRUE
Secreting Treg % CD4 Treg	rs413431	G	A	G	A	0.2955	-0.000547684	0.8154	0.910712	FALSE	FALSE	FALSE	ieu-b-4874	2	39178859	0.000238169	373295	0.021	bladder cancer	TRUE	TRUE	rs413431	rs369749	A	G	C	A	3.31e-21	2	39176695	3437	0.03106	TRUE	2	1	TRUE
Secreting Treg % CD4 Treg	rs4759006	A	G	A	G	0.1495	-6.62e-05	0.1565	0.226758	FALSE	FALSE	FALSE	ieu-b-4874	12	56009543	0.000161288	373295	0.68	bladder cancer	TRUE	NA	NA	NA	NA	NA	NA	NA	7.07e-06	12	56009543	3437	0.03323	TRUE	2	1	TRUE
Secreting Treg % CD4 Treg	rs562562	A	G	A	G	0.1197	0.000258446	0.3714	0.332557	FALSE	FALSE	FALSE	ieu-b-4874	18	24263725	0.000143849	373295	0.0719996	bladder cancer	TRUE	NA	NA	NA	NA	NA	NA	NA	1.54e-06	18	24263725	3437	0.02486	TRUE	2	1	TRUE
Secreting Treg % CD4 Treg	rs60220946	T	C	T	C	-0.4131	-0.000907988	0.0212	0.018178	FALSE	FALSE	FALSE	ieu-b-4874	1	193505625	0.000543103	373295	0.0949992	bladder cancer	TRUE	NA	NA	NA	NA	NA	NA	NA	4.56e-07	1	193505625	3437	0.08175	TRUE	2	1	TRUE
Secreting Treg % CD4 Treg	rs62322628	T	C	T	C	-0.814	-0.000696929	0.0049	0.022412	FALSE	FALSE	FALSE	ieu-b-4874	4	122780838	0.000464315	373295	0.13	bladder cancer	TRUE	NA	NA	NA	NA	NA	NA	NA	3.83e-06	4	122780838	3437	0.1759	TRUE	2	1	TRUE
Secreting Treg % CD4 Treg	rs6751481	C	T	C	T	-0.2879	-8.27e-05	0.4709	0.518483	FALSE	FALSE	FALSE	ieu-b-4874	2	38897810	0.000136781	373295	0.55	bladder cancer	TRUE	NA	NA	NA	NA	NA	NA	NA	3.53e-33	2	38897810	3437	0.02374	TRUE	2	1	TRUE
Secreting Treg % CD4 Treg	rs72966214	C	T	C	T	-0.2131	8.44e-05	0.0701	0.032354	FALSE	FALSE	FALSE	ieu-b-4874	2	208014310	0.000382076	373295	0.83	bladder cancer	TRUE	NA	NA	NA	NA	NA	NA	NA	7.55e-06	2	208014310	3437	0.04753	TRUE	2	1	TRUE
Secreting Treg % CD4 Treg	rs73579441	C	T	C	T	-0.2123	-0.000215393	0.0716	0.054084	FALSE	FALSE	FALSE	ieu-b-4874	8	49024059	0.000308781	373295	0.49	bladder cancer	TRUE	NA	NA	NA	NA	NA	NA	NA	6.73e-06	8	49024059	3437	0.04708	TRUE	2	1	TRUE
Secreting Treg % CD4 Treg	rs75981740	G	A	G	A	0.212	0.000417136	0.0711	0.032729	FALSE	FALSE	FALSE	ieu-b-4874	1	5012020	0.000383537	373295	0.28	bladder cancer	TRUE	NA	NA	NA	NA	NA	NA	NA	3.98e-06	1	5012020	3437	0.04589	TRUE	2	1	TRUE
Secreting Treg % CD4 Treg	rs7825970	T	G	T	G	0.1091	-4.35e-05	0.5701	0.556743	FALSE	FALSE	FALSE	ieu-b-4874	8	3414155	0.000136143	373295	0.75	bladder cancer	TRUE	NA	NA	NA	NA	NA	NA	NA	6.77e-06	8	3414155	3437	0.0242	TRUE	2	1	TRUE
Secreting Treg % CD4 Treg	rs7893324	C	T	C	T	0.1629	4.25e-05	0.1562	0.147788	FALSE	FALSE	FALSE	ieu-b-4874	10	6111075	0.000190808	373295	0.82	bladder cancer	TRUE	NA	NA	NA	NA	NA	NA	NA	1.25e-06	10	6111075	3437	0.03354	TRUE	2	1	TRUE
Secreting Treg % CD4 Treg	rs79224901	C	G	C	G	-0.4074	-0.000551654	0.0221	0.019492	FALSE	TRUE	FALSE	ieu-b-4874	8	3651438	0.000489953	373295	0.26	bladder cancer	TRUE	NA	NA	NA	NA	NA	NA	NA	1.12e-06	8	3651438	3437	0.08352	TRUE	2	1	TRUE
Secreting Treg % CD4 Treg	rs79235233	G	C	G	C	0.2934	0.000316929	0.0342	0.067637	FALSE	TRUE	FALSE	ieu-b-4874	14	92726328	0.000270569	373295	0.24	bladder cancer	TRUE	NA	NA	NA	NA	NA	NA	NA	5.98e-06	14	92726328	3437	0.06472	TRUE	2	1	TRUE
Secreting Treg % CD4 Treg	rs79607503	A	G	A	G	-0.5285	-0.000384257	0.0097	0.016842	FALSE	FALSE	FALSE	ieu-b-4874	9	135102542	0.000525619	373295	0.46	bladder cancer	TRUE	NA	NA	NA	NA	NA	NA	NA	5.29e-06	9	135102542	3437	0.1159	TRUE	2	1	TRUE
Secreting Treg % CD4 Treg	rs9265947	C	T	C	T	0.1387	-0.000203191	0.5804	0.645577	FALSE	FALSE	FALSE	ieu-b-4874	6	31315165	0.000141763	373295	0.15	bladder cancer	TRUE	NA	NA	NA	NA	NA	NA	NA	8.15e-06	6	31315165	3437	0.03104	TRUE	2	1	TRUE
Activated & secreting Treg %CD4 Treg	rs10059100	G	A	G	A	0.1214	0.000110546	0.3224	0.364525	FALSE	FALSE	FALSE	ieu-b-4874	5	120120689	0.000140606	373295	0.43	bladder cancer	TRUE	TRUE	rs10059100	rs62379855	G	A	G	T	6.51e-07	5	120100784	3437	0.02435	TRUE	2	1	TRUE
Activated & secreting Treg %CD4 Treg	rs112553628	G	A	G	A	-0.2867	0.000152165	0.0352	0.068576	FALSE	FALSE	FALSE	ieu-b-4874	2	38077329	0.000267525	373295	0.57	bladder cancer	TRUE	NA	NA	NA	NA	NA	NA	NA	2.31e-06	2	38077329	3437	0.0606	TRUE	2	1	TRUE
Activated & secreting Treg %CD4 Treg	rs112637846	A	C	A	C	-2.712	9.61e-05	0.0003	0.02527	FALSE	FALSE	FALSE	ieu-b-4874	6	149114553	0.000434556	373295	0.82	bladder cancer	TRUE	NA	NA	NA	NA	NA	NA	NA	5.61e-06	6	149114553	3437	0.5963	TRUE	2	1	TRUE
Activated & secreting Treg %CD4 Treg	rs113000944	T	C	T	C	-0.2336	-0.000206765	0.063	0.030501	FALSE	FALSE	FALSE	ieu-b-4874	20	48836592	0.000404837	373295	0.61	bladder cancer	TRUE	NA	NA	NA	NA	NA	NA	NA	6.94e-07	20	48836592	3437	0.04699	TRUE	2	1	TRUE
Activated & secreting Treg %CD4 Treg	rs113435341	G	A	G	A	-2.621	0.000269296	0.0032	0.019043	FALSE	FALSE	FALSE	ieu-b-4874	1	198151688	0.000520151	373295	0.6	bladder cancer	TRUE	NA	NA	NA	NA	NA	NA	NA	6.33e-40	1	198151688	3437	0.1957	TRUE	2	1	TRUE
Activated & secreting Treg %CD4 Treg	rs115669925	A	G	A	G	4.109	0.000520648	0.0003	0.017449	FALSE	FALSE	FALSE	ieu-b-4874	2	111442886	0.000535647	373295	0.33	bladder cancer	TRUE	NA	NA	NA	NA	NA	NA	NA	5.65e-06	2	111442886	3437	0.9038	TRUE	2	1	TRUE
Activated & secreting Treg %CD4 Treg	rs11579717	A	G	A	G	-1.821	0.000269345	0.0044	0.048262	FALSE	FALSE	FALSE	ieu-b-4874	1	199999121	0.000323136	373295	0.4	bladder cancer	TRUE	NA	NA	NA	NA	NA	NA	NA	1.87e-27	1	199999121	3437	0.1663	TRUE	2	1	TRUE
Activated & secreting Treg %CD4 Treg	rs115907036	T	C	T	C	-0.4234	-0.000363356	0.0153	0.020416	FALSE	FALSE	FALSE	ieu-b-4874	2	37565488	0.000480011	373295	0.450001	bladder cancer	TRUE	TRUE	rs115907036	rs114786999	T	C	C	T	9.86e-06	2	37537677	3437	0.09565	TRUE	2	1	TRUE
Activated & secreting Treg %CD4 Treg	rs116850494	A	G	A	G	-0.4419	5.93e-05	0.0145	0.026817	FALSE	FALSE	FALSE	ieu-b-4874	13	60389778	0.000424891	373295	0.89	bladder cancer	TRUE	NA	NA	NA	NA	NA	NA	NA	2.92e-06	13	60389778	3437	0.09434	TRUE	2	1	TRUE
Activated & secreting Treg %CD4 Treg	rs11969660	T	C	T	C	-0.2112	-0.000120791	0.0592	0.127103	FALSE	FALSE	FALSE	ieu-b-4874	6	14395373	0.000204907	373295	0.56	bladder cancer	TRUE	NA	NA	NA	NA	NA	NA	NA	7.66e-06	6	14395373	3437	0.04712	TRUE	2	1	TRUE
Activated & secreting Treg %CD4 Treg	rs12722496	G	A	G	A	0.215	0.000358051	0.0611	0.109122	FALSE	FALSE	FALSE	ieu-b-4874	10	6096667	0.000216855	373295	0.0990011	bladder cancer	TRUE	NA	NA	NA	NA	NA	NA	NA	6.33e-06	10	6096667	3437	0.04755	TRUE	2	1	TRUE
Activated & secreting Treg %CD4 Treg	rs13000564	C	T	C	T	0.1141	-1.87e-05	0.2959	0.320302	FALSE	FALSE	FALSE	ieu-b-4874	2	41596014	0.00014616	373295	0.9	bladder cancer	TRUE	NA	NA	NA	NA	NA	NA	NA	4.62e-06	2	41596014	3437	0.02487	TRUE	2	1	TRUE
Activated & secreting Treg %CD4 Treg	rs138915779	A	C	A	C	-1.784	-8.13e-05	0.0035	0.022222	FALSE	FALSE	FALSE	ieu-b-4874	1	190079170	0.000476153	373295	0.86	bladder cancer	TRUE	NA	NA	NA	NA	NA	NA	NA	3.7e-18	1	190079170	3437	0.2042	TRUE	2	1	TRUE
Activated & secreting Treg %CD4 Treg	rs138960714	C	A	C	A	-2.124	0.000737094	0.0006	0.010184	FALSE	FALSE	FALSE	ieu-b-4874	4	123422719	0.000683206	373295	0.28	bladder cancer	TRUE	NA	NA	NA	NA	NA	NA	NA	2.59e-06	4	123422719	3437	0.451	TRUE	2	1	TRUE
Activated & secreting Treg %CD4 Treg	rs139681117	T	C	T	C	-0.2345	-0.000524982	0.0528	0.057844	FALSE	FALSE	FALSE	ieu-b-4874	2	23924920	0.000291169	373295	0.0710003	bladder cancer	TRUE	NA	NA	NA	NA	NA	NA	NA	5.65e-06	2	23924920	3437	0.05158	TRUE	2	1	TRUE
Activated & secreting Treg %CD4 Treg	rs150956189	C	T	C	T	-2.624	-0.000473786	0.0003	0.020593	FALSE	FALSE	FALSE	ieu-b-4874	1	214625781	0.000511386	373295	0.35	bladder cancer	TRUE	NA	NA	NA	NA	NA	NA	NA	4.02e-06	1	214625781	3437	0.5683	TRUE	2	1	TRUE
Activated & secreting Treg %CD4 Treg	rs1634783	A	G	A	G	0.1281	-0.000149979	0.5121	0.510302	FALSE	FALSE	FALSE	ieu-b-4874	6	31283604	0.000141796	373295	0.29	bladder cancer	TRUE	NA	NA	NA	NA	NA	NA	NA	6.75e-06	6	31283604	3437	0.0284	TRUE	2	1	TRUE
Activated & secreting Treg %CD4 Treg	rs17607399	T	C	T	C	-0.2077	-0.000424336	0.1084	0.079235	FALSE	FALSE	FALSE	ieu-b-4874	2	41884212	0.000252096	373295	0.0920005	bladder cancer	TRUE	NA	NA	NA	NA	NA	NA	NA	1.7e-08	2	41884212	3437	0.03673	TRUE	2	1	TRUE
Activated & secreting Treg %CD4 Treg	rs189383	C	T	C	T	0.1316	-0.000374859	0.1718	0.144206	FALSE	FALSE	FALSE	ieu-b-4874	2	8709770	0.000192586	373295	0.0519996	bladder cancer	TRUE	NA	NA	NA	NA	NA	NA	NA	8.08e-06	2	8709770	3437	0.02943	TRUE	2	1	TRUE
Activated & secreting Treg %CD4 Treg	rs191384725	G	A	G	A	-0.8475	0.000999365	0.0041	0.018305	FALSE	FALSE	FALSE	ieu-b-4874	16	7628264	0.000541866	373295	0.0649995	bladder cancer	TRUE	NA	NA	NA	NA	NA	NA	NA	6.35e-06	16	7628264	3437	0.1874	TRUE	2	1	TRUE
Activated & secreting Treg %CD4 Treg	rs273421	C	G	C	G	0.1317	0.000140199	0.8356	0.808212	FALSE	TRUE	FALSE	ieu-b-4874	8	132542825	0.000173307	373295	0.42	bladder cancer	TRUE	NA	NA	NA	NA	NA	NA	NA	9e-06	8	132542825	3437	0.02963	TRUE	2	1	TRUE
Activated & secreting Treg %CD4 Treg	rs3917863	A	G	A	G	-0.4303	-5.78e-05	0.016	0.012417	FALSE	FALSE	FALSE	ieu-b-4874	1	169592401	0.000623367	373295	0.93	bladder cancer	TRUE	NA	NA	NA	NA	NA	NA	NA	2.74e-06	1	169592401	3437	0.09161	TRUE	2	1	TRUE
Activated & secreting Treg %CD4 Treg	rs413431	G	A	G	A	0.2748	-0.000547684	0.8154	0.910712	FALSE	FALSE	FALSE	ieu-b-4874	2	39178859	0.000238169	373295	0.021	bladder cancer	TRUE	TRUE	rs413431	rs369749	A	G	C	A	1.16e-20	2	39176695	3437	0.0293	TRUE	2	1	TRUE
Activated & secreting Treg %CD4 Treg	rs60220946	T	C	T	C	-0.4053	-0.000907988	0.0212	0.018178	FALSE	FALSE	FALSE	ieu-b-4874	1	193505625	0.000543103	373295	0.0949992	bladder cancer	TRUE	NA	NA	NA	NA	NA	NA	NA	1.37e-07	1	193505625	3437	0.07676	TRUE	2	1	TRUE
Activated & secreting Treg %CD4 Treg	rs61828007	G	A	G	A	-0.356	0.00138531	0.0289	0.013662	FALSE	FALSE	FALSE	ieu-b-4874	1	203502968	0.000582607	373295	0.017	bladder cancer	TRUE	NA	NA	NA	NA	NA	NA	NA	2.13e-07	1	203502968	3437	0.06849	TRUE	2	1	TRUE
Activated & secreting Treg %CD4 Treg	rs6751481	C	T	C	T	-0.2903	-8.27e-05	0.4709	0.518483	FALSE	FALSE	FALSE	ieu-b-4874	2	38897810	0.000136781	373295	0.55	bladder cancer	TRUE	NA	NA	NA	NA	NA	NA	NA	6.29e-38	2	38897810	3437	0.02227	TRUE	2	1	TRUE
Activated & secreting Treg %CD4 Treg	rs72651876	T	C	T	C	-0.1135	3.49e-05	0.2699	0.153405	FALSE	FALSE	FALSE	ieu-b-4874	1	19206027	0.000191393	373295	0.86	bladder cancer	TRUE	NA	NA	NA	NA	NA	NA	NA	6.64e-06	1	19206027	3437	0.02516	TRUE	2	1	TRUE
Activated & secreting Treg %CD4 Treg	rs73579441	C	T	C	T	-0.1959	-0.000215393	0.0716	0.054084	FALSE	FALSE	FALSE	ieu-b-4874	8	49024059	0.000308781	373295	0.49	bladder cancer	TRUE	NA	NA	NA	NA	NA	NA	NA	9.82e-06	8	49024059	3437	0.04424	TRUE	2	1	TRUE
Activated & secreting Treg %CD4 Treg	rs7530076	A	G	A	G	0.4611	-0.000277952	0.9748	0.970254	FALSE	FALSE	FALSE	ieu-b-4874	1	195825276	0.000397954	373295	0.48	bladder cancer	TRUE	NA	NA	NA	NA	NA	NA	NA	4.5e-10	1	195825276	3437	0.07373	TRUE	2	1	TRUE
Activated & secreting Treg %CD4 Treg	rs78181865	A	G	A	G	-2.709	-0.000163178	0.0003	0.018259	FALSE	FALSE	FALSE	ieu-b-4874	3	84481659	0.000504157	373295	0.75	bladder cancer	TRUE	NA	NA	NA	NA	NA	NA	NA	5.51e-06	3	84481659	3437	0.5951	TRUE	2	1	TRUE
Activated & secreting Treg %CD4 Treg	rs9274712	T	C	T	C	0.1731	8.64e-05	0.3326	0.292105	FALSE	FALSE	FALSE	ieu-b-4874	6	32637298	0.000150167	373295	0.57	bladder cancer	TRUE	NA	NA	NA	NA	NA	NA	NA	5.81e-07	6	32637298	3437	0.03457	TRUE	2	1	TRUE
Activated & resting Treg % CD4 Treg	rs10059100	G	A	G	A	-0.1187	0.000110546	0.3224	0.364525	FALSE	FALSE	FALSE	ieu-b-4874	5	120120689	0.000140606	373295	0.43	bladder cancer	TRUE	TRUE	rs10059100	rs62379855	G	A	G	T	5.1e-06	5	120100784	3437	0.02599	TRUE	2	1	TRUE
Activated & resting Treg % CD4 Treg	rs113435341	G	A	G	A	2.569	0.000269296	0.0032	0.019043	FALSE	FALSE	FALSE	ieu-b-4874	1	198151688	0.000520151	373295	0.6	bladder cancer	TRUE	NA	NA	NA	NA	NA	NA	NA	1.28e-33	1	198151688	3437	0.2103	TRUE	2	1	TRUE
Activated & resting Treg % CD4 Treg	rs11577174	T	C	T	C	-1.588	8.64e-05	0.0012	0.014181	FALSE	FALSE	FALSE	ieu-b-4874	1	230492271	0.000593745	373295	0.88	bladder cancer	TRUE	NA	NA	NA	NA	NA	NA	NA	3.78e-06	1	230492271	3437	0.343	TRUE	2	1	TRUE
Activated & resting Treg % CD4 Treg	rs11579717	A	G	A	G	1.815	0.000269345	0.0044	0.048262	FALSE	FALSE	FALSE	ieu-b-4874	1	199999121	0.000323136	373295	0.4	bladder cancer	TRUE	NA	NA	NA	NA	NA	NA	NA	5.33e-24	1	199999121	3437	0.1783	TRUE	2	1	TRUE
Activated & resting Treg % CD4 Treg	rs11739607	C	T	C	T	0.3732	0.000222462	0.0214	0.109657	FALSE	FALSE	FALSE	ieu-b-4874	5	27694229	0.000220837	373295	0.31	bladder cancer	TRUE	NA	NA	NA	NA	NA	NA	NA	7.34e-06	5	27694229	3437	0.08311	TRUE	2	1	TRUE
Activated & resting Treg % CD4 Treg	rs12993274	C	A	C	A	-0.1538	4.12e-05	0.1481	0.072275	FALSE	FALSE	FALSE	ieu-b-4874	2	42378770	0.000260778	373295	0.87	bladder cancer	TRUE	NA	NA	NA	NA	NA	NA	NA	6.48e-06	2	42378770	3437	0.03406	TRUE	2	1	TRUE
Activated & resting Treg % CD4 Treg	rs17607399	T	C	T	C	0.218	-0.000424336	0.1084	0.079235	FALSE	FALSE	FALSE	ieu-b-4874	2	41884212	0.000252096	373295	0.0920005	bladder cancer	TRUE	NA	NA	NA	NA	NA	NA	NA	2.77e-08	2	41884212	3437	0.03915	TRUE	2	1	TRUE
Activated & resting Treg % CD4 Treg	rs2148708	G	A	G	A	0.2102	-1.53e-05	0.9326	0.884945	FALSE	FALSE	FALSE	ieu-b-4874	13	21794935	0.000213862	373295	0.94	bladder cancer	TRUE	NA	NA	NA	NA	NA	NA	NA	6.15e-06	13	21794935	3437	0.04643	TRUE	2	1	TRUE
Activated & resting Treg % CD4 Treg	rs273421	C	G	C	G	-0.1485	0.000140199	0.8356	0.808212	FALSE	TRUE	FALSE	ieu-b-4874	8	132542825	0.000173307	373295	0.42	bladder cancer	TRUE	NA	NA	NA	NA	NA	NA	NA	2.82e-06	8	132542825	3437	0.03164	TRUE	2	1	TRUE
Activated & resting Treg % CD4 Treg	rs369976766	A	T	A	T	1.032	0.000282309	0.0035	0.030097	FALSE	TRUE	FALSE	ieu-b-4874	22	28842645	0.000395815	373295	0.48	bladder cancer	TRUE	TRUE	rs369976766	rs77888326	A	T	C	T	1.74e-06	22	28835840	3437	0.2155	TRUE	2	1	TRUE
Activated & resting Treg % CD4 Treg	rs413431	G	A	G	A	-0.2936	-0.000547684	0.8154	0.910712	FALSE	FALSE	FALSE	ieu-b-4874	2	39178859	0.000238169	373295	0.021	bladder cancer	TRUE	TRUE	rs413431	rs369749	A	G	C	A	9.54e-21	2	39176695	3437	0.03123	TRUE	2	1	TRUE
Activated & resting Treg % CD4 Treg	rs4759006	A	G	A	G	-0.1503	-6.62e-05	0.1565	0.226758	FALSE	FALSE	FALSE	ieu-b-4874	12	56009543	0.000161288	373295	0.68	bladder cancer	TRUE	NA	NA	NA	NA	NA	NA	NA	7.03e-06	12	56009543	3437	0.0334	TRUE	2	1	TRUE
Activated & resting Treg % CD4 Treg	rs562562	A	G	A	G	-0.1195	0.000258446	0.3714	0.332557	FALSE	FALSE	FALSE	ieu-b-4874	18	24263725	0.000143849	373295	0.0719996	bladder cancer	TRUE	NA	NA	NA	NA	NA	NA	NA	1.81e-06	18	24263725	3437	0.02499	TRUE	2	1	TRUE
Activated & resting Treg % CD4 Treg	rs60220946	T	C	T	C	0.4221	-0.000907988	0.0212	0.018178	FALSE	FALSE	FALSE	ieu-b-4874	1	193505625	0.000543103	373295	0.0949992	bladder cancer	TRUE	NA	NA	NA	NA	NA	NA	NA	2.95e-07	1	193505625	3437	0.08216	TRUE	2	1	TRUE
Activated & resting Treg % CD4 Treg	rs62322628	T	C	T	C	0.7983	-0.000696929	0.0049	0.022412	FALSE	FALSE	FALSE	ieu-b-4874	4	122780838	0.000464315	373295	0.13	bladder cancer	TRUE	NA	NA	NA	NA	NA	NA	NA	6.55e-06	4	122780838	3437	0.1768	TRUE	2	1	TRUE
Activated & resting Treg % CD4 Treg	rs6587385	C	T	C	T	0.125	-7.42e-05	0.7012	0.627329	FALSE	FALSE	FALSE	ieu-b-4874	1	248047301	0.000141548	373295	0.6	bladder cancer	TRUE	TRUE	rs6587385	rs12037526	T	C	T	C	1.48e-06	1	248047256	3437	0.02593	TRUE	2	1	TRUE
Activated & resting Treg % CD4 Treg	rs6751481	C	T	C	T	0.2886	-8.27e-05	0.4709	0.518483	FALSE	FALSE	FALSE	ieu-b-4874	2	38897810	0.000136781	373295	0.55	bladder cancer	TRUE	NA	NA	NA	NA	NA	NA	NA	5.49e-33	2	38897810	3437	0.02387	TRUE	2	1	TRUE
Activated & resting Treg % CD4 Treg	rs73579441	C	T	C	T	0.2151	-0.000215393	0.0716	0.054084	FALSE	FALSE	FALSE	ieu-b-4874	8	49024059	0.000308781	373295	0.49	bladder cancer	TRUE	NA	NA	NA	NA	NA	NA	NA	5.71e-06	8	49024059	3437	0.04733	TRUE	2	1	TRUE
Activated & resting Treg % CD4 Treg	rs75981740	G	A	G	A	-0.2161	0.000417136	0.0711	0.032729	FALSE	FALSE	FALSE	ieu-b-4874	1	5012020	0.000383537	373295	0.28	bladder cancer	TRUE	NA	NA	NA	NA	NA	NA	NA	2.92e-06	1	5012020	3437	0.04613	TRUE	2	1	TRUE
Activated & resting Treg % CD4 Treg	rs7825970	T	G	T	G	-0.1086	-4.35e-05	0.5701	0.556743	FALSE	FALSE	FALSE	ieu-b-4874	8	3414155	0.000136143	373295	0.75	bladder cancer	TRUE	NA	NA	NA	NA	NA	NA	NA	8.28e-06	8	3414155	3437	0.02433	TRUE	2	1	TRUE
Activated & resting Treg % CD4 Treg	rs7893324	C	T	C	T	-0.1646	4.25e-05	0.1562	0.147788	FALSE	FALSE	FALSE	ieu-b-4874	10	6111075	0.000190808	373295	0.82	bladder cancer	TRUE	NA	NA	NA	NA	NA	NA	NA	1.09e-06	10	6111075	3437	0.03371	TRUE	2	1	TRUE
Activated & resting Treg % CD4 Treg	rs79224901	C	G	C	G	0.4155	-0.000551654	0.0221	0.019492	FALSE	TRUE	FALSE	ieu-b-4874	8	3651438	0.000489953	373295	0.26	bladder cancer	TRUE	NA	NA	NA	NA	NA	NA	NA	7.8e-07	8	3651438	3437	0.08395	TRUE	2	1	TRUE
Activated & resting Treg % CD4 Treg	rs79235233	G	C	G	C	-0.2939	0.000316929	0.0342	0.067637	FALSE	TRUE	FALSE	ieu-b-4874	14	92726328	0.000270569	373295	0.24	bladder cancer	TRUE	NA	NA	NA	NA	NA	NA	NA	6.49e-06	14	92726328	3437	0.06506	TRUE	2	1	TRUE
Activated & resting Treg % CD4 Treg	rs79607503	A	G	A	G	0.5324	-0.000384257	0.0097	0.016842	FALSE	FALSE	FALSE	ieu-b-4874	9	135102542	0.000525619	373295	0.46	bladder cancer	TRUE	NA	NA	NA	NA	NA	NA	NA	5.06e-06	9	135102542	3437	0.1165	TRUE	2	1	TRUE
Activated & resting Treg % CD4 Treg	rs9265947	C	T	C	T	-0.1408	-0.000203191	0.5804	0.645577	FALSE	FALSE	FALSE	ieu-b-4874	6	31315165	0.000141763	373295	0.15	bladder cancer	TRUE	NA	NA	NA	NA	NA	NA	NA	6.59e-06	6	31315165	3437	0.0312	TRUE	2	1	TRUE
Resting Treg % CD4 Treg	rs10059100	G	A	G	A	-0.1194	0.000110546	0.3224	0.364525	FALSE	FALSE	FALSE	ieu-b-4874	5	120120689	0.000140606	373295	0.43	bladder cancer	TRUE	TRUE	rs10059100	rs62379855	G	A	G	T	1.36e-06	5	120100784	3437	0.02467	TRUE	2	1	TRUE
Resting Treg % CD4 Treg	rs112553628	G	A	G	A	0.2951	0.000152165	0.0352	0.068576	FALSE	FALSE	FALSE	ieu-b-4874	2	38077329	0.000267525	373295	0.57	bladder cancer	TRUE	NA	NA	NA	NA	NA	NA	NA	1.54e-06	2	38077329	3437	0.06128	TRUE	2	1	TRUE
Resting Treg % CD4 Treg	rs116850494	A	G	A	G	0.4351	5.93e-05	0.0145	0.026817	FALSE	FALSE	FALSE	ieu-b-4874	13	60389778	0.000424891	373295	0.89	bladder cancer	TRUE	NA	NA	NA	NA	NA	NA	NA	5.17e-06	13	60389778	3437	0.09531	TRUE	2	1	TRUE
Resting Treg % CD4 Treg	rs12133465	G	A	G	A	0.7179	-0.000596031	0.0096	0.034767	FALSE	FALSE	FALSE	ieu-b-4874	1	195430336	0.000370512	373295	0.11	bladder cancer	TRUE	NA	NA	NA	NA	NA	NA	NA	6.33e-10	1	195430336	3437	0.1158	TRUE	2	1	TRUE
Resting Treg % CD4 Treg	rs12722496	G	A	G	A	-0.2244	0.000358051	0.0611	0.109122	FALSE	FALSE	FALSE	ieu-b-4874	10	6096667	0.000216855	373295	0.0990011	bladder cancer	TRUE	NA	NA	NA	NA	NA	NA	NA	3.35e-06	10	6096667	3437	0.0482	TRUE	2	1	TRUE
Resting Treg % CD4 Treg	rs12993274	C	A	C	A	-0.1476	4.12e-05	0.1481	0.072275	FALSE	FALSE	FALSE	ieu-b-4874	2	42378770	0.000260778	373295	0.87	bladder cancer	TRUE	NA	NA	NA	NA	NA	NA	NA	5.06e-06	2	42378770	3437	0.0323	TRUE	2	1	TRUE
Resting Treg % CD4 Treg	rs138915779	A	C	A	C	1.793	-8.13e-05	0.0035	0.022222	FALSE	FALSE	FALSE	ieu-b-4874	1	190079170	0.000476153	373295	0.86	bladder cancer	TRUE	NA	NA	NA	NA	NA	NA	NA	4.93e-18	1	190079170	3437	0.2061	TRUE	2	1	TRUE
Resting Treg % CD4 Treg	rs138960714	C	A	C	A	2.013	0.000737094	0.0006	0.010184	FALSE	FALSE	FALSE	ieu-b-4874	4	123422719	0.000683206	373295	0.28	bladder cancer	TRUE	NA	NA	NA	NA	NA	NA	NA	9.71e-06	4	123422719	3437	0.4545	TRUE	2	1	TRUE
Resting Treg % CD4 Treg	rs139681117	T	C	T	C	0.2445	-0.000524982	0.0528	0.057844	FALSE	FALSE	FALSE	ieu-b-4874	2	23924920	0.000291169	373295	0.0710003	bladder cancer	TRUE	NA	NA	NA	NA	NA	NA	NA	2.94e-06	2	23924920	3437	0.05221	TRUE	2	1	TRUE
Resting Treg % CD4 Treg	rs147071297	A	G	A	G	1.292	-0.000243507	0.0039	0.022535	FALSE	FALSE	FALSE	ieu-b-4874	1	191648600	0.00046497	373295	0.6	bladder cancer	TRUE	NA	NA	NA	NA	NA	NA	NA	6.14e-13	1	191648600	3437	0.1788	TRUE	2	1	TRUE
Resting Treg % CD4 Treg	rs150956189	C	T	C	T	2.691	-0.000473786	0.0003	0.020593	FALSE	FALSE	FALSE	ieu-b-4874	1	214625781	0.000511386	373295	0.35	bladder cancer	TRUE	NA	NA	NA	NA	NA	NA	NA	2.37e-06	1	214625781	3437	0.5693	TRUE	2	1	TRUE
Resting Treg % CD4 Treg	rs1634783	A	G	A	G	-0.1327	-0.000149979	0.5121	0.510302	FALSE	FALSE	FALSE	ieu-b-4874	6	31283604	0.000141796	373295	0.29	bladder cancer	TRUE	NA	NA	NA	NA	NA	NA	NA	5.13e-06	6	31283604	3437	0.02906	TRUE	2	1	TRUE
Resting Treg % CD4 Treg	rs17583875	A	G	A	G	2.714	-0.00022637	0.0029	0.020833	FALSE	FALSE	FALSE	ieu-b-4874	1	197924770	0.000473128	373295	0.630001	bladder cancer	TRUE	NA	NA	NA	NA	NA	NA	NA	3.22e-40	1	197924770	3437	0.2018	TRUE	2	1	TRUE
Resting Treg % CD4 Treg	rs17607399	T	C	T	C	0.209	-0.000424336	0.1084	0.079235	FALSE	FALSE	FALSE	ieu-b-4874	2	41884212	0.000252096	373295	0.0920005	bladder cancer	TRUE	NA	NA	NA	NA	NA	NA	NA	2.14e-08	2	41884212	3437	0.03723	TRUE	2	1	TRUE
Resting Treg % CD4 Treg	rs273421	C	G	C	G	-0.1329	0.000140199	0.8356	0.808212	FALSE	TRUE	FALSE	ieu-b-4874	8	132542825	0.000173307	373295	0.42	bladder cancer	TRUE	NA	NA	NA	NA	NA	NA	NA	9.37e-06	8	132542825	3437	0.02996	TRUE	2	1	TRUE
Resting Treg % CD4 Treg	rs413431	G	A	G	A	-0.2777	-0.000547684	0.8154	0.910712	FALSE	FALSE	FALSE	ieu-b-4874	2	39178859	0.000238169	373295	0.021	bladder cancer	TRUE	TRUE	rs413431	rs369749	A	G	C	A	1.47e-20	2	39176695	3437	0.02969	TRUE	2	1	TRUE
Resting Treg % CD4 Treg	rs60220946	T	C	T	C	0.4297	-0.000907988	0.0212	0.018178	FALSE	FALSE	FALSE	ieu-b-4874	1	193505625	0.000543103	373295	0.0949992	bladder cancer	TRUE	NA	NA	NA	NA	NA	NA	NA	3.08e-08	1	193505625	3437	0.07742	TRUE	2	1	TRUE
Resting Treg % CD4 Treg	rs61828007	G	A	G	A	0.3706	0.00138531	0.0289	0.013662	FALSE	FALSE	FALSE	ieu-b-4874	1	203502968	0.000582607	373295	0.017	bladder cancer	TRUE	NA	NA	NA	NA	NA	NA	NA	9.35e-08	1	203502968	3437	0.06927	TRUE	2	1	TRUE
Resting Treg % CD4 Treg	rs6751481	C	T	C	T	0.2946	-8.27e-05	0.4709	0.518483	FALSE	FALSE	FALSE	ieu-b-4874	2	38897810	0.000136781	373295	0.55	bladder cancer	TRUE	NA	NA	NA	NA	NA	NA	NA	3.4e-38	2	38897810	3437	0.02252	TRUE	2	1	TRUE
Resting Treg % CD4 Treg	rs73124650	C	T	C	T	0.3448	-0.000117244	0.0249	0.014149	FALSE	FALSE	FALSE	ieu-b-4874	20	47523429	0.000575938	373295	0.84	bladder cancer	TRUE	NA	NA	NA	NA	NA	NA	NA	1.92e-06	20	47523429	3437	0.07228	TRUE	2	1	TRUE
Resting Treg % CD4 Treg	rs7530076	A	G	A	G	-0.463	-0.000277952	0.9748	0.970254	FALSE	FALSE	FALSE	ieu-b-4874	1	195825276	0.000397954	373295	0.48	bladder cancer	TRUE	NA	NA	NA	NA	NA	NA	NA	5.95e-10	1	195825276	3437	0.07456	TRUE	2	1	TRUE
Resting Treg % CD4 Treg	rs76584473	A	G	A	G	0.2968	-0.000419725	0.0304	0.036058	FALSE	FALSE	FALSE	ieu-b-4874	2	73109350	0.000375629	373295	0.26	bladder cancer	TRUE	NA	NA	NA	NA	NA	NA	NA	7.69e-06	2	73109350	3437	0.06625	TRUE	2	1	TRUE
Resting Treg % CD4 Treg	rs78144227	A	G	A	G	0.2555	0.000557294	0.0444	0.010385	FALSE	FALSE	FALSE	ieu-b-4874	1	203602440	0.000710185	373295	0.43	bladder cancer	TRUE	NA	NA	NA	NA	NA	NA	NA	7.66e-06	1	203602440	3437	0.05701	TRUE	2	1	TRUE
Resting Treg % CD4 Treg	rs79670457	T	C	T	C	0.2321	-0.000128122	0.0541	0.023004	FALSE	FALSE	FALSE	ieu-b-4874	20	47437969	0.000454184	373295	0.780001	bladder cancer	TRUE	NA	NA	NA	NA	NA	NA	NA	2.23e-06	20	47437969	3437	0.04896	TRUE	2	1	TRUE
Resting Treg % CD4 Treg	rs9274712	T	C	T	C	-0.1758	8.64e-05	0.3326	0.292105	FALSE	FALSE	FALSE	ieu-b-4874	6	32637298	0.000150167	373295	0.57	bladder cancer	TRUE	NA	NA	NA	NA	NA	NA	NA	6.8e-07	6	32637298	3437	0.03533	TRUE	2	1	TRUE
CD39+ activated Treg AC	rs10059458	C	T	C	T	0.1184	-7e-05	0.6101	0.473733	FALSE	FALSE	FALSE	ieu-b-4874	5	73681489	0.000135676	373295	0.61	bladder cancer	TRUE	NA	NA	NA	NA	NA	NA	NA	8.52e-06	5	73681489	3405	0.02655	TRUE	2	1	TRUE
CD39+ activated Treg AC	rs10786199	A	G	A	G	-0.189	1.76e-05	0.2894	0.403143	FALSE	FALSE	FALSE	ieu-b-4874	10	97069472	0.000138061	373295	0.9	bladder cancer	TRUE	NA	NA	NA	NA	NA	NA	NA	5.63e-11	10	97069472	3405	0.02875	TRUE	2	1	TRUE
CD39+ activated Treg AC	rs10882701	C	A	C	A	-0.3631	0.000317478	0.514	0.589843	FALSE	FALSE	FALSE	ieu-b-4874	10	97741071	0.000142525	373295	0.0259998	bladder cancer	TRUE	NA	NA	NA	NA	NA	NA	NA	1.8e-45	10	97741071	3405	0.02528	TRUE	2	1	TRUE
CD39+ activated Treg AC	rs11002579	A	G	A	G	-0.1316	-0.000100909	0.3366	0.236476	FALSE	FALSE	FALSE	ieu-b-4874	10	80258836	0.000159997	373295	0.53	bladder cancer	TRUE	NA	NA	NA	NA	NA	NA	NA	1.46e-06	10	80258836	3405	0.02727	TRUE	2	1	TRUE
CD39+ activated Treg AC	rs111806244	T	C	T	C	-0.3653	0.000703685	0.0476	0.032231	FALSE	FALSE	FALSE	ieu-b-4874	10	47637202	0.000466245	373295	0.13	bladder cancer	TRUE	NA	NA	NA	NA	NA	NA	NA	3.26e-06	10	47637202	3405	0.07836	TRUE	2	1	TRUE
CD39+ activated Treg AC	rs11188757	C	A	C	A	-0.2494	-2.45e-05	0.2213	0.313644	FALSE	FALSE	FALSE	ieu-b-4874	10	98205222	0.00014606	373295	0.87	bladder cancer	TRUE	NA	NA	NA	NA	NA	NA	NA	3.06e-15	10	98205222	3405	0.03146	TRUE	2	1	TRUE
CD39+ activated Treg AC	rs11777493	A	T	A	T	-0.1467	-0.000182757	0.2395	0.254725	FALSE	TRUE	FALSE	ieu-b-4874	8	113921646	0.000156424	373295	0.24	bladder cancer	TRUE	NA	NA	NA	NA	NA	NA	NA	1.57e-06	8	113921646	3405	0.0305	TRUE	2	1	TRUE
CD39+ activated Treg AC	rs11795139	T	C	T	C	0.1205	0.000254131	0.3335	0.282034	FALSE	FALSE	FALSE	ieu-b-4874	9	86150415	0.000150095	373295	0.0899995	bladder cancer	TRUE	NA	NA	NA	NA	NA	NA	NA	9.23e-06	9	86150415	3405	0.02712	TRUE	2	1	TRUE
CD39+ activated Treg AC	rs12648210	G	A	G	A	-0.5171	-0.00015715	0.0145	0.061543	FALSE	FALSE	FALSE	ieu-b-4874	4	89266460	0.000281875	373295	0.58	bladder cancer	TRUE	NA	NA	NA	NA	NA	NA	NA	1.02e-06	4	89266460	3405	0.1056	TRUE	2	1	TRUE
CD39+ activated Treg AC	rs12707040	A	G	A	G	0.1591	0.000131842	0.1783	0.204893	FALSE	FALSE	FALSE	ieu-b-4874	7	80480551	0.000167855	373295	0.43	bladder cancer	TRUE	NA	NA	NA	NA	NA	NA	NA	3.37e-06	7	80480551	3405	0.03418	TRUE	2	1	TRUE
CD39+ activated Treg AC	rs139577399	C	T	C	T	-0.3155	0.000436215	0.0414	0.012121	FALSE	FALSE	FALSE	ieu-b-4874	7	23203415	0.000684766	373295	0.52	bladder cancer	TRUE	NA	NA	NA	NA	NA	NA	NA	1.08e-06	7	23203415	3405	0.06457	TRUE	2	1	TRUE
CD39+ activated Treg AC	rs139917391	T	C	T	C	2.666	-0.00100057	0.0004	0.015613	FALSE	FALSE	FALSE	ieu-b-4874	16	18152860	0.000648204	373295	0.12	bladder cancer	TRUE	NA	NA	NA	NA	NA	NA	NA	3.16e-06	16	18152860	3405	0.5711	TRUE	2	1	TRUE
CD39+ activated Treg AC	rs142422333	T	C	T	C	-0.2705	0.000596904	0.0515	0.009912	FALSE	FALSE	FALSE	ieu-b-4874	5	155414481	0.000723913	373295	0.41	bladder cancer	TRUE	TRUE	rs142422333	rs76954270	T	C	T	C	4.78e-06	5	155375550	3405	0.05905	TRUE	2	1	TRUE
CD39+ activated Treg AC	rs202211780	G	A	G	A	0.4192	4.6e-05	0.0878	0.201982	FALSE	FALSE	FALSE	ieu-b-4874	10	97024302	0.000168593	373295	0.79	bladder cancer	TRUE	TRUE	rs202211780	rs45550034	G	A	C	G	1.02e-19	10	97016742	3405	0.04585	TRUE	2	1	TRUE
CD39+ activated Treg AC	rs2251521	T	C	T	C	-0.197	-6.58e-05	0.1021	0.207094	FALSE	FALSE	FALSE	ieu-b-4874	10	109471331	0.000167876	373295	0.7	bladder cancer	TRUE	NA	NA	NA	NA	NA	NA	NA	4.28e-06	10	109471331	3405	0.04279	TRUE	2	1	TRUE
CD39+ activated Treg AC	rs289708	G	A	G	A	0.1372	-2.44e-05	0.7573	0.852976	FALSE	FALSE	FALSE	ieu-b-4874	16	57038162	0.000191341	373295	0.9	bladder cancer	TRUE	NA	NA	NA	NA	NA	NA	NA	3.77e-06	16	57038162	3405	0.02962	TRUE	2	1	TRUE
CD39+ activated Treg AC	rs35163827	G	A	G	A	-0.3443	-9.21e-05	0.0391	0.0161	FALSE	FALSE	FALSE	ieu-b-4874	8	9606332	0.000537036	373295	0.86	bladder cancer	TRUE	NA	NA	NA	NA	NA	NA	NA	1.65e-06	8	9606332	3405	0.07172	TRUE	2	1	TRUE
CD39+ activated Treg AC	rs4321083	A	G	A	G	0.1497	-0.000283732	0.2137	0.255382	FALSE	FALSE	FALSE	ieu-b-4874	13	84031916	0.00015678	373295	0.0700003	bladder cancer	TRUE	NA	NA	NA	NA	NA	NA	NA	2.12e-06	13	84031916	3405	0.03152	TRUE	2	1	TRUE
CD39+ activated Treg AC	rs4441121	G	A	G	A	0.125	-0.000201643	0.3192	0.263463	FALSE	FALSE	FALSE	ieu-b-4874	13	19651354	0.000153975	373295	0.19	bladder cancer	TRUE	TRUE	rs4441121	rs10467647	G	A	T	C	3.85e-06	13	19650584	3405	0.02703	TRUE	2	1	TRUE
CD39+ activated Treg AC	rs4811602	A	G	A	G	0.1348	-0.000102337	0.4019	0.464585	FALSE	FALSE	FALSE	ieu-b-4874	20	36849088	0.000136724	373295	0.450001	bladder cancer	TRUE	NA	NA	NA	NA	NA	NA	NA	2.65e-07	20	36849088	3405	0.02614	TRUE	2	1	TRUE
CD39+ activated Treg AC	rs56197234	A	G	A	G	0.5601	-0.000553175	0.0115	0.055478	FALSE	FALSE	FALSE	ieu-b-4874	15	70222702	0.000294747	373295	0.061	bladder cancer	TRUE	NA	NA	NA	NA	NA	NA	NA	2.54e-06	15	70222702	3405	0.1188	TRUE	2	1	TRUE
CD39+ activated Treg AC	rs618250	T	C	T	C	0.3109	0.000305176	0.0457	0.030148	FALSE	FALSE	FALSE	ieu-b-4874	18	362116	0.000394811	373295	0.44	bladder cancer	TRUE	NA	NA	NA	NA	NA	NA	NA	2.51e-07	18	362116	3405	0.06017	TRUE	2	1	TRUE
CD39+ activated Treg AC	rs7088584	T	G	T	G	0.8768	-7.31e-05	0.4687	0.552143	FALSE	FALSE	FALSE	ieu-b-4874	10	97607644	0.000135861	373295	0.59	bladder cancer	TRUE	NA	NA	NA	NA	NA	NA	NA	1e-200	10	97607644	3405	0.02116	TRUE	2	1	TRUE
CD39+ activated Treg AC	rs72809762	T	C	T	C	0.3373	0.000228127	0.0675	0.037281	FALSE	FALSE	FALSE	ieu-b-4874	10	97294154	0.000358143	373295	0.52	bladder cancer	TRUE	NA	NA	NA	NA	NA	NA	NA	4.74e-11	10	97294154	3405	0.0511	TRUE	2	1	TRUE
CD39+ activated Treg AC	rs7432284	C	A	C	A	0.2441	-0.000123863	0.068	0.061853	FALSE	FALSE	FALSE	ieu-b-4874	3	186094684	0.000282872	373295	0.66	bladder cancer	TRUE	NA	NA	NA	NA	NA	NA	NA	1.2e-06	3	186094684	3405	0.05017	TRUE	2	1	TRUE
CD39+ activated Treg AC	rs77020191	G	C	G	C	0.2605	0.000364452	0.0542	0.066772	FALSE	TRUE	FALSE	ieu-b-4874	15	59643449	0.000271528	373295	0.18	bladder cancer	TRUE	NA	NA	NA	NA	NA	NA	NA	5.66e-06	15	59643449	3405	0.05731	TRUE	2	1	TRUE
CD39+ activated Treg AC	rs78027772	A	G	A	G	0.2212	-0.00011511	0.0846	0.114622	FALSE	FALSE	FALSE	ieu-b-4874	7	126248228	0.000217788	373295	0.6	bladder cancer	TRUE	NA	NA	NA	NA	NA	NA	NA	2.29e-06	7	126248228	3405	0.04672	TRUE	2	1	TRUE
CD39+ activated Treg AC	rs8076447	A	G	A	G	0.1337	-1.27e-05	0.2515	0.175432	FALSE	FALSE	FALSE	ieu-b-4874	17	75229883	0.000179186	373295	0.94	bladder cancer	TRUE	NA	NA	NA	NA	NA	NA	NA	5.09e-06	17	75229883	3405	0.02928	TRUE	2	1	TRUE
SSC-A on NKT	rs1006368	T	C	T	C	0.2024	0.000156718	0.1224	0.110615	FALSE	FALSE	FALSE	ieu-b-4874	10	126346603	0.000215676	373295	0.47	bladder cancer	TRUE	NA	NA	NA	NA	NA	NA	NA	6.82e-07	10	126346603	3113	0.04066	TRUE	2	1	TRUE
SSC-A on NKT	rs10422871	T	C	T	C	-0.2765	-4.72e-06	0.0888	0.08305	FALSE	FALSE	FALSE	ieu-b-4874	19	8789227	0.00024552	373295	0.98	bladder cancer	TRUE	NA	NA	NA	NA	NA	NA	NA	3.6e-09	19	8789227	3113	0.04672	TRUE	2	1	TRUE
SSC-A on NKT	rs10749775	A	C	A	C	0.1882	0.000135892	0.8657	0.875131	FALSE	FALSE	FALSE	ieu-b-4874	1	67822087	0.000204835	373295	0.51	bladder cancer	TRUE	NA	NA	NA	NA	NA	NA	NA	1.8e-06	1	67822087	3113	0.03934	TRUE	2	1	TRUE
SSC-A on NKT	rs10765790	C	T	C	T	0.1554	7.31e-05	0.5524	0.539415	FALSE	FALSE	FALSE	ieu-b-4874	11	95852734	0.00013597	373295	0.59	bladder cancer	TRUE	NA	NA	NA	NA	NA	NA	NA	1.55e-08	11	95852734	3113	0.02741	TRUE	2	1	TRUE
SSC-A on NKT	rs11644532	A	G	A	G	0.2024	0.000360533	0.1145	0.062476	FALSE	FALSE	FALSE	ieu-b-4874	16	70657660	0.000283481	373295	0.2	bladder cancer	TRUE	NA	NA	NA	NA	NA	NA	NA	5.94e-06	16	70657660	3113	0.04461	TRUE	2	1	TRUE
SSC-A on NKT	rs118042158	C	T	C	T	0.867	-0.000579986	0.0051	0.014975	FALSE	FALSE	FALSE	ieu-b-4874	13	97456459	0.000557486	373295	0.3	bladder cancer	TRUE	NA	NA	NA	NA	NA	NA	NA	8.96e-06	13	97456459	3113	0.1949	TRUE	2	1	TRUE
SSC-A on NKT	rs12716653	C	T	C	T	-0.1377	1.12e-06	0.6349	0.59787	FALSE	FALSE	FALSE	ieu-b-4874	9	89886037	0.000138766	373295	0.99	bladder cancer	TRUE	NA	NA	NA	NA	NA	NA	NA	1.2e-06	9	89886037	3113	0.02831	TRUE	2	1	TRUE
SSC-A on NKT	rs138822248	A	G	A	G	-0.5658	-0.000334752	0.0111	0.011171	FALSE	FALSE	FALSE	ieu-b-4874	2	152970607	0.000769791	373295	0.66	bladder cancer	TRUE	NA	NA	NA	NA	NA	NA	NA	9.58e-06	2	152970607	3113	0.1276	TRUE	2	1	TRUE
SSC-A on NKT	rs140151332	T	C	T	C	-0.2992	-0.000549555	0.0405	0.013425	FALSE	FALSE	FALSE	ieu-b-4874	17	18368011	0.000713253	373295	0.44	bladder cancer	TRUE	NA	NA	NA	NA	NA	NA	NA	9.75e-06	17	18368011	3113	0.06754	TRUE	2	1	TRUE
SSC-A on NKT	rs2109396	A	C	A	C	-0.1485	-0.000143485	0.7498	0.696905	FALSE	FALSE	FALSE	ieu-b-4874	7	14933955	0.000149868	373295	0.34	bladder cancer	TRUE	NA	NA	NA	NA	NA	NA	NA	2.26e-06	7	14933955	3113	0.03134	TRUE	2	1	TRUE
SSC-A on NKT	rs2198787	C	A	C	A	-0.2554	0.000522673	0.9269	0.966764	FALSE	FALSE	FALSE	ieu-b-4874	12	62296066	0.000376836	373295	0.17	bladder cancer	TRUE	NA	NA	NA	NA	NA	NA	NA	1.33e-06	12	62296066	3113	0.05271	TRUE	2	1	TRUE
SSC-A on NKT	rs276951	T	C	T	C	-0.148	-0.000100478	0.2713	0.166337	FALSE	FALSE	FALSE	ieu-b-4874	16	86243187	0.00018228	373295	0.58	bladder cancer	TRUE	NA	NA	NA	NA	NA	NA	NA	7.54e-07	16	86243187	3113	0.02986	TRUE	2	1	TRUE
SSC-A on NKT	rs35060274	G	T	G	T	0.159	8.07e-05	0.1919	0.228212	FALSE	FALSE	FALSE	ieu-b-4874	8	58338298	0.000161129	373295	0.62	bladder cancer	TRUE	NA	NA	NA	NA	NA	NA	NA	2.69e-06	8	58338298	3113	0.03382	TRUE	2	1	TRUE
SSC-A on NKT	rs4707956	A	C	A	C	0.1305	-0.000120542	0.2812	0.28846	FALSE	FALSE	FALSE	ieu-b-4874	6	72648340	0.000149782	373295	0.42	bladder cancer	TRUE	NA	NA	NA	NA	NA	NA	NA	9.27e-06	6	72648340	3113	0.02938	TRUE	2	1	TRUE
SSC-A on NKT	rs55657662	A	C	A	C	0.135	-4.5e-05	0.2605	0.24377	FALSE	FALSE	FALSE	ieu-b-4874	13	102674496	0.00015782	373295	0.780001	bladder cancer	TRUE	NA	NA	NA	NA	NA	NA	NA	9.26e-06	13	102674496	3113	0.03039	TRUE	2	1	TRUE
SSC-A on NKT	rs6783507	C	T	C	T	-0.245	0.000222085	0.0634	0.044779	FALSE	FALSE	FALSE	ieu-b-4874	3	123518258	0.000340747	373295	0.51	bladder cancer	TRUE	NA	NA	NA	NA	NA	NA	NA	1e-05	3	123518258	3113	0.05538	TRUE	2	1	TRUE
SSC-A on NKT	rs6918518	C	A	C	A	0.1324	-5.12e-05	0.3977	0.497731	FALSE	FALSE	FALSE	ieu-b-4874	6	158930696	0.000135987	373295	0.709999	bladder cancer	TRUE	NA	NA	NA	NA	NA	NA	NA	1.74e-06	6	158930696	3113	0.02764	TRUE	2	1	TRUE
SSC-A on NKT	rs7183698	C	A	C	A	0.1252	9.75e-05	0.3816	0.451886	FALSE	FALSE	FALSE	ieu-b-4874	15	64870152	0.000135872	373295	0.47	bladder cancer	TRUE	NA	NA	NA	NA	NA	NA	NA	7.7e-06	15	64870152	3113	0.02793	TRUE	2	1	TRUE
SSC-A on NKT	rs74777495	T	G	T	G	1.36	-6e-05	0.0021	0.021736	FALSE	FALSE	FALSE	ieu-b-4874	18	58910278	0.00046369	373295	0.9	bladder cancer	TRUE	NA	NA	NA	NA	NA	NA	NA	4.21e-06	18	58910278	3113	0.2951	TRUE	2	1	TRUE
SSC-A on NKT	rs78201778	A	G	A	G	2.293	-0.000429685	0.0006	0.018871	FALSE	FALSE	FALSE	ieu-b-4874	12	45872353	0.000515507	373295	0.4	bladder cancer	TRUE	NA	NA	NA	NA	NA	NA	NA	7.26e-06	12	45872353	3113	0.5103	TRUE	2	1	TRUE
SSC-A on NKT	rs79523120	C	T	C	T	-2.525	0.000895254	0.0008	0.017303	FALSE	FALSE	FALSE	ieu-b-4874	6	66414139	0.000528579	373295	0.0899995	bladder cancer	TRUE	NA	NA	NA	NA	NA	NA	NA	1.13e-06	6	66414139	3113	0.5177	TRUE	2	1	TRUE
SSC-A on NK	rs1006368	T	C	T	C	0.4144	0.000156718	0.1224	0.110615	FALSE	FALSE	FALSE	ieu-b-4874	10	126346603	0.000215676	373295	0.47	bladder cancer	TRUE	NA	NA	NA	NA	NA	NA	NA	3.61e-24	10	126346603	3113	0.04052	TRUE	2	1	TRUE
SSC-A on NK	rs10512469	T	C	T	C	-0.1684	-8.92e-05	0.1646	0.172768	FALSE	FALSE	FALSE	ieu-b-4874	17	33770802	0.000178909	373295	0.62	bladder cancer	TRUE	NA	NA	NA	NA	NA	NA	NA	4.31e-06	17	33770802	3113	0.03658	TRUE	2	1	TRUE
SSC-A on NK	rs11081793	G	A	G	A	-0.3945	8.89e-06	0.0255	0.021369	FALSE	FALSE	FALSE	ieu-b-4874	18	19722536	0.000467333	373295	0.98	bladder cancer	TRUE	NA	NA	NA	NA	NA	NA	NA	2.57e-06	18	19722536	3113	0.08374	TRUE	2	1	TRUE
SSC-A on NK	rs11703193	A	G	A	G	-0.1793	-1.68e-05	0.1597	0.191338	FALSE	FALSE	FALSE	ieu-b-4874	22	18542023	0.000182738	373295	0.93	bladder cancer	TRUE	NA	NA	NA	NA	NA	NA	NA	1.57e-06	22	18542023	3113	0.03727	TRUE	2	1	TRUE
SSC-A on NK	rs12594783	C	T	C	T	-0.1395	-0.000245506	0.2535	0.250295	FALSE	FALSE	FALSE	ieu-b-4874	15	88040400	0.000156366	373295	0.12	bladder cancer	TRUE	NA	NA	NA	NA	NA	NA	NA	5.42e-06	15	88040400	3113	0.03061	TRUE	2	1	TRUE
SSC-A on NK	rs147596499	G	A	G	A	0.4951	-0.000290943	0.0154	0.009895	FALSE	FALSE	FALSE	ieu-b-4874	4	96489377	0.00068673	373295	0.67	bladder cancer	TRUE	NA	NA	NA	NA	NA	NA	NA	6.78e-06	4	96489377	3113	0.1098	TRUE	2	1	TRUE
SSC-A on NK	rs17606146	A	G	A	G	-0.2168	0.000373964	0.0858	0.040023	FALSE	FALSE	FALSE	ieu-b-4874	19	3631134	0.000359299	373295	0.3	bladder cancer	TRUE	NA	NA	NA	NA	NA	NA	NA	6.37e-06	19	3631134	3113	0.04794	TRUE	2	1	TRUE
SSC-A on NK	rs188107682	A	G	A	G	-0.4965	0.00105246	0.0162	0.009883	FALSE	FALSE	FALSE	ieu-b-4874	5	170062959	0.000742496	373295	0.16	bladder cancer	TRUE	NA	NA	NA	NA	NA	NA	NA	5.74e-06	5	170062959	3113	0.1093	TRUE	2	1	TRUE
SSC-A on NK	rs2198787	C	A	C	A	-0.2652	0.000522673	0.9269	0.966764	FALSE	FALSE	FALSE	ieu-b-4874	12	62296066	0.000376836	373295	0.17	bladder cancer	TRUE	NA	NA	NA	NA	NA	NA	NA	6.55e-07	12	62296066	3113	0.05319	TRUE	2	1	TRUE
SSC-A on NK	rs28691703	C	T	C	T	0.1706	5.14e-05	0.2127	0.265672	FALSE	FALSE	FALSE	ieu-b-4874	19	43649306	0.000151814	373295	0.73	bladder cancer	TRUE	NA	NA	NA	NA	NA	NA	NA	2.87e-06	19	43649306	3113	0.03639	TRUE	2	1	TRUE
SSC-A on NK	rs2869804	G	A	G	A	-0.1514	0.000172751	0.8008	0.747277	FALSE	FALSE	FALSE	ieu-b-4874	18	14141133	0.000156804	373295	0.27	bladder cancer	TRUE	NA	NA	NA	NA	NA	NA	NA	7.08e-06	18	14141133	3113	0.03364	TRUE	2	1	TRUE
SSC-A on NK	rs6850820	A	G	A	G	-0.1642	4.85e-05	0.8275	0.760702	FALSE	FALSE	FALSE	ieu-b-4874	4	149325342	0.000159179	373295	0.760001	bladder cancer	TRUE	NA	NA	NA	NA	NA	NA	NA	4.48e-06	4	149325342	3113	0.03573	TRUE	2	1	TRUE
SSC-A on NK	rs6863338	T	C	T	C	0.2553	2.71e-05	0.084	0.113868	FALSE	FALSE	FALSE	ieu-b-4874	5	127586596	0.000214008	373295	0.9	bladder cancer	TRUE	NA	NA	NA	NA	NA	NA	NA	3.85e-07	5	127586596	3113	0.05018	TRUE	2	1	TRUE
SSC-A on NK	rs74856421	T	C	T	C	0.22	-0.00075656	0.0793	0.075374	FALSE	FALSE	FALSE	ieu-b-4874	16	3773110	0.000262449	373295	0.00389996	bladder cancer	TRUE	NA	NA	NA	NA	NA	NA	NA	7.79e-06	16	3773110	3113	0.04913	TRUE	2	1	TRUE
SSC-A on NK	rs75215140	G	A	G	A	-0.1632	0.000215523	0.168	0.176503	FALSE	FALSE	FALSE	ieu-b-4874	2	62135307	0.000177832	373295	0.23	bladder cancer	TRUE	NA	NA	NA	NA	NA	NA	NA	9.04e-06	2	62135307	3113	0.0367	TRUE	2	1	TRUE
SSC-A on NK	rs7575742	G	A	G	A	0.1383	0.000119086	0.3696	0.668338	FALSE	FALSE	FALSE	ieu-b-4874	2	135429002	0.000143548	373295	0.41	bladder cancer	TRUE	NA	NA	NA	NA	NA	NA	NA	7.57e-07	2	135429002	3113	0.02791	TRUE	2	1	TRUE
SSC-A on NK	rs767896	T	C	T	C	0.1637	-0.000298131	0.2114	0.303075	FALSE	FALSE	FALSE	ieu-b-4874	6	33791515	0.000146998	373295	0.0430002	bladder cancer	TRUE	NA	NA	NA	NA	NA	NA	NA	1.31e-06	6	33791515	3113	0.03376	TRUE	2	1	TRUE
SSC-A on NK	rs77154024	C	T	C	T	1.113	0.000531128	0.0027	0.02183	FALSE	FALSE	FALSE	ieu-b-4874	4	72546264	0.000463577	373295	0.25	bladder cancer	TRUE	NA	NA	NA	NA	NA	NA	NA	4.42e-06	4	72546264	3113	0.242	TRUE	2	1	TRUE
SSC-A on NK	rs79025422	A	G	A	G	0.5466	0.000491232	0.0148	0.042385	FALSE	FALSE	FALSE	ieu-b-4874	5	80236683	0.000342125	373295	0.15	bladder cancer	TRUE	NA	NA	NA	NA	NA	NA	NA	2.06e-06	5	80236683	3113	0.1149	TRUE	2	1	TRUE
SSC-A on NK	rs873220	A	G	A	G	-0.1277	2.43e-05	0.3392	0.375514	FALSE	FALSE	FALSE	ieu-b-4874	21	33382162	0.000139911	373295	0.86	bladder cancer	TRUE	NA	NA	NA	NA	NA	NA	NA	9.57e-06	21	33382162	3113	0.02879	TRUE	2	1	TRUE
SSC-A on NK	rs9912354	T	C	T	C	0.1471	-9.94e-06	0.5254	0.420313	FALSE	FALSE	FALSE	ieu-b-4874	17	33805730	0.000136899	373295	0.94	bladder cancer	TRUE	NA	NA	NA	NA	NA	NA	NA	6.8e-08	17	33805730	3113	0.02719	TRUE	2	1	TRUE
FSC-A on NK	rs1006368	T	C	T	C	0.389	0.000156718	0.1224	0.110615	FALSE	FALSE	FALSE	ieu-b-4874	10	126346603	0.000215676	373295	0.47	bladder cancer	TRUE	NA	NA	NA	NA	NA	NA	NA	5.08e-22	10	126346603	3113	0.04003	TRUE	2	1	TRUE
FSC-A on NK	rs10919543	G	A	G	A	-0.1509	-7.31e-05	0.5475	0.318037	FALSE	FALSE	FALSE	ieu-b-4874	1	161508617	0.000146235	373295	0.62	bladder cancer	TRUE	NA	NA	NA	NA	NA	NA	NA	3.03e-08	1	161508617	3113	0.02717	TRUE	2	1	TRUE
FSC-A on NK	rs111460281	A	G	A	G	0.2794	-0.000234931	0.0524	0.03879	FALSE	FALSE	FALSE	ieu-b-4874	21	46437156	0.000354753	373295	0.51	bladder cancer	TRUE	NA	NA	NA	NA	NA	NA	NA	5.54e-06	21	46437156	3113	0.06138	TRUE	2	1	TRUE
FSC-A on NK	rs117893932	G	A	G	A	0.2818	0.000699066	0.0501	0.024628	FALSE	FALSE	FALSE	ieu-b-4874	18	56570039	0.00043574	373295	0.11	bladder cancer	TRUE	NA	NA	NA	NA	NA	NA	NA	4.84e-06	18	56570039	3113	0.06153	TRUE	2	1	TRUE
FSC-A on NK	rs12425743	G	A	G	A	0.8813	8.5e-05	0.0055	0.09309	FALSE	FALSE	FALSE	ieu-b-4874	12	86546401	0.00023271	373295	0.709999	bladder cancer	TRUE	NA	NA	NA	NA	NA	NA	NA	1.43e-06	12	86546401	3113	0.1825	TRUE	2	1	TRUE
FSC-A on NK	rs12542554	T	C	T	C	0.2057	-0.000180765	0.1031	0.094759	FALSE	FALSE	FALSE	ieu-b-4874	8	5579734	0.000232632	373295	0.44	bladder cancer	TRUE	NA	NA	NA	NA	NA	NA	NA	2.4e-06	8	5579734	3113	0.04354	TRUE	2	1	TRUE
FSC-A on NK	rs145419574	T	C	T	C	1.098	0.000367082	0.0029	0.017521	FALSE	FALSE	FALSE	ieu-b-4874	6	17386586	0.000532406	373295	0.49	bladder cancer	TRUE	NA	NA	NA	NA	NA	NA	NA	4.3e-06	6	17386586	3113	0.2386	TRUE	2	1	TRUE
FSC-A on NK	rs146765347	T	C	T	C	-0.286	-0.000324848	0.0495	0.031921	FALSE	FALSE	FALSE	ieu-b-4874	11	11413255	0.000386869	373295	0.4	bladder cancer	TRUE	NA	NA	NA	NA	NA	NA	NA	5.01e-06	11	11413255	3113	0.06255	TRUE	2	1	TRUE
FSC-A on NK	rs16970975	A	G	A	G	-0.1698	-9.94e-05	0.1659	0.17323	FALSE	FALSE	FALSE	ieu-b-4874	17	33770706	0.000178726	373295	0.58	bladder cancer	TRUE	NA	NA	NA	NA	NA	NA	NA	2.45e-06	17	33770706	3113	0.03597	TRUE	2	1	TRUE
FSC-A on NK	rs1735091	T	C	T	C	-0.1744	-0.00034776	0.8614	0.891506	FALSE	FALSE	FALSE	ieu-b-4874	7	152996005	0.000217816	373295	0.11	bladder cancer	TRUE	NA	NA	NA	NA	NA	NA	NA	4.5e-06	7	152996005	3113	0.03795	TRUE	2	1	TRUE
FSC-A on NK	rs2774933	A	G	A	G	0.1363	-5.38e-05	0.3455	0.469043	FALSE	FALSE	FALSE	ieu-b-4874	1	62637062	0.000137425	373295	0.7	bladder cancer	TRUE	NA	NA	NA	NA	NA	NA	NA	1.3e-06	1	62637062	3113	0.0281	TRUE	2	1	TRUE
FSC-A on NK	rs34700818	T	C	T	C	0.133	0.000186254	0.2584	0.289142	FALSE	FALSE	FALSE	ieu-b-4874	17	48945753	0.000149787	373295	0.21	bladder cancer	TRUE	NA	NA	NA	NA	NA	NA	NA	9.94e-06	17	48945753	3113	0.03006	TRUE	2	1	TRUE
FSC-A on NK	rs55708007	G	C	G	C	0.3112	3.63e-05	0.0448	0.020766	FALSE	TRUE	FALSE	ieu-b-4874	21	46813143	0.000479469	373295	0.94	bladder cancer	TRUE	NA	NA	NA	NA	NA	NA	NA	1.65e-06	21	46813143	3113	0.0648	TRUE	2	1	TRUE
FSC-A on NK	rs5768144	G	A	G	A	-0.1937	5.84e-06	0.1111	0.098717	FALSE	FALSE	FALSE	ieu-b-4874	22	48307233	0.000226824	373295	0.98	bladder cancer	TRUE	NA	NA	NA	NA	NA	NA	NA	5.05e-06	22	48307233	3113	0.04237	TRUE	2	1	TRUE
FSC-A on NK	rs73112545	T	C	T	C	-0.139	-0.00014793	0.2795	0.184938	FALSE	FALSE	FALSE	ieu-b-4874	3	2699329	0.000175352	373295	0.4	bladder cancer	TRUE	NA	NA	NA	NA	NA	NA	NA	2.24e-06	3	2699329	3113	0.02933	TRUE	2	1	TRUE
FSC-A on NK	rs78273995	G	A	G	A	0.1351	-0.00027683	0.2703	0.190716	FALSE	FALSE	FALSE	ieu-b-4874	14	79113570	0.000172258	373295	0.11	bladder cancer	TRUE	NA	NA	NA	NA	NA	NA	NA	8e-06	14	79113570	3113	0.0302	TRUE	2	1	TRUE
FSC-A on NK	rs79678187	C	G	C	G	-0.1634	-0.000210302	0.1918	0.108087	FALSE	TRUE	FALSE	ieu-b-4874	9	91869856	0.000217452	373295	0.33	bladder cancer	TRUE	TRUE	rs79678187	rs76495081	C	G	C	A	1.21e-06	9	91859293	3113	0.0336	TRUE	2	1	TRUE
FSC-A on NK	rs9912354	T	C	T	C	0.1606	-9.94e-06	0.5254	0.420313	FALSE	FALSE	FALSE	ieu-b-4874	17	33805730	0.000136899	373295	0.94	bladder cancer	TRUE	NA	NA	NA	NA	NA	NA	NA	2.34e-09	17	33805730	3113	0.02681	TRUE	2	1	TRUE
CD45RA- CD28- CD8br AC	rs1007033	T	C	T	C	37.39	0.000199817	0.0396	0.059354	FALSE	FALSE	FALSE	ieu-b-4874	17	31695774	0.000286077	373295	0.48	bladder cancer	TRUE	NA	NA	NA	NA	NA	NA	NA	5.59e-08	17	31695774	3408	6.868	TRUE	2	1	TRUE
CD45RA- CD28- CD8br AC	rs10759064	G	A	G	A	-13.2	-0.00012727	0.5346	0.597482	FALSE	FALSE	FALSE	ieu-b-4874	9	9405003	0.000138092	373295	0.36	bladder cancer	TRUE	NA	NA	NA	NA	NA	NA	NA	3.84e-07	9	9405003	3408	2.596	TRUE	2	1	TRUE
CD45RA- CD28- CD8br AC	rs111456999	A	G	A	G	56.51	-0.000178912	0.0113	0.025528	FALSE	FALSE	FALSE	ieu-b-4874	8	3156062	0.000436512	373295	0.68	bladder cancer	TRUE	NA	NA	NA	NA	NA	NA	NA	5.26e-06	8	3156062	3408	12.39	TRUE	2	1	TRUE
CD45RA- CD28- CD8br AC	rs111953852	G	A	G	A	137.6	-0.000265544	0.0025	0.022679	FALSE	FALSE	FALSE	ieu-b-4874	14	84194540	0.000454236	373295	0.56	bladder cancer	TRUE	NA	NA	NA	NA	NA	NA	NA	1.82e-08	14	84194540	3408	24.38	TRUE	2	1	TRUE
CD45RA- CD28- CD8br AC	rs111978771	C	T	C	T	123.8	1.57e-05	0.0043	0.016982	FALSE	FALSE	FALSE	ieu-b-4874	1	21025910	0.000569013	373295	0.98	bladder cancer	TRUE	NA	NA	NA	NA	NA	NA	NA	3.21e-10	1	21025910	3408	19.64	TRUE	2	1	TRUE
CD45RA- CD28- CD8br AC	rs111981818	G	A	G	A	133.9	0.000352696	0.0028	0.010568	FALSE	FALSE	FALSE	ieu-b-4874	4	2899648	0.000668565	373295	0.6	bladder cancer	TRUE	NA	NA	NA	NA	NA	NA	NA	5.41e-08	4	2899648	3408	24.58	TRUE	2	1	TRUE
CD45RA- CD28- CD8br AC	rs112028149	T	C	T	C	105.2	-2.72e-05	0.0035	0.0159	FALSE	FALSE	FALSE	ieu-b-4874	4	60775910	0.000543976	373295	0.96	bladder cancer	TRUE	NA	NA	NA	NA	NA	NA	NA	1.7e-06	4	60775910	3408	21.94	TRUE	2	1	TRUE
CD45RA- CD28- CD8br AC	rs11232730	A	C	A	C	40.36	0.00053519	0.0283	0.120877	FALSE	FALSE	FALSE	ieu-b-4874	11	81281823	0.000207873	373295	0.01	bladder cancer	TRUE	NA	NA	NA	NA	NA	NA	NA	2.2e-07	11	81281823	3408	7.773	TRUE	2	1	TRUE
CD45RA- CD28- CD8br AC	rs112545773	A	G	A	G	278.7	-0.000800389	0.0004	0.021884	FALSE	FALSE	FALSE	ieu-b-4874	3	141081402	0.00048077	373295	0.0959997	bladder cancer	TRUE	NA	NA	NA	NA	NA	NA	NA	9.84e-06	3	141081402	3408	62.95	TRUE	2	1	TRUE
CD45RA- CD28- CD8br AC	rs112568609	T	C	T	C	87.63	0.000875494	0.0076	0.023954	FALSE	FALSE	FALSE	ieu-b-4874	15	27818525	0.000459791	373295	0.0569994	bladder cancer	TRUE	NA	NA	NA	NA	NA	NA	NA	9.6e-09	15	27818525	3408	15.24	TRUE	2	1	TRUE
CD45RA- CD28- CD8br AC	rs112785730	A	G	A	G	115.7	-0.000536471	0.0026	0.016747	FALSE	FALSE	FALSE	ieu-b-4874	2	127831527	0.000550986	373295	0.33	bladder cancer	TRUE	NA	NA	NA	NA	NA	NA	NA	2.32e-06	2	127831527	3408	24.44	TRUE	2	1	TRUE
CD45RA- CD28- CD8br AC	rs113432575	T	C	T	C	345.8	-0.000508055	0.0006	0.010751	FALSE	FALSE	FALSE	ieu-b-4874	21	30128360	0.000691694	373295	0.46	bladder cancer	TRUE	NA	NA	NA	NA	NA	NA	NA	1.48e-09	21	30128360	3408	57.03	TRUE	2	1	TRUE
CD45RA- CD28- CD8br AC	rs113447030	A	G	A	G	68.16	0.000487648	0.0075	0.04461	FALSE	FALSE	FALSE	ieu-b-4874	9	124865332	0.00032813	373295	0.14	bladder cancer	TRUE	NA	NA	NA	NA	NA	NA	NA	7.82e-06	9	124865332	3408	15.23	TRUE	2	1	TRUE
CD45RA- CD28- CD8br AC	rs113819655	T	C	T	C	442.7	0.000111349	0.0004	0.013153	FALSE	FALSE	FALSE	ieu-b-4874	13	100586942	0.000640625	373295	0.86	bladder cancer	TRUE	NA	NA	NA	NA	NA	NA	NA	3.9e-12	13	100586942	3408	63.56	TRUE	2	1	TRUE
CD45RA- CD28- CD8br AC	rs114057146	T	A	T	A	203.6	0.00200032	0.0013	0.015821	FALSE	TRUE	FALSE	ieu-b-4874	3	190504703	0.000604138	373295	0.000929994	bladder cancer	TRUE	NA	NA	NA	NA	NA	NA	NA	8.35e-08	3	190504703	3408	37.91	TRUE	2	1	TRUE
CD45RA- CD28- CD8br AC	rs114109475	A	G	A	G	76.96	0.000665734	0.0075	0.014523	FALSE	FALSE	FALSE	ieu-b-4874	4	47216939	0.00056535	373295	0.24	bladder cancer	TRUE	NA	NA	NA	NA	NA	NA	NA	6.26e-07	4	47216939	3408	15.41	TRUE	2	1	TRUE
CD45RA- CD28- CD8br AC	rs114128029	T	C	T	C	116.9	0.000423618	0.0025	0.012746	FALSE	FALSE	FALSE	ieu-b-4874	5	79070021	0.000624734	373295	0.5	bladder cancer	TRUE	NA	NA	NA	NA	NA	NA	NA	7.84e-06	5	79070021	3408	26.12	TRUE	2	1	TRUE
CD45RA- CD28- CD8br AC	rs114216104	T	C	T	C	591	0.000203999	0.0001	0.016067	FALSE	FALSE	FALSE	ieu-b-4874	5	140131486	0.00055111	373295	0.709999	bladder cancer	TRUE	NA	NA	NA	NA	NA	NA	NA	1.16e-09	5	140131486	3408	96.85	TRUE	2	1	TRUE
CD45RA- CD28- CD8br AC	rs114507999	A	G	A	G	176.7	-6.52e-05	0.0022	0.0187	FALSE	FALSE	FALSE	ieu-b-4874	1	21892266	0.000498453	373295	0.9	bladder cancer	TRUE	NA	NA	NA	NA	NA	NA	NA	1.92e-09	1	21892266	3408	29.35	TRUE	2	1	TRUE
CD45RA- CD28- CD8br AC	rs114619811	G	A	G	A	240.1	-0.000188808	0.0006	0.011512	FALSE	FALSE	FALSE	ieu-b-4874	4	71875684	0.00064743	373295	0.77	bladder cancer	TRUE	NA	NA	NA	NA	NA	NA	NA	2.52e-06	4	71875684	3408	50.93	TRUE	2	1	TRUE
CD45RA- CD28- CD8br AC	rs114801643	A	C	A	C	436	0.000418645	0.0003	0.023146	FALSE	FALSE	FALSE	ieu-b-4874	6	66316172	0.000464764	373295	0.37	bladder cancer	TRUE	NA	NA	NA	NA	NA	NA	NA	6.72e-09	6	66316172	3408	75.02	TRUE	2	1	TRUE
CD45RA- CD28- CD8br AC	rs115379408	A	G	A	G	450.6	8.44e-05	0.0003	0.012064	FALSE	FALSE	FALSE	ieu-b-4874	6	18617129	0.000619371	373295	0.89	bladder cancer	TRUE	NA	NA	NA	NA	NA	NA	NA	7.79e-09	6	18617129	3408	77.86	TRUE	2	1	TRUE
CD45RA- CD28- CD8br AC	rs115445664	G	A	G	A	349.4	0.00016095	0.0003	0.013432	FALSE	FALSE	FALSE	ieu-b-4874	3	126486072	0.000623733	373295	0.8	bladder cancer	TRUE	NA	NA	NA	NA	NA	NA	NA	7.87e-07	3	126486072	3408	70.62	TRUE	2	1	TRUE
CD45RA- CD28- CD8br AC	rs115485721	A	T	A	T	69.53	0.000668033	0.0139	0.059559	FALSE	TRUE	FALSE	ieu-b-4874	6	65783601	0.000291936	373295	0.0219999	bladder cancer	TRUE	NA	NA	NA	NA	NA	NA	NA	1.87e-09	6	65783601	3408	11.54	TRUE	2	1	TRUE
CD45RA- CD28- CD8br AC	rs115486816	A	G	A	G	127.9	6.4e-06	0.0023	0.013409	FALSE	FALSE	FALSE	ieu-b-4874	1	56588047	0.000610343	373295	0.99	bladder cancer	TRUE	NA	NA	NA	NA	NA	NA	NA	1.04e-06	1	56588047	3408	26.15	TRUE	2	1	TRUE
CD45RA- CD28- CD8br AC	rs115879183	G	A	G	A	281.9	-5.9e-05	0.0009	0.011101	FALSE	FALSE	FALSE	ieu-b-4874	3	194347376	0.000818341	373295	0.94	bladder cancer	TRUE	NA	NA	NA	NA	NA	NA	NA	5.1e-10	3	194347376	3408	45.23	TRUE	2	1	TRUE
CD45RA- CD28- CD8br AC	rs115928015	C	G	C	G	318.1	0.000276252	0.0004	0.010167	FALSE	TRUE	FALSE	ieu-b-4874	4	156055689	0.00069723	373295	0.69	bladder cancer	TRUE	NA	NA	NA	NA	NA	NA	NA	3.51e-07	4	156055689	3408	62.32	TRUE	2	1	TRUE
CD45RA- CD28- CD8br AC	rs115945428	A	G	A	G	61.26	0.000554655	0.0092	0.02219	FALSE	FALSE	FALSE	ieu-b-4874	3	110093567	0.000459041	373295	0.23	bladder cancer	TRUE	NA	NA	NA	NA	NA	NA	NA	9.91e-06	3	110093567	3408	13.84	TRUE	2	1	TRUE
CD45RA- CD28- CD8br AC	rs115954619	A	G	A	G	213	0.000227936	0.0015	0.012104	FALSE	FALSE	FALSE	ieu-b-4874	2	174896997	0.000645482	373295	0.719999	bladder cancer	TRUE	NA	NA	NA	NA	NA	NA	NA	7.23e-09	2	174896997	3408	36.73	TRUE	2	1	TRUE
CD45RA- CD28- CD8br AC	rs116581718	C	T	C	T	384.3	9.51e-05	0.0006	0.020757	FALSE	FALSE	FALSE	ieu-b-4874	5	29413612	0.000486042	373295	0.84	bladder cancer	TRUE	NA	NA	NA	NA	NA	NA	NA	4.14e-11	5	29413612	3408	58.05	TRUE	2	1	TRUE
CD45RA- CD28- CD8br AC	rs116779558	G	T	G	T	248.4	-0.000363947	0.0007	0.030133	FALSE	FALSE	FALSE	ieu-b-4874	3	77069014	0.00039436	373295	0.36	bladder cancer	TRUE	NA	NA	NA	NA	NA	NA	NA	1.44e-07	3	77069014	3408	47.12	TRUE	2	1	TRUE
CD45RA- CD28- CD8br AC	rs116807650	T	C	T	C	276.6	0.000734206	0.0007	0.012557	FALSE	FALSE	FALSE	ieu-b-4874	4	112605741	0.000627642	373295	0.24	bladder cancer	TRUE	NA	NA	NA	NA	NA	NA	NA	9.2e-08	4	112605741	3408	51.66	TRUE	2	1	TRUE
CD45RA- CD28- CD8br AC	rs116848911	A	G	A	G	110	-0.000181775	0.0029	0.016897	FALSE	FALSE	FALSE	ieu-b-4874	14	79042294	0.000527559	373295	0.73	bladder cancer	TRUE	NA	NA	NA	NA	NA	NA	NA	1.09e-06	14	79042294	3408	22.52	TRUE	2	1	TRUE
CD45RA- CD28- CD8br AC	rs116876186	C	T	C	T	647.9	0.000284866	0.0001	0.010273	FALSE	FALSE	FALSE	ieu-b-4874	17	16446446	0.000675012	373295	0.67	bladder cancer	TRUE	NA	NA	NA	NA	NA	NA	NA	6.57e-11	17	16446446	3408	98.9	TRUE	2	1	TRUE
CD45RA- CD28- CD8br AC	rs116941636	A	G	A	G	210.2	-0.000181962	0.0019	0.010584	FALSE	FALSE	FALSE	ieu-b-4874	16	79757046	0.000660843	373295	0.780001	bladder cancer	TRUE	NA	NA	NA	NA	NA	NA	NA	3.44e-12	16	79757046	3408	30.1	TRUE	2	1	TRUE
CD45RA- CD28- CD8br AC	rs116959045	G	T	G	T	172.7	-0.000394605	0.0022	0.010641	FALSE	FALSE	FALSE	ieu-b-4874	8	53929771	0.000659679	373295	0.55	bladder cancer	TRUE	NA	NA	NA	NA	NA	NA	NA	1.12e-09	8	53929771	3408	28.26	TRUE	2	1	TRUE
CD45RA- CD28- CD8br AC	rs117036387	G	A	G	A	84.27	0.000616826	0.0075	0.023336	FALSE	FALSE	FALSE	ieu-b-4874	20	3521072	0.00045599	373295	0.18	bladder cancer	TRUE	NA	NA	NA	NA	NA	NA	NA	4.04e-08	20	3521072	3408	15.32	TRUE	2	1	TRUE
CD45RA- CD28- CD8br AC	rs11716645	G	A	G	A	159.7	-0.000287842	0.0025	0.027355	FALSE	FALSE	FALSE	ieu-b-4874	3	29402908	0.00041674	373295	0.49	bladder cancer	TRUE	NA	NA	NA	NA	NA	NA	NA	2.42e-09	3	29402908	3408	26.69	TRUE	2	1	TRUE
CD45RA- CD28- CD8br AC	rs117196114	A	G	A	G	201.5	-5.12e-05	0.0018	0.045688	FALSE	FALSE	FALSE	ieu-b-4874	9	83853182	0.000326287	373295	0.88	bladder cancer	TRUE	NA	NA	NA	NA	NA	NA	NA	4.11e-10	9	83853182	3408	32.14	TRUE	2	1	TRUE
CD45RA- CD28- CD8br AC	rs117271894	A	G	A	G	192.8	-0.000565144	0.0022	0.020987	FALSE	FALSE	FALSE	ieu-b-4874	8	112881674	0.000471719	373295	0.23	bladder cancer	TRUE	NA	NA	NA	NA	NA	NA	NA	1.63e-08	8	112881674	3408	34.06	TRUE	2	1	TRUE
CD45RA- CD28- CD8br AC	rs117277690	G	A	G	A	356.8	0.000440271	0.0004	0.016348	FALSE	FALSE	FALSE	ieu-b-4874	11	33322159	0.000566726	373295	0.44	bladder cancer	TRUE	NA	NA	NA	NA	NA	NA	NA	6.19e-08	11	33322159	3408	65.76	TRUE	2	1	TRUE
CD45RA- CD28- CD8br AC	rs117413806	C	T	C	T	364.8	2.28e-06	0.0004	0.023246	FALSE	FALSE	FALSE	ieu-b-4874	11	16290338	0.00047283	373295	1	bladder cancer	TRUE	NA	NA	NA	NA	NA	NA	NA	3.57e-08	11	16290338	3408	66.04	TRUE	2	1	TRUE
CD45RA- CD28- CD8br AC	rs117428784	A	C	A	C	472.2	-0.000590638	0.0004	0.017985	FALSE	FALSE	FALSE	ieu-b-4874	19	43422957	0.000533137	373295	0.27	bladder cancer	TRUE	NA	NA	NA	NA	NA	NA	NA	2.03e-11	19	43422957	3408	70.2	TRUE	2	1	TRUE
CD45RA- CD28- CD8br AC	rs117431224	G	A	G	A	385.7	-0.000329242	0.0004	0.010819	FALSE	FALSE	FALSE	ieu-b-4874	11	44356396	0.00066158	373295	0.62	bladder cancer	TRUE	NA	NA	NA	NA	NA	NA	NA	2.31e-08	11	44356396	3408	68.87	TRUE	2	1	TRUE
CD45RA- CD28- CD8br AC	rs117437702	G	A	G	A	46.12	-0.00030073	0.0185	0.038464	FALSE	FALSE	FALSE	ieu-b-4874	10	110752679	0.00036075	373295	0.4	bladder cancer	TRUE	NA	NA	NA	NA	NA	NA	NA	2.61e-06	10	110752679	3408	9.799	TRUE	2	1	TRUE
CD45RA- CD28- CD8br AC	rs117469911	A	C	A	C	132.8	8.62e-05	0.0035	0.014369	FALSE	FALSE	FALSE	ieu-b-4874	7	79791344	0.000591999	373295	0.88	bladder cancer	TRUE	NA	NA	NA	NA	NA	NA	NA	1.24e-10	7	79791344	3408	20.58	TRUE	2	1	TRUE
CD45RA- CD28- CD8br AC	rs117475878	T	C	T	C	159.2	6.07e-06	0.0022	0.01324	FALSE	FALSE	FALSE	ieu-b-4874	14	32709998	0.000627419	373295	0.99	bladder cancer	TRUE	NA	NA	NA	NA	NA	NA	NA	1.09e-07	14	32709998	3408	29.91	TRUE	2	1	TRUE
CD45RA- CD28- CD8br AC	rs117500319	A	G	A	G	230.6	-0.00078978	0.0007	0.018836	FALSE	FALSE	FALSE	ieu-b-4874	16	3108127	0.00050807	373295	0.12	bladder cancer	TRUE	NA	NA	NA	NA	NA	NA	NA	2.09e-06	16	3108127	3408	48.53	TRUE	2	1	TRUE
CD45RA- CD28- CD8br AC	rs117514047	C	A	C	A	462.3	-0.000206339	0.0003	0.015391	FALSE	FALSE	FALSE	ieu-b-4874	21	26316207	0.000561399	373295	0.709999	bladder cancer	TRUE	NA	NA	NA	NA	NA	NA	NA	2.71e-08	21	26316207	3408	82.97	TRUE	2	1	TRUE
CD45RA- CD28- CD8br AC	rs117708200	G	A	G	A	284.3	0.00134175	0.0009	0.010839	FALSE	FALSE	FALSE	ieu-b-4874	1	121273212	0.000673507	373295	0.0460002	bladder cancer	TRUE	NA	NA	NA	NA	NA	NA	NA	6.56e-08	1	121273212	3408	52.5	TRUE	2	1	TRUE
CD45RA- CD28- CD8br AC	rs117785622	T	G	T	G	232.5	-0.000831703	0.001	0.012885	FALSE	FALSE	FALSE	ieu-b-4874	12	132283582	0.00059858	373295	0.16	bladder cancer	TRUE	NA	NA	NA	NA	NA	NA	NA	3.63e-08	12	132283582	3408	42.11	TRUE	2	1	TRUE
CD45RA- CD28- CD8br AC	rs117845490	C	T	C	T	152.1	-5.86e-05	0.0022	0.029735	FALSE	FALSE	FALSE	ieu-b-4874	7	113248370	0.000400031	373295	0.88	bladder cancer	TRUE	NA	NA	NA	NA	NA	NA	NA	4.58e-07	7	113248370	3408	30.1	TRUE	2	1	TRUE
CD45RA- CD28- CD8br AC	rs117863142	A	G	A	G	117.3	0.000373973	0.0035	0.023082	FALSE	FALSE	FALSE	ieu-b-4874	16	79245986	0.000451645	373295	0.41	bladder cancer	TRUE	NA	NA	NA	NA	NA	NA	NA	1.25e-07	16	79245986	3408	22.14	TRUE	2	1	TRUE
CD45RA- CD28- CD8br AC	rs117905416	G	C	G	C	272.3	-0.000341589	0.0004	0.010815	FALSE	TRUE	FALSE	ieu-b-4874	4	48119663	0.00065057	373295	0.6	bladder cancer	TRUE	NA	NA	NA	NA	NA	NA	NA	7.03e-06	4	48119663	3408	60.5	TRUE	2	1	TRUE
CD45RA- CD28- CD8br AC	rs117975109	T	G	T	G	308.9	0.000369477	0.0006	0.010652	FALSE	FALSE	FALSE	ieu-b-4874	12	52408142	0.000679032	373295	0.59	bladder cancer	TRUE	NA	NA	NA	NA	NA	NA	NA	4.82e-07	12	52408142	3408	61.24	TRUE	2	1	TRUE
CD45RA- CD28- CD8br AC	rs118024980	C	T	C	T	50.48	7.47e-05	0.0156	0.010236	FALSE	FALSE	FALSE	ieu-b-4874	9	9009338	0.000696939	373295	0.91	bladder cancer	TRUE	NA	NA	NA	NA	NA	NA	NA	3.38e-06	9	9009338	3408	10.85	TRUE	2	1	TRUE
CD45RA- CD28- CD8br AC	rs118082680	C	T	C	T	217	-0.000167644	0.001	0.014771	FALSE	FALSE	FALSE	ieu-b-4874	8	21084293	0.000560957	373295	0.77	bladder cancer	TRUE	NA	NA	NA	NA	NA	NA	NA	4.34e-07	8	21084293	3408	42.86	TRUE	2	1	TRUE
CD45RA- CD28- CD8br AC	rs11899522	T	C	T	C	35.09	-0.000173479	0.0398	0.028006	FALSE	FALSE	FALSE	ieu-b-4874	2	54396879	0.000415616	373295	0.68	bladder cancer	TRUE	NA	NA	NA	NA	NA	NA	NA	3.46e-07	2	54396879	3408	6.871	TRUE	2	1	TRUE
CD45RA- CD28- CD8br AC	rs12279408	T	C	T	C	259.3	0.00153197	0.0007	0.011183	FALSE	FALSE	FALSE	ieu-b-4874	11	84269972	0.000658368	373295	0.02	bladder cancer	TRUE	NA	NA	NA	NA	NA	NA	NA	4.7e-07	11	84269972	3408	51.36	TRUE	2	1	TRUE
CD45RA- CD28- CD8br AC	rs12464465	A	G	A	G	189.7	0.000196356	0.0015	0.02381	FALSE	FALSE	FALSE	ieu-b-4874	2	176542288	0.000444171	373295	0.66	bladder cancer	TRUE	NA	NA	NA	NA	NA	NA	NA	4.09e-08	2	176542288	3408	34.49	TRUE	2	1	TRUE
CD45RA- CD28- CD8br AC	rs12656604	A	C	A	C	101.8	0.000198861	0.0047	0.021756	FALSE	FALSE	FALSE	ieu-b-4874	5	72679056	0.000463631	373295	0.67	bladder cancer	TRUE	NA	NA	NA	NA	NA	NA	NA	1.19e-07	5	72679056	3408	19.19	TRUE	2	1	TRUE
CD45RA- CD28- CD8br AC	rs12882035	C	T	C	T	267	-0.000334008	0.0004	0.014813	FALSE	FALSE	FALSE	ieu-b-4874	14	43977463	0.00057741	373295	0.56	bladder cancer	TRUE	NA	NA	NA	NA	NA	NA	NA	5.46e-06	14	43977463	3408	58.64	TRUE	2	1	TRUE
CD45RA- CD28- CD8br AC	rs130071	A	G	A	G	22.81	-0.000144014	0.2188	0.297238	FALSE	FALSE	FALSE	ieu-b-4874	6	31116210	0.000147913	373295	0.33	bladder cancer	TRUE	NA	NA	NA	NA	NA	NA	NA	1.74e-10	6	31116210	3408	3.563	TRUE	2	1	TRUE
CD45RA- CD28- CD8br AC	rs137942933	T	G	T	G	304	0.00060977	0.0006	0.037325	FALSE	FALSE	FALSE	ieu-b-4874	20	33104122	0.000459595	373295	0.18	bladder cancer	TRUE	NA	NA	NA	NA	NA	NA	NA	5.06e-08	20	33104122	3408	55.65	TRUE	2	1	TRUE
CD45RA- CD28- CD8br AC	rs137978465	A	G	A	G	641.1	2.08e-05	0.0004	0.018734	FALSE	FALSE	FALSE	ieu-b-4874	2	228411157	0.000506905	373295	0.97	bladder cancer	TRUE	NA	NA	NA	NA	NA	NA	NA	2.24e-21	2	228411157	3408	67.08	TRUE	2	1	TRUE
CD45RA- CD28- CD8br AC	rs138010330	T	C	T	C	111	0.000668396	0.0048	0.019988	FALSE	FALSE	FALSE	ieu-b-4874	1	161526187	0.000506761	373295	0.19	bladder cancer	TRUE	NA	NA	NA	NA	NA	NA	NA	1.89e-08	1	161526187	3408	19.7	TRUE	2	1	TRUE
CD45RA- CD28- CD8br AC	rs138324315	A	G	A	G	138.5	-0.000327414	0.0028	0.013077	FALSE	FALSE	FALSE	ieu-b-4874	5	39721163	0.000603941	373295	0.59	bladder cancer	TRUE	NA	NA	NA	NA	NA	NA	NA	4.11e-06	5	39721163	3408	30.03	TRUE	2	1	TRUE
CD45RA- CD28- CD8br AC	rs138358136	T	A	T	A	726.8	0.000130947	0.0003	0.025929	FALSE	TRUE	FALSE	ieu-b-4874	7	194075	0.000444007	373295	0.77	bladder cancer	TRUE	NA	NA	NA	NA	NA	NA	NA	1.26e-18	7	194075	3408	82.02	TRUE	2	1	TRUE
CD45RA- CD28- CD8br AC	rs138615640	G	A	G	A	67.16	0.000111103	0.0079	0.012332	FALSE	FALSE	FALSE	ieu-b-4874	4	46871059	0.000629362	373295	0.86	bladder cancer	TRUE	NA	NA	NA	NA	NA	NA	NA	6.46e-06	4	46871059	3408	14.87	TRUE	2	1	TRUE
CD45RA- CD28- CD8br AC	rs138799468	T	C	T	C	791.9	0.000220841	0.0001	0.012974	FALSE	FALSE	FALSE	ieu-b-4874	2	9441279	0.000616532	373295	0.719999	bladder cancer	TRUE	NA	NA	NA	NA	NA	NA	NA	1.17e-15	2	9441279	3408	98.43	TRUE	2	1	TRUE
CD45RA- CD28- CD8br AC	rs138962348	C	T	C	T	259.1	5.02e-05	0.0007	0.01959	FALSE	FALSE	FALSE	ieu-b-4874	2	146534594	0.000509422	373295	0.92	bladder cancer	TRUE	NA	NA	NA	NA	NA	NA	NA	9.7e-09	2	146534594	3408	45.06	TRUE	2	1	TRUE
CD45RA- CD28- CD8br AC	rs139243374	A	G	A	G	221.6	0.000247328	0.0009	0.046554	FALSE	FALSE	FALSE	ieu-b-4874	12	21581956	0.000330881	373295	0.450001	bladder cancer	TRUE	NA	NA	NA	NA	NA	NA	NA	2.26e-07	12	21581956	3408	42.71	TRUE	2	1	TRUE
CD45RA- CD28- CD8br AC	rs139457426	T	C	T	C	71.36	-4.89e-05	0.0147	0.016072	FALSE	FALSE	FALSE	ieu-b-4874	12	47679643	0.000557279	373295	0.93	bladder cancer	TRUE	NA	NA	NA	NA	NA	NA	NA	9.24e-11	12	47679643	3408	10.98	TRUE	2	1	TRUE
CD45RA- CD28- CD8br AC	rs139513469	A	G	A	G	295.5	0.000218667	0.0006	0.024714	FALSE	FALSE	FALSE	ieu-b-4874	10	66332109	0.000452616	373295	0.630001	bladder cancer	TRUE	NA	NA	NA	NA	NA	NA	NA	3.38e-06	10	66332109	3408	63.49	TRUE	2	1	TRUE
CD45RA- CD28- CD8br AC	rs139613266	G	C	G	C	242.6	-0.000567505	0.0006	0.013814	FALSE	TRUE	FALSE	ieu-b-4874	6	101930392	0.00060709	373295	0.35	bladder cancer	TRUE	NA	NA	NA	NA	NA	NA	NA	1.01e-06	6	101930392	3408	49.52	TRUE	2	1	TRUE
CD45RA- CD28- CD8br AC	rs139889394	C	T	C	T	378	-0.000106836	0.0003	0.020798	FALSE	FALSE	FALSE	ieu-b-4874	1	41963906	0.00050471	373295	0.83	bladder cancer	TRUE	NA	NA	NA	NA	NA	NA	NA	1.09e-06	1	41963906	3408	77.39	TRUE	2	1	TRUE
CD45RA- CD28- CD8br AC	rs140112233	C	G	C	G	887.7	0.000174696	0.0001	0.013077	FALSE	TRUE	FALSE	ieu-b-4874	7	115835641	0.000602371	373295	0.77	bladder cancer	TRUE	NA	NA	NA	NA	NA	NA	NA	1.33e-09	7	115835641	3408	146	TRUE	2	1	TRUE
CD45RA- CD28- CD8br AC	rs140134394	C	T	C	T	151.8	-0.000231613	0.0028	0.01371	FALSE	FALSE	FALSE	ieu-b-4874	16	17341866	0.00059457	373295	0.7	bladder cancer	TRUE	NA	NA	NA	NA	NA	NA	NA	9.76e-10	16	17341866	3408	24.76	TRUE	2	1	TRUE
CD45RA- CD28- CD8br AC	rs140280232	T	C	T	C	174.4	-0.000281382	0.0013	0.013427	FALSE	FALSE	FALSE	ieu-b-4874	21	46387655	0.000602275	373295	0.64	bladder cancer	TRUE	NA	NA	NA	NA	NA	NA	NA	5.2e-07	21	46387655	3408	34.67	TRUE	2	1	TRUE
CD45RA- CD28- CD8br AC	rs140311178	T	C	T	C	142.3	0.000139134	0.0037	0.049405	FALSE	FALSE	FALSE	ieu-b-4874	4	8174723	0.000325173	373295	0.67	bladder cancer	TRUE	NA	NA	NA	NA	NA	NA	NA	2.87e-10	4	8174723	3408	22.5	TRUE	2	1	TRUE
CD45RA- CD28- CD8br AC	rs140517857	A	G	A	G	179.1	0.00117459	0.0016	0.012376	FALSE	FALSE	FALSE	ieu-b-4874	3	70804684	0.000636471	373295	0.0649995	bladder cancer	TRUE	NA	NA	NA	NA	NA	NA	NA	9.26e-07	3	70804684	3408	36.43	TRUE	2	1	TRUE
CD45RA- CD28- CD8br AC	rs140590797	G	A	G	A	240	-0.000302638	0.0006	0.010706	FALSE	FALSE	FALSE	ieu-b-4874	14	62568446	0.000676004	373295	0.649999	bladder cancer	TRUE	NA	NA	NA	NA	NA	NA	NA	5.22e-06	14	62568446	3408	52.59	TRUE	2	1	TRUE
CD45RA- CD28- CD8br AC	rs140677128	T	C	T	C	180.6	2.63e-05	0.0012	0.014489	FALSE	FALSE	FALSE	ieu-b-4874	1	229822729	0.000595516	373295	0.96	bladder cancer	TRUE	NA	NA	NA	NA	NA	NA	NA	4.54e-06	1	229822729	3408	39.33	TRUE	2	1	TRUE
CD45RA- CD28- CD8br AC	rs140871773	G	A	G	A	201.6	0.000771152	0.0012	0.016044	FALSE	FALSE	FALSE	ieu-b-4874	17	13877125	0.000607083	373295	0.2	bladder cancer	TRUE	NA	NA	NA	NA	NA	NA	NA	1.95e-06	17	13877125	3408	42.28	TRUE	2	1	TRUE
CD45RA- CD28- CD8br AC	rs141018536	T	C	T	C	30.3	-0.000600742	0.0373	0.014581	FALSE	FALSE	FALSE	ieu-b-4874	13	90525482	0.000571237	373295	0.29	bladder cancer	TRUE	NA	NA	NA	NA	NA	NA	NA	9.07e-06	13	90525482	3408	6.817	TRUE	2	1	TRUE
CD45RA- CD28- CD8br AC	rs141023610	A	G	A	G	556.4	0.000975321	0.0004	0.010722	FALSE	FALSE	FALSE	ieu-b-4874	3	15790899	0.000688442	373295	0.16	bladder cancer	TRUE	NA	NA	NA	NA	NA	NA	NA	4.51e-11	3	15790899	3408	84.21	TRUE	2	1	TRUE
CD45RA- CD28- CD8br AC	rs141057204	G	A	G	A	284.3	0.001008	0.0009	0.015229	FALSE	FALSE	FALSE	ieu-b-4874	11	130013797	0.000608616	373295	0.0980009	bladder cancer	TRUE	NA	NA	NA	NA	NA	NA	NA	3.08e-06	11	130013797	3408	60.84	TRUE	2	1	TRUE
CD45RA- CD28- CD8br AC	rs141289216	T	A	T	A	88.02	0.000110935	0.0051	0.014078	FALSE	TRUE	FALSE	ieu-b-4874	1	14539144	0.000601106	373295	0.85	bladder cancer	TRUE	NA	NA	NA	NA	NA	NA	NA	2.91e-06	1	14539144	3408	18.79	TRUE	2	1	TRUE
CD45RA- CD28- CD8br AC	rs141515499	T	C	T	C	197.4	-0.000592778	0.001	0.010606	FALSE	FALSE	FALSE	ieu-b-4874	8	57100983	0.000687076	373295	0.39	bladder cancer	TRUE	NA	NA	NA	NA	NA	NA	NA	5.37e-07	8	57100983	3408	39.3	TRUE	2	1	TRUE
CD45RA- CD28- CD8br AC	rs141926147	C	A	C	A	50.22	0.000115865	0.0147	0.014899	FALSE	FALSE	FALSE	ieu-b-4874	6	146863903	0.000595268	373295	0.85	bladder cancer	TRUE	NA	NA	NA	NA	NA	NA	NA	3.96e-06	6	146863903	3408	10.87	TRUE	2	1	TRUE
CD45RA- CD28- CD8br AC	rs142115354	T	C	T	C	60.86	0.000177895	0.0089	0.021003	FALSE	FALSE	FALSE	ieu-b-4874	3	42897614	0.000478139	373295	0.709999	bladder cancer	TRUE	NA	NA	NA	NA	NA	NA	NA	6.89e-06	3	42897614	3408	13.51	TRUE	2	1	TRUE
CD45RA- CD28- CD8br AC	rs142419740	T	C	T	C	557.7	0.000704877	0.0003	0.010633	FALSE	FALSE	FALSE	ieu-b-4874	21	47472186	0.000703578	373295	0.32	bladder cancer	TRUE	NA	NA	NA	NA	NA	NA	NA	6.61e-08	21	47472186	3408	103	TRUE	2	1	TRUE
CD45RA- CD28- CD8br AC	rs142470414	T	C	T	C	259.6	0.000801222	0.0009	0.017691	FALSE	FALSE	FALSE	ieu-b-4874	13	73498369	0.000521478	373295	0.12	bladder cancer	TRUE	NA	NA	NA	NA	NA	NA	NA	2.11e-09	13	73498369	3408	43.23	TRUE	2	1	TRUE
CD45RA- CD28- CD8br AC	rs142522853	T	C	T	C	595.1	-1.05e-05	0.0003	0.023923	FALSE	FALSE	FALSE	ieu-b-4874	7	1084031	0.000450431	373295	0.98	bladder cancer	TRUE	NA	NA	NA	NA	NA	NA	NA	1.22e-16	7	1084031	3408	71.5	TRUE	2	1	TRUE
CD45RA- CD28- CD8br AC	rs142611712	G	A	G	A	165.1	0.000865452	0.0013	0.017576	FALSE	FALSE	FALSE	ieu-b-4874	12	54827947	0.000520417	373295	0.0959997	bladder cancer	TRUE	NA	NA	NA	NA	NA	NA	NA	5.05e-06	12	54827947	3408	36.13	TRUE	2	1	TRUE
CD45RA- CD28- CD8br AC	rs142857708	C	T	C	T	269.9	6.8e-05	0.0009	0.013087	FALSE	FALSE	FALSE	ieu-b-4874	4	133864790	0.000633439	373295	0.91	bladder cancer	TRUE	NA	NA	NA	NA	NA	NA	NA	3.33e-06	4	133864790	3408	57.94	TRUE	2	1	TRUE
CD45RA- CD28- CD8br AC	rs143237141	A	G	A	G	32.04	-0.000294623	0.0367	0.02462	FALSE	FALSE	FALSE	ieu-b-4874	22	45176439	0.000456956	373295	0.52	bladder cancer	TRUE	NA	NA	NA	NA	NA	NA	NA	6.55e-06	22	45176439	3408	7.097	TRUE	2	1	TRUE
CD45RA- CD28- CD8br AC	rs143825022	T	C	T	C	251.2	-0.000728595	0.001	0.020485	FALSE	FALSE	FALSE	ieu-b-4874	8	28561116	0.000505192	373295	0.15	bladder cancer	TRUE	NA	NA	NA	NA	NA	NA	NA	1.15e-09	8	28561116	3408	41.16	TRUE	2	1	TRUE
CD45RA- CD28- CD8br AC	rs143930177	A	G	A	G	80	4.51e-05	0.0072	0.043558	FALSE	FALSE	FALSE	ieu-b-4874	10	70543706	0.000331558	373295	0.89	bladder cancer	TRUE	NA	NA	NA	NA	NA	NA	NA	5.26e-07	10	70543706	3408	15.92	TRUE	2	1	TRUE
CD45RA- CD28- CD8br AC	rs143986791	A	G	A	G	30.71	0.000642314	0.0469	0.012445	FALSE	FALSE	FALSE	ieu-b-4874	7	62268900	0.000653037	373295	0.33	bladder cancer	TRUE	NA	NA	NA	NA	NA	NA	NA	7.78e-06	7	62268900	3408	6.857	TRUE	2	1	TRUE
CD45RA- CD28- CD8br AC	rs144431284	T	C	T	C	204.7	-0.0012244	0.0012	0.012434	FALSE	FALSE	FALSE	ieu-b-4874	10	30823850	0.000649887	373295	0.0599998	bladder cancer	TRUE	NA	NA	NA	NA	NA	NA	NA	6.91e-06	10	30823850	3408	45.46	TRUE	2	1	TRUE
CD45RA- CD28- CD8br AC	rs144571871	G	A	G	A	725.9	0.000321475	0.0001	0.013563	FALSE	FALSE	FALSE	ieu-b-4874	1	65133062	0.000659215	373295	0.630001	bladder cancer	TRUE	NA	NA	NA	NA	NA	NA	NA	6.76e-13	1	65133062	3408	100.6	TRUE	2	1	TRUE
CD45RA- CD28- CD8br AC	rs144599349	T	C	T	C	87.78	-0.00061674	0.0051	0.011695	FALSE	FALSE	FALSE	ieu-b-4874	22	45887357	0.000674826	373295	0.36	bladder cancer	TRUE	NA	NA	NA	NA	NA	NA	NA	3.06e-06	22	45887357	3408	18.78	TRUE	2	1	TRUE
CD45RA- CD28- CD8br AC	rs144711723	T	C	T	C	429	0.000689436	0.0003	0.009832	FALSE	FALSE	FALSE	ieu-b-4874	2	145836600	0.000717818	373295	0.34	bladder cancer	TRUE	NA	NA	NA	NA	NA	NA	NA	1.06e-08	2	145836600	3408	74.81	TRUE	2	1	TRUE
CD45RA- CD28- CD8br AC	rs144920942	T	C	T	C	151.3	0.00112197	0.0016	0.01826	FALSE	FALSE	FALSE	ieu-b-4874	6	104569120	0.000507154	373295	0.0269998	bladder cancer	TRUE	NA	NA	NA	NA	NA	NA	NA	4.58e-06	6	104569120	3408	32.96	TRUE	2	1	TRUE
CD45RA- CD28- CD8br AC	rs145022527	T	G	T	G	162.1	0.000128116	0.0013	0.024279	FALSE	FALSE	FALSE	ieu-b-4874	13	37118716	0.000440552	373295	0.77	bladder cancer	TRUE	NA	NA	NA	NA	NA	NA	NA	2.09e-06	13	37118716	3408	34.1	TRUE	2	1	TRUE
CD45RA- CD28- CD8br AC	rs145174666	A	G	A	G	52.78	0.000418166	0.0129	0.02377	FALSE	FALSE	FALSE	ieu-b-4874	6	6745192	0.000456263	373295	0.36	bladder cancer	TRUE	NA	NA	NA	NA	NA	NA	NA	4.04e-06	6	6745192	3408	11.43	TRUE	2	1	TRUE
CD45RA- CD28- CD8br AC	rs145266404	C	G	C	G	240	-0.000255118	0.0007	0.016053	FALSE	TRUE	FALSE	ieu-b-4874	5	172300229	0.000540779	373295	0.64	bladder cancer	TRUE	NA	NA	NA	NA	NA	NA	NA	6.85e-07	5	172300229	3408	48.24	TRUE	2	1	TRUE
CD45RA- CD28- CD8br AC	rs145336406	T	C	T	C	148.2	0.000492909	0.0026	0.016367	FALSE	FALSE	FALSE	ieu-b-4874	6	78745175	0.000551032	373295	0.37	bladder cancer	TRUE	NA	NA	NA	NA	NA	NA	NA	4.22e-09	6	78745175	3408	25.16	TRUE	2	1	TRUE
CD45RA- CD28- CD8br AC	rs145744161	T	C	T	C	32.56	-0.00079346	0.0439	0.017213	FALSE	FALSE	FALSE	ieu-b-4874	10	108259029	0.000537757	373295	0.14	bladder cancer	TRUE	NA	NA	NA	NA	NA	NA	NA	6.13e-07	10	108259029	3408	6.516	TRUE	2	1	TRUE
CD45RA- CD28- CD8br AC	rs145957749	A	C	A	C	116.2	-0.000194616	0.0026	0.023007	FALSE	FALSE	FALSE	ieu-b-4874	16	80690635	0.000465099	373295	0.68	bladder cancer	TRUE	NA	NA	NA	NA	NA	NA	NA	6.57e-06	16	80690635	3408	25.75	TRUE	2	1	TRUE
CD45RA- CD28- CD8br AC	rs146127940	A	G	A	G	145.9	-0.000760582	0.0022	0.017834	FALSE	FALSE	FALSE	ieu-b-4874	17	29929827	0.000541933	373295	0.16	bladder cancer	TRUE	NA	NA	NA	NA	NA	NA	NA	3.34e-07	17	29929827	3408	28.52	TRUE	2	1	TRUE
CD45RA- CD28- CD8br AC	rs146164275	G	A	G	A	262.3	0.000414715	0.0009	0.011659	FALSE	FALSE	FALSE	ieu-b-4874	17	76005958	0.000651084	373295	0.52	bladder cancer	TRUE	NA	NA	NA	NA	NA	NA	NA	5.71e-09	17	76005958	3408	44.92	TRUE	2	1	TRUE
CD45RA- CD28- CD8br AC	rs146914701	A	C	A	C	61.08	-0.000638623	0.0135	0.015199	FALSE	FALSE	FALSE	ieu-b-4874	10	109409332	0.000568006	373295	0.26	bladder cancer	TRUE	NA	NA	NA	NA	NA	NA	NA	1.77e-07	10	109409332	3408	11.67	TRUE	2	1	TRUE
CD45RA- CD28- CD8br AC	rs146940094	T	G	T	G	285.3	0.000863814	0.0007	0.01079	FALSE	FALSE	FALSE	ieu-b-4874	15	94946993	0.000672284	373295	0.2	bladder cancer	TRUE	NA	NA	NA	NA	NA	NA	NA	1.66e-09	15	94946993	3408	47.21	TRUE	2	1	TRUE
CD45RA- CD28- CD8br AC	rs146986354	T	C	T	C	216.5	-0.000992379	0.0013	0.043538	FALSE	FALSE	FALSE	ieu-b-4874	15	29116366	0.00046002	373295	0.0309999	bladder cancer	TRUE	NA	NA	NA	NA	NA	NA	NA	7.27e-08	15	29116366	3408	40.13	TRUE	2	1	TRUE
CD45RA- CD28- CD8br AC	rs147014864	T	G	T	G	164.9	0.00149959	0.0018	0.010179	FALSE	FALSE	FALSE	ieu-b-4874	5	22132055	0.000696675	373295	0.0309999	bladder cancer	TRUE	NA	NA	NA	NA	NA	NA	NA	2.47e-07	5	22132055	3408	31.9	TRUE	2	1	TRUE
CD45RA- CD28- CD8br AC	rs147205787	T	C	T	C	164.6	0.000719506	0.0012	0.01656	FALSE	FALSE	FALSE	ieu-b-4874	2	144815972	0.000550569	373295	0.19	bladder cancer	TRUE	NA	NA	NA	NA	NA	NA	NA	8.38e-06	2	144815972	3408	36.88	TRUE	2	1	TRUE
CD45RA- CD28- CD8br AC	rs147385696	G	C	G	C	326.5	-4.94e-05	0.0006	0.023003	FALSE	TRUE	FALSE	ieu-b-4874	6	143880059	0.000456051	373295	0.91	bladder cancer	TRUE	NA	NA	NA	NA	NA	NA	NA	5.13e-09	6	143880059	3408	55.73	TRUE	2	1	TRUE
CD45RA- CD28- CD8br AC	rs147398419	T	G	T	G	51.71	3.57e-05	0.0157	0.009952	FALSE	FALSE	FALSE	ieu-b-4874	13	23525796	0.000735503	373295	0.96	bladder cancer	TRUE	NA	NA	NA	NA	NA	NA	NA	2.49e-06	13	23525796	3408	10.96	TRUE	2	1	TRUE
CD45RA- CD28- CD8br AC	rs147706586	T	C	T	C	81.67	-0.000192566	0.0053	0.012159	FALSE	FALSE	FALSE	ieu-b-4874	18	3555698	0.000696545	373295	0.780001	bladder cancer	TRUE	NA	NA	NA	NA	NA	NA	NA	8.2e-06	18	3555698	3408	18.28	TRUE	2	1	TRUE
CD45RA- CD28- CD8br AC	rs148026776	A	C	A	C	174.2	0.000356274	0.0012	0.014772	FALSE	FALSE	FALSE	ieu-b-4874	2	155487782	0.000613772	373295	0.56	bladder cancer	TRUE	NA	NA	NA	NA	NA	NA	NA	2.11e-06	2	155487782	3408	36.66	TRUE	2	1	TRUE
CD45RA- CD28- CD8br AC	rs148225159	T	C	T	C	113	-0.00027053	0.0032	0.011868	FALSE	FALSE	FALSE	ieu-b-4874	18	56129994	0.00063241	373295	0.67	bladder cancer	TRUE	NA	NA	NA	NA	NA	NA	NA	1.75e-06	18	56129994	3408	23.6	TRUE	2	1	TRUE
CD45RA- CD28- CD8br AC	rs148362510	C	G	C	G	363.2	-0.000181454	0.0004	0.010969	FALSE	TRUE	FALSE	ieu-b-4874	18	3267975	0.000696267	373295	0.79	bladder cancer	TRUE	NA	NA	NA	NA	NA	NA	NA	1.59e-09	18	3267975	3408	60.02	TRUE	2	1	TRUE
CD45RA- CD28- CD8br AC	rs148620542	T	A	T	A	358.6	0.000386648	0.0006	0.015225	FALSE	TRUE	FALSE	ieu-b-4874	1	178035728	0.000575899	373295	0.5	bladder cancer	TRUE	NA	NA	NA	NA	NA	NA	NA	4.54e-12	1	178035728	3408	51.64	TRUE	2	1	TRUE
CD45RA- CD28- CD8br AC	rs148799115	C	A	C	A	55.39	0.0013694	0.0175	0.012334	FALSE	FALSE	FALSE	ieu-b-4874	4	45244488	0.000638457	373295	0.032	bladder cancer	TRUE	NA	NA	NA	NA	NA	NA	NA	2.87e-08	4	45244488	3408	9.959	TRUE	2	1	TRUE
CD45RA- CD28- CD8br AC	rs148889514	A	G	A	G	118.5	0.000246001	0.0023	0.018185	FALSE	FALSE	FALSE	ieu-b-4874	10	111548575	0.000514491	373295	0.630001	bladder cancer	TRUE	NA	NA	NA	NA	NA	NA	NA	3.88e-06	10	111548575	3408	25.62	TRUE	2	1	TRUE
CD45RA- CD28- CD8br AC	rs149043871	A	G	A	G	230.8	-5.12e-05	0.0007	0.015681	FALSE	FALSE	FALSE	ieu-b-4874	13	102446635	0.000546679	373295	0.93	bladder cancer	TRUE	NA	NA	NA	NA	NA	NA	NA	1.93e-06	13	102446635	3408	48.41	TRUE	2	1	TRUE
CD45RA- CD28- CD8br AC	rs149124296	C	G	C	G	307.6	-0.000673874	0.0006	0.019248	FALSE	TRUE	FALSE	ieu-b-4874	1	213124992	0.000534513	373295	0.21	bladder cancer	TRUE	NA	NA	NA	NA	NA	NA	NA	3.35e-08	1	213124992	3408	55.58	TRUE	2	1	TRUE
CD45RA- CD28- CD8br AC	rs149532201	A	G	A	G	180	8e-05	0.0019	0.02194	FALSE	FALSE	FALSE	ieu-b-4874	18	26538114	0.00047118	373295	0.87	bladder cancer	TRUE	TRUE	rs149532201	rs141189471	A	G	T	G	9.07e-08	18	26456104	3408	33.61	TRUE	2	1	TRUE
CD45RA- CD28- CD8br AC	rs149716976	G	A	G	A	118.8	-0.000454768	0.0057	0.021964	FALSE	FALSE	FALSE	ieu-b-4874	16	75062625	0.000478677	373295	0.34	bladder cancer	TRUE	NA	NA	NA	NA	NA	NA	NA	2.27e-12	16	75062625	3408	16.87	TRUE	2	1	TRUE
CD45RA- CD28- CD8br AC	rs149737122	T	G	T	G	342.5	-8.65e-05	0.0003	0.023247	FALSE	FALSE	FALSE	ieu-b-4874	1	96560455	0.000449532	373295	0.85	bladder cancer	TRUE	NA	NA	NA	NA	NA	NA	NA	1.98e-06	1	96560455	3408	71.9	TRUE	2	1	TRUE
CD45RA- CD28- CD8br AC	rs149782409	T	C	T	C	314.9	-0.000382632	0.0004	0.021385	FALSE	FALSE	FALSE	ieu-b-4874	6	14931262	0.000476561	373295	0.42	bladder cancer	TRUE	NA	NA	NA	NA	NA	NA	NA	2.48e-06	6	14931262	3408	66.75	TRUE	2	1	TRUE
CD45RA- CD28- CD8br AC	rs149994650	A	C	A	C	473.4	-0.000739917	0.0003	0.015591	FALSE	FALSE	FALSE	ieu-b-4874	3	18550864	0.000568491	373295	0.19	bladder cancer	TRUE	NA	NA	NA	NA	NA	NA	NA	6.1e-09	3	18550864	3408	81.22	TRUE	2	1	TRUE
CD45RA- CD28- CD8br AC	rs150416566	T	C	T	C	38.01	0.000284423	0.0283	0.020243	FALSE	FALSE	FALSE	ieu-b-4874	1	108257502	0.000483056	373295	0.56	bladder cancer	TRUE	NA	NA	NA	NA	NA	NA	NA	2.27e-06	1	108257502	3408	8.027	TRUE	2	1	TRUE
CD45RA- CD28- CD8br AC	rs150841550	A	G	A	G	244.1	0.000188906	0.0007	0.013485	FALSE	FALSE	FALSE	ieu-b-4874	10	11478633	0.000600909	373295	0.75	bladder cancer	TRUE	NA	NA	NA	NA	NA	NA	NA	7.18e-07	10	11478633	3408	49.16	TRUE	2	1	TRUE
CD45RA- CD28- CD8br AC	rs151052734	A	G	A	G	116.2	0.000408764	0.0043	0.02999	FALSE	FALSE	FALSE	ieu-b-4874	16	51075587	0.000405739	373295	0.31	bladder cancer	TRUE	NA	NA	NA	NA	NA	NA	NA	7.51e-08	16	51075587	3408	21.55	TRUE	2	1	TRUE
CD45RA- CD28- CD8br AC	rs151120803	A	G	A	G	402.2	0.00114707	0.0004	0.014891	FALSE	FALSE	FALSE	ieu-b-4874	9	96711406	0.000565092	373295	0.0420001	bladder cancer	TRUE	NA	NA	NA	NA	NA	NA	NA	4.24e-11	9	96711406	3408	60.78	TRUE	2	1	TRUE
CD45RA- CD28- CD8br AC	rs151145927	A	G	A	G	613.8	-0.000119888	0.0001	0.013833	FALSE	FALSE	FALSE	ieu-b-4874	18	38375388	0.000593873	373295	0.84	bladder cancer	TRUE	NA	NA	NA	NA	NA	NA	NA	1.5e-11	18	38375388	3408	90.65	TRUE	2	1	TRUE
CD45RA- CD28- CD8br AC	rs151261173	A	G	A	G	177.3	0.000464187	0.0013	0.017525	FALSE	FALSE	FALSE	ieu-b-4874	7	70763152	0.000533847	373295	0.38	bladder cancer	TRUE	NA	NA	NA	NA	NA	NA	NA	1.17e-06	7	70763152	3408	36.41	TRUE	2	1	TRUE
CD45RA- CD28- CD8br AC	rs16864501	A	G	A	G	760.5	-0.000939929	0.0001	0.018535	FALSE	FALSE	FALSE	ieu-b-4874	3	152385976	0.000506322	373295	0.0629999	bladder cancer	TRUE	NA	NA	NA	NA	NA	NA	NA	5.25e-14	3	152385976	3408	100.6	TRUE	2	1	TRUE
CD45RA- CD28- CD8br AC	rs17008005	C	G	C	G	24.07	0.000132797	0.0646	0.067104	FALSE	TRUE	FALSE	ieu-b-4874	2	29596767	0.000270269	373295	0.62	bladder cancer	TRUE	NA	NA	NA	NA	NA	NA	NA	7.61e-06	2	29596767	3408	5.37	TRUE	2	1	TRUE
CD45RA- CD28- CD8br AC	rs17180391	C	G	C	G	243.9	0.000675433	0.0007	0.022805	FALSE	TRUE	FALSE	ieu-b-4874	14	72797255	0.00045247	373295	0.14	bladder cancer	TRUE	NA	NA	NA	NA	NA	NA	NA	2.28e-07	14	72797255	3408	47.03	TRUE	2	1	TRUE
CD45RA- CD28- CD8br AC	rs17212021	C	T	C	T	-22.92	0.000647415	0.2372	0.030292	FALSE	FALSE	FALSE	ieu-b-4874	6	32637474	0.000394134	373295	0.1	bladder cancer	TRUE	NA	NA	NA	NA	NA	NA	NA	2.31e-08	6	32637474	3408	4.094	TRUE	2	1	TRUE
CD45RA- CD28- CD8br AC	rs17676161	C	G	C	G	216.7	0.000214648	0.0013	0.041486	FALSE	TRUE	FALSE	ieu-b-4874	11	65259911	0.00035588	373295	0.55	bladder cancer	TRUE	NA	NA	NA	NA	NA	NA	NA	2.33e-09	11	65259911	3408	36.18	TRUE	2	1	TRUE
CD45RA- CD28- CD8br AC	rs17712916	A	G	A	G	122.4	0.000207204	0.0025	0.057124	FALSE	FALSE	FALSE	ieu-b-4874	12	64607264	0.000290948	373295	0.48	bladder cancer	TRUE	NA	NA	NA	NA	NA	NA	NA	2.21e-06	12	64607264	3408	25.83	TRUE	2	1	TRUE
CD45RA- CD28- CD8br AC	rs181551194	T	A	T	A	109.8	-0.00057354	0.0031	0.022011	FALSE	TRUE	FALSE	ieu-b-4874	7	73339258	0.00047591	373295	0.23	bladder cancer	TRUE	NA	NA	NA	NA	NA	NA	NA	6.36e-06	7	73339258	3408	24.29	TRUE	2	1	TRUE
CD45RA- CD28- CD8br AC	rs183203096	C	G	C	G	344	-7.59e-05	0.0003	0.014406	FALSE	TRUE	FALSE	ieu-b-4874	1	103246274	0.000635632	373295	0.9	bladder cancer	TRUE	NA	NA	NA	NA	NA	NA	NA	7.21e-06	1	103246274	3408	76.55	TRUE	2	1	TRUE
CD45RA- CD28- CD8br AC	rs183382760	C	A	C	A	1005	0.000136985	0.0003	0.014269	FALSE	FALSE	FALSE	ieu-b-4874	4	116470715	0.000594043	373295	0.82	bladder cancer	TRUE	NA	NA	NA	NA	NA	NA	NA	1.39e-14	4	116470715	3408	130	TRUE	2	1	TRUE
CD45RA- CD28- CD8br AC	rs185697137	C	T	C	T	183.6	0.000120073	0.0012	0.010433	FALSE	FALSE	FALSE	ieu-b-4874	2	147046171	0.000673797	373295	0.86	bladder cancer	TRUE	TRUE	rs185697137	rs138032404	C	T	A	G	7.19e-07	2	147044386	3408	36.98	TRUE	2	1	TRUE
CD45RA- CD28- CD8br AC	rs185778924	A	G	A	G	332.4	-0.000864523	0.0006	0.011693	FALSE	FALSE	FALSE	ieu-b-4874	7	148905542	0.000691469	373295	0.21	bladder cancer	TRUE	NA	NA	NA	NA	NA	NA	NA	3.92e-09	7	148905542	3408	56.32	TRUE	2	1	TRUE
CD45RA- CD28- CD8br AC	rs185854402	C	T	C	T	157.9	-0.000610483	0.0018	0.010379	FALSE	FALSE	FALSE	ieu-b-4874	11	116624918	0.000685601	373295	0.37	bladder cancer	TRUE	NA	NA	NA	NA	NA	NA	NA	5.4e-06	11	116624918	3408	34.66	TRUE	2	1	TRUE
CD45RA- CD28- CD8br AC	rs186595909	A	G	A	G	402.2	-0.00075909	0.0003	0.013087	FALSE	FALSE	FALSE	ieu-b-4874	15	78554710	0.000606992	373295	0.21	bladder cancer	TRUE	NA	NA	NA	NA	NA	NA	NA	2.39e-08	15	78554710	3408	71.9	TRUE	2	1	TRUE
CD45RA- CD28- CD8br AC	rs186889529	A	T	A	T	96.27	-0.000898308	0.0035	0.010819	FALSE	TRUE	FALSE	ieu-b-4874	11	59109032	0.000681176	373295	0.19	bladder cancer	TRUE	NA	NA	NA	NA	NA	NA	NA	6.8e-06	11	59109032	3408	21.36	TRUE	2	1	TRUE
CD45RA- CD28- CD8br AC	rs188394601	G	T	G	T	654.7	0.000895708	0.0003	0.011048	FALSE	FALSE	FALSE	ieu-b-4874	16	70343845	0.000718249	373295	0.21	bladder cancer	TRUE	NA	NA	NA	NA	NA	NA	NA	1.06e-08	16	70343845	3408	114.1	TRUE	2	1	TRUE
CD45RA- CD28- CD8br AC	rs189683893	A	C	A	C	138.5	0.000671862	0.0037	0.015092	FALSE	FALSE	FALSE	ieu-b-4874	10	89153882	0.000590336	373295	0.26	bladder cancer	TRUE	NA	NA	NA	NA	NA	NA	NA	1.8e-10	10	89153882	3408	21.65	TRUE	2	1	TRUE
CD45RA- CD28- CD8br AC	rs190474871	T	C	T	C	169	0.00102071	0.0012	0.015595	FALSE	FALSE	FALSE	ieu-b-4874	13	25506269	0.000567367	373295	0.0719996	bladder cancer	TRUE	NA	NA	NA	NA	NA	NA	NA	4.71e-06	13	25506269	3408	36.86	TRUE	2	1	TRUE
CD45RA- CD28- CD8br AC	rs192021609	A	G	A	G	186.7	0.000410491	0.0012	0.017641	FALSE	FALSE	FALSE	ieu-b-4874	4	157192771	0.000532453	373295	0.44	bladder cancer	TRUE	NA	NA	NA	NA	NA	NA	NA	3.37e-07	4	157192771	3408	36.52	TRUE	2	1	TRUE
CD45RA- CD28- CD8br AC	rs192253149	C	T	C	T	48.75	0.000542353	0.0157	0.016835	FALSE	FALSE	FALSE	ieu-b-4874	8	6255718	0.00059384	373295	0.36	bladder cancer	TRUE	NA	NA	NA	NA	NA	NA	NA	4.21e-06	8	6255718	3408	10.58	TRUE	2	1	TRUE
CD45RA- CD28- CD8br AC	rs192553272	T	C	T	C	293.3	0.000397224	0.0007	0.013911	FALSE	FALSE	FALSE	ieu-b-4874	4	114347303	0.000626645	373295	0.53	bladder cancer	TRUE	NA	NA	NA	NA	NA	NA	NA	2.16e-09	4	114347303	3408	48.87	TRUE	2	1	TRUE
CD45RA- CD28- CD8br AC	rs192717771	C	G	C	G	166.2	-0.000128062	0.0013	0.011536	FALSE	TRUE	FALSE	ieu-b-4874	21	28699078	0.000654891	373295	0.84	bladder cancer	TRUE	NA	NA	NA	NA	NA	NA	NA	7.91e-06	21	28699078	3408	37.14	TRUE	2	1	TRUE
CD45RA- CD28- CD8br AC	rs192932211	G	A	G	A	227.1	-0.000462928	0.0007	0.013241	FALSE	FALSE	FALSE	ieu-b-4874	2	10422752	0.000609893	373295	0.450001	bladder cancer	TRUE	NA	NA	NA	NA	NA	NA	NA	1.5e-06	2	10422752	3408	47.11	TRUE	2	1	TRUE
CD45RA- CD28- CD8br AC	rs2071556	T	G	T	G	-14.59	-0.00010878	0.6067	0.584358	FALSE	FALSE	FALSE	ieu-b-4874	6	32904601	0.000137197	373295	0.43	bladder cancer	TRUE	NA	NA	NA	NA	NA	NA	NA	2.4e-07	6	32904601	3408	2.819	TRUE	2	1	TRUE
CD45RA- CD28- CD8br AC	rs2615702	T	C	T	C	-397.5	-0.000924241	0.9991	0.989339	FALSE	FALSE	FALSE	ieu-b-4874	16	81462243	0.000727463	373295	0.2	bladder cancer	TRUE	NA	NA	NA	NA	NA	NA	NA	2.4e-20	16	81462243	3408	42.74	TRUE	2	1	TRUE
CD45RA- CD28- CD8br AC	rs3133836	C	T	C	T	24.38	0.000315985	0.0789	0.081109	FALSE	FALSE	FALSE	ieu-b-4874	8	104363338	0.000246917	373295	0.2	bladder cancer	TRUE	NA	NA	NA	NA	NA	NA	NA	1.1e-06	8	104363338	3408	4.994	TRUE	2	1	TRUE
CD45RA- CD28- CD8br AC	rs34592474	C	T	C	T	256.7	-1.86e-05	0.0009	0.013392	FALSE	FALSE	FALSE	ieu-b-4874	7	57279055	0.000644048	373295	0.98	bladder cancer	TRUE	NA	NA	NA	NA	NA	NA	NA	1.91e-08	7	57279055	3408	45.57	TRUE	2	1	TRUE
CD45RA- CD28- CD8br AC	rs34609592	A	G	A	G	420	0.000394469	0.0003	0.011943	FALSE	FALSE	FALSE	ieu-b-4874	9	136915695	0.000665938	373295	0.55	bladder cancer	TRUE	NA	NA	NA	NA	NA	NA	NA	3.87e-09	9	136915695	3408	71.13	TRUE	2	1	TRUE
CD45RA- CD28- CD8br AC	rs35046933	G	A	G	A	112.1	-0.000168768	0.0029	0.027142	FALSE	FALSE	FALSE	ieu-b-4874	4	57059988	0.0004338	373295	0.7	bladder cancer	TRUE	NA	NA	NA	NA	NA	NA	NA	2.55e-06	4	57059988	3408	23.78	TRUE	2	1	TRUE
CD45RA- CD28- CD8br AC	rs35078472	C	A	C	A	215.5	-0.000620207	0.0007	0.013783	FALSE	FALSE	FALSE	ieu-b-4874	12	127715831	0.000579414	373295	0.28	bladder cancer	TRUE	NA	NA	NA	NA	NA	NA	NA	3.27e-06	12	127715831	3408	46.23	TRUE	2	1	TRUE
CD45RA- CD28- CD8br AC	rs35268412	C	T	C	T	184.5	-8.75e-05	0.0013	0.02483	FALSE	FALSE	FALSE	ieu-b-4874	3	141999791	0.000452006	373295	0.85	bladder cancer	TRUE	NA	NA	NA	NA	NA	NA	NA	1.62e-06	3	141999791	3408	38.41	TRUE	2	1	TRUE
CD45RA- CD28- CD8br AC	rs35779961	A	G	A	G	229.9	-0.000480192	0.0009	0.022844	FALSE	FALSE	FALSE	ieu-b-4874	13	102262527	0.000458419	373295	0.29	bladder cancer	TRUE	NA	NA	NA	NA	NA	NA	NA	8.67e-07	13	102262527	3408	46.65	TRUE	2	1	TRUE
CD45RA- CD28- CD8br AC	rs41276984	G	C	G	C	285.3	-0.000204233	0.0012	0.020714	FALSE	TRUE	FALSE	ieu-b-4874	20	37580670	0.000473872	373295	0.67	bladder cancer	TRUE	NA	NA	NA	NA	NA	NA	NA	7.09e-13	20	37580670	3408	39.59	TRUE	2	1	TRUE
CD45RA- CD28- CD8br AC	rs528814030	T	C	T	C	134.4	1.63e-05	0.0025	0.032269	FALSE	FALSE	FALSE	ieu-b-4874	11	117015217	0.000383505	373295	0.97	bladder cancer	TRUE	NA	NA	NA	NA	NA	NA	NA	6.06e-07	11	117015217	3408	26.88	TRUE	2	1	TRUE
CD45RA- CD28- CD8br AC	rs535005711	A	G	A	G	557.6	0.000141211	0.0001	0.012889	FALSE	FALSE	FALSE	ieu-b-4874	8	144233069	0.000641471	373295	0.83	bladder cancer	TRUE	NA	NA	NA	NA	NA	NA	NA	4.91e-08	8	144233069	3408	102	TRUE	2	1	TRUE
CD45RA- CD28- CD8br AC	rs541695620	G	A	G	A	29.71	0.000958871	0.0534	0.016317	FALSE	FALSE	FALSE	ieu-b-4874	6	69157587	0.000553296	373295	0.0830004	bladder cancer	TRUE	NA	NA	NA	NA	NA	NA	NA	5.29e-07	6	69157587	3408	5.912	TRUE	2	1	TRUE
CD45RA- CD28- CD8br AC	rs545794900	C	T	C	T	137.7	-0.000356375	0.0035	0.022521	FALSE	FALSE	FALSE	ieu-b-4874	3	3710729	0.000468109	373295	0.450001	bladder cancer	TRUE	NA	NA	NA	NA	NA	NA	NA	9.64e-10	3	3710729	3408	22.45	TRUE	2	1	TRUE
CD45RA- CD28- CD8br AC	rs554483844	T	C	T	C	227.3	0.00105174	0.0007	0.010168	FALSE	FALSE	FALSE	ieu-b-4874	14	88292196	0.000676041	373295	0.12	bladder cancer	TRUE	NA	NA	NA	NA	NA	NA	NA	1.39e-06	14	88292196	3408	47.01	TRUE	2	1	TRUE
CD45RA- CD28- CD8br AC	rs55779481	T	C	T	C	111.7	-0.000441048	0.0026	0.012571	FALSE	FALSE	FALSE	ieu-b-4874	6	119136518	0.000637414	373295	0.49	bladder cancer	TRUE	NA	NA	NA	NA	NA	NA	NA	8.36e-06	6	119136518	3408	25.03	TRUE	2	1	TRUE
CD45RA- CD28- CD8br AC	rs55830085	T	C	T	C	548.7	0.000323074	0.0004	0.020763	FALSE	FALSE	FALSE	ieu-b-4874	4	106862213	0.000494991	373295	0.51	bladder cancer	TRUE	NA	NA	NA	NA	NA	NA	NA	3.01e-08	4	106862213	3408	98.8	TRUE	2	1	TRUE
CD45RA- CD28- CD8br AC	rs55881385	T	G	T	G	721.2	-0.000532652	0.0001	0.014264	FALSE	FALSE	FALSE	ieu-b-4874	1	34724192	0.000588447	373295	0.37	bladder cancer	TRUE	NA	NA	NA	NA	NA	NA	NA	4.5e-15	1	34724192	3408	91.57	TRUE	2	1	TRUE
CD45RA- CD28- CD8br AC	rs578157000	C	A	C	A	111.4	-0.000317965	0.0029	0.017254	FALSE	FALSE	FALSE	ieu-b-4874	18	6345544	0.000535223	373295	0.55	bladder cancer	TRUE	TRUE	rs578157000	rs76791979	C	A	A	C	8.1e-06	18	6304023	3408	24.93	TRUE	2	1	TRUE
CD45RA- CD28- CD8br AC	rs58905133	G	A	G	A	20.08	-9.8e-05	0.3526	0.379643	FALSE	FALSE	FALSE	ieu-b-4874	2	38892207	0.000141658	373295	0.49	bladder cancer	TRUE	TRUE	rs58905133	rs7559619	G	A	G	A	1.18e-12	2	38887964	3408	2.814	TRUE	2	1	TRUE
CD45RA- CD28- CD8br AC	rs5997061	A	T	A	T	52.6	0.000232331	0.0144	0.141863	FALSE	TRUE	FALSE	ieu-b-4874	22	26677514	0.000196477	373295	0.24	bladder cancer	TRUE	NA	NA	NA	NA	NA	NA	NA	2.49e-06	22	26677514	3408	11.15	TRUE	2	1	TRUE
CD45RA- CD28- CD8br AC	rs6027989	T	C	T	C	11.73	0.000221222	0.5461	0.536906	FALSE	FALSE	FALSE	ieu-b-4874	20	59618023	0.000136607	373295	0.11	bladder cancer	TRUE	NA	NA	NA	NA	NA	NA	NA	9.6e-06	20	59618023	3408	2.646	TRUE	2	1	TRUE
CD45RA- CD28- CD8br AC	rs61772921	C	T	C	T	644.1	-0.0011029	0.0001	0.015969	FALSE	FALSE	FALSE	ieu-b-4874	1	80897562	0.000540815	373295	0.0409996	bladder cancer	TRUE	NA	NA	NA	NA	NA	NA	NA	1.37e-09	1	80897562	3408	106	TRUE	2	1	TRUE
CD45RA- CD28- CD8br AC	rs61864030	C	T	C	T	284.3	0.000182449	0.0006	0.025357	FALSE	FALSE	FALSE	ieu-b-4874	10	133431823	0.000430271	373295	0.67	bladder cancer	TRUE	NA	NA	NA	NA	NA	NA	NA	3.69e-08	10	133431823	3408	51.52	TRUE	2	1	TRUE
CD45RA- CD28- CD8br AC	rs61939536	G	A	G	A	379.5	0.000229271	0.0003	0.017242	FALSE	FALSE	FALSE	ieu-b-4874	12	128643151	0.000519418	373295	0.66	bladder cancer	TRUE	NA	NA	NA	NA	NA	NA	NA	1.83e-07	12	128643151	3408	72.6	TRUE	2	1	TRUE
CD45RA- CD28- CD8br AC	rs62021713	T	C	T	C	1065	-0.000273903	0.0001	0.023355	FALSE	FALSE	FALSE	ieu-b-4874	15	50365389	0.000464436	373295	0.56	bladder cancer	TRUE	NA	NA	NA	NA	NA	NA	NA	1.78e-09	15	50365389	3408	176.6	TRUE	2	1	TRUE
CD45RA- CD28- CD8br AC	rs62033204	A	T	A	T	195.7	-6.65e-05	0.0015	0.029115	FALSE	TRUE	FALSE	ieu-b-4874	16	17388418	0.000415695	373295	0.87	bladder cancer	TRUE	NA	NA	NA	NA	NA	NA	NA	3.69e-08	16	17388418	3408	35.46	TRUE	2	1	TRUE
CD45RA- CD28- CD8br AC	rs62369101	A	G	A	G	251.6	5.94e-05	0.001	0.015859	FALSE	FALSE	FALSE	ieu-b-4874	5	97959184	0.000585673	373295	0.92	bladder cancer	TRUE	NA	NA	NA	NA	NA	NA	NA	2.78e-09	5	97959184	3408	42.22	TRUE	2	1	TRUE
CD45RA- CD28- CD8br AC	rs62383308	A	G	A	G	38.64	0.000126759	0.0239	0.082121	FALSE	FALSE	FALSE	ieu-b-4874	5	165460085	0.000248613	373295	0.61	bladder cancer	TRUE	NA	NA	NA	NA	NA	NA	NA	9.16e-06	5	165460085	3408	8.697	TRUE	2	1	TRUE
CD45RA- CD28- CD8br AC	rs62409210	A	G	A	G	610.4	-0.000367781	0.0001	0.021012	FALSE	FALSE	FALSE	ieu-b-4874	4	25412773	0.000470787	373295	0.43	bladder cancer	TRUE	NA	NA	NA	NA	NA	NA	NA	1.11e-08	4	25412773	3408	106.6	TRUE	2	1	TRUE
CD45RA- CD28- CD8br AC	rs62513410	A	G	A	G	75.05	0.00066434	0.0098	0.029561	FALSE	FALSE	FALSE	ieu-b-4874	8	142607179	0.000432878	373295	0.12	bladder cancer	TRUE	NA	NA	NA	NA	NA	NA	NA	8.29e-09	8	142607179	3408	12.99	TRUE	2	1	TRUE
CD45RA- CD28- CD8br AC	rs62582217	T	C	T	C	49.04	-0.000307642	0.0183	0.024146	FALSE	FALSE	FALSE	ieu-b-4874	9	134320210	0.000439931	373295	0.48	bladder cancer	TRUE	NA	NA	NA	NA	NA	NA	NA	4.89e-07	9	134320210	3408	9.728	TRUE	2	1	TRUE
CD45RA- CD28- CD8br AC	rs6586916	C	A	C	A	-101.9	2.82e-05	0.9956	0.971793	FALSE	FALSE	FALSE	ieu-b-4874	8	20371089	0.000415082	373295	0.95	bladder cancer	TRUE	NA	NA	NA	NA	NA	NA	NA	9.65e-07	8	20371089	3408	20.76	TRUE	2	1	TRUE
CD45RA- CD28- CD8br AC	rs7011687	G	A	G	A	93.75	-0.000121505	0.0044	0.0139	FALSE	FALSE	FALSE	ieu-b-4874	8	141472683	0.000579636	373295	0.83	bladder cancer	TRUE	NA	NA	NA	NA	NA	NA	NA	6e-06	8	141472683	3408	20.68	TRUE	2	1	TRUE
CD45RA- CD28- CD8br AC	rs71354045	C	T	C	T	135.1	0.000162611	0.0026	0.015149	FALSE	FALSE	FALSE	ieu-b-4874	19	57840862	0.000601357	373295	0.79	bladder cancer	TRUE	NA	NA	NA	NA	NA	NA	NA	3e-07	19	57840862	3408	26.31	TRUE	2	1	TRUE
CD45RA- CD28- CD8br AC	rs71567655	A	G	A	G	211.9	7.6e-05	0.0012	0.010322	FALSE	FALSE	FALSE	ieu-b-4874	6	162968515	0.00066649	373295	0.91	bladder cancer	TRUE	NA	NA	NA	NA	NA	NA	NA	7.14e-07	6	162968515	3408	42.67	TRUE	2	1	TRUE
CD45RA- CD28- CD8br AC	rs7238907	C	T	C	T	257.3	-0.000454793	0.0007	0.012823	FALSE	FALSE	FALSE	ieu-b-4874	18	71686718	0.000612798	373295	0.46	bladder cancer	TRUE	NA	NA	NA	NA	NA	NA	NA	5.52e-08	18	71686718	3408	47.25	TRUE	2	1	TRUE
CD45RA- CD28- CD8br AC	rs72673255	A	G	A	G	202.6	0.000230584	0.001	0.015952	FALSE	FALSE	FALSE	ieu-b-4874	4	126220318	0.000546403	373295	0.67	bladder cancer	TRUE	NA	NA	NA	NA	NA	NA	NA	3.41e-07	4	126220318	3408	39.65	TRUE	2	1	TRUE
CD45RA- CD28- CD8br AC	rs72728362	C	T	C	T	375.7	-0.000197698	0.0007	0.017869	FALSE	FALSE	FALSE	ieu-b-4874	8	127054086	0.000509804	373295	0.7	bladder cancer	TRUE	NA	NA	NA	NA	NA	NA	NA	2.64e-10	8	127054086	3408	59.27	TRUE	2	1	TRUE
CD45RA- CD28- CD8br AC	rs72739876	T	G	T	G	465.5	0.0011376	0.0003	0.014235	FALSE	FALSE	FALSE	ieu-b-4874	15	49106401	0.000588134	373295	0.0530005	bladder cancer	TRUE	NA	NA	NA	NA	NA	NA	NA	1.74e-07	15	49106401	3408	88.9	TRUE	2	1	TRUE
CD45RA- CD28- CD8br AC	rs72743927	G	A	G	A	154.6	-0.000330533	0.0018	0.013747	FALSE	FALSE	FALSE	ieu-b-4874	9	98810796	0.000580884	373295	0.57	bladder cancer	TRUE	NA	NA	NA	NA	NA	NA	NA	4.02e-07	9	98810796	3408	30.45	TRUE	2	1	TRUE
CD45RA- CD28- CD8br AC	rs72773345	G	A	G	A	302.9	0.000555834	0.0004	0.024911	FALSE	FALSE	FALSE	ieu-b-4874	10	8494842	0.000472465	373295	0.24	bladder cancer	TRUE	NA	NA	NA	NA	NA	NA	NA	2.19e-06	10	8494842	3408	63.85	TRUE	2	1	TRUE
CD45RA- CD28- CD8br AC	rs72815709	C	T	C	T	185.1	-0.000487809	0.0022	0.045799	FALSE	FALSE	FALSE	ieu-b-4874	2	80415786	0.000330411	373295	0.14	bladder cancer	TRUE	NA	NA	NA	NA	NA	NA	NA	6.76e-12	2	80415786	3408	26.88	TRUE	2	1	TRUE
CD45RA- CD28- CD8br AC	rs72929459	T	C	T	C	485.7	-0.000678392	0.0003	0.01074	FALSE	FALSE	FALSE	ieu-b-4874	2	200181613	0.000669219	373295	0.31	bladder cancer	TRUE	NA	NA	NA	NA	NA	NA	NA	3.29e-11	2	200181613	3408	72.98	TRUE	2	1	TRUE
CD45RA- CD28- CD8br AC	rs72996438	C	T	C	T	306.9	0.000590613	0.0004	0.025674	FALSE	FALSE	FALSE	ieu-b-4874	2	211172214	0.000424761	373295	0.16	bladder cancer	TRUE	NA	NA	NA	NA	NA	NA	NA	2.42e-07	2	211172214	3408	59.3	TRUE	2	1	TRUE
CD45RA- CD28- CD8br AC	rs74444952	G	C	G	C	141.4	-0.000615267	0.0016	0.015463	FALSE	TRUE	FALSE	ieu-b-4874	13	36209759	0.000589894	373295	0.3	bladder cancer	TRUE	NA	NA	NA	NA	NA	NA	NA	8.62e-06	13	36209759	3408	31.72	TRUE	2	1	TRUE
CD45RA- CD28- CD8br AC	rs74651043	T	A	T	A	419.1	0.000415405	0.0003	0.012326	FALSE	TRUE	FALSE	ieu-b-4874	6	24233134	0.000612346	373295	0.5	bladder cancer	TRUE	NA	NA	NA	NA	NA	NA	NA	1.6e-08	6	24233134	3408	73.98	TRUE	2	1	TRUE
CD45RA- CD28- CD8br AC	rs74902462	T	C	T	C	123.2	-0.000340627	0.004	0.027794	FALSE	FALSE	FALSE	ieu-b-4874	12	59066617	0.000416426	373295	0.41	bladder cancer	TRUE	NA	NA	NA	NA	NA	NA	NA	1.42e-08	12	59066617	3408	21.68	TRUE	2	1	TRUE
CD45RA- CD28- CD8br AC	rs75067089	T	C	T	C	144.2	-0.000101946	0.0023	0.014425	FALSE	FALSE	FALSE	ieu-b-4874	9	14983311	0.000567561	373295	0.86	bladder cancer	TRUE	NA	NA	NA	NA	NA	NA	NA	2.29e-07	9	14983311	3408	27.81	TRUE	2	1	TRUE
CD45RA- CD28- CD8br AC	rs75067680	A	G	A	G	160.1	-0.000298019	0.0018	0.011869	FALSE	FALSE	FALSE	ieu-b-4874	10	133817829	0.000624769	373295	0.630001	bladder cancer	TRUE	NA	NA	NA	NA	NA	NA	NA	1.42e-06	10	133817829	3408	33.15	TRUE	2	1	TRUE
CD45RA- CD28- CD8br AC	rs75097808	G	T	G	T	114.9	0.000283657	0.0034	0.017413	FALSE	FALSE	FALSE	ieu-b-4874	1	154796811	0.000516843	373295	0.58	bladder cancer	TRUE	NA	NA	NA	NA	NA	NA	NA	4.12e-07	1	154796811	3408	22.64	TRUE	2	1	TRUE
CD45RA- CD28- CD8br AC	rs75346347	T	C	T	C	88.88	0.0010887	0.0073	0.014187	FALSE	FALSE	FALSE	ieu-b-4874	18	7862061	0.000581875	373295	0.061	bladder cancer	TRUE	NA	NA	NA	NA	NA	NA	NA	2.66e-08	18	7862061	3408	15.94	TRUE	2	1	TRUE
CD45RA- CD28- CD8br AC	rs75427771	A	C	A	C	150.9	0.000677727	0.0021	0.017193	FALSE	FALSE	FALSE	ieu-b-4874	20	59382138	0.000622923	373295	0.28	bladder cancer	TRUE	NA	NA	NA	NA	NA	NA	NA	6.9e-08	20	59382138	3408	27.91	TRUE	2	1	TRUE
CD45RA- CD28- CD8br AC	rs75477291	A	G	A	G	121.8	0.000474383	0.0032	0.040413	FALSE	FALSE	FALSE	ieu-b-4874	16	73579327	0.000342816	373295	0.17	bladder cancer	TRUE	NA	NA	NA	NA	NA	NA	NA	4.27e-07	16	73579327	3408	24.04	TRUE	2	1	TRUE
CD45RA- CD28- CD8br AC	rs75686073	A	G	A	G	98.24	-0.000104623	0.0037	0.015692	FALSE	FALSE	FALSE	ieu-b-4874	14	68253542	0.00054363	373295	0.85	bladder cancer	TRUE	NA	NA	NA	NA	NA	NA	NA	4.2e-06	14	68253542	3408	21.32	TRUE	2	1	TRUE
CD45RA- CD28- CD8br AC	rs75828981	A	G	A	G	283	-6.34e-05	0.0007	0.012434	FALSE	FALSE	FALSE	ieu-b-4874	2	144233823	0.000649494	373295	0.92	bladder cancer	TRUE	NA	NA	NA	NA	NA	NA	NA	1.55e-09	2	144233823	3408	46.74	TRUE	2	1	TRUE
CD45RA- CD28- CD8br AC	rs75884646	A	G	A	G	186.4	-0.0006036	0.0022	0.024736	FALSE	FALSE	FALSE	ieu-b-4874	15	95776793	0.000458193	373295	0.19	bladder cancer	TRUE	NA	NA	NA	NA	NA	NA	NA	2.26e-11	15	95776793	3408	27.77	TRUE	2	1	TRUE
CD45RA- CD28- CD8br AC	rs75893788	A	T	A	T	341.3	0.000161807	0.0004	0.011902	FALSE	TRUE	FALSE	ieu-b-4874	12	84857033	0.000648132	373295	0.8	bladder cancer	TRUE	NA	NA	NA	NA	NA	NA	NA	2.17e-06	12	84857033	3408	71.93	TRUE	2	1	TRUE
CD45RA- CD28- CD8br AC	rs76119911	G	A	G	A	166.5	-0.000556204	0.0018	0.020578	FALSE	FALSE	FALSE	ieu-b-4874	1	247712613	0.000476572	373295	0.24	bladder cancer	TRUE	NA	NA	NA	NA	NA	NA	NA	7.96e-08	1	247712613	3408	30.94	TRUE	2	1	TRUE
CD45RA- CD28- CD8br AC	rs76383831	G	A	G	A	294.5	0.000694643	0.0004	0.024915	FALSE	FALSE	FALSE	ieu-b-4874	18	74630095	0.000449801	373295	0.12	bladder cancer	TRUE	NA	NA	NA	NA	NA	NA	NA	6.28e-07	18	74630095	3408	59	TRUE	2	1	TRUE
CD45RA- CD28- CD8br AC	rs76506268	G	A	G	A	154.5	-0.000336522	0.0032	0.048403	FALSE	FALSE	FALSE	ieu-b-4874	4	187981624	0.000315126	373295	0.29	bladder cancer	TRUE	NA	NA	NA	NA	NA	NA	NA	8.23e-12	4	187981624	3408	22.53	TRUE	2	1	TRUE
CD45RA- CD28- CD8br AC	rs76595423	G	T	G	T	147.3	-0.000368994	0.0035	0.043591	FALSE	FALSE	FALSE	ieu-b-4874	1	102745011	0.00034601	373295	0.29	bladder cancer	TRUE	NA	NA	NA	NA	NA	NA	NA	3.93e-10	1	102745011	3408	23.48	TRUE	2	1	TRUE
CD45RA- CD28- CD8br AC	rs76732756	A	G	A	G	187	0.000330255	0.0016	0.013631	FALSE	FALSE	FALSE	ieu-b-4874	1	221000197	0.000605579	373295	0.59	bladder cancer	TRUE	NA	NA	NA	NA	NA	NA	NA	1.74e-08	1	221000197	3408	33.11	TRUE	2	1	TRUE
CD45RA- CD28- CD8br AC	rs76881655	A	C	A	C	92.71	-0.000112733	0.0044	0.011711	FALSE	FALSE	FALSE	ieu-b-4874	15	26109688	0.000643159	373295	0.86	bladder cancer	TRUE	NA	NA	NA	NA	NA	NA	NA	5.96e-06	15	26109688	3408	20.44	TRUE	2	1	TRUE
CD45RA- CD28- CD8br AC	rs77152285	G	A	G	A	285.1	-1.3e-05	0.0006	0.012667	FALSE	FALSE	FALSE	ieu-b-4874	4	93935039	0.000604607	373295	0.98	bladder cancer	TRUE	NA	NA	NA	NA	NA	NA	NA	2.11e-08	4	93935039	3408	50.77	TRUE	2	1	TRUE
CD45RA- CD28- CD8br AC	rs77164608	A	G	A	G	379.6	0.00022026	0.0006	0.014404	FALSE	FALSE	FALSE	ieu-b-4874	7	21673701	0.000601801	373295	0.709999	bladder cancer	TRUE	NA	NA	NA	NA	NA	NA	NA	5.76e-10	7	21673701	3408	61.08	TRUE	2	1	TRUE
CD45RA- CD28- CD8br AC	rs77243672	G	T	G	T	109	-0.000110605	0.0072	0.010669	FALSE	FALSE	FALSE	ieu-b-4874	14	76846837	0.000657973	373295	0.87	bladder cancer	TRUE	NA	NA	NA	NA	NA	NA	NA	4.64e-12	14	76846837	3408	15.71	TRUE	2	1	TRUE
CD45RA- CD28- CD8br AC	rs77307127	T	C	T	C	141.3	0.000468887	0.0021	0.026778	FALSE	FALSE	FALSE	ieu-b-4874	7	151528768	0.000427947	373295	0.27	bladder cancer	TRUE	NA	NA	NA	NA	NA	NA	NA	2.21e-06	7	151528768	3408	29.8	TRUE	2	1	TRUE
CD45RA- CD28- CD8br AC	rs77315801	C	G	C	G	180.1	0.000363	0.0016	0.024819	FALSE	TRUE	FALSE	ieu-b-4874	11	132912552	0.000452396	373295	0.42	bladder cancer	TRUE	NA	NA	NA	NA	NA	NA	NA	6.75e-08	11	132912552	3408	33.3	TRUE	2	1	TRUE
CD45RA- CD28- CD8br AC	rs77654966	A	G	A	G	26.01	0.000519374	0.0556	0.027598	FALSE	FALSE	FALSE	ieu-b-4874	8	27058930	0.000422289	373295	0.22	bladder cancer	TRUE	NA	NA	NA	NA	NA	NA	NA	9.3e-06	8	27058930	3408	5.859	TRUE	2	1	TRUE
CD45RA- CD28- CD8br AC	rs77721642	G	A	G	A	147.8	1.03e-05	0.0023	0.034422	FALSE	FALSE	FALSE	ieu-b-4874	2	154028459	0.000370897	373295	0.98	bladder cancer	TRUE	NA	NA	NA	NA	NA	NA	NA	1.26e-06	2	154028459	3408	30.44	TRUE	2	1	TRUE
CD45RA- CD28- CD8br AC	rs77777749	G	A	G	A	102.9	-0.000489792	0.0038	0.011537	FALSE	FALSE	FALSE	ieu-b-4874	6	118275279	0.000664037	373295	0.46	bladder cancer	TRUE	NA	NA	NA	NA	NA	NA	NA	1.97e-06	6	118275279	3408	21.6	TRUE	2	1	TRUE
CD45RA- CD28- CD8br AC	rs77843545	T	C	T	C	102.4	-0.000855169	0.0035	0.012686	FALSE	FALSE	FALSE	ieu-b-4874	2	237100311	0.000612063	373295	0.16	bladder cancer	TRUE	NA	NA	NA	NA	NA	NA	NA	2.21e-06	2	237100311	3408	21.6	TRUE	2	1	TRUE
CD45RA- CD28- CD8br AC	rs77937827	C	T	C	T	358.8	-0.000326181	0.0004	0.031138	FALSE	FALSE	FALSE	ieu-b-4874	20	20799344	0.000389333	373295	0.4	bladder cancer	TRUE	NA	NA	NA	NA	NA	NA	NA	2.28e-10	20	20799344	3408	56.41	TRUE	2	1	TRUE
CD45RA- CD28- CD8br AC	rs77953154	T	C	T	C	55.15	0.000481522	0.012	0.016112	FALSE	FALSE	FALSE	ieu-b-4874	5	179723042	0.000538711	373295	0.37	bladder cancer	TRUE	NA	NA	NA	NA	NA	NA	NA	3.96e-06	5	179723042	3408	11.93	TRUE	2	1	TRUE
CD45RA- CD28- CD8br AC	rs78420941	A	G	A	G	165.4	-0.00106799	0.0013	0.012714	FALSE	FALSE	FALSE	ieu-b-4874	12	50294296	0.000642466	373295	0.0959997	bladder cancer	TRUE	NA	NA	NA	NA	NA	NA	NA	3.41e-06	12	50294296	3408	35.54	TRUE	2	1	TRUE
CD45RA- CD28- CD8br AC	rs78604443	A	C	A	C	46.66	-0.000245302	0.0191	0.030357	FALSE	FALSE	FALSE	ieu-b-4874	5	179476195	0.000393672	373295	0.53	bladder cancer	TRUE	NA	NA	NA	NA	NA	NA	NA	1.89e-06	5	179476195	3408	9.776	TRUE	2	1	TRUE
CD45RA- CD28- CD8br AC	rs78656354	A	G	A	G	263.3	-0.000624183	0.0013	0.015553	FALSE	FALSE	FALSE	ieu-b-4874	1	166905650	0.00057409	373295	0.28	bladder cancer	TRUE	NA	NA	NA	NA	NA	NA	NA	1.89e-12	1	166905650	3408	37.24	TRUE	2	1	TRUE
CD45RA- CD28- CD8br AC	rs78680127	A	G	A	G	82	0.000314381	0.0057	0.030276	FALSE	FALSE	FALSE	ieu-b-4874	21	41099181	0.0003983	373295	0.43	bladder cancer	TRUE	NA	NA	NA	NA	NA	NA	NA	2.09e-06	21	41099181	3408	17.26	TRUE	2	1	TRUE
CD45RA- CD28- CD8br AC	rs78788969	G	T	G	T	17.9	-0.000121893	0.1828	0.16988	FALSE	FALSE	FALSE	ieu-b-4874	12	85026832	0.000181016	373295	0.5	bladder cancer	TRUE	NA	NA	NA	NA	NA	NA	NA	1.86e-07	12	85026832	3408	3.428	TRUE	2	1	TRUE
CD45RA- CD28- CD8br AC	rs78849864	T	C	T	C	96.8	0.00133388	0.0041	0.010415	FALSE	FALSE	FALSE	ieu-b-4874	9	134242324	0.000665138	373295	0.0449997	bladder cancer	TRUE	NA	NA	NA	NA	NA	NA	NA	1.04e-06	9	134242324	3408	19.78	TRUE	2	1	TRUE
CD45RA- CD28- CD8br AC	rs78939697	C	A	C	A	74.28	0.000849339	0.0125	0.013703	FALSE	FALSE	FALSE	ieu-b-4874	6	67374008	0.000621562	373295	0.17	bladder cancer	TRUE	NA	NA	NA	NA	NA	NA	NA	1.29e-10	6	67374008	3408	11.52	TRUE	2	1	TRUE
CD45RA- CD28- CD8br AC	rs79397670	T	C	T	C	70.05	-6.74e-05	0.0072	0.026321	FALSE	FALSE	FALSE	ieu-b-4874	3	3816462	0.000423677	373295	0.87	bladder cancer	TRUE	NA	NA	NA	NA	NA	NA	NA	8.56e-06	3	3816462	3408	15.71	TRUE	2	1	TRUE
CD45RA- CD28- CD8br AC	rs79407975	A	C	A	C	389.2	0.000820656	0.0003	0.016457	FALSE	FALSE	FALSE	ieu-b-4874	10	28109090	0.000531283	373295	0.12	bladder cancer	TRUE	NA	NA	NA	NA	NA	NA	NA	4.14e-08	10	28109090	3408	70.79	TRUE	2	1	TRUE
CD45RA- CD28- CD8br AC	rs79647440	T	C	T	C	521.4	-0.000990984	0.0004	0.012602	FALSE	FALSE	FALSE	ieu-b-4874	7	142438302	0.000669232	373295	0.14	bladder cancer	TRUE	NA	NA	NA	NA	NA	NA	NA	2.08e-09	7	142438302	3408	86.78	TRUE	2	1	TRUE
CD45RA- CD28- CD8br AC	rs79656514	A	G	A	G	80.28	-0.000334214	0.006	0.021242	FALSE	FALSE	FALSE	ieu-b-4874	1	235943573	0.000482801	373295	0.49	bladder cancer	TRUE	NA	NA	NA	NA	NA	NA	NA	3.67e-06	1	235943573	3408	17.31	TRUE	2	1	TRUE
CD45RA- CD28- CD8br AC	rs79665127	C	T	C	T	155.8	0.000372585	0.0018	0.015346	FALSE	FALSE	FALSE	ieu-b-4874	3	190758619	0.000582755	373295	0.52	bladder cancer	TRUE	NA	NA	NA	NA	NA	NA	NA	1.76e-06	3	190758619	3408	32.54	TRUE	2	1	TRUE
CD45RA- CD28- CD8br AC	rs79870119	A	G	A	G	397.6	0.000104722	0.0004	0.02789	FALSE	FALSE	FALSE	ieu-b-4874	4	64142694	0.00043618	373295	0.81	bladder cancer	TRUE	NA	NA	NA	NA	NA	NA	NA	3.5e-08	4	64142694	3408	71.92	TRUE	2	1	TRUE
CD45RA- CD28- CD8br AC	rs79888820	C	T	C	T	514.7	-0.00124157	0.0003	0.020094	FALSE	FALSE	FALSE	ieu-b-4874	15	96888705	0.000555658	373295	0.025	bladder cancer	TRUE	NA	NA	NA	NA	NA	NA	NA	3.97e-10	15	96888705	3408	82.05	TRUE	2	1	TRUE
CD45RA- CD28- CD8br AC	rs79932972	A	C	A	C	187.5	0.000300814	0.0012	0.017356	FALSE	FALSE	FALSE	ieu-b-4874	2	142744587	0.000522253	373295	0.56	bladder cancer	TRUE	NA	NA	NA	NA	NA	NA	NA	1.63e-06	2	142744587	3408	39.04	TRUE	2	1	TRUE
CD45RA- CD28- CD8br AC	rs80012883	T	G	T	G	368.8	-0.000184782	0.0004	0.013749	FALSE	FALSE	FALSE	ieu-b-4874	13	94341740	0.000590898	373295	0.75	bladder cancer	TRUE	NA	NA	NA	NA	NA	NA	NA	2.59e-08	13	94341740	3408	66.09	TRUE	2	1	TRUE
CD45RA- CD28- CD8br AC	rs80036087	T	C	T	C	70.99	0.000223674	0.0084	0.06161	FALSE	FALSE	FALSE	ieu-b-4874	5	3678994	0.00031505	373295	0.48	bladder cancer	TRUE	NA	NA	NA	NA	NA	NA	NA	9.31e-07	5	3678994	3408	14.44	TRUE	2	1	TRUE
CD45RA- CD28- CD8br AC	rs80142250	T	C	T	C	128.8	0.00102605	0.0034	0.009791	FALSE	FALSE	FALSE	ieu-b-4874	13	110903174	0.000731773	373295	0.16	bladder cancer	TRUE	NA	NA	NA	NA	NA	NA	NA	6.54e-09	13	110903174	3408	22.13	TRUE	2	1	TRUE
CD45RA- CD28- CD8br AC	rs8056824	C	T	C	T	-177.9	-0.000288405	0.9984	0.984823	FALSE	FALSE	FALSE	ieu-b-4874	16	61800469	0.000564368	373295	0.61	bladder cancer	TRUE	NA	NA	NA	NA	NA	NA	NA	1.57e-07	16	61800469	3408	33.85	TRUE	2	1	TRUE
BAFF-R on IgD- CD38br	rs10071113	A	G	A	G	0.1861	8.45e-05	0.0925	0.078202	FALSE	FALSE	FALSE	ieu-b-4874	5	178512644	0.000252149	373295	0.74	bladder cancer	TRUE	NA	NA	NA	NA	NA	NA	NA	9.12e-06	5	178512644	3659	0.04188	TRUE	2	1	TRUE
BAFF-R on IgD- CD38br	rs139784925	T	C	T	C	-0.2552	-0.000401259	0.0571	0.029004	FALSE	FALSE	FALSE	ieu-b-4874	22	41079533	0.000415956	373295	0.33	bladder cancer	TRUE	NA	NA	NA	NA	NA	NA	NA	3.23e-06	22	41079533	3659	0.05474	TRUE	2	1	TRUE
BAFF-R on IgD- CD38br	rs146069723	T	C	T	C	-0.2315	-0.000702223	0.0756	0.013748	FALSE	FALSE	FALSE	ieu-b-4874	22	43339331	0.000594574	373295	0.24	bladder cancer	TRUE	NA	NA	NA	NA	NA	NA	NA	8.99e-07	22	43339331	3659	0.04704	TRUE	2	1	TRUE
BAFF-R on IgD- CD38br	rs147645513	T	C	T	C	-0.4405	0.000343826	0.0172	0.015287	FALSE	FALSE	FALSE	ieu-b-4874	7	32376606	0.000571308	373295	0.55	bladder cancer	TRUE	NA	NA	NA	NA	NA	NA	NA	5.09e-06	7	32376606	3659	0.09644	TRUE	2	1	TRUE
BAFF-R on IgD- CD38br	rs149192849	C	T	C	T	-0.3114	3.8e-05	0.0536	0.028998	FALSE	FALSE	FALSE	ieu-b-4874	22	42270864	0.000403174	373295	0.93	bladder cancer	TRUE	NA	NA	NA	NA	NA	NA	NA	1.35e-08	22	42270864	3659	0.0547	TRUE	2	1	TRUE
BAFF-R on IgD- CD38br	rs17828306	G	A	G	A	0.1256	2.26e-06	0.315	0.29482	FALSE	FALSE	FALSE	ieu-b-4874	4	62162828	0.00015288	373295	0.99	bladder cancer	TRUE	NA	NA	NA	NA	NA	NA	NA	2.37e-06	4	62162828	3659	0.02658	TRUE	2	1	TRUE
BAFF-R on IgD- CD38br	rs17878304	T	C	T	C	-0.3061	-0.00017115	0.0343	0.072645	FALSE	FALSE	FALSE	ieu-b-4874	19	4956161	0.000263676	373295	0.52	bladder cancer	TRUE	NA	NA	NA	NA	NA	NA	NA	4.98e-06	19	4956161	3659	0.06694	TRUE	2	1	TRUE
BAFF-R on IgD- CD38br	rs2479085	C	T	C	T	-0.1772	0.000159165	0.1271	0.080255	FALSE	FALSE	FALSE	ieu-b-4874	1	15667443	0.000248994	373295	0.52	bladder cancer	TRUE	NA	NA	NA	NA	NA	NA	NA	2.62e-06	1	15667443	3659	0.03766	TRUE	2	1	TRUE
BAFF-R on IgD- CD38br	rs4822134	C	T	C	T	0.1467	-5.58e-05	0.4057	0.413335	FALSE	FALSE	FALSE	ieu-b-4874	22	42867332	0.000137884	373295	0.69	bladder cancer	TRUE	NA	NA	NA	NA	NA	NA	NA	6.78e-09	22	42867332	3659	0.02525	TRUE	2	1	TRUE
BAFF-R on IgD- CD38br	rs561920	C	T	C	T	0.1358	0.000252582	0.221	0.206305	FALSE	FALSE	FALSE	ieu-b-4874	20	922125	0.00016696	373295	0.13	bladder cancer	TRUE	NA	NA	NA	NA	NA	NA	NA	4.49e-06	20	922125	3659	0.02955	TRUE	2	1	TRUE
BAFF-R on IgD- CD38br	rs643428	T	C	T	C	0.1106	0.000227672	0.4759	0.606585	FALSE	FALSE	FALSE	ieu-b-4874	1	54728858	0.000139123	373295	0.1	bladder cancer	TRUE	NA	NA	NA	NA	NA	NA	NA	6.91e-06	1	54728858	3659	0.02456	TRUE	2	1	TRUE
BAFF-R on IgD- CD38br	rs66717547	A	G	A	G	0.5147	-0.000237025	0.0118	0.046384	FALSE	FALSE	FALSE	ieu-b-4874	8	122963696	0.000340706	373295	0.49	bladder cancer	TRUE	NA	NA	NA	NA	NA	NA	NA	5.2e-06	8	122963696	3659	0.1128	TRUE	2	1	TRUE
BAFF-R on IgD- CD38br	rs73165129	T	C	T	C	-0.5288	4.67e-05	0.0991	0.079714	FALSE	FALSE	FALSE	ieu-b-4874	22	42315371	0.00024954	373295	0.85	bladder cancer	TRUE	NA	NA	NA	NA	NA	NA	NA	4.96e-38	22	42315371	3659	0.04055	TRUE	2	1	TRUE
BAFF-R on IgD- CD38br	rs73269620	C	T	C	T	-0.1197	2.88e-05	0.3773	0.274363	FALSE	FALSE	FALSE	ieu-b-4874	7	13273064	0.000153154	373295	0.85	bladder cancer	TRUE	NA	NA	NA	NA	NA	NA	NA	1.74e-06	7	13273064	3659	0.025	TRUE	2	1	TRUE
BAFF-R on IgD- CD38br	rs79868028	A	G	A	G	0.1897	0.000389806	0.0935	0.113378	FALSE	FALSE	FALSE	ieu-b-4874	10	133645848	0.00022405	373295	0.0819993	bladder cancer	TRUE	NA	NA	NA	NA	NA	NA	NA	8.44e-06	10	133645848	3659	0.04254	TRUE	2	1	TRUE
CD14 on CD14+ CD16+ monocyte	rs10071982	G	A	G	A	-0.1153	-6.06e-05	0.512	0.574608	FALSE	FALSE	FALSE	ieu-b-4874	5	62703251	0.00013794	373295	0.66	bladder cancer	TRUE	NA	NA	NA	NA	NA	NA	NA	3.92e-06	5	62703251	3618	0.02494	TRUE	2	1	TRUE
CD14 on CD14+ CD16+ monocyte	rs117306778	T	G	T	G	-0.2604	-1.61e-05	0.0485	0.056752	FALSE	FALSE	FALSE	ieu-b-4874	16	77769277	0.000295631	373295	0.96	bladder cancer	TRUE	NA	NA	NA	NA	NA	NA	NA	5.46e-06	16	77769277	3618	0.05719	TRUE	2	1	TRUE
CD14 on CD14+ CD16+ monocyte	rs12262055	T	C	T	C	-0.1408	-0.000227461	0.192	0.221894	FALSE	FALSE	FALSE	ieu-b-4874	10	7633337	0.000165329	373295	0.17	bladder cancer	TRUE	NA	NA	NA	NA	NA	NA	NA	7.12e-06	10	7633337	3618	0.03132	TRUE	2	1	TRUE
CD14 on CD14+ CD16+ monocyte	rs12593041	T	C	T	C	0.1733	2.9e-05	0.1238	0.161534	FALSE	FALSE	FALSE	ieu-b-4874	15	52443107	0.000184468	373295	0.87	bladder cancer	TRUE	NA	NA	NA	NA	NA	NA	NA	2.23e-06	15	52443107	3618	0.03657	TRUE	2	1	TRUE
CD14 on CD14+ CD16+ monocyte	rs13043397	T	C	T	C	0.1236	4.96e-05	0.3021	0.284597	FALSE	FALSE	FALSE	ieu-b-4874	20	42848689	0.00015081	373295	0.74	bladder cancer	TRUE	NA	NA	NA	NA	NA	NA	NA	3.82e-06	20	42848689	3618	0.0267	TRUE	2	1	TRUE
CD14 on CD14+ CD16+ monocyte	rs13248932	C	T	C	T	0.1727	0.000167831	0.1187	0.16399	FALSE	FALSE	FALSE	ieu-b-4874	8	58311929	0.000182701	373295	0.36	bladder cancer	TRUE	NA	NA	NA	NA	NA	NA	NA	4.55e-06	8	58311929	3618	0.03761	TRUE	2	1	TRUE
CD14 on CD14+ CD16+ monocyte	rs17111403	T	C	T	C	-0.237	0.000340377	0.0542	0.073708	FALSE	FALSE	FALSE	ieu-b-4874	14	41540685	0.00025871	373295	0.19	bladder cancer	TRUE	NA	NA	NA	NA	NA	NA	NA	9.34e-06	14	41540685	3618	0.05339	TRUE	2	1	TRUE
CD14 on CD14+ CD16+ monocyte	rs190803173	T	C	T	C	-0.3872	-0.000538376	0.0292	0.024649	FALSE	FALSE	FALSE	ieu-b-4874	6	378290	0.00052109	373295	0.3	bladder cancer	TRUE	NA	NA	NA	NA	NA	NA	NA	2.85e-06	6	378290	3618	0.08259	TRUE	2	1	TRUE
CD14 on CD14+ CD16+ monocyte	rs2569177	T	G	T	G	0.1645	-0.000212338	0.3057	0.288297	FALSE	FALSE	FALSE	ieu-b-4874	5	139992162	0.000149587	373295	0.16	bladder cancer	TRUE	NA	NA	NA	NA	NA	NA	NA	6.78e-10	5	139992162	3618	0.02658	TRUE	2	1	TRUE
CD14 on CD14+ CD16+ monocyte	rs26894	C	T	C	T	-0.1154	-0.000433513	0.391	0.291918	FALSE	FALSE	FALSE	ieu-b-4874	5	80417663	0.000149883	373295	0.00379997	bladder cancer	TRUE	NA	NA	NA	NA	NA	NA	NA	3.77e-06	5	80417663	3618	0.02491	TRUE	2	1	TRUE
CD14 on CD14+ CD16+ monocyte	rs4291738	T	G	T	G	0.2134	-6.15e-05	0.0896	0.049929	FALSE	FALSE	FALSE	ieu-b-4874	12	40611618	0.000313947	373295	0.84	bladder cancer	TRUE	NA	NA	NA	NA	NA	NA	NA	1.35e-06	12	40611618	3618	0.04407	TRUE	2	1	TRUE
CD14 on CD14+ CD16+ monocyte	rs61759062	G	T	G	T	0.1834	0.000162939	0.1136	0.208894	FALSE	FALSE	FALSE	ieu-b-4874	1	30558818	0.000167519	373295	0.33	bladder cancer	TRUE	NA	NA	NA	NA	NA	NA	NA	1.43e-06	1	30558818	3618	0.03799	TRUE	2	1	TRUE
CD14 on CD14+ CD16+ monocyte	rs61922057	T	C	T	C	-0.1893	8.02e-05	0.1003	0.118806	FALSE	FALSE	FALSE	ieu-b-4874	12	12505767	0.000209333	373295	0.7	bladder cancer	TRUE	NA	NA	NA	NA	NA	NA	NA	2.36e-06	12	12505767	3618	0.04005	TRUE	2	1	TRUE
CD14 on CD14+ CD16+ monocyte	rs62037895	G	A	G	A	-0.1502	-5.58e-05	0.1526	0.154893	FALSE	FALSE	FALSE	ieu-b-4874	15	31653646	0.000187543	373295	0.77	bladder cancer	TRUE	NA	NA	NA	NA	NA	NA	NA	9.62e-06	15	31653646	3618	0.03389	TRUE	2	1	TRUE
CD14 on CD14+ CD16+ monocyte	rs6671847	A	G	A	G	0.1769	-0.000257885	0.2995	0.50819	FALSE	FALSE	FALSE	ieu-b-4874	1	161478810	0.00013557	373295	0.0569994	bladder cancer	TRUE	NA	NA	NA	NA	NA	NA	NA	4.7e-11	1	161478810	3618	0.02681	TRUE	2	1	TRUE
CD14 on CD14+ CD16+ monocyte	rs71586370	C	T	C	T	-0.7623	0.000328046	0.0058	0.012282	FALSE	FALSE	FALSE	ieu-b-4874	5	102625786	0.000626446	373295	0.6	bladder cancer	TRUE	NA	NA	NA	NA	NA	NA	NA	3.06e-06	5	102625786	3618	0.1631	TRUE	2	1	TRUE
CD14 on CD14+ CD16+ monocyte	rs9406865	T	A	T	A	-0.2387	-0.000439509	0.0575	0.109029	FALSE	TRUE	FALSE	ieu-b-4874	9	25219707	0.000217142	373295	0.0430002	bladder cancer	TRUE	NA	NA	NA	NA	NA	NA	NA	4.44e-06	9	25219707	3618	0.05194	TRUE	2	1	TRUE
CD20 on IgD+ CD38dim	rs1007337	T	C	T	C	-0.1389	6.99e-05	0.6024	0.679946	FALSE	FALSE	FALSE	ieu-b-4874	22	39781585	0.000145301	373295	0.630001	bladder cancer	TRUE	NA	NA	NA	NA	NA	NA	NA	3.34e-08	22	39781585	3657	0.02509	TRUE	2	1	TRUE
CD20 on IgD+ CD38dim	rs111741355	A	G	A	G	-2.608	0.00028845	0.0004	0.025243	FALSE	FALSE	FALSE	ieu-b-4874	1	48095312	0.000463834	373295	0.53	bladder cancer	TRUE	NA	NA	NA	NA	NA	NA	NA	4.54e-06	1	48095312	3657	0.5679	TRUE	2	1	TRUE
CD20 on IgD+ CD38dim	rs11230624	C	G	C	G	-0.1726	0.000251379	0.1263	0.101976	FALSE	TRUE	FALSE	ieu-b-4874	11	60952231	0.000230763	373295	0.28	bladder cancer	TRUE	NA	NA	NA	NA	NA	NA	NA	3.94e-06	11	60952231	3657	0.03735	TRUE	2	1	TRUE
CD20 on IgD+ CD38dim	rs11242780	C	G	C	G	0.1768	-1.38e-05	0.105	0.230808	FALSE	TRUE	FALSE	ieu-b-4874	6	2511559	0.000160398	373295	0.93	bladder cancer	TRUE	NA	NA	NA	NA	NA	NA	NA	9.76e-06	6	2511559	3657	0.03993	TRUE	2	1	TRUE
CD20 on IgD+ CD38dim	rs113371046	A	G	A	G	0.2316	-0.000248308	0.0639	0.057605	FALSE	FALSE	FALSE	ieu-b-4874	1	17595034	0.000292536	373295	0.4	bladder cancer	TRUE	NA	NA	NA	NA	NA	NA	NA	4.76e-06	1	17595034	3657	0.05055	TRUE	2	1	TRUE
CD20 on IgD+ CD38dim	rs12042193	G	A	G	A	-0.1223	-7.22e-05	0.3687	0.514416	FALSE	FALSE	FALSE	ieu-b-4874	1	116031657	0.000136328	373295	0.6	bladder cancer	TRUE	NA	NA	NA	NA	NA	NA	NA	2.05e-06	1	116031657	3657	0.02571	TRUE	2	1	TRUE
CD20 on IgD+ CD38dim	rs12120358	T	A	T	A	-0.133	-1.39e-05	0.2234	0.399306	FALSE	TRUE	FALSE	ieu-b-4874	1	161444369	0.000139262	373295	0.92	bladder cancer	TRUE	NA	NA	NA	NA	NA	NA	NA	7.3e-06	1	161444369	3657	0.02962	TRUE	2	1	TRUE
CD20 on IgD+ CD38dim	rs12282477	A	T	A	T	-0.2837	8.67e-05	0.0383	0.06767	FALSE	TRUE	FALSE	ieu-b-4874	11	90976338	0.000269841	373295	0.75	bladder cancer	TRUE	NA	NA	NA	NA	NA	NA	NA	9.78e-06	11	90976338	3657	0.06407	TRUE	2	1	TRUE
CD20 on IgD+ CD38dim	rs1306395	C	T	C	T	0.1157	-6.03e-05	0.5145	0.429603	FALSE	FALSE	FALSE	ieu-b-4874	2	61076272	0.000136464	373295	0.66	bladder cancer	TRUE	NA	NA	NA	NA	NA	NA	NA	4.87e-06	2	61076272	3657	0.02527	TRUE	2	1	TRUE
CD20 on IgD+ CD38dim	rs17616173	G	A	G	A	-0.2744	0.000290933	0.0438	0.130358	FALSE	FALSE	FALSE	ieu-b-4874	15	86986287	0.000201477	373295	0.15	bladder cancer	TRUE	NA	NA	NA	NA	NA	NA	NA	5.44e-06	15	86986287	3657	0.06027	TRUE	2	1	TRUE
CD20 on IgD+ CD38dim	rs17763050	A	G	A	G	0.1424	6.03e-05	0.2901	0.224478	FALSE	FALSE	FALSE	ieu-b-4874	17	43903336	0.000161985	373295	0.709999	bladder cancer	TRUE	NA	NA	NA	NA	NA	NA	NA	6.43e-07	17	43903336	3657	0.02857	TRUE	2	1	TRUE
CD20 on IgD+ CD38dim	rs187747283	G	T	G	T	-0.165	-0.000635323	0.1374	0.016261	FALSE	FALSE	FALSE	ieu-b-4874	5	56487565	0.000551875	373295	0.25	bladder cancer	TRUE	NA	NA	NA	NA	NA	NA	NA	6.06e-06	5	56487565	3657	0.03641	TRUE	2	1	TRUE
CD20 on IgD+ CD38dim	rs2066399	A	G	A	G	0.2375	-2.22e-06	0.821	0.81843	FALSE	FALSE	FALSE	ieu-b-4874	6	15880540	0.00017558	373295	0.99	bladder cancer	TRUE	NA	NA	NA	NA	NA	NA	NA	1.75e-13	6	15880540	3657	0.03213	TRUE	2	1	TRUE
CD20 on IgD+ CD38dim	rs233493	A	G	A	G	-0.1263	8.93e-05	0.6339	0.610702	FALSE	FALSE	FALSE	ieu-b-4874	6	14804334	0.000140292	373295	0.52	bladder cancer	TRUE	NA	NA	NA	NA	NA	NA	NA	8.65e-07	6	14804334	3657	0.02563	TRUE	2	1	TRUE
CD20 on IgD+ CD38dim	rs34486765	A	G	A	G	0.167	-0.00017032	0.3094	0.208549	FALSE	FALSE	FALSE	ieu-b-4874	19	49915911	0.000167553	373295	0.31	bladder cancer	TRUE	NA	NA	NA	NA	NA	NA	NA	2.9e-10	19	49915911	3657	0.02642	TRUE	2	1	TRUE
CD20 on IgD+ CD38dim	rs388354	C	A	C	A	-0.1329	0.000406294	0.5205	0.590721	FALSE	FALSE	FALSE	ieu-b-4874	7	40190449	0.000137838	373295	0.0032	bladder cancer	TRUE	NA	NA	NA	NA	NA	NA	NA	5.39e-08	7	40190449	3657	0.02439	TRUE	2	1	TRUE
CD20 on IgD+ CD38dim	rs55643835	T	C	T	C	-0.2506	0.000454477	0.0567	0.088778	FALSE	FALSE	FALSE	ieu-b-4874	6	33947909	0.000237973	373295	0.0560003	bladder cancer	TRUE	NA	NA	NA	NA	NA	NA	NA	3.7e-06	6	33947909	3657	0.05406	TRUE	2	1	TRUE
CD20 on IgD+ CD38dim	rs61731791	T	C	T	C	0.2071	-0.000148005	0.0972	0.041142	FALSE	FALSE	FALSE	ieu-b-4874	19	50940778	0.00034065	373295	0.66	bladder cancer	TRUE	NA	NA	NA	NA	NA	NA	NA	9.99e-07	19	50940778	3657	0.04225	TRUE	2	1	TRUE
CD20 on IgD+ CD38dim	rs72836542	T	C	T	C	0.1752	-0.000159869	0.3161	0.283559	FALSE	FALSE	FALSE	ieu-b-4874	6	14091682	0.000150141	373295	0.29	bladder cancer	TRUE	NA	NA	NA	NA	NA	NA	NA	7.2e-11	6	14091682	3657	0.0268	TRUE	2	1	TRUE
CD20 on IgD+ CD38dim	rs73086355	A	C	A	C	-0.2878	2.64e-05	0.0432	0.083904	FALSE	FALSE	FALSE	ieu-b-4874	20	11850850	0.000246365	373295	0.91	bladder cancer	TRUE	NA	NA	NA	NA	NA	NA	NA	1.74e-06	20	11850850	3657	0.06009	TRUE	2	1	TRUE
CD20 on IgD+ CD38dim	rs73154503	C	T	C	T	-0.2133	4.16e-05	0.0886	0.05945	FALSE	FALSE	FALSE	ieu-b-4874	3	159871677	0.000287329	373295	0.88	bladder cancer	TRUE	NA	NA	NA	NA	NA	NA	NA	8.55e-07	3	159871677	3657	0.04326	TRUE	2	1	TRUE
CD20 on IgD+ CD38dim	rs7404890	A	G	A	G	0.1788	0.000193201	0.8208	0.765701	FALSE	FALSE	FALSE	ieu-b-4874	16	11007193	0.000160271	373295	0.23	bladder cancer	TRUE	NA	NA	NA	NA	NA	NA	NA	4.23e-08	16	11007193	3657	0.03256	TRUE	2	1	TRUE
CD20 on IgD+ CD38dim	rs76355582	C	G	C	G	0.2445	-0.000523679	0.0551	0.031307	FALSE	TRUE	FALSE	ieu-b-4874	7	119197741	0.000389542	373295	0.18	bladder cancer	TRUE	NA	NA	NA	NA	NA	NA	NA	4.54e-06	7	119197741	3657	0.05325	TRUE	2	1	TRUE
CD20 on IgD+ CD38dim	rs77612075	T	C	T	C	0.3469	0.00023571	0.0293	0.059432	FALSE	FALSE	FALSE	ieu-b-4874	5	162820460	0.000289636	373295	0.42	bladder cancer	TRUE	NA	NA	NA	NA	NA	NA	NA	1.36e-06	5	162820460	3657	0.07169	TRUE	2	1	TRUE
CD20 on IgD+ CD38dim	rs8025257	C	T	C	T	-0.1337	-0.000236667	0.2286	0.174635	FALSE	FALSE	FALSE	ieu-b-4874	15	89600226	0.000178344	373295	0.18	bladder cancer	TRUE	NA	NA	NA	NA	NA	NA	NA	5.4e-06	15	89600226	3657	0.02934	TRUE	2	1	TRUE
CD20 on IgD+ CD38dim	rs9267484	T	A	T	A	0.187	0.00115359	0.1739	0.01609	FALSE	TRUE	FALSE	ieu-b-4874	6	31505724	0.000537284	373295	0.032	bladder cancer	TRUE	NA	NA	NA	NA	NA	NA	NA	9.49e-07	6	31505724	3657	0.03809	TRUE	2	1	TRUE
CD20 on IgD+ CD38dim	rs9270560	C	T	C	T	-0.2177	-6.51e-06	0.5889	0.629933	FALSE	FALSE	FALSE	ieu-b-4874	6	32577814	0.000146898	373295	0.96	bladder cancer	TRUE	TRUE	rs9270560	rs673002	T	C	G	T	2.13e-13	6	32560741	3657	0.02955	TRUE	2	1	TRUE
CD20 on IgD+ CD24-	rs1007337	T	C	T	C	-0.1254	6.99e-05	0.6024	0.679946	FALSE	FALSE	FALSE	ieu-b-4874	22	39781585	0.000145301	373295	0.630001	bladder cancer	TRUE	NA	NA	NA	NA	NA	NA	NA	6.28e-07	22	39781585	3657	0.02513	TRUE	2	1	TRUE
CD20 on IgD+ CD24-	rs11051833	T	C	T	C	-0.3439	-0.000123194	0.0286	0.084668	FALSE	FALSE	FALSE	ieu-b-4874	12	32341983	0.000243541	373295	0.61	bladder cancer	TRUE	TRUE	rs11051833	rs78159741	T	C	C	G	3.28e-06	12	32330242	3657	0.07379	TRUE	2	1	TRUE
CD20 on IgD+ CD24-	rs11083972	G	C	G	C	-0.155	-2.24e-05	0.2234	0.235193	FALSE	TRUE	FALSE	ieu-b-4874	19	49896752	0.000159998	373295	0.89	bladder cancer	TRUE	NA	NA	NA	NA	NA	NA	NA	2.41e-07	19	49896752	3657	0.02995	TRUE	2	1	TRUE
CD20 on IgD+ CD24-	rs111741355	A	G	A	G	-2.647	0.00028845	0.0004	0.025243	FALSE	FALSE	FALSE	ieu-b-4874	1	48095312	0.000463834	373295	0.53	bladder cancer	TRUE	NA	NA	NA	NA	NA	NA	NA	3.67e-06	1	48095312	3657	0.5709	TRUE	2	1	TRUE
CD20 on IgD+ CD24-	rs113371046	A	G	A	G	0.2407	-0.000248308	0.0639	0.057605	FALSE	FALSE	FALSE	ieu-b-4874	1	17595034	0.000292536	373295	0.4	bladder cancer	TRUE	NA	NA	NA	NA	NA	NA	NA	2.06e-06	1	17595034	3657	0.05062	TRUE	2	1	TRUE
CD20 on IgD+ CD24-	rs2066399	A	G	A	G	0.2255	-2.22e-06	0.821	0.81843	FALSE	FALSE	FALSE	ieu-b-4874	6	15880540	0.00017558	373295	0.99	bladder cancer	TRUE	NA	NA	NA	NA	NA	NA	NA	2.95e-12	6	15880540	3657	0.03219	TRUE	2	1	TRUE
CD20 on IgD+ CD24-	rs233495	T	C	T	C	-0.124	6.87e-05	0.5585	0.523626	FALSE	FALSE	FALSE	ieu-b-4874	6	14806317	0.000135701	373295	0.61	bladder cancer	TRUE	NA	NA	NA	NA	NA	NA	NA	5.9e-07	6	14806317	3657	0.02479	TRUE	2	1	TRUE
CD20 on IgD+ CD24-	rs388354	C	A	C	A	-0.1327	0.000406294	0.5205	0.590721	FALSE	FALSE	FALSE	ieu-b-4874	7	40190449	0.000137838	373295	0.0032	bladder cancer	TRUE	NA	NA	NA	NA	NA	NA	NA	5.71e-08	7	40190449	3657	0.0244	TRUE	2	1	TRUE
CD20 on IgD+ CD24-	rs55643835	T	C	T	C	-0.2783	0.000454477	0.0567	0.088778	FALSE	FALSE	FALSE	ieu-b-4874	6	33947909	0.000237973	373295	0.0560003	bladder cancer	TRUE	NA	NA	NA	NA	NA	NA	NA	2.67e-07	6	33947909	3657	0.05397	TRUE	2	1	TRUE
CD20 on IgD+ CD24-	rs56132967	T	G	T	G	-0.3532	-0.000286832	0.0258	0.065305	FALSE	FALSE	FALSE	ieu-b-4874	14	61644977	0.000275016	373295	0.3	bladder cancer	TRUE	NA	NA	NA	NA	NA	NA	NA	5.92e-06	14	61644977	3657	0.07788	TRUE	2	1	TRUE
CD20 on IgD+ CD24-	rs6443362	T	C	T	C	0.1113	-7.49e-05	0.4837	0.474802	FALSE	FALSE	FALSE	ieu-b-4874	3	176369881	0.000135681	373295	0.58	bladder cancer	TRUE	NA	NA	NA	NA	NA	NA	NA	6.29e-06	3	176369881	3657	0.02461	TRUE	2	1	TRUE
CD20 on IgD+ CD24-	rs6496328	T	C	T	C	-0.2998	0.000309194	0.0387	0.130938	FALSE	FALSE	FALSE	ieu-b-4874	15	86988686	0.00020052	373295	0.12	bladder cancer	TRUE	NA	NA	NA	NA	NA	NA	NA	2.31e-06	15	86988686	3657	0.06337	TRUE	2	1	TRUE
CD20 on IgD+ CD24-	rs72836542	T	C	T	C	0.1645	-0.000159869	0.3161	0.283559	FALSE	FALSE	FALSE	ieu-b-4874	6	14091682	0.000150141	373295	0.29	bladder cancer	TRUE	NA	NA	NA	NA	NA	NA	NA	9.87e-10	6	14091682	3657	0.02685	TRUE	2	1	TRUE
CD20 on IgD+ CD24-	rs73086355	A	C	A	C	-0.2701	2.64e-05	0.0432	0.083904	FALSE	FALSE	FALSE	ieu-b-4874	20	11850850	0.000246365	373295	0.91	bladder cancer	TRUE	NA	NA	NA	NA	NA	NA	NA	7.32e-06	20	11850850	3657	0.06014	TRUE	2	1	TRUE
CD20 on IgD+ CD24-	rs73245560	C	T	C	T	0.4287	-0.000262204	0.0182	0.039848	FALSE	FALSE	FALSE	ieu-b-4874	4	43987474	0.0003485	373295	0.450001	bladder cancer	TRUE	NA	NA	NA	NA	NA	NA	NA	3.74e-06	4	43987474	3657	0.09254	TRUE	2	1	TRUE
CD20 on IgD+ CD24-	rs7404890	A	G	A	G	0.1749	0.000193201	0.8208	0.765701	FALSE	FALSE	FALSE	ieu-b-4874	16	11007193	0.000160271	373295	0.23	bladder cancer	TRUE	NA	NA	NA	NA	NA	NA	NA	8.42e-08	16	11007193	3657	0.03258	TRUE	2	1	TRUE
CD20 on IgD+ CD24-	rs80155794	A	G	A	G	-0.3388	-0.000252807	0.0267	0.069001	FALSE	FALSE	FALSE	ieu-b-4874	5	178957291	0.000269354	373295	0.35	bladder cancer	TRUE	NA	NA	NA	NA	NA	NA	NA	4.88e-06	5	178957291	3657	0.07403	TRUE	2	1	TRUE
CD20 on IgD+ CD24-	rs8025257	C	T	C	T	-0.1349	-0.000236667	0.2286	0.174635	FALSE	FALSE	FALSE	ieu-b-4874	15	89600226	0.000178344	373295	0.18	bladder cancer	TRUE	NA	NA	NA	NA	NA	NA	NA	4.5e-06	15	89600226	3657	0.02937	TRUE	2	1	TRUE
CD20 on IgD+ CD24-	rs842631	T	C	T	C	0.1195	-5.91e-05	0.5088	0.429125	FALSE	FALSE	FALSE	ieu-b-4874	2	61085723	0.000136431	373295	0.66	bladder cancer	TRUE	NA	NA	NA	NA	NA	NA	NA	2.39e-06	2	61085723	3657	0.02528	TRUE	2	1	TRUE
CD20 on IgD+ CD24-	rs9270560	C	T	C	T	-0.1682	-6.51e-06	0.5889	0.629933	FALSE	FALSE	FALSE	ieu-b-4874	6	32577814	0.000146898	373295	0.96	bladder cancer	TRUE	TRUE	rs9270560	rs673002	T	C	G	T	1.31e-08	6	32560741	3657	0.02952	TRUE	2	1	TRUE
CD38 on naive-mature B cell	rs10073475	C	T	C	T	-0.1209	-3.74e-05	0.5953	0.558448	FALSE	FALSE	FALSE	ieu-b-4874	5	77504427	0.000136309	373295	0.780001	bladder cancer	TRUE	NA	NA	NA	NA	NA	NA	NA	2.22e-06	5	77504427	3656	0.02551	TRUE	2	1	TRUE
CD38 on naive-mature B cell	rs10737766	T	A	T	A	-0.1395	0.000142409	0.1968	0.089401	FALSE	TRUE	FALSE	ieu-b-4874	1	116770543	0.00023709	373295	0.55	bladder cancer	TRUE	TRUE	rs10737766	rs10802172	T	A	G	C	5.65e-06	1	116770372	3656	0.03069	TRUE	2	1	TRUE
CD38 on naive-mature B cell	rs11042077	A	G	A	G	0.1217	-0.000196959	0.4943	0.64935	FALSE	FALSE	FALSE	ieu-b-4874	11	8825966	0.000142313	373295	0.17	bladder cancer	TRUE	NA	NA	NA	NA	NA	NA	NA	1.27e-06	11	8825966	3656	0.02507	TRUE	2	1	TRUE
CD38 on naive-mature B cell	rs112236163	G	A	G	A	0.1589	7.04e-05	0.2246	0.211114	FALSE	FALSE	FALSE	ieu-b-4874	18	51428440	0.000165646	373295	0.67	bladder cancer	TRUE	NA	NA	NA	NA	NA	NA	NA	2.42e-07	18	51428440	3656	0.03072	TRUE	2	1	TRUE
CD38 on naive-mature B cell	rs115062208	G	A	G	A	-0.7874	-0.000575905	0.0115	0.018797	FALSE	FALSE	FALSE	ieu-b-4874	4	15956227	0.000508915	373295	0.26	bladder cancer	TRUE	NA	NA	NA	NA	NA	NA	NA	5.48e-11	4	15956227	3656	0.1197	TRUE	2	1	TRUE
CD38 on naive-mature B cell	rs11853686	A	T	A	T	0.1687	-0.000248548	0.875	0.808264	FALSE	TRUE	FALSE	ieu-b-4874	15	24189965	0.000172543	373295	0.15	bladder cancer	TRUE	TRUE	rs11853686	rs11858308	T	A	C	T	5.82e-06	15	24189756	3656	0.03716	TRUE	2	1	TRUE
CD38 on naive-mature B cell	rs12032479	T	C	T	C	-0.1719	7.02e-06	0.1797	0.245358	FALSE	FALSE	FALSE	ieu-b-4874	1	194997589	0.000157723	373295	0.96	bladder cancer	TRUE	NA	NA	NA	NA	NA	NA	NA	1.4e-07	1	194997589	3656	0.03259	TRUE	2	1	TRUE
CD38 on naive-mature B cell	rs12428439	G	T	G	T	0.1203	-0.000123562	0.407	0.388363	FALSE	FALSE	FALSE	ieu-b-4874	13	59808190	0.000138876	373295	0.37	bladder cancer	TRUE	NA	NA	NA	NA	NA	NA	NA	2.01e-06	13	59808190	3656	0.02527	TRUE	2	1	TRUE
CD38 on naive-mature B cell	rs12435334	A	C	A	C	0.1145	-4.73e-06	0.4428	0.437301	FALSE	FALSE	FALSE	ieu-b-4874	14	38169407	0.00013639	373295	0.97	bladder cancer	TRUE	NA	NA	NA	NA	NA	NA	NA	6.77e-06	14	38169407	3656	0.0254	TRUE	2	1	TRUE
CD38 on naive-mature B cell	rs13118578	G	T	G	T	-0.5411	0.000575096	0.0108	0.033008	FALSE	FALSE	FALSE	ieu-b-4874	4	26202275	0.000391143	373295	0.14	bladder cancer	TRUE	NA	NA	NA	NA	NA	NA	NA	7.68e-06	4	26202275	3656	0.1208	TRUE	2	1	TRUE
CD38 on naive-mature B cell	rs139476939	C	T	C	T	0.6239	0.000247744	0.0072	0.01111	FALSE	FALSE	FALSE	ieu-b-4874	2	28422630	0.000652454	373295	0.7	bladder cancer	TRUE	NA	NA	NA	NA	NA	NA	NA	9.47e-06	2	28422630	3656	0.1407	TRUE	2	1	TRUE
CD38 on naive-mature B cell	rs146407097	A	G	A	G	-0.2522	0.000118492	0.0613	0.09419	FALSE	FALSE	FALSE	ieu-b-4874	9	34935516	0.000235426	373295	0.61	bladder cancer	TRUE	NA	NA	NA	NA	NA	NA	NA	1.89e-06	9	34935516	3656	0.05285	TRUE	2	1	TRUE
CD38 on naive-mature B cell	rs34893127	G	A	G	A	-0.135	1.85e-05	0.2103	0.231667	FALSE	FALSE	FALSE	ieu-b-4874	5	67123177	0.000161497	373295	0.91	bladder cancer	TRUE	NA	NA	NA	NA	NA	NA	NA	9.15e-06	5	67123177	3656	0.0304	TRUE	2	1	TRUE
CD38 on naive-mature B cell	rs572542	T	C	T	C	-0.3966	-0.000336869	0.0289	0.026388	FALSE	FALSE	FALSE	ieu-b-4874	4	14029370	0.000421308	373295	0.42	bladder cancer	TRUE	NA	NA	NA	NA	NA	NA	NA	5.3e-08	4	14029370	3656	0.07274	TRUE	2	1	TRUE
CD38 on naive-mature B cell	rs6895789	T	C	T	C	-0.1662	-0.000168678	0.1533	0.117068	FALSE	FALSE	FALSE	ieu-b-4874	5	91363908	0.00021313	373295	0.43	bladder cancer	TRUE	NA	NA	NA	NA	NA	NA	NA	1.72e-06	5	91363908	3656	0.03469	TRUE	2	1	TRUE
CD38 on naive-mature B cell	rs72715691	T	A	T	A	-0.4876	-0.000923358	0.0131	0.040585	FALSE	TRUE	FALSE	ieu-b-4874	9	15034791	0.000375217	373295	0.0140001	bladder cancer	TRUE	NA	NA	NA	NA	NA	NA	NA	6.71e-06	9	15034791	3656	0.1081	TRUE	2	1	TRUE
CD38 on naive-mature B cell	rs73012119	G	T	G	T	0.1902	-6.08e-05	0.1028	0.132315	FALSE	FALSE	FALSE	ieu-b-4874	6	158951309	0.000201358	373295	0.760001	bladder cancer	TRUE	TRUE	rs73012119	rs73012121	G	T	A	C	6.08e-06	6	158951296	3656	0.04198	TRUE	2	1	TRUE
CD38 on naive-mature B cell	rs753875	C	T	C	T	0.404	-2.2e-05	0.0205	0.016582	FALSE	FALSE	FALSE	ieu-b-4874	6	170583341	0.000541517	373295	0.97	bladder cancer	TRUE	NA	NA	NA	NA	NA	NA	NA	6.73e-06	6	170583341	3656	0.08961	TRUE	2	1	TRUE
CD38 on naive-mature B cell	rs7579256	T	C	T	C	0.2748	-0.000147085	0.0413	0.072962	FALSE	FALSE	FALSE	ieu-b-4874	2	36938218	0.000262074	373295	0.57	bladder cancer	TRUE	NA	NA	NA	NA	NA	NA	NA	9.14e-06	2	36938218	3656	0.06185	TRUE	2	1	TRUE
CD38 on naive-mature B cell	rs76112278	A	G	A	G	-0.8747	-0.000439755	0.0194	0.015532	FALSE	FALSE	FALSE	ieu-b-4874	4	15915069	0.000576551	373295	0.450001	bladder cancer	TRUE	NA	NA	NA	NA	NA	NA	NA	1.76e-22	4	15915069	3656	0.08908	TRUE	2	1	TRUE
CD38 on naive-mature B cell	rs76209777	G	A	G	A	-0.2112	-1.96e-05	0.0726	0.076804	FALSE	FALSE	FALSE	ieu-b-4874	8	1277613	0.000254861	373295	0.94	bladder cancer	TRUE	NA	NA	NA	NA	NA	NA	NA	9.84e-06	8	1277613	3656	0.04772	TRUE	2	1	TRUE
CD38 on naive-mature B cell	rs76354299	A	G	A	G	-0.4181	-3.99e-06	0.0321	0.036664	FALSE	FALSE	FALSE	ieu-b-4874	4	15037408	0.000366643	373295	0.99	bladder cancer	TRUE	NA	NA	NA	NA	NA	NA	NA	1.66e-09	4	15037408	3656	0.06918	TRUE	2	1	TRUE
CD38 on naive-mature B cell	rs78026509	G	C	G	C	-0.1433	-0.00019342	0.2493	0.076594	FALSE	TRUE	FALSE	ieu-b-4874	6	30074310	0.000257068	373295	0.450001	bladder cancer	TRUE	NA	NA	NA	NA	NA	NA	NA	3.96e-06	6	30074310	3656	0.031	TRUE	2	1	TRUE
CD38 on naive-mature B cell	rs78111008	C	T	C	T	-0.7397	-0.000840029	0.0063	0.027482	FALSE	FALSE	FALSE	ieu-b-4874	20	12142943	0.000416701	373295	0.0439997	bladder cancer	TRUE	NA	NA	NA	NA	NA	NA	NA	4.52e-06	20	12142943	3656	0.161	TRUE	2	1	TRUE
CD38 on naive-mature B cell	rs9599916	G	A	G	A	0.1379	0.000110428	0.2291	0.283189	FALSE	FALSE	FALSE	ieu-b-4874	13	72594895	0.000150626	373295	0.46	bladder cancer	TRUE	NA	NA	NA	NA	NA	NA	NA	3.14e-06	13	72594895	3656	0.02955	TRUE	2	1	TRUE
IgD on IgD+ CD24+	rs10076053	A	G	A	G	0.6192	-0.000186901	0.0092	0.033957	FALSE	FALSE	FALSE	ieu-b-4874	5	150649861	0.000372944	373295	0.62	bladder cancer	TRUE	NA	NA	NA	NA	NA	NA	NA	1.44e-06	5	150649861	3656	0.1283	TRUE	2	1	TRUE
IgD on IgD+ CD24+	rs112421400	T	C	T	C	-0.1982	0.000375144	0.2101	0.049876	FALSE	FALSE	FALSE	ieu-b-4874	6	28205826	0.000310817	373295	0.23	bladder cancer	TRUE	NA	NA	NA	NA	NA	NA	NA	1.7e-08	6	28205826	3656	0.03505	TRUE	2	1	TRUE
IgD on IgD+ CD24+	rs11621990	T	C	T	C	-0.2438	0.000139476	0.4199	0.39476	FALSE	FALSE	FALSE	ieu-b-4874	14	106875768	0.000177517	373295	0.43	bladder cancer	TRUE	NA	NA	NA	NA	NA	NA	NA	2.68e-08	14	106875768	3656	0.04375	TRUE	2	1	TRUE
IgD on IgD+ CD24+	rs1181899	C	T	C	T	0.1826	-0.00010548	0.8967	0.856934	FALSE	FALSE	FALSE	ieu-b-4874	7	76993184	0.00019367	373295	0.59	bladder cancer	TRUE	NA	NA	NA	NA	NA	NA	NA	8.45e-06	7	76993184	3656	0.04095	TRUE	2	1	TRUE
IgD on IgD+ CD24+	rs12505403	A	G	A	G	0.212	1.57e-05	0.1156	0.11132	FALSE	FALSE	FALSE	ieu-b-4874	4	130367811	0.000217339	373295	0.94	bladder cancer	TRUE	NA	NA	NA	NA	NA	NA	NA	8.11e-08	4	130367811	3656	0.03944	TRUE	2	1	TRUE
IgD on IgD+ CD24+	rs139084170	A	C	A	C	0.3593	-0.000711629	0.052	0.014766	FALSE	FALSE	FALSE	ieu-b-4874	6	43351686	0.000585244	373295	0.22	bladder cancer	TRUE	NA	NA	NA	NA	NA	NA	NA	5.51e-10	6	43351686	3656	0.05776	TRUE	2	1	TRUE
IgD on IgD+ CD24+	rs144583907	G	A	G	A	0.263	-0.000989274	0.0472	0.01479	FALSE	FALSE	FALSE	ieu-b-4874	2	217837059	0.000565665	373295	0.08	bladder cancer	TRUE	NA	NA	NA	NA	NA	NA	NA	8.48e-06	2	217837059	3656	0.05897	TRUE	2	1	TRUE
IgD on IgD+ CD24+	rs147051683	G	C	G	C	-0.6814	-0.000240488	0.0071	0.017922	FALSE	TRUE	FALSE	ieu-b-4874	1	170103711	0.000522912	373295	0.649999	bladder cancer	TRUE	NA	NA	NA	NA	NA	NA	NA	7.8e-06	1	170103711	3656	0.1522	TRUE	2	1	TRUE
IgD on IgD+ CD24+	rs147854460	A	T	A	T	0.7291	-0.000320904	0.0067	0.018527	FALSE	TRUE	FALSE	ieu-b-4874	6	143010177	0.000505511	373295	0.53	bladder cancer	TRUE	NA	NA	NA	NA	NA	NA	NA	9.91e-07	6	143010177	3656	0.1487	TRUE	2	1	TRUE
IgD on IgD+ CD24+	rs151050474	A	G	A	G	0.4701	0.00048812	0.0163	0.042925	FALSE	FALSE	FALSE	ieu-b-4874	19	57875874	0.000335115	373295	0.15	bladder cancer	TRUE	NA	NA	NA	NA	NA	NA	NA	7.4e-07	19	57875874	3656	0.0948	TRUE	2	1	TRUE
IgD on IgD+ CD24+	rs1794511	G	T	G	T	-0.2439	0.000126055	0.2594	0.144609	FALSE	FALSE	FALSE	ieu-b-4874	6	32671207	0.000192742	373295	0.51	bladder cancer	TRUE	NA	NA	NA	NA	NA	NA	NA	6.87e-13	6	32671207	3656	0.03383	TRUE	2	1	TRUE
IgD on IgD+ CD24+	rs2630640	A	C	A	C	0.1157	1.19e-07	0.6265	0.460832	FALSE	FALSE	FALSE	ieu-b-4874	17	68538485	0.000135692	373295	1	bladder cancer	TRUE	NA	NA	NA	NA	NA	NA	NA	9.12e-06	17	68538485	3656	0.02605	TRUE	2	1	TRUE
IgD on IgD+ CD24+	rs2819455	C	G	C	G	0.2689	0.00011867	0.0952	0.144704	FALSE	TRUE	FALSE	ieu-b-4874	14	105445412	0.000204513	373295	0.56	bladder cancer	TRUE	NA	NA	NA	NA	NA	NA	NA	1.38e-10	14	105445412	3656	0.04177	TRUE	2	1	TRUE
IgD on IgD+ CD24+	rs4796030	C	A	C	A	0.1187	0.000230894	0.658	0.571311	FALSE	FALSE	FALSE	ieu-b-4874	17	33353332	0.000136668	373295	0.0909997	bladder cancer	TRUE	TRUE	rs4796030	rs3926358	A	C	T	C	7.55e-06	17	33330150	3656	0.02647	TRUE	2	1	TRUE
IgD on IgD+ CD24+	rs55675835	A	G	A	G	0.3325	-0.000220434	0.031	0.035064	FALSE	FALSE	FALSE	ieu-b-4874	12	210957	0.000369671	373295	0.55	bladder cancer	TRUE	NA	NA	NA	NA	NA	NA	NA	3.42e-06	12	210957	3656	0.0715	TRUE	2	1	TRUE
IgD on IgD+ CD24+	rs58259062	C	T	C	T	0.401	-0.000517572	0.0274	0.019726	FALSE	FALSE	FALSE	ieu-b-4874	14	107284188	0.000487994	373295	0.29	bladder cancer	TRUE	NA	NA	NA	NA	NA	NA	NA	4.03e-07	14	107284188	3656	0.07898	TRUE	2	1	TRUE
IgD on IgD+ CD24+	rs709589	T	C	T	C	-0.6123	-0.000124178	0.4558	0.484123	FALSE	FALSE	FALSE	ieu-b-4874	14	106306841	0.000163475	373295	0.450001	bladder cancer	TRUE	NA	NA	NA	NA	NA	NA	NA	4.42e-87	14	106306841	3656	0.03013	TRUE	2	1	TRUE
IgD on IgD+ CD24+	rs72871227	T	C	T	C	-0.1198	0.000185774	0.3189	0.184129	FALSE	FALSE	FALSE	ieu-b-4874	2	151000647	0.000175359	373295	0.29	bladder cancer	TRUE	NA	NA	NA	NA	NA	NA	NA	6.51e-06	2	151000647	3656	0.02654	TRUE	2	1	TRUE
IgD on IgD+ CD24+	rs72944511	T	G	T	G	1.279	0.000531894	0.0021	0.02513	FALSE	FALSE	FALSE	ieu-b-4874	2	216742657	0.000432265	373295	0.22	bladder cancer	TRUE	NA	NA	NA	NA	NA	NA	NA	8.17e-06	2	216742657	3656	0.2862	TRUE	2	1	TRUE
IgD on IgD+ CD24+	rs73022545	A	G	A	G	0.2429	-0.000125117	0.0557	0.04164	FALSE	FALSE	FALSE	ieu-b-4874	6	164591715	0.000338397	373295	0.709999	bladder cancer	TRUE	NA	NA	NA	NA	NA	NA	NA	4.95e-06	6	164591715	3656	0.0531	TRUE	2	1	TRUE
IgD on IgD+ CD24+	rs73031919	C	T	C	T	-0.1963	-8.56e-05	0.0904	0.201896	FALSE	FALSE	FALSE	ieu-b-4874	5	1980101	0.000168842	373295	0.61	bladder cancer	TRUE	NA	NA	NA	NA	NA	NA	NA	6.35e-06	5	1980101	3656	0.04342	TRUE	2	1	TRUE
IgD on IgD+ CD24+	rs74143009	A	G	A	G	0.7304	0.000273431	0.0056	0.031801	FALSE	FALSE	FALSE	ieu-b-4874	10	69860366	0.000388424	373295	0.48	bladder cancer	TRUE	NA	NA	NA	NA	NA	NA	NA	7.75e-06	10	69860366	3656	0.1631	TRUE	2	1	TRUE
IgD on IgD+ CD24+	rs80149865	G	C	G	C	0.7425	-0.000219905	0.0068	0.021755	FALSE	TRUE	FALSE	ieu-b-4874	8	120027617	0.000464781	373295	0.64	bladder cancer	TRUE	NA	NA	NA	NA	NA	NA	NA	1.29e-06	8	120027617	3656	0.1531	TRUE	2	1	TRUE
IgD on IgD+ CD24+	rs850492	A	G	A	G	-0.1289	-2.45e-05	0.7326	0.717453	FALSE	FALSE	FALSE	ieu-b-4874	7	145314534	0.000150359	373295	0.87	bladder cancer	TRUE	NA	NA	NA	NA	NA	NA	NA	5.17e-06	7	145314534	3656	0.02823	TRUE	2	1	TRUE
IgD on IgD+ CD24+	rs9265515	C	T	C	T	-0.221	0.000187034	0.3368	0.150629	FALSE	FALSE	FALSE	ieu-b-4874	6	31297744	0.000189212	373295	0.32	bladder cancer	TRUE	NA	NA	NA	NA	NA	NA	NA	1.2e-11	6	31297744	3656	0.03249	TRUE	2	1	TRUE
CD24 on IgD+ CD38-	rs1007713	A	G	A	G	0.1897	-0.000266377	0.1009	0.234326	FALSE	FALSE	FALSE	ieu-b-4874	5	79150995	0.000160577	373295	0.0969996	bladder cancer	TRUE	NA	NA	NA	NA	NA	NA	NA	4.85e-06	5	79150995	3638	0.04144	TRUE	2	1	TRUE
CD24 on IgD+ CD38-	rs11102943	A	G	A	G	-0.1499	3e-05	0.1682	0.166563	FALSE	FALSE	FALSE	ieu-b-4874	1	115907459	0.000182581	373295	0.87	bladder cancer	TRUE	NA	NA	NA	NA	NA	NA	NA	7.19e-06	1	115907459	3638	0.03334	TRUE	2	1	TRUE
CD24 on IgD+ CD38-	rs11781090	T	C	T	C	0.1316	0.000322313	0.6622	0.557286	FALSE	FALSE	FALSE	ieu-b-4874	8	144871633	0.000138565	373295	0.02	bladder cancer	TRUE	NA	NA	NA	NA	NA	NA	NA	6.71e-07	8	144871633	3638	0.02643	TRUE	2	1	TRUE
CD24 on IgD+ CD38-	rs138034828	C	G	C	G	0.2825	-7.19e-05	0.0482	0.03113	FALSE	TRUE	FALSE	ieu-b-4874	10	111599201	0.000406292	373295	0.86	bladder cancer	TRUE	NA	NA	NA	NA	NA	NA	NA	1.49e-06	10	111599201	3638	0.05859	TRUE	2	1	TRUE
CD24 on IgD+ CD38-	rs143053604	G	A	G	A	-0.8464	6.77e-06	0.0056	0.043408	FALSE	FALSE	FALSE	ieu-b-4874	11	12834785	0.000342676	373295	0.98	bladder cancer	TRUE	NA	NA	NA	NA	NA	NA	NA	2.7e-07	11	12834785	3638	0.1643	TRUE	2	1	TRUE
CD24 on IgD+ CD38-	rs144378737	G	A	G	A	-2.105	0.000197694	0.0007	0.026493	FALSE	FALSE	FALSE	ieu-b-4874	4	144991868	0.000452859	373295	0.66	bladder cancer	TRUE	NA	NA	NA	NA	NA	NA	NA	3.47e-06	4	144991868	3638	0.4528	TRUE	2	1	TRUE
CD24 on IgD+ CD38-	rs4435699	G	C	G	C	0.1151	-9.08e-06	0.6192	0.633233	FALSE	TRUE	FALSE	ieu-b-4874	4	164019500	0.00014039	373295	0.95	bladder cancer	TRUE	NA	NA	NA	NA	NA	NA	NA	7.95e-06	4	164019500	3638	0.02573	TRUE	2	1	TRUE
CD24 on IgD+ CD38-	rs59866449	G	A	G	A	-0.2747	0.000859643	0.0429	0.057073	FALSE	FALSE	FALSE	ieu-b-4874	12	94556734	0.000292668	373295	0.00329997	bladder cancer	TRUE	NA	NA	NA	NA	NA	NA	NA	6.39e-06	12	94556734	3638	0.06079	TRUE	2	1	TRUE
CD24 on IgD+ CD38-	rs62358439	A	G	A	G	-1.053	-0.000571813	0.0026	0.028532	FALSE	FALSE	FALSE	ieu-b-4874	5	57060537	0.000407758	373295	0.16	bladder cancer	TRUE	NA	NA	NA	NA	NA	NA	NA	8.69e-06	5	57060537	3638	0.2364	TRUE	2	1	TRUE
CD24 on IgD+ CD38-	rs72782129	G	T	G	T	1.139	0.000458822	0.0019	0.029457	FALSE	FALSE	FALSE	ieu-b-4874	5	111200853	0.000413591	373295	0.27	bladder cancer	TRUE	NA	NA	NA	NA	NA	NA	NA	6.88e-06	5	111200853	3638	0.2529	TRUE	2	1	TRUE
CD24 on IgD+ CD38-	rs75307680	G	T	G	T	0.4013	-0.000294194	0.0201	0.087612	FALSE	FALSE	FALSE	ieu-b-4874	2	144289202	0.000239243	373295	0.22	bladder cancer	TRUE	NA	NA	NA	NA	NA	NA	NA	9.33e-06	2	144289202	3638	0.09042	TRUE	2	1	TRUE
CD24 on IgD+ CD38-	rs77154655	C	T	C	T	-0.2498	0.000209991	0.0524	0.052706	FALSE	FALSE	FALSE	ieu-b-4874	3	16255245	0.000303337	373295	0.49	bladder cancer	TRUE	NA	NA	NA	NA	NA	NA	NA	6.94e-06	3	16255245	3638	0.05549	TRUE	2	1	TRUE
CD24 on IgD+ CD38-	rs77636548	C	T	C	T	-0.3484	-0.000155079	0.0346	0.028382	FALSE	FALSE	FALSE	ieu-b-4874	14	43192207	0.000435892	373295	0.719999	bladder cancer	TRUE	NA	NA	NA	NA	NA	NA	NA	2.45e-07	14	43192207	3638	0.06738	TRUE	2	1	TRUE
CD24 on IgD+ CD38-	rs783418	C	G	C	G	-0.1534	-0.000430993	0.834	0.925747	FALSE	TRUE	FALSE	ieu-b-4874	6	106962679	0.000258091	373295	0.0949992	bladder cancer	TRUE	NA	NA	NA	NA	NA	NA	NA	4.36e-06	6	106962679	3638	0.03335	TRUE	2	1	TRUE
CD24 on IgD+ CD38-	rs792792	T	C	T	C	-0.1949	6.82e-06	0.885	0.082215	FALSE	FALSE	FALSE	ieu-b-4874	17	51172115	0.000246091	373295	0.98	bladder cancer	TRUE	TRUE	rs792792	rs792797	C	T	A	T	1.07e-06	17	51153533	3638	0.03989	TRUE	2	1	TRUE
CD24 on IgD+ CD38-	rs8089264	T	C	T	C	0.2949	0.000267767	0.0469	0.075039	FALSE	FALSE	FALSE	ieu-b-4874	18	46221152	0.000257311	373295	0.3	bladder cancer	TRUE	NA	NA	NA	NA	NA	NA	NA	7.69e-07	18	46221152	3638	0.05956	TRUE	2	1	TRUE
CD24 on IgD+ CD38-	rs9270560	C	T	C	T	-0.1353	-6.51e-06	0.5884	0.629933	FALSE	FALSE	FALSE	ieu-b-4874	6	32577814	0.000146898	373295	0.96	bladder cancer	TRUE	TRUE	rs9270560	rs673002	T	C	G	T	7.22e-06	6	32560741	3638	0.03012	TRUE	2	1	TRUE
CD24 on IgD+ CD38-	rs9400058	G	A	G	A	-0.432	-0.000245127	0.0651	0.071035	FALSE	FALSE	FALSE	ieu-b-4874	6	107164076	0.000263716	373295	0.35	bladder cancer	TRUE	NA	NA	NA	NA	NA	NA	NA	2.66e-17	6	107164076	3638	0.05081	TRUE	2	1	TRUE
CD24 on IgD+ CD38-	rs9479391	A	T	A	T	-0.2277	-0.000185371	0.0722	0.126362	FALSE	TRUE	FALSE	ieu-b-4874	6	153107656	0.000207919	373295	0.37	bladder cancer	TRUE	NA	NA	NA	NA	NA	NA	NA	3.14e-06	6	153107656	3638	0.04877	TRUE	2	1	TRUE
HSC AC	rs10080768	T	C	T	C	0.1703	0.000131805	0.7374	0.701684	FALSE	FALSE	FALSE	ieu-b-4874	6	2760245	0.000148351	373295	0.37	bladder cancer	TRUE	NA	NA	NA	NA	NA	NA	NA	2.34e-06	6	2760245	1858	0.03596	TRUE	2	1	TRUE
HSC AC	rs10809987	C	T	C	T	0.2534	-0.000488325	0.1082	0.141335	FALSE	FALSE	FALSE	ieu-b-4874	9	13585363	0.000197428	373295	0.0129999	bladder cancer	TRUE	NA	NA	NA	NA	NA	NA	NA	6.39e-07	9	13585363	1858	0.05071	TRUE	2	1	TRUE
HSC AC	rs112258784	G	A	G	A	-0.7371	0.000429717	0.0102	0.009774	FALSE	FALSE	FALSE	ieu-b-4874	2	191027207	0.000693764	373295	0.54	bladder cancer	TRUE	TRUE	rs112258784	rs112815166	G	A	T	C	4.75e-06	2	191015741	1858	0.1606	TRUE	2	1	TRUE
HSC AC	rs115076910	C	T	C	T	0.1647	-0.000152487	0.2484	0.216474	FALSE	FALSE	FALSE	ieu-b-4874	11	121009627	0.00016467	373295	0.35	bladder cancer	TRUE	TRUE	rs115076910	rs541623	C	T	A	G	9.1e-06	11	121009383	1858	0.03701	TRUE	2	1	TRUE
HSC AC	rs115937242	A	G	A	G	1.543	-0.000205017	0.0086	0.011449	FALSE	FALSE	FALSE	ieu-b-4874	2	136121922	0.000701323	373295	0.77	bladder cancer	TRUE	NA	NA	NA	NA	NA	NA	NA	2.3e-18	2	136121922	1858	0.1747	TRUE	2	1	TRUE
HSC AC	rs142114110	G	A	G	A	-0.4209	-0.000568528	0.0334	0.0183	FALSE	FALSE	FALSE	ieu-b-4874	7	82240518	0.000541265	373295	0.29	bladder cancer	TRUE	NA	NA	NA	NA	NA	NA	NA	2.87e-06	7	82240518	1858	0.08967	TRUE	2	1	TRUE
HSC AC	rs1432243	C	T	C	T	-0.5029	7.01e-05	0.9771	0.839191	FALSE	FALSE	FALSE	ieu-b-4874	2	137773206	0.000183844	373295	0.7	bladder cancer	TRUE	NA	NA	NA	NA	NA	NA	NA	1.2e-06	2	137773206	1858	0.1032	TRUE	2	1	TRUE
HSC AC	rs143685973	T	C	T	C	-0.276	-0.000253194	0.0751	0.022991	FALSE	FALSE	FALSE	ieu-b-4874	9	136023292	0.000478785	373295	0.6	bladder cancer	TRUE	NA	NA	NA	NA	NA	NA	NA	7.11e-06	9	136023292	1858	0.06129	TRUE	2	1	TRUE
HSC AC	rs2724803	G	C	G	C	-0.3134	-0.000486371	0.9451	0.915298	FALSE	TRUE	FALSE	ieu-b-4874	10	12404560	0.000249676	373295	0.051	bladder cancer	TRUE	NA	NA	NA	NA	NA	NA	NA	7.43e-06	10	12404560	1858	0.06974	TRUE	2	1	TRUE
HSC AC	rs2887466	T	C	T	C	0.152	-0.000122446	0.5823	0.533322	FALSE	FALSE	FALSE	ieu-b-4874	3	131748507	0.00013602	373295	0.37	bladder cancer	TRUE	NA	NA	NA	NA	NA	NA	NA	3.25e-06	3	131748507	1858	0.03257	TRUE	2	1	TRUE
HSC AC	rs34526926	A	G	A	G	-0.2775	-0.000167038	0.0721	0.121483	FALSE	FALSE	FALSE	ieu-b-4874	8	78599881	0.000206659	373295	0.42	bladder cancer	TRUE	NA	NA	NA	NA	NA	NA	NA	7.83e-06	8	78599881	1858	0.0619	TRUE	2	1	TRUE
HSC AC	rs466736	G	A	G	A	0.2384	4.06e-06	0.0974	0.115647	FALSE	FALSE	FALSE	ieu-b-4874	21	20337514	0.000213509	373295	0.98	bladder cancer	TRUE	NA	NA	NA	NA	NA	NA	NA	5.95e-06	21	20337514	1858	0.0525	TRUE	2	1	TRUE
HSC AC	rs6416872	C	T	C	T	0.1462	-0.000269713	0.4378	0.511373	FALSE	FALSE	FALSE	ieu-b-4874	17	2750333	0.000137839	373295	0.05	bladder cancer	TRUE	NA	NA	NA	NA	NA	NA	NA	5.25e-06	17	2750333	1858	0.03201	TRUE	2	1	TRUE
HSC AC	rs74529033	G	A	G	A	1.453	0.000143767	0.0081	0.018768	FALSE	FALSE	FALSE	ieu-b-4874	2	137747326	0.000498468	373295	0.77	bladder cancer	TRUE	NA	NA	NA	NA	NA	NA	NA	2e-15	2	137747326	1858	0.1814	TRUE	2	1	TRUE
HSC AC	rs77058454	T	C	T	C	-1.326	-9.02e-05	0.0038	0.027023	FALSE	FALSE	FALSE	ieu-b-4874	15	81301816	0.00042739	373295	0.83	bladder cancer	TRUE	NA	NA	NA	NA	NA	NA	NA	1.78e-06	15	81301816	1858	0.2766	TRUE	2	1	TRUE
HSC AC	rs77538571	G	C	G	C	0.9085	1.66e-05	0.0062	0.035681	FALSE	TRUE	FALSE	ieu-b-4874	8	4006968	0.00036571	373295	0.96	bladder cancer	TRUE	NA	NA	NA	NA	NA	NA	NA	4.59e-06	8	4006968	1858	0.1977	TRUE	2	1	TRUE
HSC AC	rs80237985	A	G	A	G	0.4172	-0.000229283	0.0307	0.030222	FALSE	FALSE	FALSE	ieu-b-4874	1	217396264	0.000395771	373295	0.56	bladder cancer	TRUE	NA	NA	NA	NA	NA	NA	NA	7.05e-06	1	217396264	1858	0.0926	TRUE	2	1	TRUE
CCR2 on CD14+ CD16- monocyte	rs10081735	A	G	A	G	0.2007	-0.000126999	0.0926	0.148591	FALSE	FALSE	FALSE	ieu-b-4874	9	105486830	0.00019034	373295	0.5	bladder cancer	TRUE	NA	NA	NA	NA	NA	NA	NA	1.76e-06	9	105486830	3629	0.04193	TRUE	2	1	TRUE
CCR2 on CD14+ CD16- monocyte	rs10878258	G	A	G	A	-0.1348	1.34e-05	0.4332	0.277882	FALSE	FALSE	FALSE	ieu-b-4874	12	40641692	0.000151764	373295	0.93	bladder cancer	TRUE	NA	NA	NA	NA	NA	NA	NA	1.32e-07	12	40641692	3629	0.02549	TRUE	2	1	TRUE
CCR2 on CD14+ CD16- monocyte	rs111162334	T	C	T	C	0.1125	-0.000183782	0.4928	0.391989	FALSE	FALSE	FALSE	ieu-b-4874	7	51430245	0.000139139	373295	0.19	bladder cancer	TRUE	NA	NA	NA	NA	NA	NA	NA	4.03e-06	7	51430245	3629	0.02437	TRUE	2	1	TRUE
CCR2 on CD14+ CD16- monocyte	rs114744368	T	C	T	C	-0.6352	2.56e-06	0.007	0.046313	FALSE	FALSE	FALSE	ieu-b-4874	1	240779226	0.000321308	373295	0.99	bladder cancer	TRUE	NA	NA	NA	NA	NA	NA	NA	6.6e-06	1	240779226	3629	0.1408	TRUE	2	1	TRUE
CCR2 on CD14+ CD16- monocyte	rs116078872	T	G	T	G	-0.8485	0.00019411	0.0039	0.060235	FALSE	FALSE	FALSE	ieu-b-4874	2	239553302	0.000284221	373295	0.49	bladder cancer	TRUE	NA	NA	NA	NA	NA	NA	NA	9.52e-06	2	239553302	3629	0.1914	TRUE	2	1	TRUE
CCR2 on CD14+ CD16- monocyte	rs12613485	A	G	A	G	-0.1948	6.44e-05	0.0845	0.097019	FALSE	FALSE	FALSE	ieu-b-4874	2	102154764	0.000233456	373295	0.780001	bladder cancer	TRUE	NA	NA	NA	NA	NA	NA	NA	9.32e-06	2	102154764	3629	0.04389	TRUE	2	1	TRUE
CCR2 on CD14+ CD16- monocyte	rs13060505	G	C	G	C	0.4217	-0.000147659	0.0234	0.022208	FALSE	TRUE	FALSE	ieu-b-4874	3	46968023	0.00046299	373295	0.75	bladder cancer	TRUE	NA	NA	NA	NA	NA	NA	NA	2.39e-07	3	46968023	3629	0.08148	TRUE	2	1	TRUE
CCR2 on CD14+ CD16- monocyte	rs147404212	A	G	A	G	1.964	0.000765842	0.0007	0.017026	FALSE	FALSE	FALSE	ieu-b-4874	9	100014987	0.000578395	373295	0.19	bladder cancer	TRUE	NA	NA	NA	NA	NA	NA	NA	6.3e-06	9	100014987	3629	0.4343	TRUE	2	1	TRUE
CCR2 on CD14+ CD16- monocyte	rs2160337	G	T	G	T	0.1301	0.000156082	0.2255	0.267737	FALSE	FALSE	FALSE	ieu-b-4874	2	36964751	0.000152857	373295	0.31	bladder cancer	TRUE	NA	NA	NA	NA	NA	NA	NA	7.62e-06	2	36964751	3629	0.02904	TRUE	2	1	TRUE
CCR2 on CD14+ CD16- monocyte	rs2270454	T	C	T	C	-0.2457	0.000323945	0.0525	0.107424	FALSE	FALSE	FALSE	ieu-b-4874	3	10292140	0.000218271	373295	0.14	bladder cancer	TRUE	NA	NA	NA	NA	NA	NA	NA	5.19e-06	3	10292140	3629	0.05383	TRUE	2	1	TRUE
CCR2 on CD14+ CD16- monocyte	rs2426939	C	A	C	A	-0.1098	9.96e-05	0.4842	0.371636	FALSE	FALSE	FALSE	ieu-b-4874	20	59484022	0.000140454	373295	0.48	bladder cancer	TRUE	NA	NA	NA	NA	NA	NA	NA	6.97e-06	20	59484022	3629	0.02439	TRUE	2	1	TRUE
CCR2 on CD14+ CD16- monocyte	rs2683681	A	G	A	G	0.1117	-4.98e-05	0.5003	0.523744	FALSE	FALSE	FALSE	ieu-b-4874	2	67747535	0.00013528	373295	0.709999	bladder cancer	TRUE	NA	NA	NA	NA	NA	NA	NA	7.35e-06	2	67747535	3629	0.02488	TRUE	2	1	TRUE
CCR2 on CD14+ CD16- monocyte	rs4683184	A	G	A	G	0.2454	-5.94e-05	0.6904	0.639372	FALSE	FALSE	FALSE	ieu-b-4874	3	46187707	0.000140731	373295	0.67	bladder cancer	TRUE	NA	NA	NA	NA	NA	NA	NA	1.17e-20	3	46187707	3629	0.02618	TRUE	2	1	TRUE
CCR2 on CD14+ CD16- monocyte	rs56407854	A	G	A	G	0.1508	0.000398833	0.1612	0.169847	FALSE	FALSE	FALSE	ieu-b-4874	8	136669344	0.000181335	373295	0.0280001	bladder cancer	TRUE	NA	NA	NA	NA	NA	NA	NA	4.15e-06	8	136669344	3629	0.03271	TRUE	2	1	TRUE
CCR2 on CD14+ CD16- monocyte	rs62327180	A	G	A	G	-0.1199	-2.33e-05	0.2856	0.325247	FALSE	FALSE	FALSE	ieu-b-4874	4	103540762	0.000144785	373295	0.87	bladder cancer	TRUE	NA	NA	NA	NA	NA	NA	NA	8.11e-06	4	103540762	3629	0.02683	TRUE	2	1	TRUE
CCR2 on CD14+ CD16- monocyte	rs7000391	C	T	C	T	0.16	8.15e-05	0.1382	0.15017	FALSE	FALSE	FALSE	ieu-b-4874	8	12709650	0.000196138	373295	0.68	bladder cancer	TRUE	NA	NA	NA	NA	NA	NA	NA	4.43e-06	8	12709650	3629	0.0348	TRUE	2	1	TRUE
CCR2 on CD14+ CD16- monocyte	rs777404	A	G	A	G	2.407	-0.000782609	0.0006	0.015587	FALSE	FALSE	FALSE	ieu-b-4874	4	71016615	0.000550875	373295	0.16	bladder cancer	TRUE	NA	NA	NA	NA	NA	NA	NA	1.2e-06	4	71016615	3629	0.495	TRUE	2	1	TRUE
CCR2 on CD14+ CD16- monocyte	rs78109162	A	G	A	G	-0.2786	-0.000279484	0.042	0.065445	FALSE	FALSE	FALSE	ieu-b-4874	11	129986854	0.000278068	373295	0.31	bladder cancer	TRUE	NA	NA	NA	NA	NA	NA	NA	4.69e-06	11	129986854	3629	0.06076	TRUE	2	1	TRUE
CCR2 on CD14+ CD16- monocyte	rs7896883	C	T	C	T	0.1675	7.3e-05	0.1199	0.206368	FALSE	FALSE	FALSE	ieu-b-4874	10	98787354	0.000168913	373295	0.67	bladder cancer	TRUE	NA	NA	NA	NA	NA	NA	NA	7.78e-06	10	98787354	3629	0.0374	TRUE	2	1	TRUE
CCR2 on CD14+ CD16- monocyte	rs79049673	T	C	T	C	0.351	-5.08e-05	0.0281	0.020037	FALSE	FALSE	FALSE	ieu-b-4874	19	3274527	0.0005152	373295	0.92	bladder cancer	TRUE	NA	NA	NA	NA	NA	NA	NA	3.25e-06	19	3274527	3629	0.07529	TRUE	2	1	TRUE
CCR2 on CD14+ CD16- monocyte	rs79825014	T	G	T	G	-0.4165	0.000192303	0.0336	0.042619	FALSE	FALSE	FALSE	ieu-b-4874	3	46880193	0.000334782	373295	0.57	bladder cancer	TRUE	NA	NA	NA	NA	NA	NA	NA	1.02e-09	3	46880193	3629	0.06803	TRUE	2	1	TRUE
Mo MDSC AC	rs10082958	T	A	T	A	0.2114	0.000232564	0.858	0.756756	FALSE	TRUE	FALSE	ieu-b-4874	12	89653407	0.000158704	373295	0.14	bladder cancer	TRUE	NA	NA	NA	NA	NA	NA	NA	9.41e-06	12	89653407	1855	0.04759	TRUE	2	1	TRUE
Mo MDSC AC	rs10176753	G	A	G	A	-0.1561	0.000141345	0.4941	0.474691	FALSE	FALSE	FALSE	ieu-b-4874	2	133046981	0.000173104	373295	0.41	bladder cancer	TRUE	NA	NA	NA	NA	NA	NA	NA	3.91e-06	2	133046981	1855	0.03371	TRUE	2	1	TRUE
Mo MDSC AC	rs10458377	G	A	G	A	-0.2164	0.000133573	0.8423	0.893071	FALSE	FALSE	FALSE	ieu-b-4874	1	226154277	0.00023028	373295	0.56	bladder cancer	TRUE	NA	NA	NA	NA	NA	NA	NA	3.99e-06	1	226154277	1855	0.04679	TRUE	2	1	TRUE
Mo MDSC AC	rs11112649	C	G	C	G	-0.1727	-2.56e-05	0.2984	0.249295	FALSE	TRUE	FALSE	ieu-b-4874	12	106064969	0.000156848	373295	0.87	bladder cancer	TRUE	NA	NA	NA	NA	NA	NA	NA	2.2e-06	12	106064969	1855	0.03637	TRUE	2	1	TRUE
Mo MDSC AC	rs112611150	T	C	T	C	-0.3141	-2.47e-05	0.0652	0.032314	FALSE	FALSE	FALSE	ieu-b-4874	7	186897	0.000385053	373295	0.95	bladder cancer	TRUE	NA	NA	NA	NA	NA	NA	NA	3.55e-06	7	186897	1855	0.06753	TRUE	2	1	TRUE
Mo MDSC AC	rs12082268	C	T	C	T	0.485	0.000840199	0.0245	0.025297	FALSE	FALSE	FALSE	ieu-b-4874	1	217288095	0.000437583	373295	0.0549997	bladder cancer	TRUE	NA	NA	NA	NA	NA	NA	NA	7.85e-06	1	217288095	1855	0.1082	TRUE	2	1	TRUE
Mo MDSC AC	rs12736179	T	C	T	C	-0.1687	0.000225736	0.3032	0.145899	FALSE	FALSE	FALSE	ieu-b-4874	1	20887141	0.000198669	373295	0.26	bladder cancer	TRUE	NA	NA	NA	NA	NA	NA	NA	2.96e-06	1	20887141	1855	0.03599	TRUE	2	1	TRUE
Mo MDSC AC	rs12885009	A	C	A	C	-0.1714	-0.000219253	0.6873	0.686817	FALSE	FALSE	FALSE	ieu-b-4874	14	85063049	0.000146179	373295	0.13	bladder cancer	TRUE	NA	NA	NA	NA	NA	NA	NA	2.93e-06	14	85063049	1855	0.03654	TRUE	2	1	TRUE
Mo MDSC AC	rs1354106	G	T	G	T	-0.4306	-0.000300251	0.2237	0.355606	FALSE	FALSE	FALSE	ieu-b-4874	19	51737991	0.000142186	373295	0.0350002	bladder cancer	TRUE	NA	NA	NA	NA	NA	NA	NA	1.72e-28	19	51737991	1855	0.03825	TRUE	2	1	TRUE
Mo MDSC AC	rs1800973	A	C	A	C	0.3114	-0.000230826	0.0806	0.061338	FALSE	FALSE	FALSE	ieu-b-4874	12	69744014	0.000281814	373295	0.41	bladder cancer	TRUE	NA	NA	NA	NA	NA	NA	NA	3.45e-07	12	69744014	1855	0.06087	TRUE	2	1	TRUE
Mo MDSC AC	rs2071473	T	C	T	C	-0.2405	0.000175928	0.3892	0.30089	FALSE	FALSE	FALSE	ieu-b-4874	6	32788707	0.000147104	373295	0.23	bladder cancer	TRUE	TRUE	rs2071473	rs2621323	T	C	G	A	2.3e-10	6	32782605	1855	0.03772	TRUE	2	1	TRUE
Mo MDSC AC	rs3007125	T	C	T	C	0.2011	-0.000215187	0.1644	0.175231	FALSE	FALSE	FALSE	ieu-b-4874	14	47267652	0.000177967	373295	0.23	bladder cancer	TRUE	NA	NA	NA	NA	NA	NA	NA	5.4e-06	14	47267652	1855	0.04408	TRUE	2	1	TRUE
Mo MDSC AC	rs7757733	A	G	A	G	-0.1533	8.23e-05	0.5245	0.637175	FALSE	FALSE	FALSE	ieu-b-4874	6	5580339	0.000140672	373295	0.56	bladder cancer	TRUE	NA	NA	NA	NA	NA	NA	NA	3.33e-06	6	5580339	1855	0.03286	TRUE	2	1	TRUE
Mo MDSC AC	rs78949787	T	C	T	C	0.1531	-6.3e-05	0.5539	0.536681	FALSE	FALSE	FALSE	ieu-b-4874	19	51591138	0.00013852	373295	0.649999	bladder cancer	TRUE	NA	NA	NA	NA	NA	NA	NA	4.72e-06	19	51591138	1855	0.03336	TRUE	2	1	TRUE
Mo MDSC AC	rs80032720	A	G	A	G	-0.4389	0.000609196	0.0749	0.013938	FALSE	FALSE	FALSE	ieu-b-4874	6	32384933	0.000573106	373295	0.29	bladder cancer	TRUE	NA	NA	NA	NA	NA	NA	NA	4.31e-10	6	32384933	1855	0.06992	TRUE	2	1	TRUE
Mo MDSC AC	rs9270591	T	C	T	C	0.4161	8.68e-05	0.5755	0.488489	FALSE	FALSE	FALSE	ieu-b-4874	6	32565465	0.000140267	373295	0.54	bladder cancer	TRUE	TRUE	rs9270591	rs2760981	C	T	G	A	5.46e-26	6	32561424	1855	0.03887	TRUE	2	1	TRUE
Mo MDSC AC	rs9792404	A	G	A	G	0.1972	-2.8e-05	0.1717	0.126871	FALSE	FALSE	FALSE	ieu-b-4874	9	8429048	0.000204232	373295	0.89	bladder cancer	TRUE	NA	NA	NA	NA	NA	NA	NA	7.76e-06	9	8429048	1855	0.04398	TRUE	2	1	TRUE
CD3 on CD8br	rs10083033	C	T	C	T	-0.1276	6.67e-05	0.3806	0.449955	FALSE	FALSE	FALSE	ieu-b-4874	12	105899685	0.000135905	373295	0.62	bladder cancer	TRUE	NA	NA	NA	NA	NA	NA	NA	7.06e-06	12	105899685	2918	0.02835	TRUE	2	1	TRUE
CD3 on CD8br	rs10494441	T	C	T	C	-0.372	-0.000379691	0.037	0.048311	FALSE	FALSE	FALSE	ieu-b-4874	1	165250607	0.000316949	373295	0.23	bladder cancer	TRUE	NA	NA	NA	NA	NA	NA	NA	1.85e-07	1	165250607	2918	0.07117	TRUE	2	1	TRUE
CD3 on CD8br	rs10828773	A	G	A	G	0.1788	0.000197463	0.1381	0.140718	FALSE	FALSE	FALSE	ieu-b-4874	10	18783325	0.000194441	373295	0.31	bladder cancer	TRUE	NA	NA	NA	NA	NA	NA	NA	6.64e-06	10	18783325	2918	0.03962	TRUE	2	1	TRUE
CD3 on CD8br	rs116757920	A	G	A	G	0.4338	-0.000706309	0.0224	0.014362	FALSE	FALSE	FALSE	ieu-b-4874	1	117441813	0.000590876	373295	0.23	bladder cancer	TRUE	NA	NA	NA	NA	NA	NA	NA	1.83e-06	1	117441813	2918	0.09072	TRUE	2	1	TRUE
CD3 on CD8br	rs12132394	A	G	A	G	0.1355	0.00024602	0.6839	0.532626	FALSE	FALSE	FALSE	ieu-b-4874	1	235247955	0.000136914	373295	0.0719996	bladder cancer	TRUE	NA	NA	NA	NA	NA	NA	NA	2.8e-06	1	235247955	2918	0.02887	TRUE	2	1	TRUE
CD3 on CD8br	rs12144916	G	A	G	A	0.1391	-7.65e-05	0.3494	0.386958	FALSE	FALSE	FALSE	ieu-b-4874	1	167154534	0.000138732	373295	0.58	bladder cancer	TRUE	NA	NA	NA	NA	NA	NA	NA	1.05e-06	1	167154534	2918	0.02844	TRUE	2	1	TRUE
CD3 on CD8br	rs12476279	A	G	A	G	0.2098	1.98e-05	0.0879	0.043813	FALSE	FALSE	FALSE	ieu-b-4874	2	229680074	0.000331055	373295	0.95	bladder cancer	TRUE	NA	NA	NA	NA	NA	NA	NA	9.83e-06	2	229680074	2918	0.04738	TRUE	2	1	TRUE
CD3 on CD8br	rs140965084	T	C	T	C	0.502	-5.61e-05	0.0146	0.018031	FALSE	FALSE	FALSE	ieu-b-4874	1	236324551	0.000533359	373295	0.92	bladder cancer	TRUE	NA	NA	NA	NA	NA	NA	NA	8.06e-06	1	236324551	2918	0.1123	TRUE	2	1	TRUE
CD3 on CD8br	rs142477005	T	C	T	C	-0.5191	-0.000281522	0.0135	0.018098	FALSE	FALSE	FALSE	ieu-b-4874	16	4504398	0.000521317	373295	0.59	bladder cancer	TRUE	NA	NA	NA	NA	NA	NA	NA	9.77e-06	16	4504398	2918	0.1172	TRUE	2	1	TRUE
CD3 on CD8br	rs143008344	T	C	T	C	-0.3355	0.000329174	0.0334	0.028334	FALSE	FALSE	FALSE	ieu-b-4874	3	64946405	0.000418292	373295	0.43	bladder cancer	TRUE	NA	NA	NA	NA	NA	NA	NA	7.57e-06	3	64946405	2918	0.07481	TRUE	2	1	TRUE
CD3 on CD8br	rs1723018	G	A	G	A	0.4112	1.43e-06	0.4568	0.40838	FALSE	FALSE	FALSE	ieu-b-4874	1	167433420	0.000137423	373295	0.99	bladder cancer	TRUE	NA	NA	NA	NA	NA	NA	NA	6.13e-53	1	167433420	2918	0.02631	TRUE	2	1	TRUE
CD3 on CD8br	rs188662274	G	A	G	A	-0.354	-0.000332692	0.0355	0.010951	FALSE	FALSE	FALSE	ieu-b-4874	22	38091241	0.000690324	373295	0.630001	bladder cancer	TRUE	NA	NA	NA	NA	NA	NA	NA	2.33e-06	22	38091241	2918	0.07482	TRUE	2	1	TRUE
CD3 on CD8br	rs2949670	T	A	T	A	0.1933	9.59e-06	0.8639	0.895363	FALSE	TRUE	FALSE	ieu-b-4874	1	167406513	0.000221276	373295	0.97	bladder cancer	TRUE	NA	NA	NA	NA	NA	NA	NA	1.34e-06	1	167406513	2918	0.03989	TRUE	2	1	TRUE
CD3 on CD8br	rs61916018	T	C	T	C	0.1677	-5.55e-05	0.1551	0.146477	FALSE	FALSE	FALSE	ieu-b-4874	11	101769251	0.000193535	373295	0.77	bladder cancer	TRUE	NA	NA	NA	NA	NA	NA	NA	9e-06	11	101769251	2918	0.0377	TRUE	2	1	TRUE
CD3 on CD8br	rs6479155	C	T	C	T	-0.1407	-7.55e-05	0.4974	0.476755	FALSE	FALSE	FALSE	ieu-b-4874	9	105868652	0.000135516	373295	0.58	bladder cancer	TRUE	NA	NA	NA	NA	NA	NA	NA	1.54e-07	9	105868652	2918	0.02675	TRUE	2	1	TRUE
CD3 on CD8br	rs71381322	A	G	A	G	1.538	-0.000229758	0.0022	0.031573	FALSE	FALSE	FALSE	ieu-b-4874	17	48900824	0.000400969	373295	0.57	bladder cancer	TRUE	NA	NA	NA	NA	NA	NA	NA	8.94e-07	17	48900824	2918	0.3123	TRUE	2	1	TRUE
CD3 on CD8br	rs7174332	A	G	A	G	0.1302	0.000330181	0.3276	0.306097	FALSE	FALSE	FALSE	ieu-b-4874	15	33309800	0.000147549	373295	0.025	bladder cancer	TRUE	NA	NA	NA	NA	NA	NA	NA	9.66e-06	15	33309800	2918	0.02936	TRUE	2	1	TRUE
CD3 on CD8br	rs7195854	G	C	G	C	0.1777	9.06e-05	0.1386	0.195451	FALSE	TRUE	FALSE	ieu-b-4874	16	83608598	0.000171969	373295	0.6	bladder cancer	TRUE	NA	NA	NA	NA	NA	NA	NA	4.02e-06	16	83608598	2918	0.03848	TRUE	2	1	TRUE
CD3 on CD8br	rs7203336	T	C	T	C	-0.1322	-4.96e-05	0.3413	0.445411	FALSE	FALSE	FALSE	ieu-b-4874	16	75217897	0.000144131	373295	0.73	bladder cancer	TRUE	NA	NA	NA	NA	NA	NA	NA	6.25e-06	16	75217897	2918	0.0292	TRUE	2	1	TRUE
CD3 on CD8br	rs75572339	A	G	A	G	0.2834	0.000228049	0.0589	0.064677	FALSE	FALSE	FALSE	ieu-b-4874	10	34500210	0.000276997	373295	0.41	bladder cancer	TRUE	NA	NA	NA	NA	NA	NA	NA	9.37e-07	10	34500210	2918	0.05767	TRUE	2	1	TRUE
CD3 on CD8br	rs76757975	A	C	A	C	1.193	-0.000348574	0.0026	0.022269	FALSE	FALSE	FALSE	ieu-b-4874	3	78658127	0.000458279	373295	0.450001	bladder cancer	TRUE	NA	NA	NA	NA	NA	NA	NA	3.65e-06	3	78658127	2918	0.2571	TRUE	2	1	TRUE
CD8br NKT AC	rs1008425	G	A	G	A	0.1228	-0.000163244	0.7178	0.724721	FALSE	FALSE	FALSE	ieu-b-4874	19	32852145	0.000151348	373295	0.28	bladder cancer	TRUE	NA	NA	NA	NA	NA	NA	NA	8.2e-06	19	32852145	3652	0.0275	TRUE	2	1	TRUE
CD8br NKT AC	rs1077381	T	C	T	C	0.1155	4.74e-05	0.3627	0.480195	FALSE	FALSE	FALSE	ieu-b-4874	20	59623849	0.00013521	373295	0.73	bladder cancer	TRUE	NA	NA	NA	NA	NA	NA	NA	6.03e-06	20	59623849	3652	0.02547	TRUE	2	1	TRUE
CD8br NKT AC	rs115889733	A	G	A	G	0.2065	-3.5e-05	0.0776	0.057198	FALSE	FALSE	FALSE	ieu-b-4874	6	44207850	0.000300621	373295	0.91	bladder cancer	TRUE	NA	NA	NA	NA	NA	NA	NA	9.21e-06	6	44207850	3652	0.04649	TRUE	2	1	TRUE
CD8br NKT AC	rs11658693	G	A	G	A	-0.2038	-0.000361759	0.1123	0.082045	FALSE	FALSE	FALSE	ieu-b-4874	17	33800249	0.000246654	373295	0.14	bladder cancer	TRUE	NA	NA	NA	NA	NA	NA	NA	2.84e-07	17	33800249	3652	0.03962	TRUE	2	1	TRUE
CD8br NKT AC	rs117122100	T	C	T	C	-0.4686	-0.000497004	0.0141	0.014625	FALSE	FALSE	FALSE	ieu-b-4874	13	109403845	0.000563567	373295	0.38	bladder cancer	TRUE	NA	NA	NA	NA	NA	NA	NA	6.63e-06	13	109403845	3652	0.1039	TRUE	2	1	TRUE
CD8br NKT AC	rs12224032	G	C	G	C	0.1477	-0.000112905	0.2088	0.185757	FALSE	TRUE	FALSE	ieu-b-4874	11	112914680	0.000174277	373295	0.52	bladder cancer	TRUE	NA	NA	NA	NA	NA	NA	NA	1.69e-06	11	112914680	3652	0.03079	TRUE	2	1	TRUE
CD8br NKT AC	rs12422853	A	G	A	G	0.1113	0.000179197	0.4261	0.429883	FALSE	FALSE	FALSE	ieu-b-4874	12	105063882	0.000136622	373295	0.19	bladder cancer	TRUE	NA	NA	NA	NA	NA	NA	NA	8.03e-06	12	105063882	3652	0.02489	TRUE	2	1	TRUE
CD8br NKT AC	rs12792298	T	C	T	C	-0.3155	-0.000526001	0.0345	0.014716	FALSE	FALSE	FALSE	ieu-b-4874	11	112189184	0.00056174	373295	0.35	bladder cancer	TRUE	NA	NA	NA	NA	NA	NA	NA	2.3e-06	11	112189184	3652	0.06667	TRUE	2	1	TRUE
CD8br NKT AC	rs12940345	T	C	T	C	0.1138	0.000104843	0.5487	0.540855	FALSE	FALSE	FALSE	ieu-b-4874	17	74612462	0.000135785	373295	0.44	bladder cancer	TRUE	NA	NA	NA	NA	NA	NA	NA	4.33e-06	17	74612462	3652	0.02473	TRUE	2	1	TRUE
CD8br NKT AC	rs1325907	A	G	A	G	-0.1298	-7.19e-05	0.5795	0.524461	FALSE	FALSE	FALSE	ieu-b-4874	10	90237398	0.000135405	373295	0.6	bladder cancer	TRUE	NA	NA	NA	NA	NA	NA	NA	4.73e-07	10	90237398	3652	0.02573	TRUE	2	1	TRUE
CD8br NKT AC	rs144156455	C	T	C	T	0.3176	0.000323819	0.0356	0.027755	FALSE	FALSE	FALSE	ieu-b-4874	11	70988762	0.000466102	373295	0.49	bladder cancer	TRUE	NA	NA	NA	NA	NA	NA	NA	2.49e-06	11	70988762	3652	0.06734	TRUE	2	1	TRUE
CD8br NKT AC	rs17448682	T	C	T	C	0.142	-0.000345287	0.1967	0.232032	FALSE	FALSE	FALSE	ieu-b-4874	1	15966713	0.000160358	373295	0.0309999	bladder cancer	TRUE	NA	NA	NA	NA	NA	NA	NA	5.9e-06	1	15966713	3652	0.0313	TRUE	2	1	TRUE
CD8br NKT AC	rs2041561	C	G	C	G	0.1523	0.000197269	0.8213	0.785343	FALSE	TRUE	FALSE	ieu-b-4874	7	52580478	0.000164877	373295	0.23	bladder cancer	TRUE	NA	NA	NA	NA	NA	NA	NA	2.59e-06	7	52580478	3652	0.03234	TRUE	2	1	TRUE
CD8br NKT AC	rs2074023	T	C	T	C	-0.1237	-3.92e-05	0.4121	0.388307	FALSE	FALSE	FALSE	ieu-b-4874	11	2325581	0.000139564	373295	0.780001	bladder cancer	TRUE	NA	NA	NA	NA	NA	NA	NA	6.76e-07	11	2325581	3652	0.02486	TRUE	2	1	TRUE
CD8br NKT AC	rs34575510	T	C	T	C	0.2742	-0.00016688	0.0487	0.070478	FALSE	FALSE	FALSE	ieu-b-4874	7	23209757	0.000269949	373295	0.54	bladder cancer	TRUE	NA	NA	NA	NA	NA	NA	NA	2.03e-06	7	23209757	3652	0.05762	TRUE	2	1	TRUE
CD8br NKT AC	rs4745010	G	A	G	A	0.1325	-2.18e-05	0.3159	0.10967	FALSE	FALSE	FALSE	ieu-b-4874	9	73024602	0.000217527	373295	0.92	bladder cancer	TRUE	NA	NA	NA	NA	NA	NA	NA	1.35e-06	9	73024602	3652	0.02737	TRUE	2	1	TRUE
CD8br NKT AC	rs55699240	C	G	C	G	0.1451	5.96e-05	0.1933	0.268796	FALSE	TRUE	FALSE	ieu-b-4874	2	113838725	0.000152766	373295	0.7	bladder cancer	TRUE	NA	NA	NA	NA	NA	NA	NA	4.57e-06	2	113838725	3652	0.03161	TRUE	2	1	TRUE
CD8br NKT AC	rs593435	T	C	T	C	0.1122	-2.87e-05	0.5344	0.509082	FALSE	FALSE	FALSE	ieu-b-4874	7	132417404	0.000135793	373295	0.83	bladder cancer	TRUE	NA	NA	NA	NA	NA	NA	NA	7.25e-06	7	132417404	3652	0.02497	TRUE	2	1	TRUE
CD8br NKT AC	rs61944019	A	G	A	G	-0.7438	0.000380563	0.0052	0.037028	FALSE	FALSE	FALSE	ieu-b-4874	13	27907115	0.00035819	373295	0.29	bladder cancer	TRUE	NA	NA	NA	NA	NA	NA	NA	5.96e-06	13	27907115	3652	0.164	TRUE	2	1	TRUE
CD8br NKT AC	rs7003580	T	C	T	C	0.1169	-8.84e-05	0.5122	0.403736	FALSE	FALSE	FALSE	ieu-b-4874	8	145007534	0.000137915	373295	0.52	bladder cancer	TRUE	NA	NA	NA	NA	NA	NA	NA	2.89e-06	8	145007534	3652	0.02495	TRUE	2	1	TRUE
CD8br NKT AC	rs73109444	T	C	T	C	0.34	0.000625511	0.0279	0.046021	FALSE	FALSE	FALSE	ieu-b-4874	12	47944164	0.000324775	373295	0.0539995	bladder cancer	TRUE	NA	NA	NA	NA	NA	NA	NA	6.01e-06	12	47944164	3652	0.075	TRUE	2	1	TRUE
CD8br NKT AC	rs7756993	C	T	C	T	-0.1338	-9.25e-05	0.5481	0.231607	FALSE	FALSE	FALSE	ieu-b-4874	6	31382133	0.000160333	373295	0.56	bladder cancer	TRUE	NA	NA	NA	NA	NA	NA	NA	2.96e-06	6	31382133	3652	0.02858	TRUE	2	1	TRUE
CD8br NKT AC	rs78099351	C	A	C	A	0.3468	0.000692706	0.0259	0.027755	FALSE	FALSE	FALSE	ieu-b-4874	9	10082863	0.000431105	373295	0.11	bladder cancer	TRUE	NA	NA	NA	NA	NA	NA	NA	5.35e-06	9	10082863	3652	0.0761	TRUE	2	1	TRUE
CD8br NKT AC	rs78268116	T	C	T	C	-0.3964	-0.000203562	0.1097	0.031937	FALSE	FALSE	FALSE	ieu-b-4874	11	112705025	0.000388088	373295	0.6	bladder cancer	TRUE	NA	NA	NA	NA	NA	NA	NA	4.65e-24	11	112705025	3652	0.0389	TRUE	2	1	TRUE
CD8br NKT AC	rs9269109	C	T	C	T	0.1671	-8.96e-05	0.3642	0.697004	FALSE	FALSE	FALSE	ieu-b-4874	6	32443266	0.00014707	373295	0.54	bladder cancer	TRUE	NA	NA	NA	NA	NA	NA	NA	3.31e-08	6	32443266	3652	0.03018	TRUE	2	1	TRUE
CD39+ resting Treg AC	rs10086961	C	T	C	T	-0.1276	-0.000113573	0.2797	0.369064	FALSE	FALSE	FALSE	ieu-b-4874	8	132897157	0.000140657	373295	0.42	bladder cancer	TRUE	NA	NA	NA	NA	NA	NA	NA	4.1e-06	8	132897157	3405	0.02767	TRUE	2	1	TRUE
CD39+ resting Treg AC	rs11718018	C	T	C	T	-0.1138	-0.000252134	0.4137	0.380878	FALSE	FALSE	FALSE	ieu-b-4874	3	60374028	0.000139977	373295	0.0719996	bladder cancer	TRUE	TRUE	rs11718018	rs9868281	C	T	T	C	7.22e-06	3	60364770	3405	0.02532	TRUE	2	1	TRUE
CD39+ resting Treg AC	rs117678654	A	C	A	C	0.6017	-0.000893759	0.0107	0.019674	FALSE	FALSE	FALSE	ieu-b-4874	10	101548054	0.00049577	373295	0.0710003	bladder cancer	TRUE	NA	NA	NA	NA	NA	NA	NA	6.32e-07	10	101548054	3405	0.1206	TRUE	2	1	TRUE
CD39+ resting Treg AC	rs11890666	A	G	A	G	-0.1566	-0.00015278	0.2875	0.215843	FALSE	FALSE	FALSE	ieu-b-4874	2	38745822	0.000166872	373295	0.36	bladder cancer	TRUE	NA	NA	NA	NA	NA	NA	NA	2.88e-08	2	38745822	3405	0.02815	TRUE	2	1	TRUE
CD39+ resting Treg AC	rs12712610	G	A	G	A	0.1912	-0.0002459	0.2972	0.172858	FALSE	FALSE	FALSE	ieu-b-4874	2	38897249	0.000180096	373295	0.17	bladder cancer	TRUE	NA	NA	NA	NA	NA	NA	NA	4.16e-12	2	38897249	3405	0.02749	TRUE	2	1	TRUE
CD39+ resting Treg AC	rs138807420	T	A	T	A	1.024	-0.000292686	0.0034	0.019271	FALSE	TRUE	FALSE	ieu-b-4874	5	6231929	0.000509304	373295	0.57	bladder cancer	TRUE	NA	NA	NA	NA	NA	NA	NA	5.49e-07	5	6231929	3405	0.2041	TRUE	2	1	TRUE
CD39+ resting Treg AC	rs138915779	A	C	A	C	1.188	-8.13e-05	0.0034	0.022222	FALSE	FALSE	FALSE	ieu-b-4874	1	190079170	0.000476153	373295	0.86	bladder cancer	TRUE	NA	NA	NA	NA	NA	NA	NA	1.89e-07	1	190079170	3405	0.2275	TRUE	2	1	TRUE
CD39+ resting Treg AC	rs143132810	C	T	C	T	0.6358	1.3e-05	0.0263	0.019746	FALSE	FALSE	FALSE	ieu-b-4874	10	96890004	0.000498276	373295	0.98	bladder cancer	TRUE	NA	NA	NA	NA	NA	NA	NA	1.07e-15	10	96890004	3405	0.0789	TRUE	2	1	TRUE
CD39+ resting Treg AC	rs17583875	A	G	A	G	2.134	-0.00022637	0.0029	0.020833	FALSE	FALSE	FALSE	ieu-b-4874	1	197924770	0.000473128	373295	0.630001	bladder cancer	TRUE	NA	NA	NA	NA	NA	NA	NA	2.17e-21	1	197924770	3405	0.2233	TRUE	2	1	TRUE
CD39+ resting Treg AC	rs185474383	T	G	T	G	0.5292	-0.000537584	0.021	0.018357	FALSE	FALSE	FALSE	ieu-b-4874	10	96311553	0.00052093	373295	0.3	bladder cancer	TRUE	NA	NA	NA	NA	NA	NA	NA	1.1e-09	10	96311553	3405	0.08658	TRUE	2	1	TRUE
CD39+ resting Treg AC	rs190023756	A	G	A	G	0.6136	0.000159792	0.0101	0.05805	FALSE	FALSE	FALSE	ieu-b-4874	1	199471227	0.000291859	373295	0.58	bladder cancer	TRUE	NA	NA	NA	NA	NA	NA	NA	4.24e-07	1	199471227	3405	0.1211	TRUE	2	1	TRUE
CD39+ resting Treg AC	rs192831774	T	A	T	A	0.4945	-0.00113242	0.0311	0.016016	FALSE	TRUE	FALSE	ieu-b-4874	10	95387682	0.000590891	373295	0.0549997	bladder cancer	TRUE	NA	NA	NA	NA	NA	NA	NA	1e-11	10	95387682	3405	0.0724	TRUE	2	1	TRUE
CD39+ resting Treg AC	rs2326054	C	T	C	T	-0.2253	-6.31e-05	0.0626	0.127456	FALSE	FALSE	FALSE	ieu-b-4874	20	3033175	0.000203714	373295	0.760001	bladder cancer	TRUE	NA	NA	NA	NA	NA	NA	NA	7.27e-06	20	3033175	3405	0.05016	TRUE	2	1	TRUE
CD39+ resting Treg AC	rs35909109	T	C	T	C	0.3601	0.00010094	0.0464	0.027726	FALSE	FALSE	FALSE	ieu-b-4874	10	98014850	0.000411416	373295	0.81	bladder cancer	TRUE	NA	NA	NA	NA	NA	NA	NA	3.22e-09	10	98014850	3405	0.06066	TRUE	2	1	TRUE
CD39+ resting Treg AC	rs4321083	A	G	A	G	0.1371	-0.000283732	0.2137	0.255382	FALSE	FALSE	FALSE	ieu-b-4874	13	84031916	0.00015678	373295	0.0700003	bladder cancer	TRUE	NA	NA	NA	NA	NA	NA	NA	8.24e-06	13	84031916	3405	0.03069	TRUE	2	1	TRUE
CD39+ resting Treg AC	rs56158191	T	C	T	C	-0.3521	-0.000109231	0.0266	0.043345	FALSE	FALSE	FALSE	ieu-b-4874	19	57436943	0.000331512	373295	0.74	bladder cancer	TRUE	NA	NA	NA	NA	NA	NA	NA	8.19e-06	19	57436943	3405	0.07883	TRUE	2	1	TRUE
CD39+ resting Treg AC	rs62421103	T	G	T	G	0.2238	-0.000224604	0.0712	0.061952	FALSE	FALSE	FALSE	ieu-b-4874	6	113160344	0.00028088	373295	0.42	bladder cancer	TRUE	NA	NA	NA	NA	NA	NA	NA	5.77e-06	6	113160344	3405	0.04927	TRUE	2	1	TRUE
CD39+ resting Treg AC	rs6488275	T	C	T	C	-0.1716	-0.00029786	0.8774	0.933665	FALSE	FALSE	FALSE	ieu-b-4874	12	10379180	0.000274265	373295	0.28	bladder cancer	TRUE	NA	NA	NA	NA	NA	NA	NA	4.56e-06	12	10379180	3405	0.03738	TRUE	2	1	TRUE
CD39+ resting Treg AC	rs7079761	A	G	A	G	0.7212	-0.000349609	0.0554	0.014999	FALSE	FALSE	FALSE	ieu-b-4874	10	97842115	0.000557964	373295	0.53	bladder cancer	TRUE	NA	NA	NA	NA	NA	NA	NA	3.75e-37	10	97842115	3405	0.05595	TRUE	2	1	TRUE
CD39+ resting Treg AC	rs72809762	T	C	T	C	0.4336	0.000228127	0.0675	0.037281	FALSE	FALSE	FALSE	ieu-b-4874	10	97294154	0.000358143	373295	0.52	bladder cancer	TRUE	NA	NA	NA	NA	NA	NA	NA	3.04e-18	10	97294154	3405	0.04951	TRUE	2	1	TRUE
CD39+ resting Treg AC	rs77520132	A	G	A	G	0.5828	-1.32e-05	0.046	0.012152	FALSE	FALSE	FALSE	ieu-b-4874	10	98160835	0.000618805	373295	0.98	bladder cancer	TRUE	NA	NA	NA	NA	NA	NA	NA	1.03e-22	10	98160835	3405	0.05899	TRUE	2	1	TRUE
CD39+ resting Treg AC	rs78096816	C	A	C	A	1.521	-5.14e-06	0.0013	0.04034	FALSE	FALSE	FALSE	ieu-b-4874	2	53370856	0.000355799	373295	0.99	bladder cancer	TRUE	NA	NA	NA	NA	NA	NA	NA	3.85e-06	2	53370856	3405	0.3287	TRUE	2	1	TRUE
CD39+ resting Treg AC	rs78654607	G	C	G	C	-0.3394	0.000720349	0.0329	0.040433	FALSE	TRUE	FALSE	ieu-b-4874	16	83070118	0.000342937	373295	0.0359998	bladder cancer	TRUE	NA	NA	NA	NA	NA	NA	NA	1.38e-06	16	83070118	3405	0.07017	TRUE	2	1	TRUE
CD39+ resting Treg AC	rs78843390	T	C	T	C	0.6066	1.39e-06	0.0094	0.020403	FALSE	FALSE	FALSE	ieu-b-4874	12	130031612	0.000478154	373295	1	bladder cancer	TRUE	NA	NA	NA	NA	NA	NA	NA	3.29e-06	12	130031612	3405	0.1302	TRUE	2	1	TRUE
CD39+ resting Treg % CD4 Treg	rs10086961	C	T	C	T	-0.1275	-0.000113573	0.28	0.369064	FALSE	FALSE	FALSE	ieu-b-4874	8	132897157	0.000140657	373295	0.42	bladder cancer	TRUE	NA	NA	NA	NA	NA	NA	NA	3.3e-06	8	132897157	3437	0.02736	TRUE	2	1	TRUE
CD39+ resting Treg % CD4 Treg	rs113264169	T	C	T	C	0.2772	-0.000481806	0.0418	0.01617	FALSE	FALSE	FALSE	ieu-b-4874	7	46328226	0.000583625	373295	0.41	bladder cancer	TRUE	NA	NA	NA	NA	NA	NA	NA	9.87e-06	7	46328226	3437	0.06262	TRUE	2	1	TRUE
CD39+ resting Treg % CD4 Treg	rs113435341	G	A	G	A	2.267	0.000269296	0.0032	0.019043	FALSE	FALSE	FALSE	ieu-b-4874	1	198151688	0.000520151	373295	0.6	bladder cancer	TRUE	NA	NA	NA	NA	NA	NA	NA	3.79e-25	1	198151688	3437	0.2171	TRUE	2	1	TRUE
CD39+ resting Treg % CD4 Treg	rs11579717	A	G	A	G	1.718	0.000269345	0.0044	0.048262	FALSE	FALSE	FALSE	ieu-b-4874	1	199999121	0.000323136	373295	0.4	bladder cancer	TRUE	NA	NA	NA	NA	NA	NA	NA	1.35e-20	1	199999121	3437	0.1835	TRUE	2	1	TRUE
CD39+ resting Treg % CD4 Treg	rs115977640	A	C	A	C	0.6189	-0.000504144	0.0077	0.023827	FALSE	FALSE	FALSE	ieu-b-4874	2	160238519	0.000443483	373295	0.26	bladder cancer	TRUE	NA	NA	NA	NA	NA	NA	NA	3.83e-06	2	160238519	3437	0.1337	TRUE	2	1	TRUE
CD39+ resting Treg % CD4 Treg	rs11890666	A	G	A	G	-0.1612	-0.00015278	0.2866	0.215843	FALSE	FALSE	FALSE	ieu-b-4874	2	38745822	0.000166872	373295	0.36	bladder cancer	TRUE	NA	NA	NA	NA	NA	NA	NA	7.94e-09	2	38745822	3437	0.02787	TRUE	2	1	TRUE
CD39+ resting Treg % CD4 Treg	rs12258674	T	A	T	A	-0.1514	-0.000147154	0.165	0.152899	FALSE	TRUE	FALSE	ieu-b-4874	10	68394054	0.000189125	373295	0.44	bladder cancer	TRUE	NA	NA	NA	NA	NA	NA	NA	8.81e-06	10	68394054	3437	0.03401	TRUE	2	1	TRUE
CD39+ resting Treg % CD4 Treg	rs12518588	G	T	G	T	0.1241	-0.000130016	0.412	0.532313	FALSE	FALSE	FALSE	ieu-b-4874	5	85325148	0.000135588	373295	0.34	bladder cancer	TRUE	NA	NA	NA	NA	NA	NA	NA	9.15e-07	5	85325148	3437	0.02523	TRUE	2	1	TRUE
CD39+ resting Treg % CD4 Treg	rs12712610	G	A	G	A	0.201	-0.0002459	0.2975	0.172858	FALSE	FALSE	FALSE	ieu-b-4874	2	38897249	0.000180096	373295	0.17	bladder cancer	TRUE	NA	NA	NA	NA	NA	NA	NA	1.83e-13	2	38897249	3437	0.02719	TRUE	2	1	TRUE
CD39+ resting Treg % CD4 Treg	rs12778837	C	T	C	T	0.1965	0.000147092	0.3595	0.395808	FALSE	FALSE	FALSE	ieu-b-4874	10	96999787	0.0001383	373295	0.29	bladder cancer	TRUE	TRUE	rs12778837	rs7909905	C	T	T	C	1.55e-13	10	96998744	3437	0.02651	TRUE	2	1	TRUE
CD39+ resting Treg % CD4 Treg	rs1410600	T	C	T	C	-0.2216	8.44e-05	0.4069	0.497234	FALSE	FALSE	FALSE	ieu-b-4874	10	97070694	0.000135311	373295	0.53	bladder cancer	TRUE	NA	NA	NA	NA	NA	NA	NA	3.59e-18	10	97070694	3437	0.02536	TRUE	2	1	TRUE
CD39+ resting Treg % CD4 Treg	rs150956189	C	T	C	T	2.837	-0.000473786	0.0003	0.020593	FALSE	FALSE	FALSE	ieu-b-4874	1	214625781	0.000511386	373295	0.35	bladder cancer	TRUE	NA	NA	NA	NA	NA	NA	NA	5.74e-06	1	214625781	3437	0.6244	TRUE	2	1	TRUE
CD39+ resting Treg % CD4 Treg	rs17111341	C	T	C	T	0.6853	-8.24e-05	0.0666	0.024994	FALSE	FALSE	FALSE	ieu-b-4874	10	97881031	0.000432907	373295	0.85	bladder cancer	TRUE	NA	NA	NA	NA	NA	NA	NA	1.86e-41	10	97881031	3437	0.05013	TRUE	2	1	TRUE
CD39+ resting Treg % CD4 Treg	rs182702572	A	C	A	C	0.5464	0.000285362	0.0295	0.011117	FALSE	FALSE	FALSE	ieu-b-4874	10	96658384	0.000666366	373295	0.67	bladder cancer	TRUE	NA	NA	NA	NA	NA	NA	NA	1.95e-13	10	96658384	3437	0.07402	TRUE	2	1	TRUE
CD39+ resting Treg % CD4 Treg	rs2326054	C	T	C	T	-0.2311	-6.31e-05	0.0628	0.127456	FALSE	FALSE	FALSE	ieu-b-4874	20	3033175	0.000203714	373295	0.760001	bladder cancer	TRUE	NA	NA	NA	NA	NA	NA	NA	3.35e-06	20	3033175	3437	0.04963	TRUE	2	1	TRUE
CD39+ resting Treg % CD4 Treg	rs35909109	T	C	T	C	0.3811	0.00010094	0.0464	0.027726	FALSE	FALSE	FALSE	ieu-b-4874	10	98014850	0.000411416	373295	0.81	bladder cancer	TRUE	NA	NA	NA	NA	NA	NA	NA	2.3e-10	10	98014850	3437	0.05993	TRUE	2	1	TRUE
CD39+ resting Treg % CD4 Treg	rs4918969	A	G	A	G	0.8426	-4.96e-05	0.4267	0.505244	FALSE	FALSE	FALSE	ieu-b-4874	10	97562938	0.000135175	373295	0.709999	bladder cancer	TRUE	NA	NA	NA	NA	NA	NA	NA	1e-200	10	97562938	3437	0.02078	TRUE	2	1	TRUE
CD39+ resting Treg % CD4 Treg	rs5755717	C	A	C	A	0.1309	9.72e-06	0.22	0.307826	FALSE	FALSE	FALSE	ieu-b-4874	22	35786713	0.000147977	373295	0.95	bladder cancer	TRUE	NA	NA	NA	NA	NA	NA	NA	9.81e-06	22	35786713	3437	0.02956	TRUE	2	1	TRUE
CD39+ resting Treg % CD4 Treg	rs61821998	A	T	A	T	0.4208	0.000182591	0.0215	0.013666	FALSE	TRUE	FALSE	ieu-b-4874	1	193263354	0.000581946	373295	0.75	bladder cancer	TRUE	NA	NA	NA	NA	NA	NA	NA	6.01e-07	1	193263354	3437	0.08415	TRUE	2	1	TRUE
CD39+ resting Treg % CD4 Treg	rs7310854	C	T	C	T	0.1246	0.00015205	0.2827	0.243095	FALSE	FALSE	FALSE	ieu-b-4874	12	52495599	0.000164112	373295	0.35	bladder cancer	TRUE	NA	NA	NA	NA	NA	NA	NA	7.8e-06	12	52495599	3437	0.02782	TRUE	2	1	TRUE
CD39+ resting Treg % CD4 Treg	rs77520132	A	G	A	G	0.6067	-1.32e-05	0.0464	0.012152	FALSE	FALSE	FALSE	ieu-b-4874	10	98160835	0.000618805	373295	0.98	bladder cancer	TRUE	NA	NA	NA	NA	NA	NA	NA	4.44e-25	10	98160835	3437	0.05819	TRUE	2	1	TRUE
CD39+ resting Treg % CD4 Treg	rs78096816	C	A	C	A	1.581	-5.14e-06	0.0013	0.04034	FALSE	FALSE	FALSE	ieu-b-4874	2	53370856	0.000355799	373295	0.99	bladder cancer	TRUE	NA	NA	NA	NA	NA	NA	NA	1.47e-06	2	53370856	3437	0.3277	TRUE	2	1	TRUE
CD39+ resting Treg % CD4 Treg	rs78654607	G	C	G	C	-0.3327	0.000720349	0.033	0.040433	FALSE	TRUE	FALSE	ieu-b-4874	16	83070118	0.000342937	373295	0.0359998	bladder cancer	TRUE	NA	NA	NA	NA	NA	NA	NA	1.53e-06	16	83070118	3437	0.06909	TRUE	2	1	TRUE
CD39+ resting Treg % CD4 Treg	rs78809247	T	C	T	C	-0.3668	-0.000211175	0.0239	0.032114	FALSE	FALSE	FALSE	ieu-b-4874	8	4556480	0.000387466	373295	0.59	bladder cancer	TRUE	NA	NA	NA	NA	NA	NA	NA	6.37e-06	8	4556480	3437	0.08113	TRUE	2	1	TRUE
CD39+ resting Treg % CD4 Treg	rs78843390	T	C	T	C	0.6146	1.39e-06	0.0093	0.020403	FALSE	FALSE	FALSE	ieu-b-4874	12	130031612	0.000478154	373295	1	bladder cancer	TRUE	NA	NA	NA	NA	NA	NA	NA	2.18e-06	12	130031612	3437	0.1296	TRUE	2	1	TRUE
CD39+ resting Treg % CD4 Treg	rs7963011	T	C	T	C	0.1209	0.00012009	0.2733	0.293459	FALSE	FALSE	FALSE	ieu-b-4874	12	10389074	0.000149707	373295	0.42	bladder cancer	TRUE	NA	NA	NA	NA	NA	NA	NA	9.09e-06	12	10389074	3437	0.02721	TRUE	2	1	TRUE
CD39+ resting Treg % CD4 Treg	rs884599	G	A	G	A	-0.1114	-4.27e-05	0.4491	0.335994	FALSE	FALSE	FALSE	ieu-b-4874	5	171129907	0.000144287	373295	0.77	bladder cancer	TRUE	NA	NA	NA	NA	NA	NA	NA	6.84e-06	5	171129907	3437	0.02473	TRUE	2	1	TRUE
CD127 on CD45RA+ CD4+	rs10089520	C	T	C	T	-0.18	-9.3e-05	0.1387	0.196307	FALSE	FALSE	FALSE	ieu-b-4874	8	11686089	0.000170149	373295	0.58	bladder cancer	TRUE	NA	NA	NA	NA	NA	NA	NA	6.23e-06	8	11686089	2920	0.03977	TRUE	2	1	TRUE
CD127 on CD45RA+ CD4+	rs11567754	A	T	A	T	-0.2975	-0.000169525	0.105	0.145657	FALSE	TRUE	FALSE	ieu-b-4874	5	35872190	0.000191774	373295	0.38	bladder cancer	TRUE	NA	NA	NA	NA	NA	NA	NA	8.08e-12	5	35872190	2920	0.04334	TRUE	2	1	TRUE
CD127 on CD45RA+ CD4+	rs138540869	T	C	T	C	0.3883	-0.000361585	0.0276	0.01506	FALSE	FALSE	FALSE	ieu-b-4874	5	62602530	0.000581527	373295	0.53	bladder cancer	TRUE	NA	NA	NA	NA	NA	NA	NA	4.28e-06	5	62602530	2920	0.0843	TRUE	2	1	TRUE
CD127 on CD45RA+ CD4+	rs140742144	T	C	T	C	0.5687	-9.42e-05	0.0115	0.071517	FALSE	FALSE	FALSE	ieu-b-4874	1	210874433	0.000268872	373295	0.73	bladder cancer	TRUE	NA	NA	NA	NA	NA	NA	NA	7.77e-06	1	210874433	2920	0.127	TRUE	2	1	TRUE
CD127 on CD45RA+ CD4+	rs144125132	C	T	C	T	0.468	0.000433375	0.018	0.016964	FALSE	FALSE	FALSE	ieu-b-4874	5	160293643	0.000541733	373295	0.42	bladder cancer	TRUE	NA	NA	NA	NA	NA	NA	NA	8.02e-06	5	160293643	2920	0.1046	TRUE	2	1	TRUE
CD127 on CD45RA+ CD4+	rs1573735	T	C	T	C	-0.2069	-0.000130226	0.3262	0.576918	FALSE	FALSE	FALSE	ieu-b-4874	16	423696	0.000136634	373295	0.34	bladder cancer	TRUE	NA	NA	NA	NA	NA	NA	NA	4.02e-13	16	423696	2920	0.02839	TRUE	2	1	TRUE
CD127 on CD45RA+ CD4+	rs180717968	G	A	G	A	0.4525	-0.00132123	0.0214	0.015011	FALSE	FALSE	FALSE	ieu-b-4874	2	204124526	0.000564129	373295	0.0189998	bladder cancer	TRUE	NA	NA	NA	NA	NA	NA	NA	1.26e-06	2	204124526	2920	0.09317	TRUE	2	1	TRUE
CD127 on CD45RA+ CD4+	rs2059578	C	T	C	T	-0.3878	-7.12e-05	0.026	0.036606	FALSE	FALSE	FALSE	ieu-b-4874	11	60066799	0.000370633	373295	0.85	bladder cancer	TRUE	NA	NA	NA	NA	NA	NA	NA	6.61e-06	11	60066799	2920	0.0859	TRUE	2	1	TRUE
CD127 on CD45RA+ CD4+	rs3129891	A	G	A	G	-0.2373	-1e-05	0.2223	0.209779	FALSE	FALSE	FALSE	ieu-b-4874	6	32415080	0.000165956	373295	0.95	bladder cancer	TRUE	NA	NA	NA	NA	NA	NA	NA	5.88e-12	6	32415080	2920	0.03434	TRUE	2	1	TRUE
CD127 on CD45RA+ CD4+	rs34285518	C	T	C	T	-0.1501	-0.000103214	0.2152	0.378105	FALSE	FALSE	FALSE	ieu-b-4874	10	6136107	0.000139925	373295	0.46	bladder cancer	TRUE	NA	NA	NA	NA	NA	NA	NA	5.55e-06	10	6136107	2920	0.03299	TRUE	2	1	TRUE
CD127 on CD45RA+ CD4+	rs6571878	C	T	C	T	0.2105	-0.000279076	0.905	0.819267	FALSE	FALSE	FALSE	ieu-b-4874	14	39358776	0.000177545	373295	0.12	bladder cancer	TRUE	TRUE	rs6571878	rs12889216	T	C	C	T	4.92e-06	14	39350523	2920	0.046	TRUE	2	1	TRUE
CD127 on CD45RA+ CD4+	rs6691053	T	C	T	C	0.1437	-0.000149932	0.236	0.215104	FALSE	FALSE	FALSE	ieu-b-4874	1	173868955	0.000164851	373295	0.36	bladder cancer	TRUE	NA	NA	NA	NA	NA	NA	NA	7.68e-06	1	173868955	2920	0.03207	TRUE	2	1	TRUE
CD127 on CD45RA+ CD4+	rs6727096	T	A	T	A	-0.1632	-0.000181261	0.1872	0.204388	FALSE	TRUE	FALSE	ieu-b-4874	2	161307677	0.00016868	373295	0.28	bladder cancer	TRUE	NA	NA	NA	NA	NA	NA	NA	4.1e-06	2	161307677	2920	0.03537	TRUE	2	1	TRUE
CD127 on CD45RA+ CD4+	rs67627362	G	A	G	A	-0.2003	-0.000373544	0.1017	0.123203	FALSE	FALSE	FALSE	ieu-b-4874	12	63155497	0.000206823	373295	0.0710003	bladder cancer	TRUE	NA	NA	NA	NA	NA	NA	NA	7.3e-06	12	63155497	2920	0.04459	TRUE	2	1	TRUE
CD127 on CD45RA+ CD4+	rs6901175	A	G	A	G	-0.1812	-0.000185825	0.2245	0.125159	FALSE	FALSE	FALSE	ieu-b-4874	6	32198527	0.000204483	373295	0.36	bladder cancer	TRUE	NA	NA	NA	NA	NA	NA	NA	1.26e-07	6	32198527	2920	0.03419	TRUE	2	1	TRUE
CD127 on CD45RA+ CD4+	rs7046475	C	T	C	T	0.1729	0.000124944	0.8582	0.782303	FALSE	FALSE	FALSE	ieu-b-4874	9	21582326	0.000164379	373295	0.450001	bladder cancer	TRUE	NA	NA	NA	NA	NA	NA	NA	9.31e-06	9	21582326	2920	0.03894	TRUE	2	1	TRUE
CD127 on CD45RA+ CD4+	rs7115390	C	T	C	T	0.1814	0.000144346	0.1332	0.164618	FALSE	FALSE	FALSE	ieu-b-4874	11	10757993	0.000182152	373295	0.43	bladder cancer	TRUE	NA	NA	NA	NA	NA	NA	NA	7.27e-06	11	10757993	2920	0.04036	TRUE	2	1	TRUE
CD127 on CD45RA+ CD4+	rs7264992	T	C	T	C	-0.1261	-3.07e-05	0.4046	0.405867	FALSE	FALSE	FALSE	ieu-b-4874	20	57814866	0.000137935	373295	0.82	bladder cancer	TRUE	NA	NA	NA	NA	NA	NA	NA	4.95e-06	20	57814866	2920	0.02755	TRUE	2	1	TRUE
CD127 on CD45RA+ CD4+	rs76683776	C	T	C	T	-0.8253	0.000441251	0.0051	0.028128	FALSE	FALSE	FALSE	ieu-b-4874	16	20131662	0.000408682	373295	0.28	bladder cancer	TRUE	NA	NA	NA	NA	NA	NA	NA	9.73e-06	16	20131662	2920	0.1863	TRUE	2	1	TRUE
CD127 on CD45RA+ CD4+	rs9271772	A	G	A	G	0.2608	5.68e-05	0.7752	0.819732	FALSE	FALSE	FALSE	ieu-b-4874	6	32594309	0.000175801	373295	0.75	bladder cancer	TRUE	TRUE	rs9271772	rs9271774	G	A	A	C	2.23e-13	6	32594275	2920	0.0354	TRUE	2	1	TRUE
CD127 on CD45RA+ CD4+	rs930760	T	C	T	C	0.129	-0.000239515	0.5717	0.636263	FALSE	FALSE	FALSE	ieu-b-4874	2	20806336	0.000141495	373295	0.0909997	bladder cancer	TRUE	NA	NA	NA	NA	NA	NA	NA	3.94e-06	2	20806336	2920	0.02791	TRUE	2	1	TRUE
HVEM on naive CD8br	rs10090960	G	A	G	A	-0.1865	-0.000176798	0.4499	0.405539	FALSE	FALSE	FALSE	ieu-b-4874	8	136809038	0.000137882	373295	0.2	bladder cancer	TRUE	NA	NA	NA	NA	NA	NA	NA	3.82e-06	8	136809038	1247	0.04018	TRUE	2	1	TRUE
HVEM on naive CD8br	rs112421400	T	C	T	C	-0.2471	0.000375144	0.1997	0.049876	FALSE	FALSE	FALSE	ieu-b-4874	6	28205826	0.000310817	373295	0.23	bladder cancer	TRUE	NA	NA	NA	NA	NA	NA	NA	4.47e-06	6	28205826	1247	0.05362	TRUE	2	1	TRUE
HVEM on naive CD8br	rs118151702	T	C	T	C	0.4464	-0.000579701	0.0421	0.046271	FALSE	FALSE	FALSE	ieu-b-4874	8	138502532	0.000324489	373295	0.0739997	bladder cancer	TRUE	NA	NA	NA	NA	NA	NA	NA	4.29e-06	8	138502532	1247	0.09669	TRUE	2	1	TRUE
HVEM on naive CD8br	rs11981290	A	G	A	G	-0.2026	9.44e-05	0.2983	0.260883	FALSE	FALSE	FALSE	ieu-b-4874	7	154686456	0.000154504	373295	0.54	bladder cancer	TRUE	NA	NA	NA	NA	NA	NA	NA	4.28e-06	7	154686456	1247	0.04387	TRUE	2	1	TRUE
HVEM on naive CD8br	rs12476985	C	T	C	T	0.8901	-0.00060472	0.0112	0.033242	FALSE	FALSE	FALSE	ieu-b-4874	2	184183623	0.000377075	373295	0.11	bladder cancer	TRUE	NA	NA	NA	NA	NA	NA	NA	5.91e-06	2	184183623	1247	0.1957	TRUE	2	1	TRUE
HVEM on naive CD8br	rs13013216	A	G	A	G	0.2037	6.26e-05	0.2702	0.28718	FALSE	FALSE	FALSE	ieu-b-4874	2	153797688	0.000163328	373295	0.7	bladder cancer	TRUE	NA	NA	NA	NA	NA	NA	NA	7.06e-06	2	153797688	1247	0.04515	TRUE	2	1	TRUE
HVEM on naive CD8br	rs1353750	C	T	C	T	-0.3769	-0.000165692	0.9395	0.852115	FALSE	FALSE	FALSE	ieu-b-4874	12	17510433	0.000192172	373295	0.39	bladder cancer	TRUE	NA	NA	NA	NA	NA	NA	NA	6.51e-06	12	17510433	1247	0.08324	TRUE	2	1	TRUE
HVEM on naive CD8br	rs142774716	A	T	A	T	1.213	0.000205227	0.0052	0.01602	FALSE	TRUE	FALSE	ieu-b-4874	1	95096608	0.000555889	373295	0.709999	bladder cancer	TRUE	NA	NA	NA	NA	NA	NA	NA	5.29e-06	1	95096608	1247	0.2652	TRUE	2	1	TRUE
HVEM on naive CD8br	rs17105684	A	G	A	G	-0.4536	-0.000122059	0.0405	0.027115	FALSE	FALSE	FALSE	ieu-b-4874	11	106267999	0.000418475	373295	0.77	bladder cancer	TRUE	NA	NA	NA	NA	NA	NA	NA	4.98e-06	11	106267999	1247	0.09893	TRUE	2	1	TRUE
HVEM on naive CD8br	rs17532418	A	C	A	C	1.399	0.000201604	0.0044	0.024712	FALSE	FALSE	FALSE	ieu-b-4874	7	121741943	0.000441466	373295	0.649999	bladder cancer	TRUE	NA	NA	NA	NA	NA	NA	NA	2.14e-06	7	121741943	1247	0.2937	TRUE	2	1	TRUE
HVEM on naive CD8br	rs2234161	T	C	T	C	0.2305	-1.2e-05	0.593	0.501276	FALSE	FALSE	FALSE	ieu-b-4874	1	2497641	0.000135304	373295	0.93	bladder cancer	TRUE	TRUE	rs2234161	rs7550231	T	C	A	G	4.25e-09	1	2491205	1247	0.03896	TRUE	2	1	TRUE
HVEM on naive CD8br	rs28422844	G	A	G	A	0.5661	0.000182908	0.0257	0.022729	FALSE	FALSE	FALSE	ieu-b-4874	1	28831071	0.000461183	373295	0.69	bladder cancer	TRUE	NA	NA	NA	NA	NA	NA	NA	5.45e-06	1	28831071	1247	0.124	TRUE	2	1	TRUE
HVEM on naive CD8br	rs2844594	A	G	A	G	-0.276	0.000137783	0.3841	0.199216	FALSE	FALSE	FALSE	ieu-b-4874	6	31258393	0.000170746	373295	0.42	bladder cancer	TRUE	NA	NA	NA	NA	NA	NA	NA	2.44e-10	6	31258393	1247	0.04325	TRUE	2	1	TRUE
HVEM on naive CD8br	rs28904611	G	A	G	A	0.4581	1e-05	0.0481	0.03694	FALSE	FALSE	FALSE	ieu-b-4874	8	89243591	0.000361724	373295	0.98	bladder cancer	TRUE	NA	NA	NA	NA	NA	NA	NA	2.03e-06	8	89243591	1247	0.09597	TRUE	2	1	TRUE
HVEM on naive CD8br	rs2964678	T	C	T	C	-0.29	0.000120165	0.1379	0.180538	FALSE	FALSE	FALSE	ieu-b-4874	5	116104935	0.000176328	373295	0.5	bladder cancer	TRUE	NA	NA	NA	NA	NA	NA	NA	1.26e-06	5	116104935	1247	0.05954	TRUE	2	1	TRUE
HVEM on naive CD8br	rs4898532	C	T	C	T	-0.1882	-2.34e-05	0.4487	0.470832	FALSE	FALSE	FALSE	ieu-b-4874	12	50227988	0.000135502	373295	0.86	bladder cancer	TRUE	TRUE	rs4898532	rs7953539	C	T	A	G	2.93e-06	12	50223579	1247	0.04006	TRUE	2	1	TRUE
HVEM on naive CD8br	rs561768	G	A	G	A	-0.1931	-0.000222642	0.6383	0.766509	FALSE	FALSE	FALSE	ieu-b-4874	6	168203927	0.000160056	373295	0.16	bladder cancer	TRUE	NA	NA	NA	NA	NA	NA	NA	4.41e-06	6	168203927	1247	0.04187	TRUE	2	1	TRUE
HVEM on naive CD8br	rs73851787	G	A	G	A	0.5851	0.000129775	0.0237	0.065265	FALSE	FALSE	FALSE	ieu-b-4874	4	117567589	0.00027733	373295	0.64	bladder cancer	TRUE	NA	NA	NA	NA	NA	NA	NA	8.51e-06	4	117567589	1247	0.1309	TRUE	2	1	TRUE
HVEM on CD8br	rs10090960	G	A	G	A	-0.1987	-0.000176798	0.4499	0.405539	FALSE	FALSE	FALSE	ieu-b-4874	8	136809038	0.000137882	373295	0.2	bladder cancer	TRUE	NA	NA	NA	NA	NA	NA	NA	9.11e-07	8	136809038	1247	0.04027	TRUE	2	1	TRUE
HVEM on CD8br	rs10508717	A	G	A	G	-0.1852	-8.78e-06	0.488	0.453609	FALSE	FALSE	FALSE	ieu-b-4874	10	26672328	0.000135698	373295	0.95	bladder cancer	TRUE	NA	NA	NA	NA	NA	NA	NA	5.84e-06	10	26672328	1247	0.04069	TRUE	2	1	TRUE
HVEM on CD8br	rs117761782	T	G	T	G	-0.4141	-0.00039038	0.0517	0.029472	FALSE	FALSE	FALSE	ieu-b-4874	8	22024980	0.000411096	373295	0.34	bladder cancer	TRUE	NA	NA	NA	NA	NA	NA	NA	9.11e-06	8	22024980	1247	0.09294	TRUE	2	1	TRUE
HVEM on CD8br	rs150482210	T	A	T	A	0.632	0.000205333	0.02	0.026714	FALSE	TRUE	FALSE	ieu-b-4874	3	135398834	0.000436321	373295	0.64	bladder cancer	TRUE	NA	NA	NA	NA	NA	NA	NA	5e-06	3	135398834	1247	0.1378	TRUE	2	1	TRUE
HVEM on CD8br	rs16834073	C	T	C	T	-0.5241	0.000187142	0.0397	0.048518	FALSE	FALSE	FALSE	ieu-b-4874	2	154560519	0.000318687	373295	0.56	bladder cancer	TRUE	NA	NA	NA	NA	NA	NA	NA	3.49e-07	2	154560519	1247	0.1023	TRUE	2	1	TRUE
HVEM on CD8br	rs182735817	A	G	A	G	0.6466	0.000489358	0.02	0.016161	FALSE	FALSE	FALSE	ieu-b-4874	2	129316586	0.000572441	373295	0.39	bladder cancer	TRUE	NA	NA	NA	NA	NA	NA	NA	9.97e-06	2	129316586	1247	0.1458	TRUE	2	1	TRUE
HVEM on CD8br	rs2219729	C	T	C	T	-0.192	-7.12e-05	0.2955	0.285858	FALSE	FALSE	FALSE	ieu-b-4874	5	101440775	0.000150052	373295	0.64	bladder cancer	TRUE	NA	NA	NA	NA	NA	NA	NA	9.06e-06	5	101440775	1247	0.04308	TRUE	2	1	TRUE
HVEM on CD8br	rs2227313	C	T	C	T	0.2584	2.89e-05	0.5754	0.495616	FALSE	FALSE	FALSE	ieu-b-4874	1	2487766	0.000135291	373295	0.83	bladder cancer	TRUE	NA	NA	NA	NA	NA	NA	NA	4.9e-11	1	2487766	1247	0.03896	TRUE	2	1	TRUE
HVEM on CD8br	rs2338998	C	T	C	T	0.2289	-0.000163015	0.2963	0.353659	FALSE	FALSE	FALSE	ieu-b-4874	17	32670901	0.000141713	373295	0.25	bladder cancer	TRUE	NA	NA	NA	NA	NA	NA	NA	1.39e-07	17	32670901	1247	0.04321	TRUE	2	1	TRUE
HVEM on CD8br	rs35211801	T	C	T	C	1.214	0.00090846	0.0056	0.011278	FALSE	FALSE	FALSE	ieu-b-4874	5	80948384	0.000675175	373295	0.18	bladder cancer	TRUE	NA	NA	NA	NA	NA	NA	NA	8.28e-06	5	80948384	1247	0.2711	TRUE	2	1	TRUE
HVEM on CD8br	rs61731213	A	G	A	G	1.062	-0.000311166	0.0072	0.016824	FALSE	FALSE	FALSE	ieu-b-4874	1	203690537	0.000525706	373295	0.55	bladder cancer	TRUE	NA	NA	NA	NA	NA	NA	NA	5.27e-06	1	203690537	1247	0.2322	TRUE	2	1	TRUE
HVEM on CD8br	rs7210730	A	G	A	G	0.2024	-8.21e-05	0.7285	0.727305	FALSE	FALSE	FALSE	ieu-b-4874	17	78629025	0.000151792	373295	0.59	bladder cancer	TRUE	NA	NA	NA	NA	NA	NA	NA	6.94e-06	17	78629025	1247	0.04484	TRUE	2	1	TRUE
HVEM on CD8br	rs75214693	T	C	T	C	-0.4794	0.000276009	0.0445	0.019867	FALSE	FALSE	FALSE	ieu-b-4874	4	93244732	0.000500736	373295	0.58	bladder cancer	TRUE	NA	NA	NA	NA	NA	NA	NA	1.79e-06	4	93244732	1247	0.09988	TRUE	2	1	TRUE
HVEM on CD8br	rs80126152	C	A	C	A	0.7684	0.00021551	0.0156	0.0212	FALSE	FALSE	FALSE	ieu-b-4874	7	83616304	0.000486035	373295	0.66	bladder cancer	TRUE	NA	NA	NA	NA	NA	NA	NA	1.61e-06	7	83616304	1247	0.1594	TRUE	2	1	TRUE
HVEM on CD8br	rs9267111	G	A	G	A	-0.2692	-0.000119758	0.172	0.368431	FALSE	FALSE	FALSE	ieu-b-4874	6	31424778	0.000139858	373295	0.39	bladder cancer	TRUE	TRUE	rs9267111	rs3130475	G	A	A	G	2.44e-06	6	31416379	1247	0.05685	TRUE	2	1	TRUE
HVEM on CD8br	rs9966806	T	C	T	C	0.1769	-0.000137735	0.5509	0.383236	FALSE	FALSE	FALSE	ieu-b-4874	18	64825431	0.000138994	373295	0.32	bladder cancer	TRUE	NA	NA	NA	NA	NA	NA	NA	9.31e-06	18	64825431	1247	0.03974	TRUE	2	1	TRUE
CD8 on CD28+ CD45RA+ CD8br	rs10091979	A	G	A	G	0.1235	4.18e-05	0.3844	0.366614	FALSE	FALSE	FALSE	ieu-b-4874	8	124435289	0.000140623	373295	0.77	bladder cancer	TRUE	NA	NA	NA	NA	NA	NA	NA	6.03e-06	8	124435289	2920	0.02724	TRUE	2	1	TRUE
CD8 on CD28+ CD45RA+ CD8br	rs10205992	T	C	T	C	-0.2955	0.000162478	0.4729	0.508883	FALSE	FALSE	FALSE	ieu-b-4874	2	87279109	0.000139023	373295	0.24	bladder cancer	TRUE	NA	NA	NA	NA	NA	NA	NA	3e-28	2	87279109	2920	0.02653	TRUE	2	1	TRUE
CD8 on CD28+ CD45RA+ CD8br	rs116619343	C	G	C	G	-0.6381	0.000584586	0.0089	0.023858	FALSE	TRUE	FALSE	ieu-b-4874	5	9335253	0.000453227	373295	0.2	bladder cancer	TRUE	NA	NA	NA	NA	NA	NA	NA	6.95e-06	5	9335253	2920	0.1417	TRUE	2	1	TRUE
CD8 on CD28+ CD45RA+ CD8br	rs1264570	T	C	T	C	0.1984	5.43e-05	0.7204	0.606791	FALSE	FALSE	FALSE	ieu-b-4874	6	30365210	0.000139482	373295	0.7	bladder cancer	TRUE	NA	NA	NA	NA	NA	NA	NA	1.42e-09	6	30365210	2920	0.03266	TRUE	2	1	TRUE
CD8 on CD28+ CD45RA+ CD8br	rs12660712	A	C	A	C	-0.2799	0.000313847	0.1152	0.029751	FALSE	FALSE	FALSE	ieu-b-4874	6	29734634	0.000397495	373295	0.43	bladder cancer	TRUE	NA	NA	NA	NA	NA	NA	NA	1.15e-08	6	29734634	2920	0.04891	TRUE	2	1	TRUE
CD8 on CD28+ CD45RA+ CD8br	rs130065	A	G	A	G	-0.3127	-0.000104411	0.1642	0.240965	FALSE	FALSE	FALSE	ieu-b-4874	6	31122500	0.000157957	373295	0.51	bladder cancer	TRUE	NA	NA	NA	NA	NA	NA	NA	1.42e-14	6	31122500	2920	0.04043	TRUE	2	1	TRUE
CD8 on CD28+ CD45RA+ CD8br	rs13024436	A	G	A	G	0.1591	-2.6e-05	0.3759	0.393484	FALSE	FALSE	FALSE	ieu-b-4874	2	86549088	0.000139174	373295	0.85	bladder cancer	TRUE	TRUE	rs13024436	rs35723061	A	G	A	G	1.08e-08	2	86534521	2920	0.02774	TRUE	2	1	TRUE
CD8 on CD28+ CD45RA+ CD8br	rs1356625	C	T	C	T	0.192	-8.37e-05	0.463	0.484204	FALSE	FALSE	FALSE	ieu-b-4874	2	86022747	0.000139265	373295	0.55	bladder cancer	TRUE	NA	NA	NA	NA	NA	NA	NA	1.37e-12	2	86022747	2920	0.02696	TRUE	2	1	TRUE
CD8 on CD28+ CD45RA+ CD8br	rs141200631	G	T	G	T	0.9591	0.0001838	0.0041	0.012352	FALSE	FALSE	FALSE	ieu-b-4874	13	94482351	0.000635749	373295	0.77	bladder cancer	TRUE	NA	NA	NA	NA	NA	NA	NA	4.56e-06	13	94482351	2920	0.2088	TRUE	2	1	TRUE
CD8 on CD28+ CD45RA+ CD8br	rs184303531	A	G	A	G	0.7048	-0.0015024	0.0068	0.013274	FALSE	FALSE	FALSE	ieu-b-4874	1	237230229	0.000656473	373295	0.0219999	bladder cancer	TRUE	NA	NA	NA	NA	NA	NA	NA	9.28e-06	1	237230229	2920	0.1587	TRUE	2	1	TRUE
CD8 on CD28+ CD45RA+ CD8br	rs191051785	G	A	G	A	-1.157	-0.000301628	0.0029	0.019089	FALSE	FALSE	FALSE	ieu-b-4874	10	32003966	0.00050541	373295	0.55	bladder cancer	TRUE	NA	NA	NA	NA	NA	NA	NA	3.57e-06	10	32003966	2920	0.2492	TRUE	2	1	TRUE
CD8 on CD28+ CD45RA+ CD8br	rs201585667	C	A	C	A	-0.1903	-8.12e-05	0.1425	0.134878	FALSE	FALSE	FALSE	ieu-b-4874	11	24885640	0.000198309	373295	0.68	bladder cancer	TRUE	TRUE	rs201585667	rs10834511	C	A	G	A	5.89e-06	11	24881116	2920	0.04192	TRUE	2	1	TRUE
CD8 on CD28+ CD45RA+ CD8br	rs28747043	G	A	G	A	-0.1487	-0.000108067	0.4195	0.238377	FALSE	FALSE	FALSE	ieu-b-4874	6	32655508	0.000159089	373295	0.5	bladder cancer	TRUE	NA	NA	NA	NA	NA	NA	NA	5.43e-06	6	32655508	2920	0.03265	TRUE	2	1	TRUE
CD8 on CD28+ CD45RA+ CD8br	rs404977	G	A	G	A	0.1277	-8.09e-05	0.3692	0.305724	FALSE	FALSE	FALSE	ieu-b-4874	11	35132267	0.000147128	373295	0.58	bladder cancer	TRUE	NA	NA	NA	NA	NA	NA	NA	4.84e-06	11	35132267	2920	0.02788	TRUE	2	1	TRUE
CD8 on CD28+ CD45RA+ CD8br	rs4691190	C	G	C	G	0.1404	8.08e-05	0.3	0.284042	FALSE	TRUE	FALSE	ieu-b-4874	4	166319020	0.000150476	373295	0.59	bladder cancer	TRUE	NA	NA	NA	NA	NA	NA	NA	1.66e-06	4	166319020	2920	0.02925	TRUE	2	1	TRUE
CD8 on CD28+ CD45RA+ CD8br	rs517004	T	G	T	G	0.5458	-0.000352589	0.988	0.942574	FALSE	FALSE	FALSE	ieu-b-4874	1	18664626	0.000290427	373295	0.22	bladder cancer	TRUE	NA	NA	NA	NA	NA	NA	NA	7.4e-06	1	18664626	2920	0.1216	TRUE	2	1	TRUE
CD8 on CD28+ CD45RA+ CD8br	rs56250120	T	C	T	C	0.1266	0.00012404	0.4235	0.270537	FALSE	FALSE	FALSE	ieu-b-4874	9	120600010	0.00015224	373295	0.42	bladder cancer	TRUE	TRUE	rs56250120	rs12552244	T	C	T	C	3.56e-06	9	120599704	2920	0.02726	TRUE	2	1	TRUE
CD8 on CD28+ CD45RA+ CD8br	rs58853189	A	G	A	G	0.1515	-0.000118209	0.1914	0.108834	FALSE	FALSE	FALSE	ieu-b-4874	6	41537344	0.000217061	373295	0.59	bladder cancer	TRUE	TRUE	rs58853189	rs7761231	A	G	A	G	9.72e-06	6	41532904	2920	0.03419	TRUE	2	1	TRUE
CD8 on CD28+ CD45RA+ CD8br	rs6903896	A	G	A	G	-0.3411	-0.000148454	0.1269	0.025726	FALSE	FALSE	FALSE	ieu-b-4874	6	31168029	0.000426786	373295	0.73	bladder cancer	TRUE	NA	NA	NA	NA	NA	NA	NA	1.49e-13	6	31168029	2920	0.04595	TRUE	2	1	TRUE
CD8 on CD28+ CD45RA+ CD8br	rs76872865	G	A	G	A	0.1866	0.000120487	0.1214	0.131883	FALSE	FALSE	FALSE	ieu-b-4874	12	10727673	0.000202602	373295	0.55	bladder cancer	TRUE	NA	NA	NA	NA	NA	NA	NA	5.02e-06	12	10727673	2920	0.04082	TRUE	2	1	TRUE
CD8 on CD28+ CD45RA+ CD8br	rs7935549	T	C	T	C	-0.1271	-4.08e-05	0.3495	0.370094	FALSE	FALSE	FALSE	ieu-b-4874	11	134312341	0.000140062	373295	0.77	bladder cancer	TRUE	NA	NA	NA	NA	NA	NA	NA	5.56e-06	11	134312341	2920	0.02792	TRUE	2	1	TRUE
CD8 on CD28+ CD45RA+ CD8br	rs80190728	G	A	G	A	-0.4219	-0.00030615	0.0211	0.022778	FALSE	FALSE	FALSE	ieu-b-4874	17	47474902	0.000461887	373295	0.51	bladder cancer	TRUE	NA	NA	NA	NA	NA	NA	NA	6.43e-06	17	47474902	2920	0.09333	TRUE	2	1	TRUE
CD8 on CD28+ CD45RA+ CD8br	rs938487	G	A	G	A	-0.5168	0.000309155	0.2476	0.443658	FALSE	FALSE	FALSE	ieu-b-4874	2	87009488	0.0001368	373295	0.0239999	bladder cancer	TRUE	NA	NA	NA	NA	NA	NA	NA	2.91e-65	2	87009488	2920	0.02954	TRUE	2	1	TRUE
IgD+ CD38br %lymphocyte	rs10103048	C	A	C	A	0.126	-3.24e-05	0.7321	0.59439	FALSE	FALSE	FALSE	ieu-b-4874	8	130602281	0.000138591	373295	0.82	bladder cancer	TRUE	NA	NA	NA	NA	NA	NA	NA	2.99e-06	8	130602281	3656	0.02692	TRUE	2	1	TRUE
IgD+ CD38br %lymphocyte	rs10821937	T	C	T	C	-0.116	0.000137394	0.6458	0.660086	FALSE	FALSE	FALSE	ieu-b-4874	10	63723909	0.000142842	373295	0.34	bladder cancer	TRUE	NA	NA	NA	NA	NA	NA	NA	5.66e-06	10	63723909	3656	0.02553	TRUE	2	1	TRUE
IgD+ CD38br %lymphocyte	rs10832409	A	G	A	G	0.1495	5.26e-05	0.1722	0.203671	FALSE	FALSE	FALSE	ieu-b-4874	11	15377699	0.000167931	373295	0.75	bladder cancer	TRUE	NA	NA	NA	NA	NA	NA	NA	3.74e-06	11	15377699	3656	0.03227	TRUE	2	1	TRUE
IgD+ CD38br %lymphocyte	rs11068290	T	C	T	C	0.3875	0.00021403	0.0231	0.012873	FALSE	FALSE	FALSE	ieu-b-4874	12	110228055	0.000598788	373295	0.719999	bladder cancer	TRUE	NA	NA	NA	NA	NA	NA	NA	1.09e-06	12	110228055	3656	0.07937	TRUE	2	1	TRUE
IgD+ CD38br %lymphocyte	rs11185560	A	G	A	G	-0.2347	8.55e-05	0.9375	0.96229	FALSE	FALSE	FALSE	ieu-b-4874	7	194756	0.000363921	373295	0.81	bladder cancer	TRUE	TRUE	rs11185560	rs117689540	G	A	A	C	2.96e-06	7	190115	3656	0.05014	TRUE	2	1	TRUE
IgD+ CD38br %lymphocyte	rs11682311	C	T	C	T	-0.1278	1.31e-05	0.3243	0.414925	FALSE	FALSE	FALSE	ieu-b-4874	2	16464977	0.000137866	373295	0.92	bladder cancer	TRUE	NA	NA	NA	NA	NA	NA	NA	9.11e-07	2	16464977	3656	0.02599	TRUE	2	1	TRUE
IgD+ CD38br %lymphocyte	rs117772462	A	T	A	T	-0.4644	7.29e-05	0.0159	0.012836	FALSE	TRUE	FALSE	ieu-b-4874	7	48791017	0.000612042	373295	0.91	bladder cancer	TRUE	NA	NA	NA	NA	NA	NA	NA	1.59e-06	7	48791017	3656	0.09659	TRUE	2	1	TRUE
IgD+ CD38br %lymphocyte	rs13300113	T	A	T	A	0.1232	0.000214773	0.2789	0.282696	FALSE	TRUE	FALSE	ieu-b-4874	9	115679594	0.000150442	373295	0.15	bladder cancer	TRUE	TRUE	rs13300113	rs7021726	T	A	T	C	7.75e-06	9	115678594	3656	0.02752	TRUE	2	1	TRUE
IgD+ CD38br %lymphocyte	rs140380950	C	T	C	T	-0.3597	-0.000390242	0.0368	0.014305	FALSE	FALSE	FALSE	ieu-b-4874	2	105587803	0.000581055	373295	0.5	bladder cancer	TRUE	NA	NA	NA	NA	NA	NA	NA	2.07e-08	2	105587803	3656	0.06402	TRUE	2	1	TRUE
IgD+ CD38br %lymphocyte	rs1695681	A	C	A	C	-0.1213	-8.36e-05	0.5309	0.515569	FALSE	FALSE	FALSE	ieu-b-4874	8	118255950	0.00013608	373295	0.54	bladder cancer	TRUE	NA	NA	NA	NA	NA	NA	NA	7.76e-07	8	118255950	3656	0.02451	TRUE	2	1	TRUE
IgD+ CD38br %lymphocyte	rs17408660	G	A	G	A	-0.4731	-0.000202752	0.0129	0.040713	FALSE	FALSE	FALSE	ieu-b-4874	12	27184482	0.000343789	373295	0.56	bladder cancer	TRUE	NA	NA	NA	NA	NA	NA	NA	7.93e-06	12	27184482	3656	0.1058	TRUE	2	1	TRUE
IgD+ CD38br %lymphocyte	rs1919856	G	A	G	A	0.1734	7.46e-05	0.108	0.088978	FALSE	FALSE	FALSE	ieu-b-4874	1	247700906	0.000238821	373295	0.75	bladder cancer	TRUE	NA	NA	NA	NA	NA	NA	NA	5.73e-06	1	247700906	3656	0.03817	TRUE	2	1	TRUE
IgD+ CD38br %lymphocyte	rs2216762	C	T	C	T	-0.1525	0.000382741	0.8141	0.864892	FALSE	FALSE	FALSE	ieu-b-4874	16	84759446	0.000198271	373295	0.0539995	bladder cancer	TRUE	NA	NA	NA	NA	NA	NA	NA	8.88e-07	16	84759446	3656	0.03097	TRUE	2	1	TRUE
IgD+ CD38br %lymphocyte	rs2686423	G	A	G	A	0.3352	0.000254695	0.9739	0.930937	FALSE	FALSE	FALSE	ieu-b-4874	3	183195708	0.000266723	373295	0.34	bladder cancer	TRUE	NA	NA	NA	NA	NA	NA	NA	6.67e-06	3	183195708	3656	0.07432	TRUE	2	1	TRUE
IgD+ CD38br %lymphocyte	rs2857599	A	G	A	G	-0.1653	-3.81e-05	0.1722	0.158052	FALSE	FALSE	FALSE	ieu-b-4874	6	31562150	0.000185716	373295	0.84	bladder cancer	TRUE	NA	NA	NA	NA	NA	NA	NA	6.07e-06	6	31562150	3656	0.03649	TRUE	2	1	TRUE
IgD+ CD38br %lymphocyte	rs3811315	A	T	A	T	0.1771	-0.000319734	0.1157	0.08886	FALSE	TRUE	FALSE	ieu-b-4874	14	22499870	0.000242236	373295	0.19	bladder cancer	TRUE	NA	NA	NA	NA	NA	NA	NA	2.5e-06	14	22499870	3656	0.03756	TRUE	2	1	TRUE
IgD+ CD38br %lymphocyte	rs4907205	C	T	C	T	-0.1658	-0.000124902	0.1232	0.186735	FALSE	FALSE	FALSE	ieu-b-4874	2	97558150	0.000173443	373295	0.47	bladder cancer	TRUE	NA	NA	NA	NA	NA	NA	NA	9.6e-06	2	97558150	3656	0.03741	TRUE	2	1	TRUE
IgD+ CD38br %lymphocyte	rs55708924	G	A	G	A	-0.3886	-0.000463326	0.0185	0.012627	FALSE	FALSE	FALSE	ieu-b-4874	21	16767346	0.000604615	373295	0.44	bladder cancer	TRUE	NA	NA	NA	NA	NA	NA	NA	8.59e-06	21	16767346	3656	0.0872	TRUE	2	1	TRUE
IgD+ CD38br %lymphocyte	rs59879144	A	C	A	C	-0.4624	0.000531049	0.0161	0.039202	FALSE	FALSE	FALSE	ieu-b-4874	12	75564449	0.000348218	373295	0.13	bladder cancer	TRUE	NA	NA	NA	NA	NA	NA	NA	1.89e-06	12	75564449	3656	0.09688	TRUE	2	1	TRUE
IgD+ CD38br %lymphocyte	rs60521331	A	G	A	G	0.1158	-0.00011782	0.5022	0.443046	FALSE	FALSE	FALSE	ieu-b-4874	17	8639905	0.000136191	373295	0.39	bladder cancer	TRUE	NA	NA	NA	NA	NA	NA	NA	1.86e-06	17	8639905	3656	0.02425	TRUE	2	1	TRUE
IgD+ CD38br %lymphocyte	rs75589249	T	C	T	C	-0.5382	0.000500407	0.0107	0.034846	FALSE	FALSE	FALSE	ieu-b-4874	14	43915569	0.000369189	373295	0.18	bladder cancer	TRUE	NA	NA	NA	NA	NA	NA	NA	7.07e-06	14	43915569	3656	0.1197	TRUE	2	1	TRUE
IgD+ CD38br %lymphocyte	rs76112278	A	G	A	G	-0.4243	-0.000439755	0.0194	0.015532	FALSE	FALSE	FALSE	ieu-b-4874	4	15915069	0.000576551	373295	0.450001	bladder cancer	TRUE	NA	NA	NA	NA	NA	NA	NA	1.26e-06	4	15915069	3656	0.08741	TRUE	2	1	TRUE
IgD+ CD38br %lymphocyte	rs76660971	A	G	A	G	-0.1368	0.000261013	0.2299	0.151966	FALSE	FALSE	FALSE	ieu-b-4874	5	18919526	0.000193308	373295	0.18	bladder cancer	TRUE	NA	NA	NA	NA	NA	NA	NA	2.03e-06	5	18919526	3656	0.02874	TRUE	2	1	TRUE
IgD+ CD38br %lymphocyte	rs7667070	C	T	C	T	-0.283	-0.000427335	0.0361	0.037913	FALSE	FALSE	FALSE	ieu-b-4874	4	38379833	0.000355571	373295	0.23	bladder cancer	TRUE	NA	NA	NA	NA	NA	NA	NA	8.56e-06	4	38379833	3656	0.06349	TRUE	2	1	TRUE
IgD+ CD38br %lymphocyte	rs78658073	A	G	A	G	1.792	-0.000200248	0.001	0.035787	FALSE	FALSE	FALSE	ieu-b-4874	5	498773	0.000368984	373295	0.59	bladder cancer	TRUE	NA	NA	NA	NA	NA	NA	NA	1.01e-06	5	498773	3656	0.3659	TRUE	2	1	TRUE
IgD+ CD38br %lymphocyte	rs80330977	A	G	A	G	-0.2327	-0.000322239	0.0814	0.076462	FALSE	FALSE	FALSE	ieu-b-4874	5	158276610	0.000254504	373295	0.21	bladder cancer	TRUE	NA	NA	NA	NA	NA	NA	NA	2.47e-07	5	158276610	3656	0.04501	TRUE	2	1	TRUE
PDL-1 on monocyte	rs10103683	C	G	C	G	-0.1161	-7.21e-05	0.3588	0.31495	FALSE	TRUE	FALSE	ieu-b-4874	8	106272376	0.000145737	373295	0.62	bladder cancer	TRUE	NA	NA	NA	NA	NA	NA	NA	5.19e-06	8	106272376	3629	0.02543	TRUE	2	1	TRUE
PDL-1 on monocyte	rs10276990	A	C	A	C	0.198	9.27e-05	0.0971	0.070339	FALSE	FALSE	FALSE	ieu-b-4874	7	16903052	0.000264761	373295	0.73	bladder cancer	TRUE	NA	NA	NA	NA	NA	NA	NA	1.59e-06	7	16903052	3629	0.04119	TRUE	2	1	TRUE
PDL-1 on monocyte	rs11038817	T	C	T	C	0.2878	0.00014005	0.0397	0.079556	FALSE	FALSE	FALSE	ieu-b-4874	11	46226004	0.000250418	373295	0.58	bladder cancer	TRUE	NA	NA	NA	NA	NA	NA	NA	4.66e-06	11	46226004	3629	0.06275	TRUE	2	1	TRUE
PDL-1 on monocyte	rs147810622	G	C	G	C	-0.5881	-0.000410222	0.0163	0.062634	FALSE	TRUE	FALSE	ieu-b-4874	7	151910695	0.000288904	373295	0.16	bladder cancer	TRUE	NA	NA	NA	NA	NA	NA	NA	4.15e-09	7	151910695	3629	0.0998	TRUE	2	1	TRUE
PDL-1 on monocyte	rs17851876	T	G	T	G	0.2938	-0.000389794	0.0384	0.063803	FALSE	FALSE	FALSE	ieu-b-4874	16	67979423	0.000285032	373295	0.17	bladder cancer	TRUE	NA	NA	NA	NA	NA	NA	NA	7.41e-06	16	67979423	3629	0.06547	TRUE	2	1	TRUE
PDL-1 on monocyte	rs2569177	T	G	T	G	0.1298	-0.000212338	0.3057	0.288297	FALSE	FALSE	FALSE	ieu-b-4874	5	139992162	0.000149587	373295	0.16	bladder cancer	TRUE	NA	NA	NA	NA	NA	NA	NA	1.45e-06	5	139992162	3629	0.02689	TRUE	2	1	TRUE
PDL-1 on monocyte	rs4809811	T	C	T	C	-0.1168	-0.000113965	0.6065	0.546151	FALSE	FALSE	FALSE	ieu-b-4874	20	49351740	0.000135721	373295	0.4	bladder cancer	TRUE	NA	NA	NA	NA	NA	NA	NA	3.9e-06	20	49351740	3629	0.02527	TRUE	2	1	TRUE
PDL-1 on monocyte	rs4908637	A	G	A	G	0.3251	-7.37e-05	0.0316	0.053635	FALSE	FALSE	FALSE	ieu-b-4874	1	7482757	0.000299836	373295	0.81	bladder cancer	TRUE	NA	NA	NA	NA	NA	NA	NA	6.89e-06	1	7482757	3629	0.07219	TRUE	2	1	TRUE
PDL-1 on monocyte	rs74538501	T	C	T	C	-1.394	0.000382661	0.0019	0.011509	FALSE	FALSE	FALSE	ieu-b-4874	5	23431702	0.000641333	373295	0.55	bladder cancer	TRUE	TRUE	rs74538501	rs114522050	T	C	A	T	1.4e-06	5	23367000	3629	0.2885	TRUE	2	1	TRUE
PDL-1 on monocyte	rs75567064	A	G	A	G	0.1914	0.000120878	0.1222	0.041888	FALSE	FALSE	FALSE	ieu-b-4874	20	48898441	0.000339893	373295	0.719999	bladder cancer	TRUE	NA	NA	NA	NA	NA	NA	NA	5.84e-07	20	48898441	3629	0.03824	TRUE	2	1	TRUE
PDL-1 on monocyte	rs8089422	A	G	A	G	-0.2397	-0.000470171	0.0565	0.044369	FALSE	FALSE	FALSE	ieu-b-4874	18	54525353	0.000328457	373295	0.15	bladder cancer	TRUE	NA	NA	NA	NA	NA	NA	NA	5.2e-06	18	54525353	3629	0.05252	TRUE	2	1	TRUE
PDL-1 on monocyte	rs9427401	G	C	G	C	-0.2725	-4.65e-05	0.2313	0.116793	FALSE	TRUE	FALSE	ieu-b-4874	1	161492175	0.000211259	373295	0.83	bladder cancer	TRUE	NA	NA	NA	NA	NA	NA	NA	1.53e-20	1	161492175	3629	0.02916	TRUE	2	1	TRUE
CD45 on HLA DR+ CD8br	rs10105402	T	C	T	C	0.1601	-6.28e-05	0.2067	0.247123	FALSE	FALSE	FALSE	ieu-b-4874	8	131518417	0.00015788	373295	0.69	bladder cancer	TRUE	NA	NA	NA	NA	NA	NA	NA	8.45e-07	8	131518417	3060	0.03244	TRUE	2	1	TRUE
CD45 on HLA DR+ CD8br	rs10151675	A	T	A	T	-0.1464	-2.83e-05	0.2044	0.259669	FALSE	TRUE	FALSE	ieu-b-4874	14	77594914	0.000154885	373295	0.86	bladder cancer	TRUE	NA	NA	NA	NA	NA	NA	NA	8.07e-06	14	77594914	3060	0.03275	TRUE	2	1	TRUE
CD45 on HLA DR+ CD8br	rs111625920	T	C	T	C	-0.1213	0.000215732	0.3802	0.290248	FALSE	FALSE	FALSE	ieu-b-4874	3	195814264	0.00014902	373295	0.15	bladder cancer	TRUE	NA	NA	NA	NA	NA	NA	NA	9.55e-06	3	195814264	3060	0.02736	TRUE	2	1	TRUE
CD45 on HLA DR+ CD8br	rs12127496	C	A	C	A	0.185	4.75e-05	0.1136	0.136684	FALSE	FALSE	FALSE	ieu-b-4874	1	198723915	0.000197662	373295	0.81	bladder cancer	TRUE	NA	NA	NA	NA	NA	NA	NA	8.82e-06	1	198723915	3060	0.04157	TRUE	2	1	TRUE
CD45 on HLA DR+ CD8br	rs12335987	C	A	C	A	-0.2974	-0.000360771	0.0462	0.129647	FALSE	FALSE	FALSE	ieu-b-4874	9	13235045	0.000202318	373295	0.0749998	bladder cancer	TRUE	NA	NA	NA	NA	NA	NA	NA	1.66e-06	9	13235045	3060	0.06197	TRUE	2	1	TRUE
CD45 on HLA DR+ CD8br	rs12820360	A	T	A	T	-1.122	-0.000932388	0.0038	0.012486	FALSE	TRUE	FALSE	ieu-b-4874	12	82099799	0.00061594	373295	0.13	bladder cancer	TRUE	NA	NA	NA	NA	NA	NA	NA	1.5e-07	12	82099799	3060	0.213	TRUE	2	1	TRUE
CD45 on HLA DR+ CD8br	rs137878176	T	A	T	A	2.7	0.000214638	0.0005	0.0109	FALSE	TRUE	FALSE	ieu-b-4874	2	51742547	0.000700603	373295	0.760001	bladder cancer	TRUE	NA	NA	NA	NA	NA	NA	NA	6.1e-07	2	51742547	3060	0.5402	TRUE	2	1	TRUE
CD45 on HLA DR+ CD8br	rs141959698	A	G	A	G	-1.818	0.000269831	0.0011	0.018715	FALSE	FALSE	FALSE	ieu-b-4874	15	81676142	0.000508743	373295	0.6	bladder cancer	TRUE	NA	NA	NA	NA	NA	NA	NA	1.77e-06	15	81676142	3060	0.3797	TRUE	2	1	TRUE
CD45 on HLA DR+ CD8br	rs16925130	C	T	C	T	-0.4926	-0.000222251	0.0185	0.051095	FALSE	FALSE	FALSE	ieu-b-4874	9	100660122	0.00030885	373295	0.47	bladder cancer	TRUE	NA	NA	NA	NA	NA	NA	NA	4.09e-07	9	100660122	3060	0.09706	TRUE	2	1	TRUE
CD45 on HLA DR+ CD8br	rs17132647	A	G	A	G	-0.1781	-0.000223987	0.167	0.100052	FALSE	FALSE	FALSE	ieu-b-4874	4	2491695	0.000225103	373295	0.32	bladder cancer	TRUE	NA	NA	NA	NA	NA	NA	NA	6.88e-07	4	2491695	3060	0.0358	TRUE	2	1	TRUE
CD45 on HLA DR+ CD8br	rs2582093	T	C	T	C	-0.1208	-1.08e-05	0.3712	0.339228	FALSE	FALSE	FALSE	ieu-b-4874	3	183533376	0.000144401	373295	0.94	bladder cancer	TRUE	NA	NA	NA	NA	NA	NA	NA	8.11e-06	3	183533376	3060	0.02703	TRUE	2	1	TRUE
CD45 on HLA DR+ CD8br	rs3116989	T	G	T	G	-0.1494	-5.94e-05	0.2685	0.130208	FALSE	FALSE	FALSE	ieu-b-4874	6	33099538	0.000200983	373295	0.77	bladder cancer	TRUE	NA	NA	NA	NA	NA	NA	NA	2.1e-06	6	33099538	3060	0.03143	TRUE	2	1	TRUE
CD45 on HLA DR+ CD8br	rs72773782	G	A	G	A	0.4448	-9.36e-05	0.0208	0.018266	FALSE	FALSE	FALSE	ieu-b-4874	5	75531539	0.000503393	373295	0.85	bladder cancer	TRUE	NA	NA	NA	NA	NA	NA	NA	1.22e-06	5	75531539	3060	0.09149	TRUE	2	1	TRUE
CD45 on HLA DR+ CD8br	rs75453573	C	T	C	T	-0.2469	-0.000182145	0.06	0.065675	FALSE	FALSE	FALSE	ieu-b-4874	2	192777430	0.00027578	373295	0.51	bladder cancer	TRUE	NA	NA	NA	NA	NA	NA	NA	6.92e-06	2	192777430	3060	0.05481	TRUE	2	1	TRUE
CD45 on HLA DR+ CD8br	rs7559619	G	A	G	A	0.145	-9.8e-05	0.3446	0.379643	FALSE	FALSE	FALSE	ieu-b-4874	2	38892207	0.000141658	373295	0.49	bladder cancer	TRUE	NA	NA	NA	NA	NA	NA	NA	2.55e-07	2	38892207	3060	0.02806	TRUE	2	1	TRUE
CD45 on HLA DR+ CD8br	rs75760442	A	T	A	T	-0.9807	0.00118114	0.0036	0.016332	FALSE	TRUE	FALSE	ieu-b-4874	3	122783073	0.000556916	373295	0.0340001	bladder cancer	TRUE	NA	NA	NA	NA	NA	NA	NA	6.51e-06	3	122783073	3060	0.2171	TRUE	2	1	TRUE
CD45 on HLA DR+ CD8br	rs8071409	G	A	G	A	-0.1344	-4.81e-05	0.3129	0.396445	FALSE	FALSE	FALSE	ieu-b-4874	17	36030219	0.000140917	373295	0.73	bladder cancer	TRUE	NA	NA	NA	NA	NA	NA	NA	2.52e-06	17	36030219	3060	0.02851	TRUE	2	1	TRUE
CD28- CD8dim AC	rs10107063	C	T	C	T	-0.6397	-0.0010866	0.0091	0.010876	FALSE	FALSE	FALSE	ieu-b-4874	8	123562235	0.000651129	373295	0.0949992	bladder cancer	TRUE	NA	NA	NA	NA	NA	NA	NA	2.94e-06	8	123562235	3408	0.1366	TRUE	2	1	TRUE
CD28- CD8dim AC	rs10772894	G	A	G	A	-0.2226	0.000117977	0.0753	0.058613	FALSE	FALSE	FALSE	ieu-b-4874	12	16263287	0.000288395	373295	0.68	bladder cancer	TRUE	NA	NA	NA	NA	NA	NA	NA	3.53e-06	12	16263287	3408	0.04792	TRUE	2	1	TRUE
CD28- CD8dim AC	rs111273508	A	G	A	G	0.5414	0.000520962	0.0117	0.026209	FALSE	FALSE	FALSE	ieu-b-4874	6	25330739	0.000434321	373295	0.23	bladder cancer	TRUE	NA	NA	NA	NA	NA	NA	NA	4.62e-06	6	25330739	3408	0.118	TRUE	2	1	TRUE
CD28- CD8dim AC	rs111748563	G	A	G	A	0.2783	-2.93e-05	0.0503	0.040767	FALSE	FALSE	FALSE	ieu-b-4874	19	17901533	0.000359901	373295	0.94	bladder cancer	TRUE	NA	NA	NA	NA	NA	NA	NA	1.99e-06	19	17901533	3408	0.05843	TRUE	2	1	TRUE
CD28- CD8dim AC	rs115125396	C	T	C	T	0.2114	-5.94e-06	0.0855	0.059341	FALSE	FALSE	FALSE	ieu-b-4874	2	147306619	0.000290809	373295	0.98	bladder cancer	TRUE	NA	NA	NA	NA	NA	NA	NA	5e-06	2	147306619	3408	0.04624	TRUE	2	1	TRUE
CD28- CD8dim AC	rs115695595	T	A	T	A	-0.243	-0.00030175	0.0625	0.050745	FALSE	TRUE	FALSE	ieu-b-4874	6	45300097	0.000308443	373295	0.33	bladder cancer	TRUE	NA	NA	NA	NA	NA	NA	NA	5.36e-06	6	45300097	3408	0.05333	TRUE	2	1	TRUE
CD28- CD8dim AC	rs12185529	A	G	A	G	0.3958	-2.02e-05	0.0235	0.07769	FALSE	FALSE	FALSE	ieu-b-4874	19	3059754	0.0002599	373295	0.94	bladder cancer	TRUE	NA	NA	NA	NA	NA	NA	NA	2.43e-06	19	3059754	3408	0.08382	TRUE	2	1	TRUE
CD28- CD8dim AC	rs12204116	C	T	C	T	-0.1732	-1.1e-06	0.1389	0.231669	FALSE	FALSE	FALSE	ieu-b-4874	6	91469768	0.000160322	373295	0.99	bladder cancer	TRUE	NA	NA	NA	NA	NA	NA	NA	3.82e-06	6	91469768	3408	0.03742	TRUE	2	1	TRUE
CD28- CD8dim AC	rs12986962	G	A	G	A	-0.1568	-9.81e-05	0.2826	0.373817	FALSE	FALSE	FALSE	ieu-b-4874	2	111808558	0.000140243	373295	0.48	bladder cancer	TRUE	NA	NA	NA	NA	NA	NA	NA	3.59e-08	2	111808558	3408	0.0284	TRUE	2	1	TRUE
CD28- CD8dim AC	rs142837365	G	A	G	A	-0.8597	-0.000754371	0.0044	0.019103	FALSE	FALSE	FALSE	ieu-b-4874	22	41271935	0.000507084	373295	0.14	bladder cancer	TRUE	NA	NA	NA	NA	NA	NA	NA	6.14e-06	22	41271935	3408	0.1898	TRUE	2	1	TRUE
CD28- CD8dim AC	rs35947132	A	G	A	G	0.2001	-0.000419006	0.0942	0.040215	FALSE	FALSE	FALSE	ieu-b-4874	10	72360387	0.000345355	373295	0.23	bladder cancer	TRUE	NA	NA	NA	NA	NA	NA	NA	5.06e-06	10	72360387	3408	0.04379	TRUE	2	1	TRUE
CD28- CD8dim AC	rs483239	T	C	T	C	-0.128	8.41e-05	0.2931	0.174289	FALSE	FALSE	FALSE	ieu-b-4874	10	96989103	0.000178225	373295	0.64	bladder cancer	TRUE	NA	NA	NA	NA	NA	NA	NA	8.57e-06	10	96989103	3408	0.02872	TRUE	2	1	TRUE
CD28- CD8dim AC	rs535307	G	A	G	A	-0.1242	7.95e-05	0.636	0.683734	FALSE	FALSE	FALSE	ieu-b-4874	7	105345398	0.000147162	373295	0.59	bladder cancer	TRUE	NA	NA	NA	NA	NA	NA	NA	2.73e-06	7	105345398	3408	0.02643	TRUE	2	1	TRUE
CD28- CD8dim AC	rs58745116	A	G	A	G	0.1662	-6.14e-05	0.5219	0.392499	FALSE	FALSE	FALSE	ieu-b-4874	17	33803592	0.000138614	373295	0.66	bladder cancer	TRUE	NA	NA	NA	NA	NA	NA	NA	1.05e-10	17	33803592	3408	0.02565	TRUE	2	1	TRUE
CD28- CD8dim AC	rs626030	G	T	G	T	0.3043	3.59e-05	0.9607	0.881788	FALSE	FALSE	FALSE	ieu-b-4874	7	51947089	0.000214952	373295	0.87	bladder cancer	TRUE	NA	NA	NA	NA	NA	NA	NA	4.82e-06	7	51947089	3408	0.06645	TRUE	2	1	TRUE
CD28- CD8dim AC	rs7152367	A	G	A	G	0.4723	0.000227195	0.0161	0.051124	FALSE	FALSE	FALSE	ieu-b-4874	14	66292007	0.000306618	373295	0.46	bladder cancer	TRUE	NA	NA	NA	NA	NA	NA	NA	2.35e-06	14	66292007	3408	0.09988	TRUE	2	1	TRUE
CD28- CD8dim AC	rs7448311	C	T	C	T	-0.1263	0.000109544	0.3703	0.327472	FALSE	FALSE	FALSE	ieu-b-4874	5	95643248	0.000144277	373295	0.450001	bladder cancer	TRUE	NA	NA	NA	NA	NA	NA	NA	2.22e-06	5	95643248	3408	0.02665	TRUE	2	1	TRUE
CD28- CD8dim AC	rs75436543	T	C	T	C	-1.111	0.00139423	0.0025	0.018464	FALSE	FALSE	FALSE	ieu-b-4874	1	239777743	0.000527132	373295	0.00819993	bladder cancer	TRUE	NA	NA	NA	NA	NA	NA	NA	7.46e-06	1	239777743	3408	0.2476	TRUE	2	1	TRUE
CD28- CD8dim AC	rs76396396	A	T	A	T	0.5035	-0.000139118	0.0135	0.024016	FALSE	TRUE	FALSE	ieu-b-4874	7	17214739	0.000451118	373295	0.760001	bladder cancer	TRUE	NA	NA	NA	NA	NA	NA	NA	6.41e-06	7	17214739	3408	0.1114	TRUE	2	1	TRUE
CD28- CD8dim AC	rs79122093	G	A	G	A	0.3929	0.000562332	0.029	0.024913	FALSE	FALSE	FALSE	ieu-b-4874	6	101593157	0.000437564	373295	0.2	bladder cancer	TRUE	NA	NA	NA	NA	NA	NA	NA	3.87e-07	6	101593157	3408	0.07727	TRUE	2	1	TRUE
[truncated: 14,584 more rows]
