# Supplementary material for: Causal relationship between immune cells and bladder cancer: a bi-directional Mendelian randomization study
Source: Research Square preprint supplement (doi:10.21203/rs.3.rs-4540897/v1), 2024-06-26
Supplement: Supplementary file 5 [file f32ba9a4103d6cb075a033f4.xlsx]

## Sheet: Table 1
Supplementary Table 3: Effect estimates of the associations of bladder cancer in the MR analyses
immune cell	method	nsnp	b	se	pval	lo_ci	up_ci	or	or_lci95	or_uci95
SSC-A on plasmacytoid DC	MR Egger	25	-0.00056	0.00023	0.025	-0.00102	-0.0001	0.99944	0.99898	0.9999
SSC-A on plasmacytoid DC	Weighted median	25	-0.00044	0.00022	0.047	-0.00088	-1e-05	0.99956	0.99912	0.99999
SSC-A on plasmacytoid DC	Inverse variance weighted	25	-0.00037	0.00015	0.014	-0.00067	-8e-05	0.99963	0.99933	0.99992
SSC-A on plasmacytoid DC	Simple mode	25	-0.00038	0.00037	0.308	-0.0011	0.00034	0.99962	0.9989	1.00034
SSC-A on plasmacytoid DC	Weighted mode	25	-0.00053	0.00022	0.026	-0.00097	-9e-05	0.99947	0.99903	0.99991
CD62L- HLA DR++ monocyte AC	MR Egger	18	-0.00041	0.00061	0.513	-0.00159	0.00078	0.99959	0.99841	1.00078
CD62L- HLA DR++ monocyte AC	Weighted median	18	-0.00068	0.00036	0.061	-0.00139	3e-05	0.99932	0.99861	1.00003
CD62L- HLA DR++ monocyte AC	Inverse variance weighted	18	-0.00066	0.00026	0.012	-0.00118	-0.00015	0.99934	0.99882	0.99985
CD62L- HLA DR++ monocyte AC	Simple mode	18	-0.00054	0.00059	0.379	-0.0017	0.00063	0.99946	0.99831	1.00063
CD62L- HLA DR++ monocyte AC	Weighted mode	18	-0.00034	0.0005	0.512	-0.00132	0.00065	0.99967	0.99869	1.00065
CD19 on IgD- CD24-	MR Egger	21	-0.00091	0.00041	0.037	-0.00171	-0.00011	0.99909	0.99829	0.99989
CD19 on IgD- CD24-	Weighted median	21	-0.00056	0.0003	0.065	-0.00115	4e-05	0.99944	0.99885	1.00004
CD19 on IgD- CD24-	Inverse variance weighted	21	-0.00052	0.00023	0.023	-0.00097	-7e-05	0.99948	0.99903	0.99993
CD19 on IgD- CD24-	Simple mode	21	-0.00079	0.0006	0.201	-0.00197	0.00038	0.99921	0.99804	1.00038
CD19 on IgD- CD24-	Weighted mode	21	-0.0009	0.00043	0.047	-0.00174	-7e-05	0.9991	0.99826	0.99993
CD62L- monocyte AC	MR Egger	17	-0.00064	0.00059	0.298	-0.0018	0.00052	0.99936	0.9982	1.00052
CD62L- monocyte AC	Weighted median	17	-0.0008	0.00034	0.019	-0.00147	-0.00013	0.9992	0.99853	0.99987
CD62L- monocyte AC	Inverse variance weighted	17	-0.00071	0.00023	0.002	-0.00116	-0.00025	0.99929	0.99884	0.99975
CD62L- monocyte AC	Simple mode	17	-0.00068	0.00056	0.246	-0.00177	0.00042	0.99933	0.99823	1.00042
CD62L- monocyte AC	Weighted mode	17	-0.00078	0.00047	0.117	-0.00171	0.00014	0.99922	0.99829	1.00014
HLA DR+ T cell%T cell	MR Egger	32	-0.0001	0.00015	0.49	-0.00039	0.00018	0.9999	0.99961	1.00018
HLA DR+ T cell%T cell	Weighted median	32	-0.00031	0.00017	0.07	-0.00064	2e-05	0.99969	0.99937	1.00002
HLA DR+ T cell%T cell	Inverse variance weighted	32	-0.00025	0.00011	0.03	-0.00047	-2e-05	0.99975	0.99953	0.99998
HLA DR+ T cell%T cell	Simple mode	32	-0.0007	0.00028	0.019	-0.00125	-0.00014	0.9993	0.99875	0.99986
HLA DR+ T cell%T cell	Weighted mode	32	-0.00034	0.00015	0.031	-0.00063	-5e-05	0.99966	0.99937	0.99995
CD28 on CD39+ resting Treg	MR Egger	19	-0.0003	0.00012	0.022	-0.00054	-7e-05	0.9997	0.99946	0.99993
CD28 on CD39+ resting Treg	Weighted median	19	-0.00026	0.00013	0.051	-0.00052	0	0.99974	0.99948	1
CD28 on CD39+ resting Treg	Inverse variance weighted	19	-0.00025	0.0001	0.015	-0.00045	-5e-05	0.99975	0.99955	0.99995
CD28 on CD39+ resting Treg	Simple mode	19	-0.00043	0.00023	0.078	-0.00087	2e-05	0.99957	0.99913	1.00002
CD28 on CD39+ resting Treg	Weighted mode	19	-0.00027	0.00011	0.02	-0.00048	-6e-05	0.99973	0.99952	0.99994
CD38 on IgD+ CD24-	MR Egger	15	0.00083	0.00039	0.052	7e-05	0.00159	1.00083	1.00007	1.00159
CD38 on IgD+ CD24-	Weighted median	15	0.00075	0.00032	0.02	0.00012	0.00139	1.00075	1.00012	1.00139
CD38 on IgD+ CD24-	Inverse variance weighted	15	0.0005	0.00023	0.028	5e-05	0.00094	1.0005	1.00005	1.00094
CD38 on IgD+ CD24-	Simple mode	15	0.00093	0.0006	0.143	-0.00024	0.0021	1.00093	0.99976	1.0021
CD38 on IgD+ CD24-	Weighted mode	15	0.00093	0.00055	0.111	-0.00014	0.002	1.00093	0.99986	1.002
CD8br %T cell	MR Egger	19	-0.00021	0.00035	0.551	-0.00089	0.00047	0.99979	0.99911	1.00047
CD8br %T cell	Weighted median	19	-0.00041	0.00028	0.139	-0.00096	0.00013	0.99959	0.99904	1.00013
CD8br %T cell	Inverse variance weighted	19	-0.00045	0.00021	0.032	-0.00086	-4e-05	0.99955	0.99914	0.99996
CD8br %T cell	Simple mode	19	-0.00054	0.00046	0.255	-0.00143	0.00036	0.99947	0.99857	1.00036
CD8br %T cell	Weighted mode	19	-0.00041	0.00029	0.177	-0.00099	0.00016	0.99959	0.99901	1.00016
CD28 on CD28+ CD4+	MR Egger	28	-0.00025	0.00019	0.196	-0.00061	0.00012	0.99975	0.99939	1.00012
CD28 on CD28+ CD4+	Weighted median	28	-0.00021	0.00019	0.267	-0.00057	0.00016	0.99979	0.99943	1.00016
CD28 on CD28+ CD4+	Inverse variance weighted	28	-0.0003	0.00013	0.022	-0.00055	-4e-05	0.9997	0.99945	0.99996
CD28 on CD28+ CD4+	Simple mode	28	-0.00043	0.0003	0.162	-0.00102	0.00016	0.99957	0.99898	1.00016
CD28 on CD28+ CD4+	Weighted mode	28	-0.00025	0.00018	0.173	-0.00061	0.0001	0.99975	0.99939	1.0001
CD19 on IgD- CD27-	MR Egger	25	-0.00012	0.00038	0.756	-0.00086	0.00062	0.99988	0.99914	1.00062
CD19 on IgD- CD27-	Weighted median	25	-0.00047	0.00032	0.146	-0.0011	0.00016	0.99953	0.9989	1.00016
CD19 on IgD- CD27-	Inverse variance weighted	25	-0.00051	0.00023	0.027	-0.00096	-6e-05	0.99949	0.99904	0.99994
CD19 on IgD- CD27-	Simple mode	25	-0.00088	0.00056	0.126	-0.00198	0.00021	0.99912	0.99803	1.00021
CD19 on IgD- CD27-	Weighted mode	25	-0.00063	0.00039	0.123	-0.0014	0.00014	0.99937	0.9986	1.00014
CM CD4+ AC	MR Egger	27	0.00013	0.00023	0.58	-0.00032	0.00058	1.00013	0.99968	1.00058
CM CD4+ AC	Weighted median	27	0.00037	0.00025	0.135	-0.00011	0.00085	1.00037	0.99989	1.00085
CM CD4+ AC	Inverse variance weighted	27	0.00044	0.00016	0.006	0.00013	0.00075	1.00044	1.00013	1.00075
CM CD4+ AC	Simple mode	27	0.0005	0.00041	0.226	-0.00029	0.0013	1.0005	0.99971	1.0013
CM CD4+ AC	Weighted mode	27	0.00033	0.00023	0.159	-0.00012	0.00077	1.00033	0.99988	1.00077
CD25 on CD39+ resting Treg	MR Egger	12	0.00057	0.0006	0.362	-0.0006	0.00175	1.00057	0.9994	1.00176
CD25 on CD39+ resting Treg	Weighted median	12	0.00057	0.00041	0.159	-0.00022	0.00137	1.00057	0.99978	1.00137
CD25 on CD39+ resting Treg	Inverse variance weighted	12	0.00068	0.00033	0.039	4e-05	0.00132	1.00068	1.00004	1.00132
CD25 on CD39+ resting Treg	Simple mode	12	0.00116	0.00072	0.133	-0.00024	0.00257	1.00116	0.99976	1.00257
CD25 on CD39+ resting Treg	Weighted mode	12	0.0006	0.00056	0.304	-0.00049	0.00169	1.0006	0.99951	1.00169
HLA DR+ CD4+ AC	MR Egger	23	-0.0001	0.00041	0.82	-0.0009	0.00071	0.9999	0.9991	1.00071
HLA DR+ CD4+ AC	Weighted median	23	-0.00031	0.00028	0.258	-0.00086	0.00023	0.99969	0.99914	1.00023
HLA DR+ CD4+ AC	Inverse variance weighted	23	-0.00049	0.00022	0.024	-0.00091	-6e-05	0.99951	0.99909	0.99994
HLA DR+ CD4+ AC	Simple mode	23	-0.00065	0.00043	0.149	-0.00149	0.0002	0.99935	0.99851	1.0002
HLA DR+ CD4+ AC	Weighted mode	23	-0.00037	0.0003	0.23	-0.00096	0.00022	0.99963	0.99904	1.00022
CD11b on CD33br HLA DR+ CD14dim	MR Egger	21	-0.00042	0.00029	0.155	-0.00098	0.00014	0.99958	0.99902	1.00014
CD11b on CD33br HLA DR+ CD14dim	Weighted median	21	-0.00039	0.00021	0.057	-0.0008	1e-05	0.99961	0.9992	1.00001
CD11b on CD33br HLA DR+ CD14dim	Inverse variance weighted	21	-0.0003	0.00014	0.034	-0.00058	-2e-05	0.9997	0.99942	0.99998
CD11b on CD33br HLA DR+ CD14dim	Simple mode	21	-0.00045	0.00033	0.183	-0.00109	0.00019	0.99955	0.99891	1.00019
CD11b on CD33br HLA DR+ CD14dim	Weighted mode	21	-0.00042	0.00023	0.088	-0.00087	4e-05	0.99958	0.99913	1.00004
CD33br HLA DR+ CD14- %CD33br HLA DR+	MR Egger	18	0.00065	0.00023	0.012	0.0002	0.00109	1.00065	1.0002	1.00109
CD33br HLA DR+ CD14- %CD33br HLA DR+	Weighted median	18	0.00049	0.0002	0.011	0.00011	0.00088	1.00049	1.00011	1.00088
CD33br HLA DR+ CD14- %CD33br HLA DR+	Inverse variance weighted	18	0.00032	0.00014	0.021	5e-05	0.0006	1.00032	1.00005	1.0006
CD33br HLA DR+ CD14- %CD33br HLA DR+	Simple mode	18	0.00056	0.0003	0.078	-3e-05	0.00114	1.00056	0.99997	1.00114
CD33br HLA DR+ CD14- %CD33br HLA DR+	Weighted mode	18	0.00053	0.00021	0.023	0.00011	0.00094	1.00053	1.00011	1.00094
CD4/CD8br	MR Egger	14	0.00045	0.00043	0.319	-0.0004	0.0013	1.00045	0.9996	1.0013
CD4/CD8br	Weighted median	14	0.00066	0.00035	0.058	-2e-05	0.00134	1.00066	0.99998	1.00134
CD4/CD8br	Inverse variance weighted	14	0.00089	0.00025	0	0.0004	0.00137	1.00089	1.0004	1.00138
CD4/CD8br	Simple mode	14	0.00076	0.00053	0.172	-0.00027	0.0018	1.00076	0.99973	1.0018
CD4/CD8br	Weighted mode	14	0.00057	0.00038	0.154	-0.00017	0.00131	1.00057	0.99983	1.00131
