# Supplementary figures and images for: Causal relationship between immune cells and bladder cancer: a bi-directional Mendelian randomization study
Source: Research Square preprint supplement (doi:10.21203/rs.3.rs-4540897/v1), 2024-06-26

**
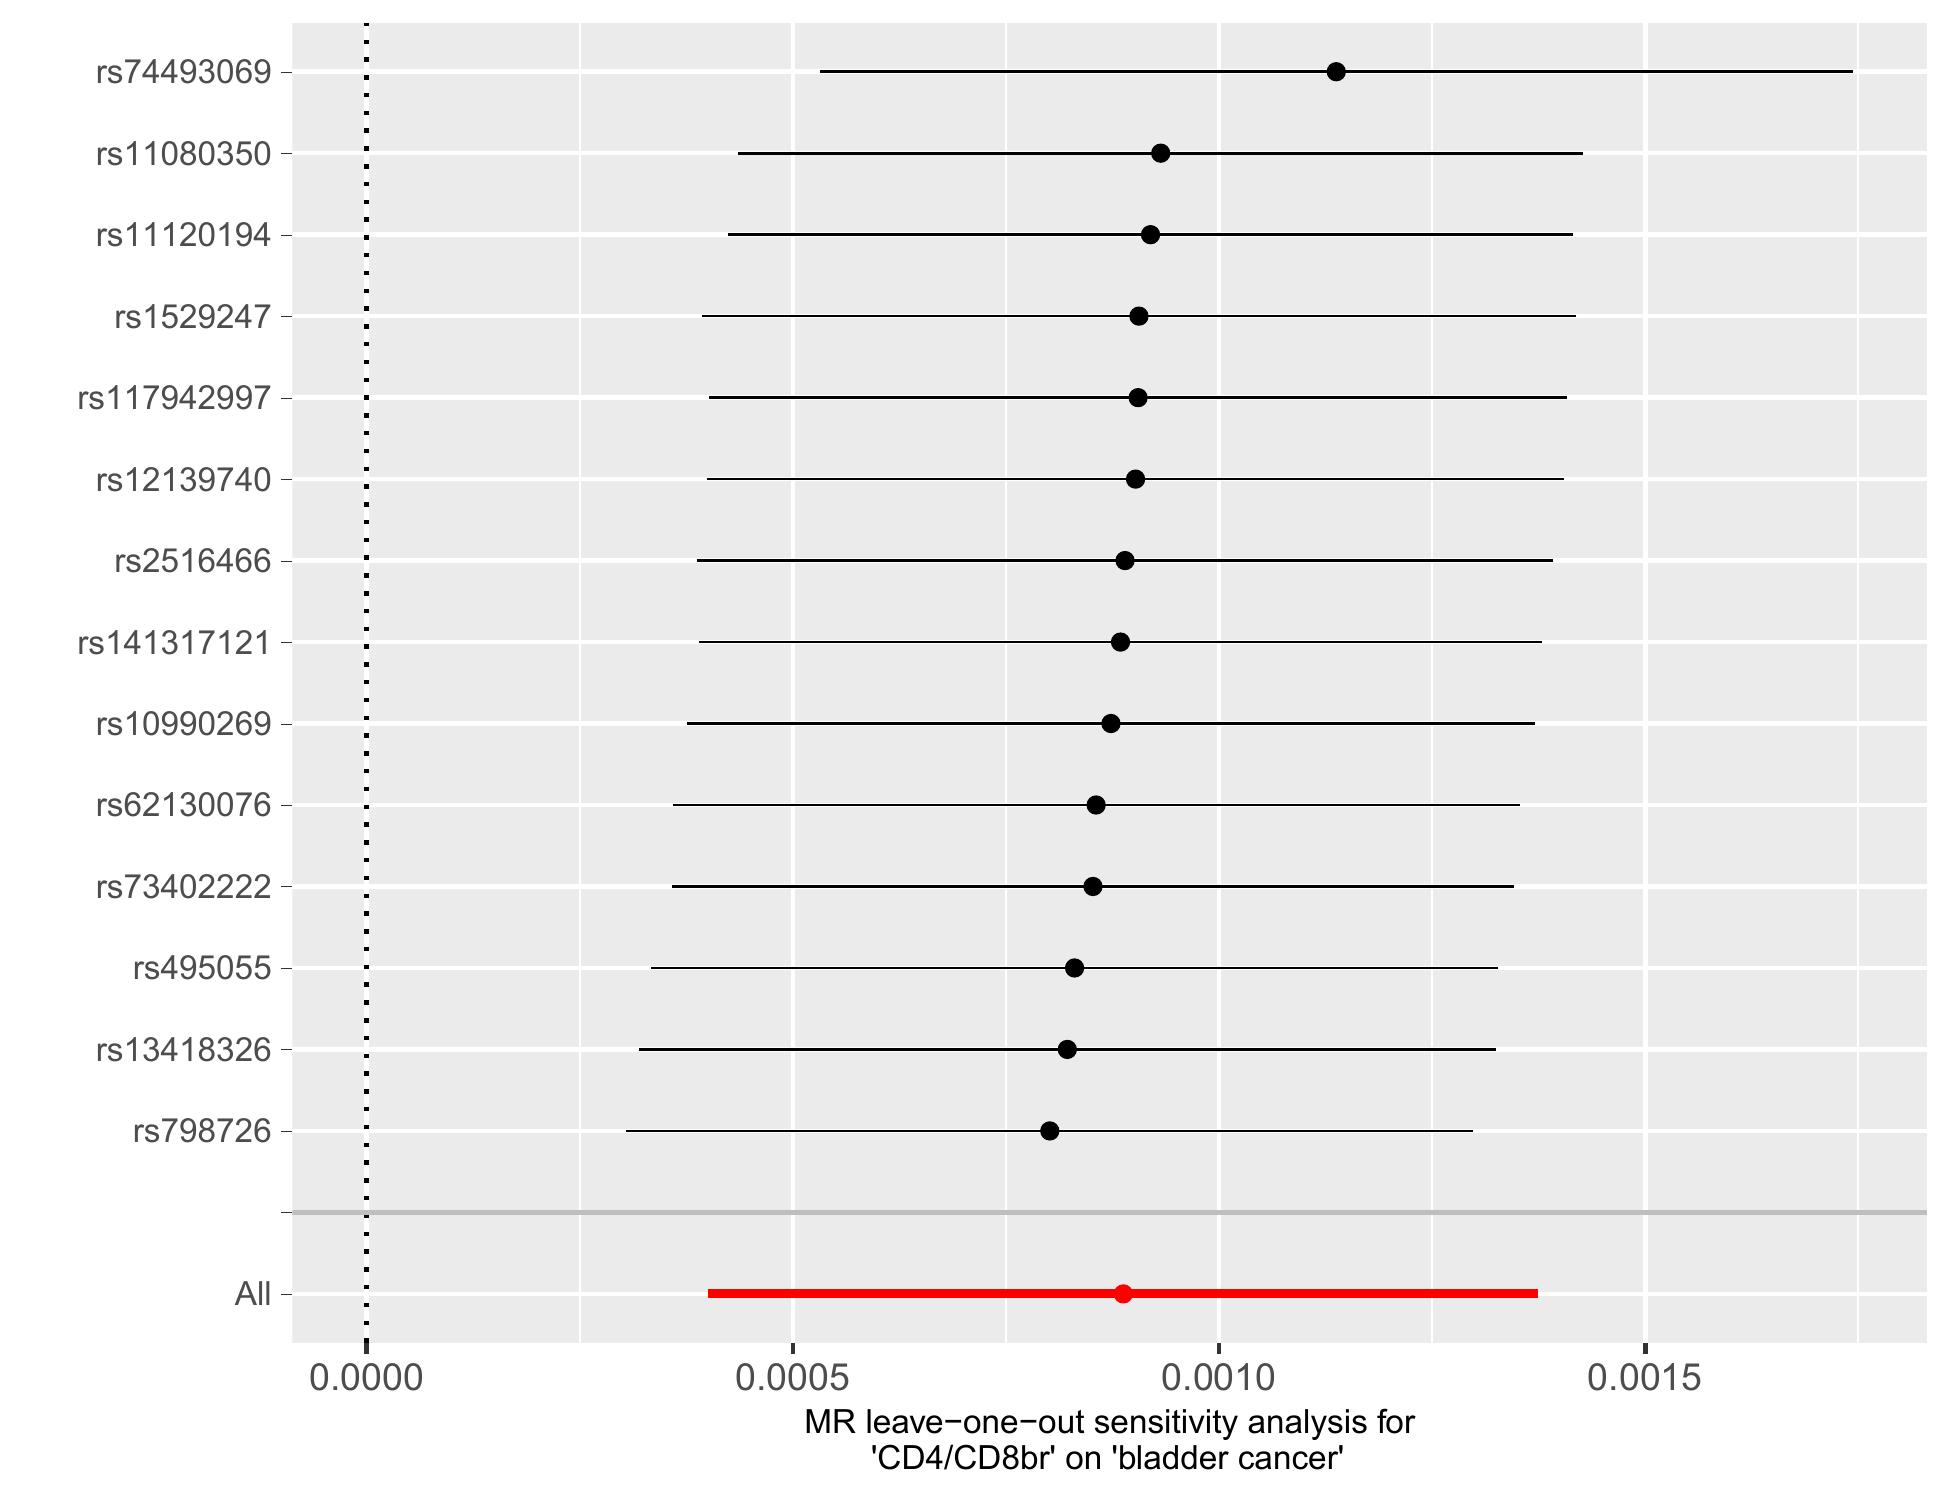

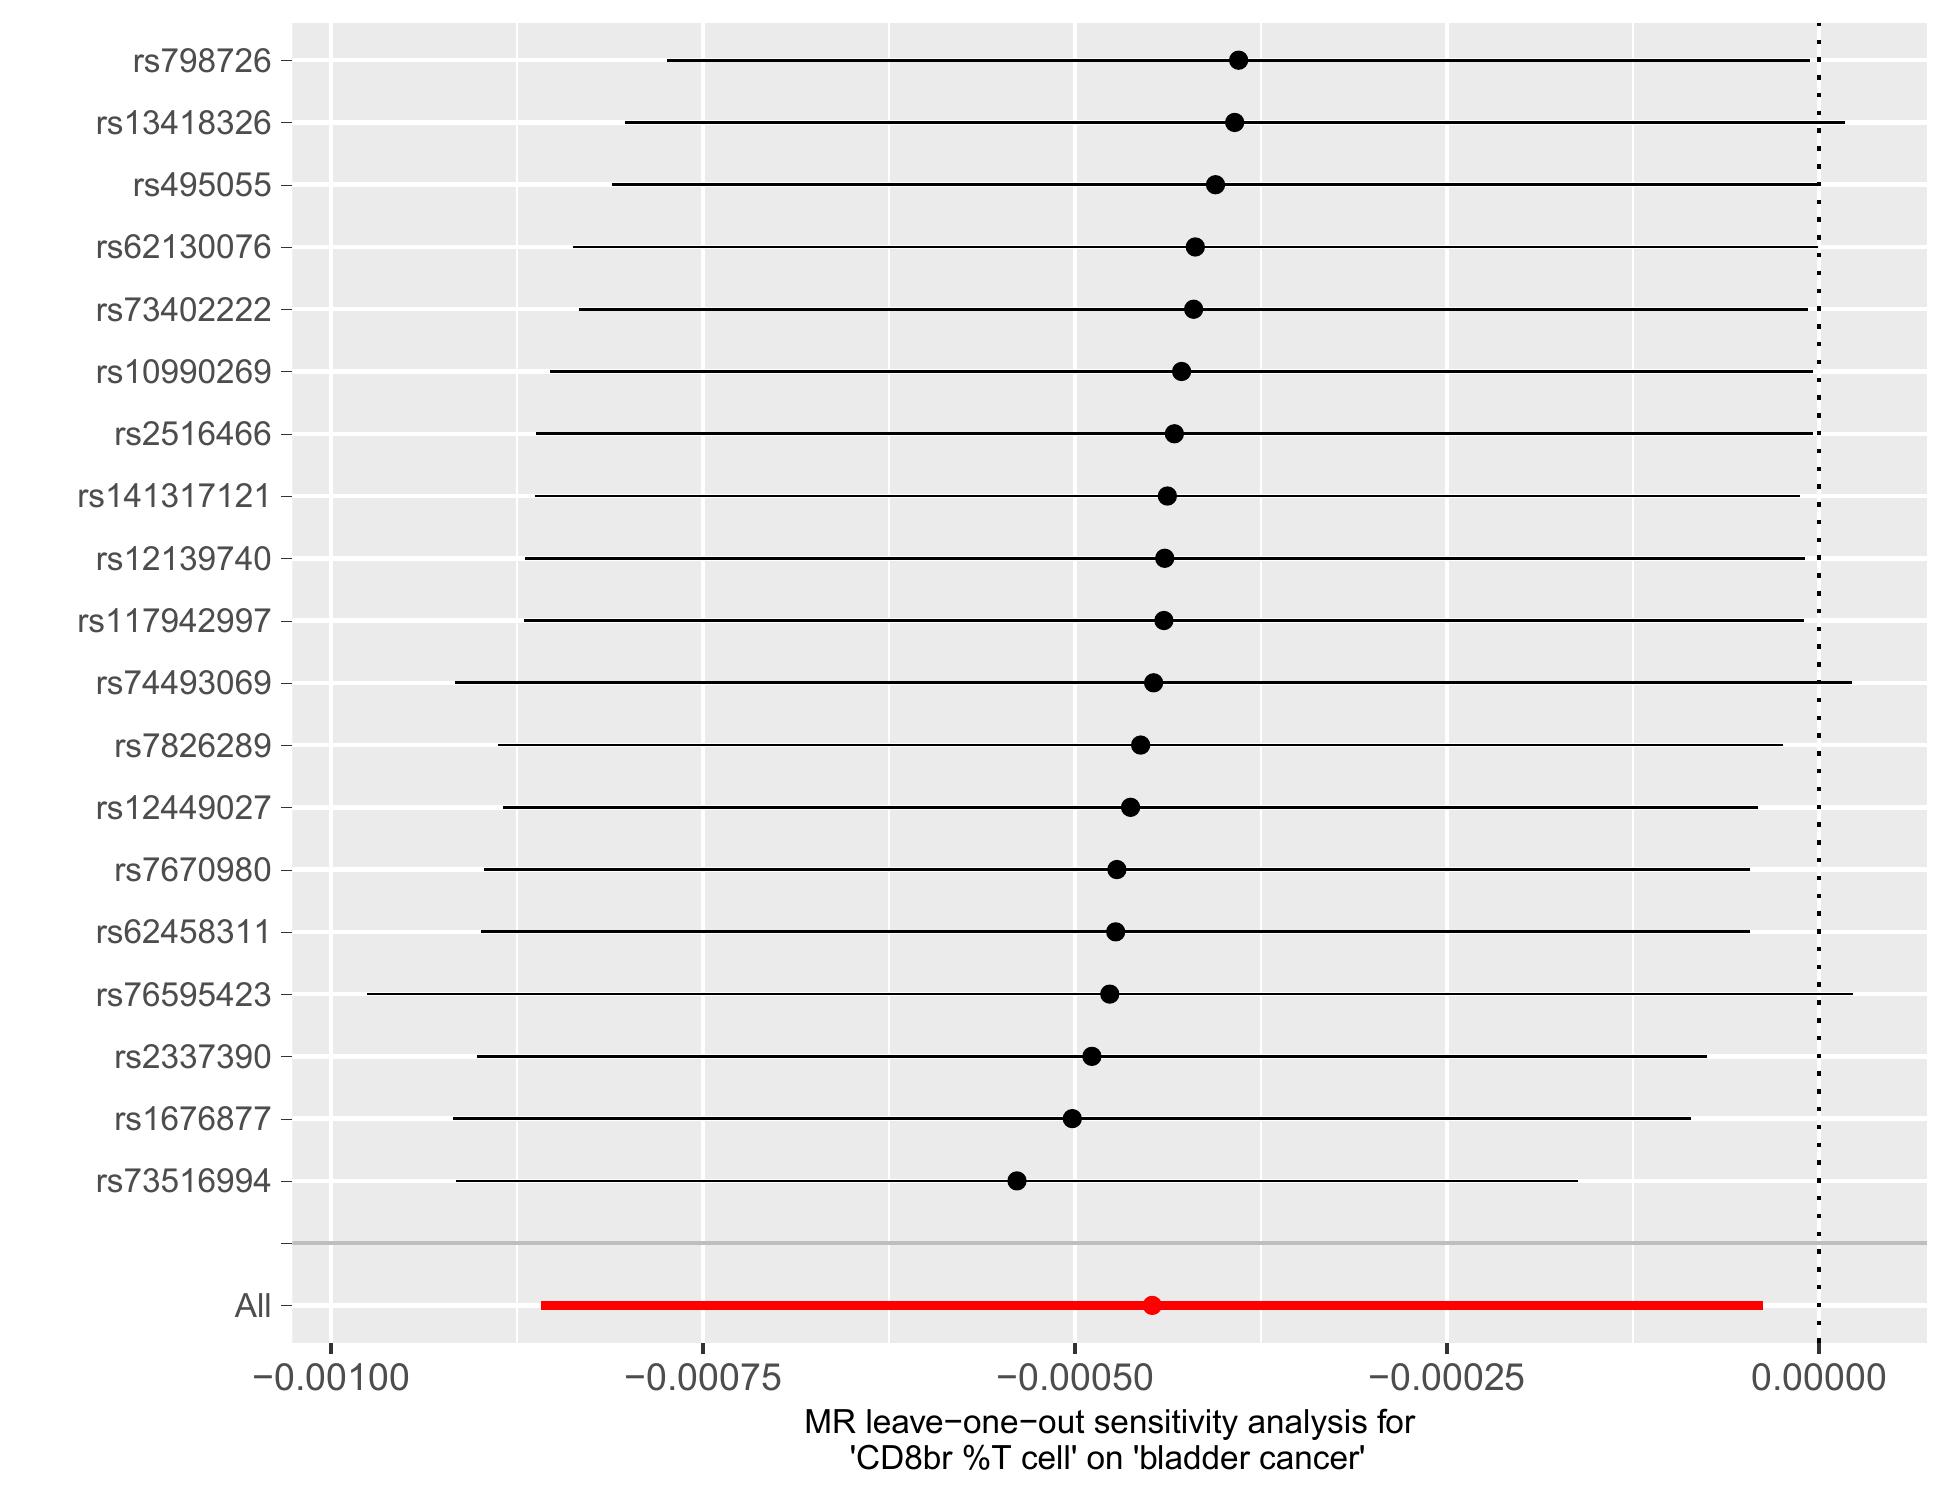

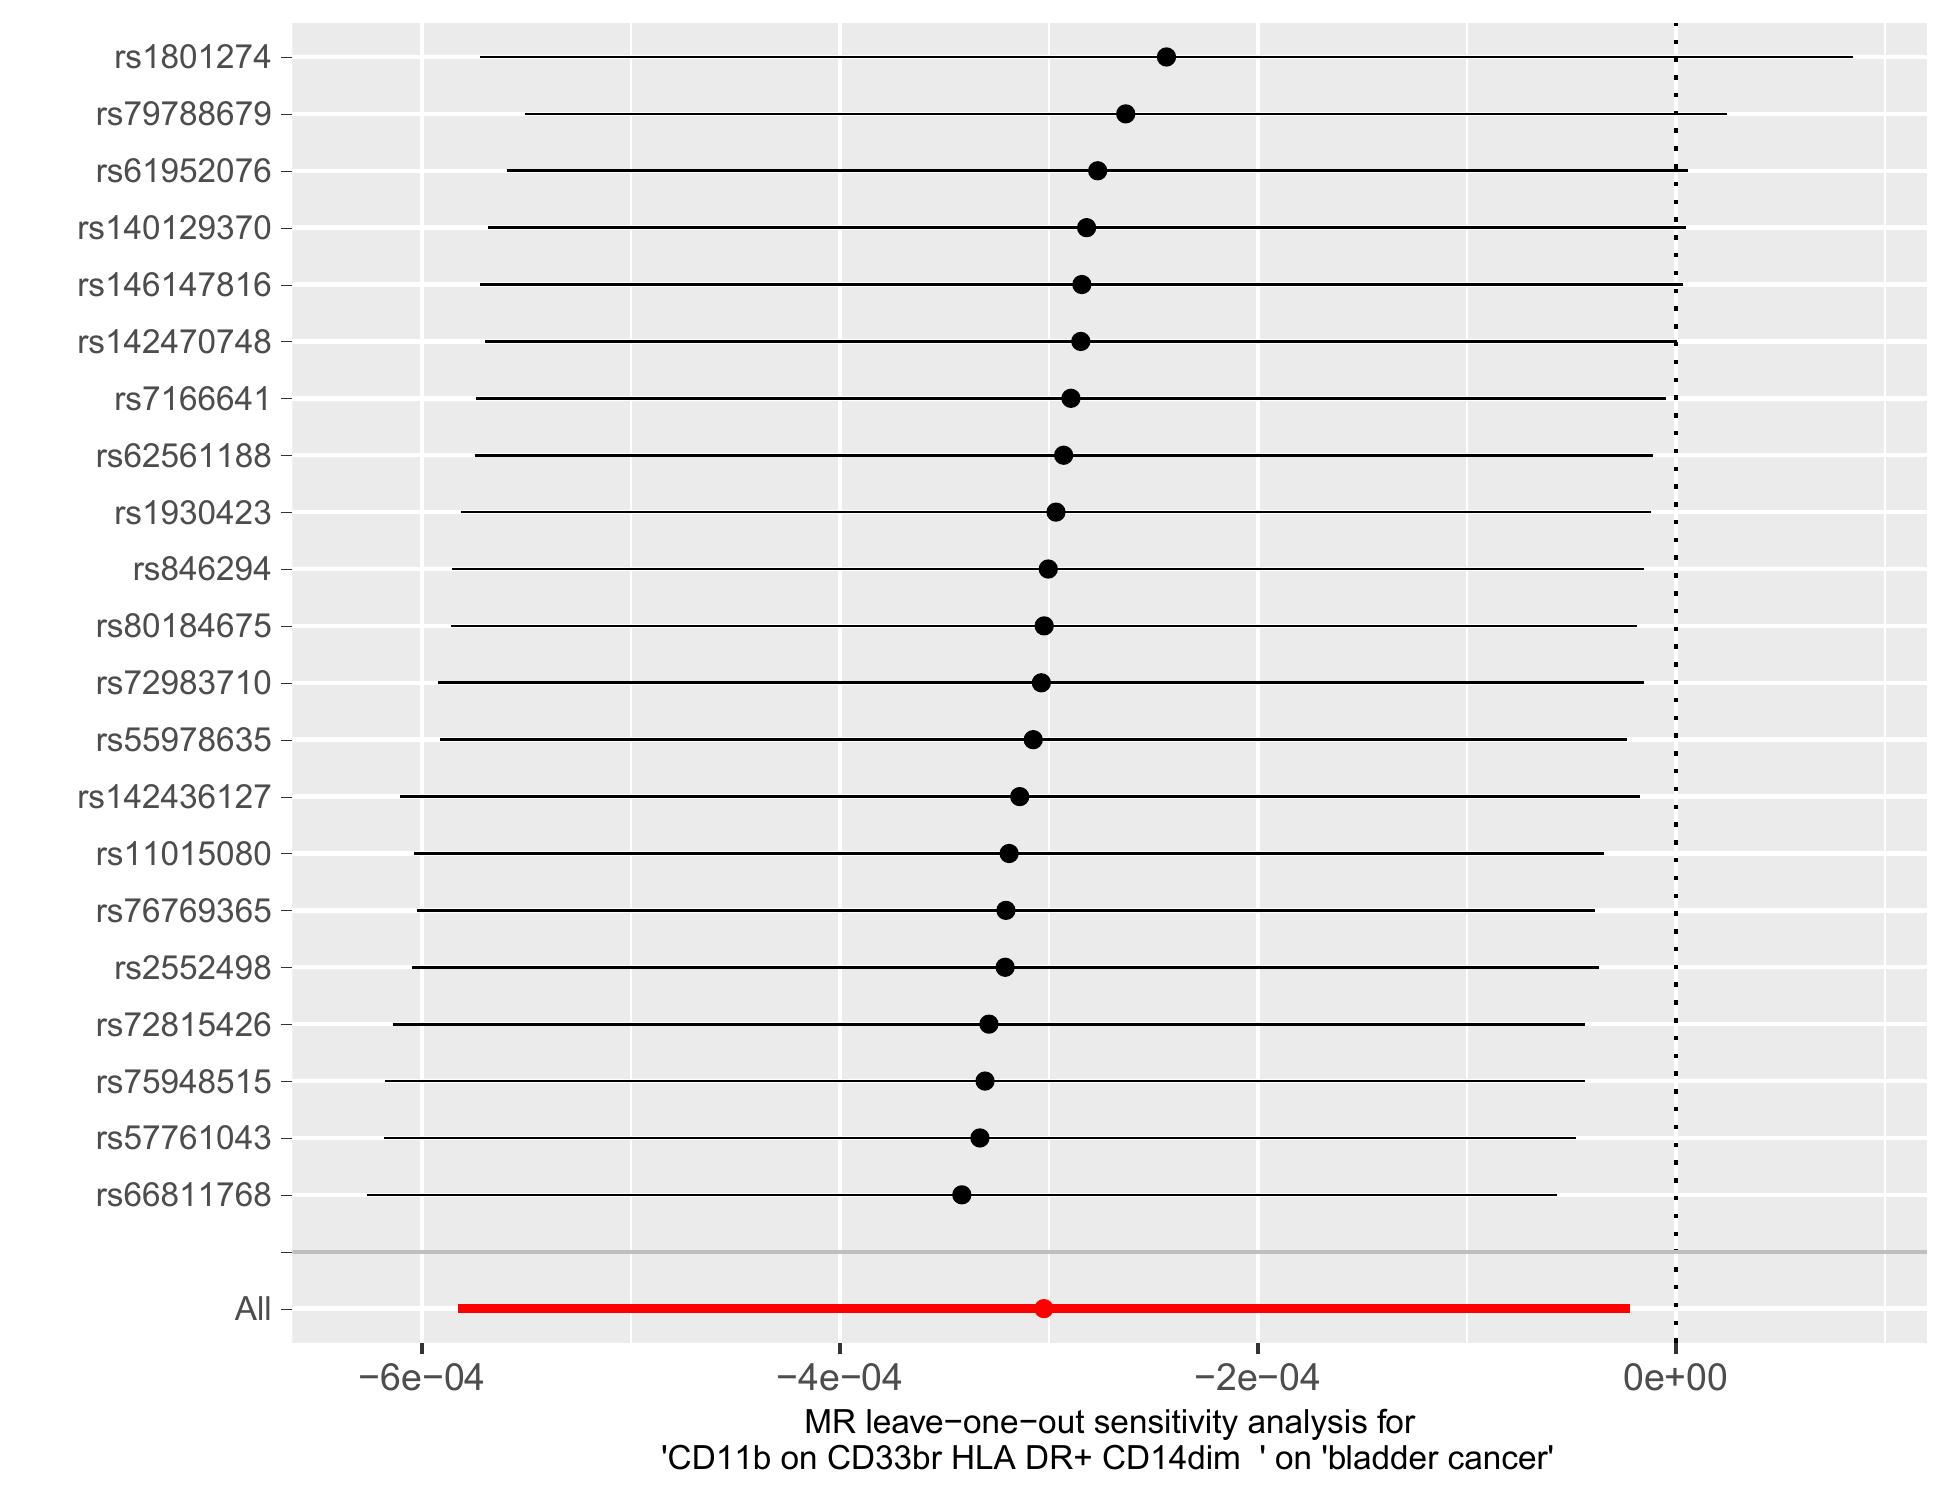

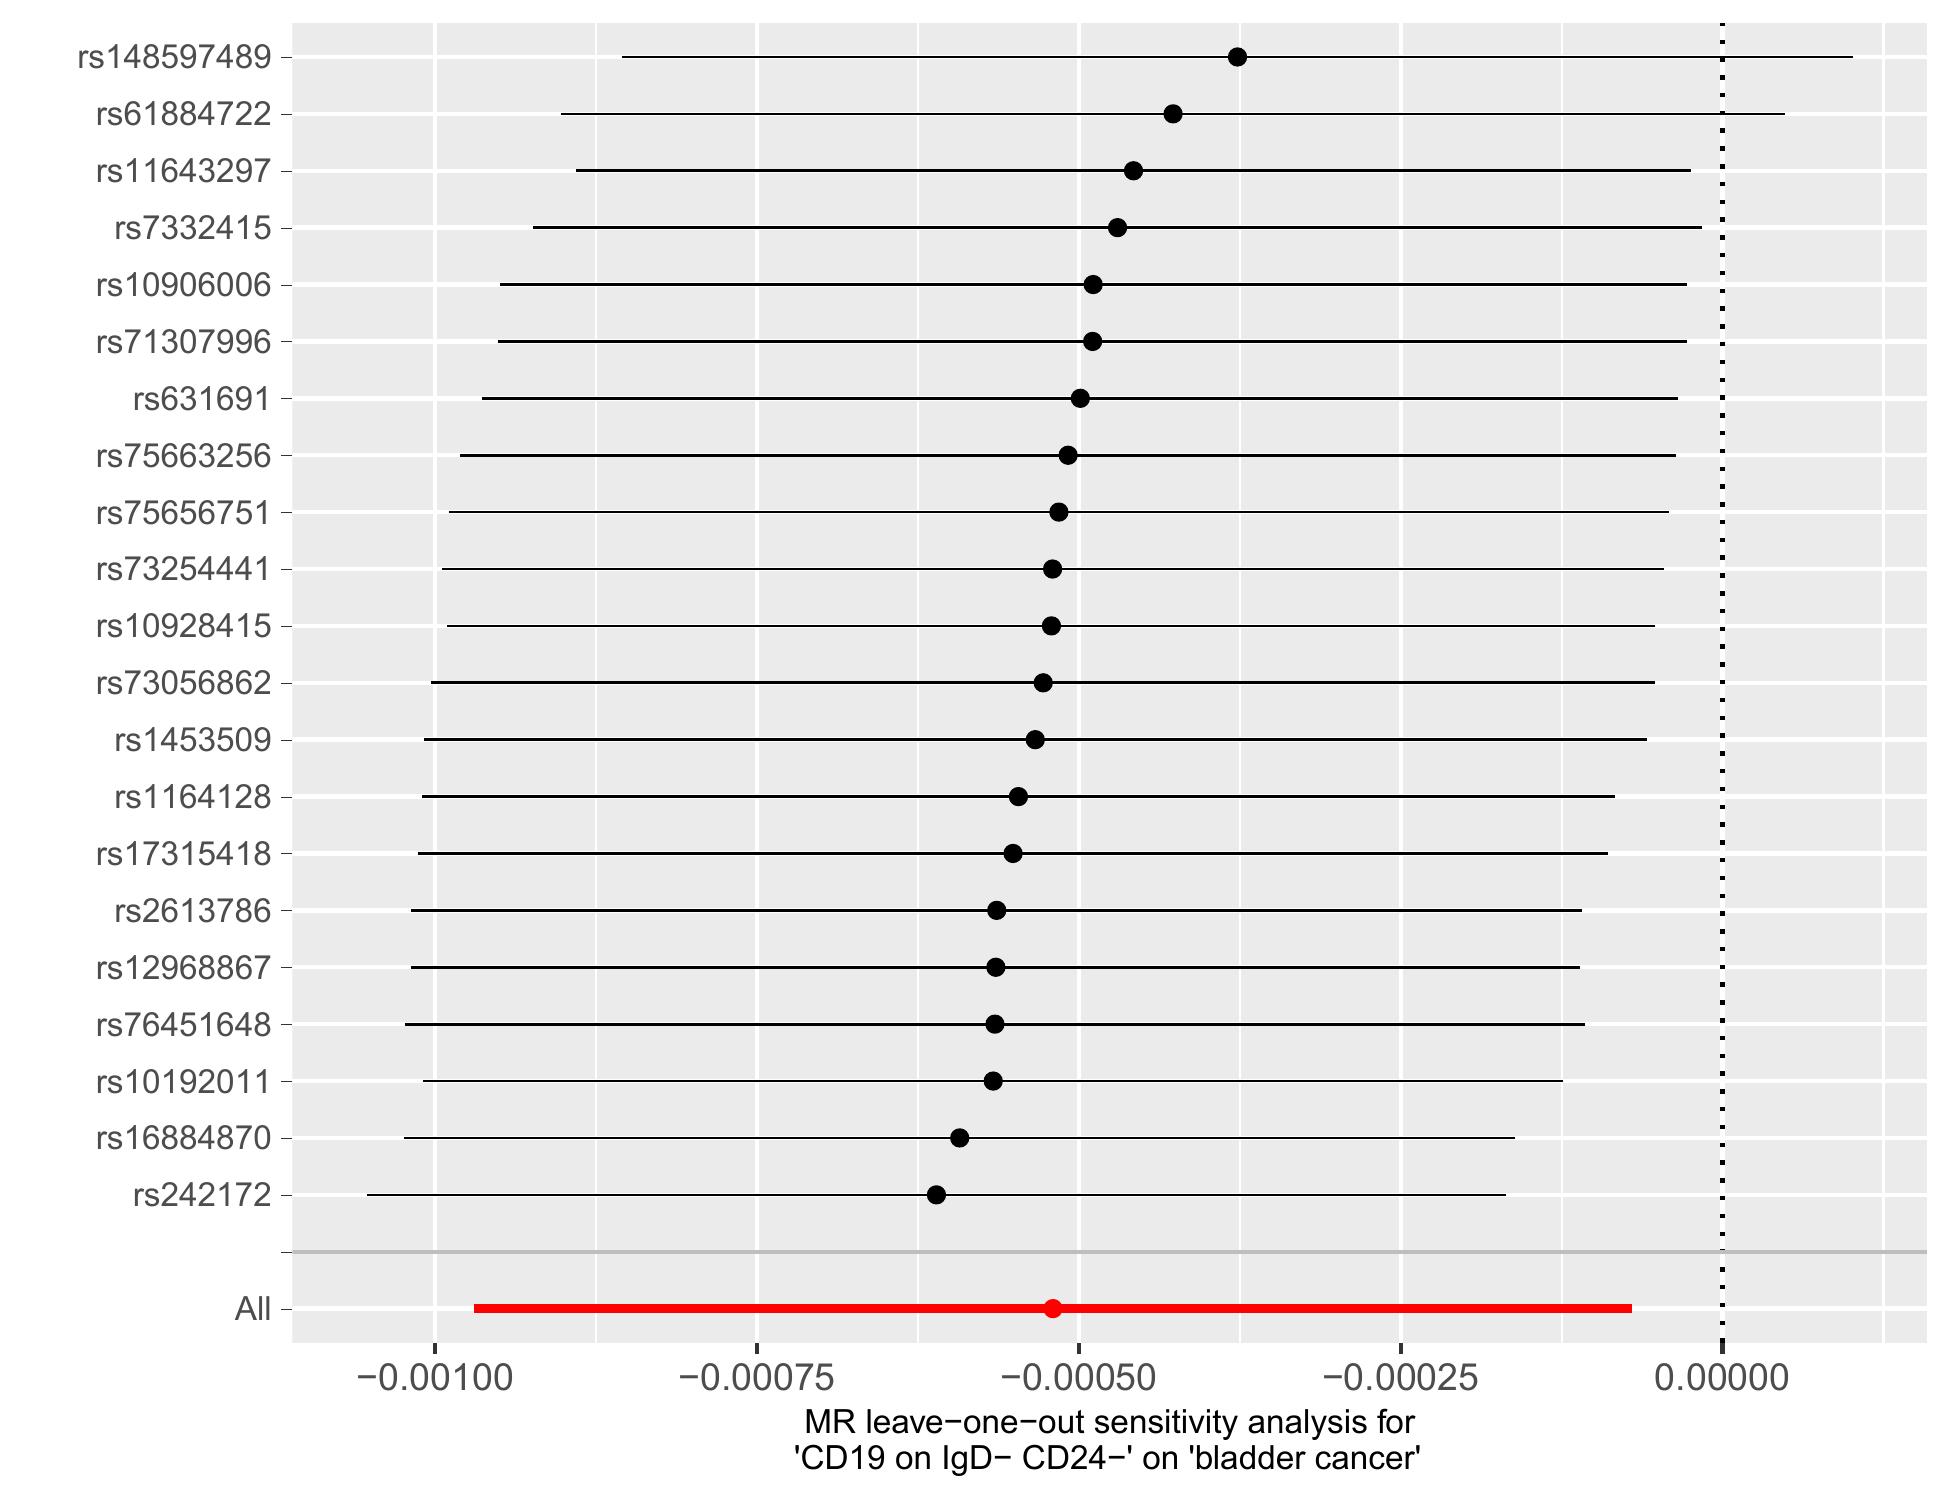

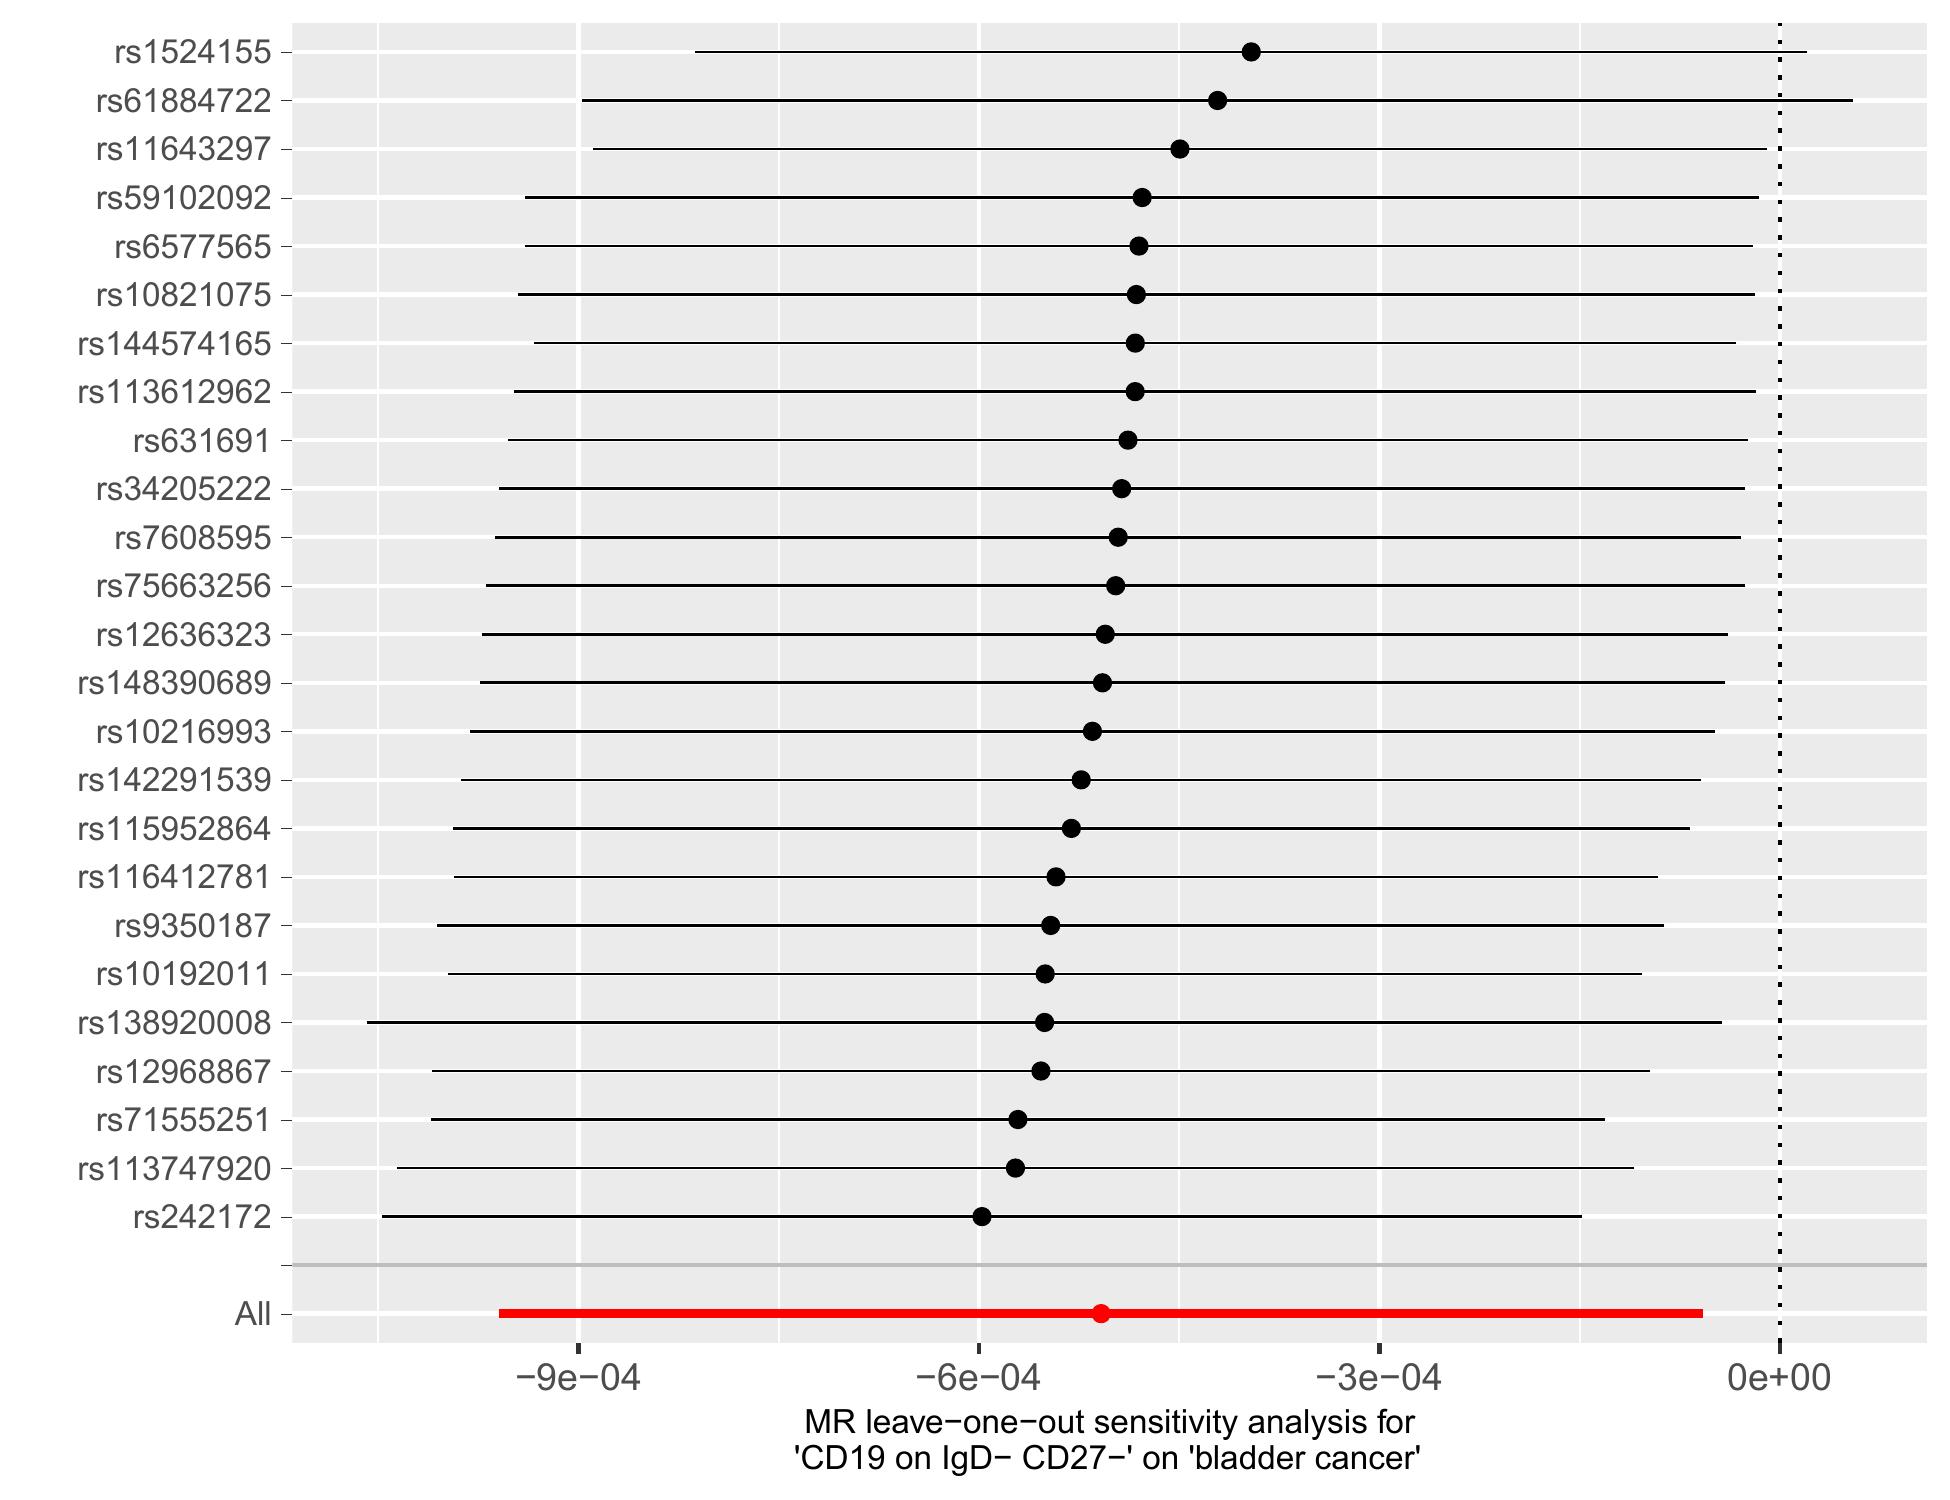

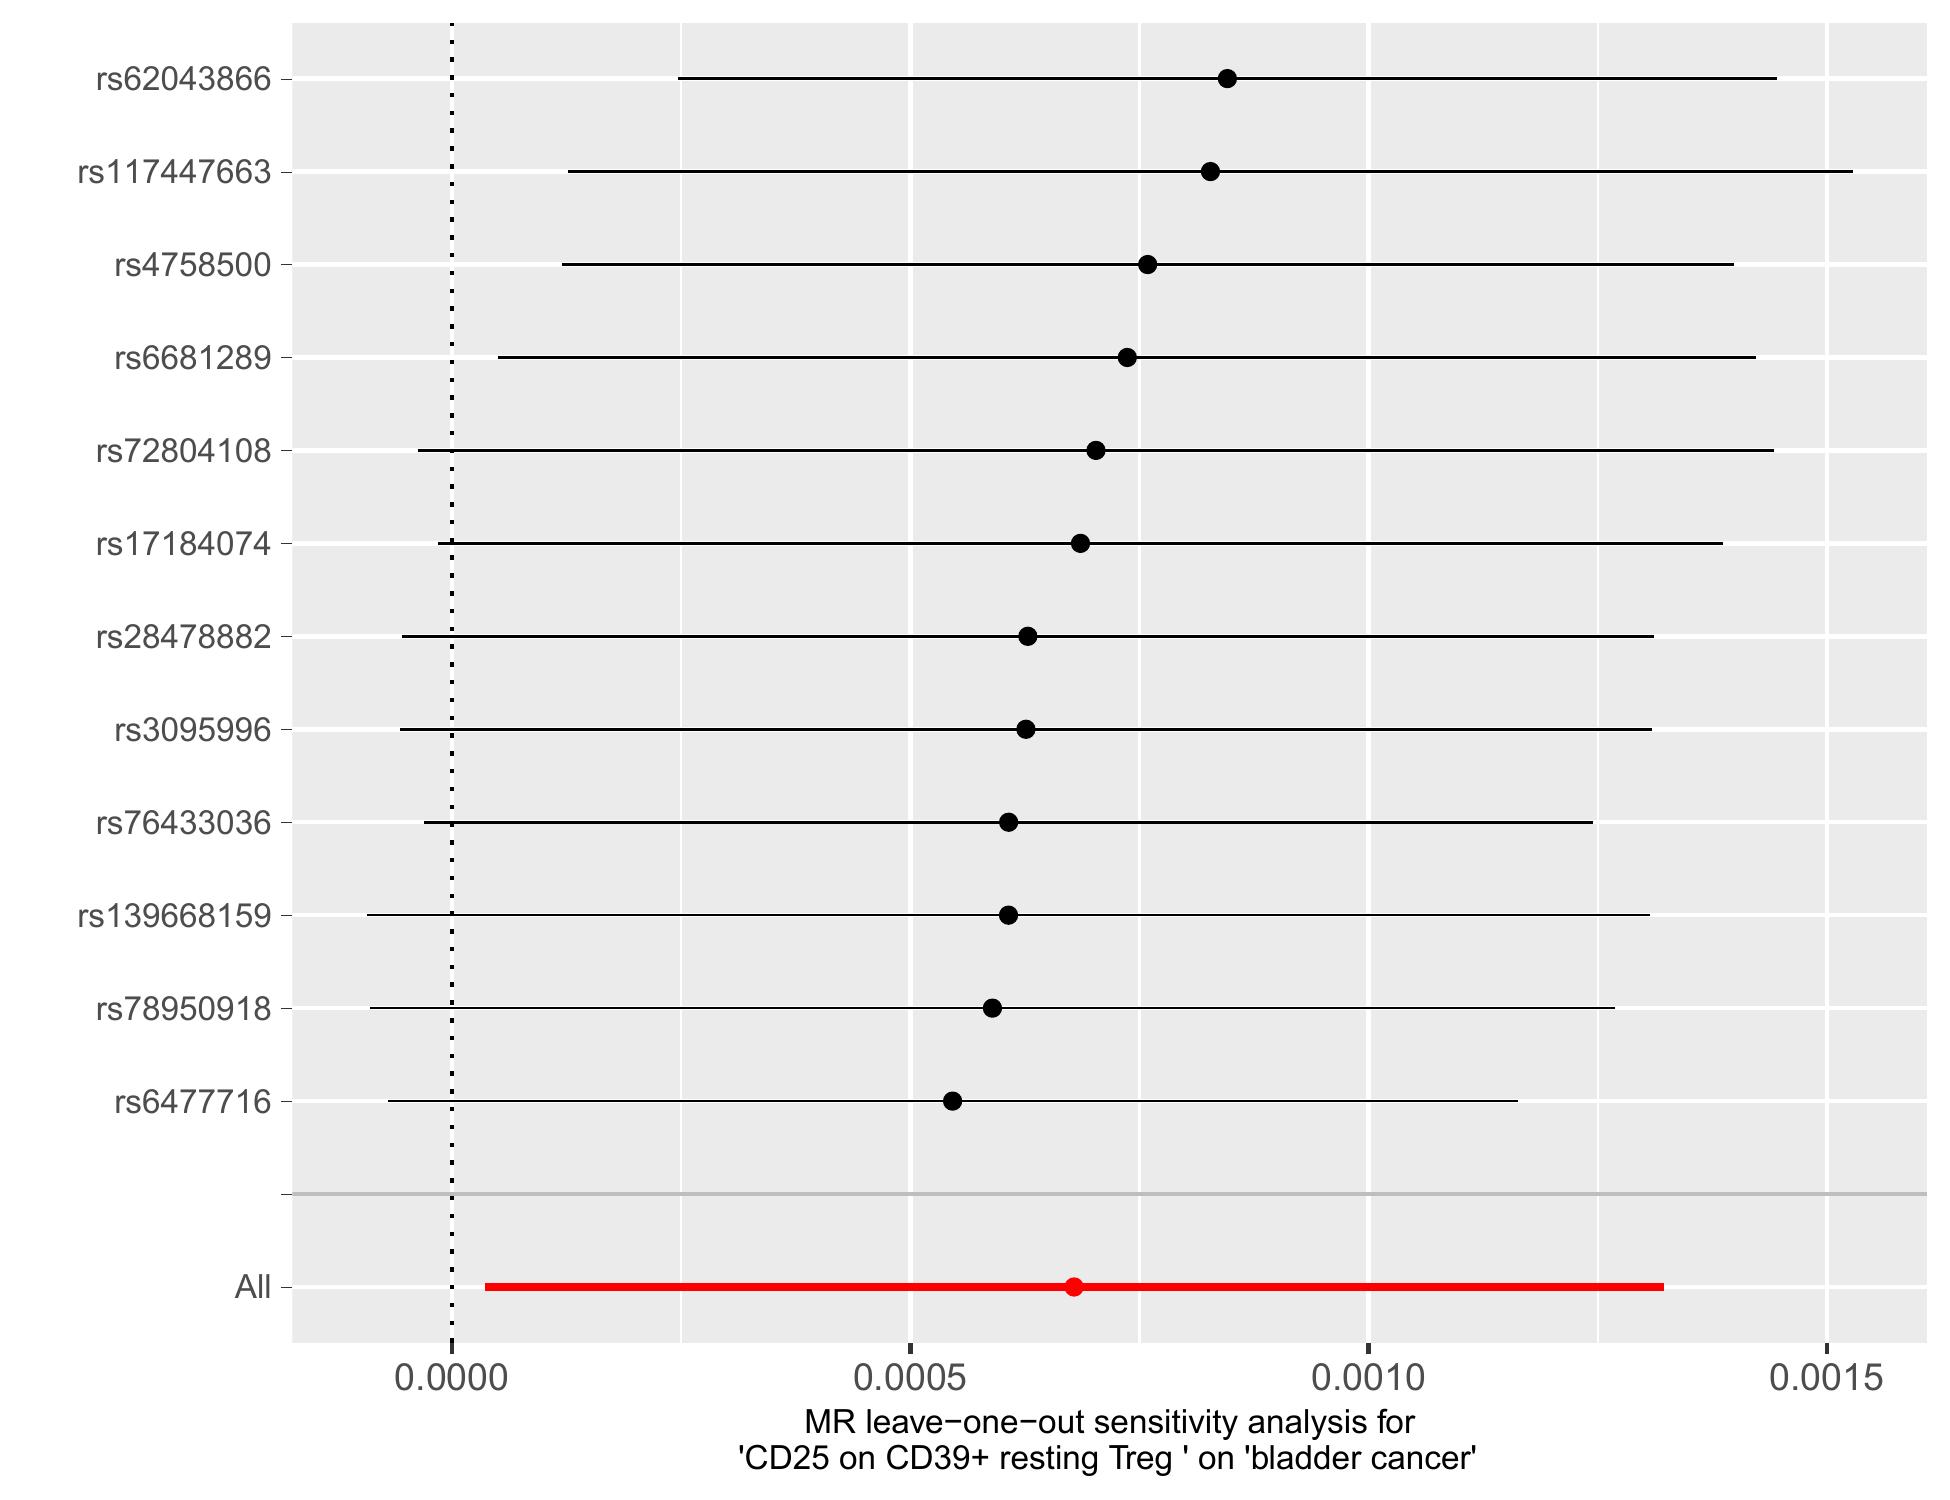

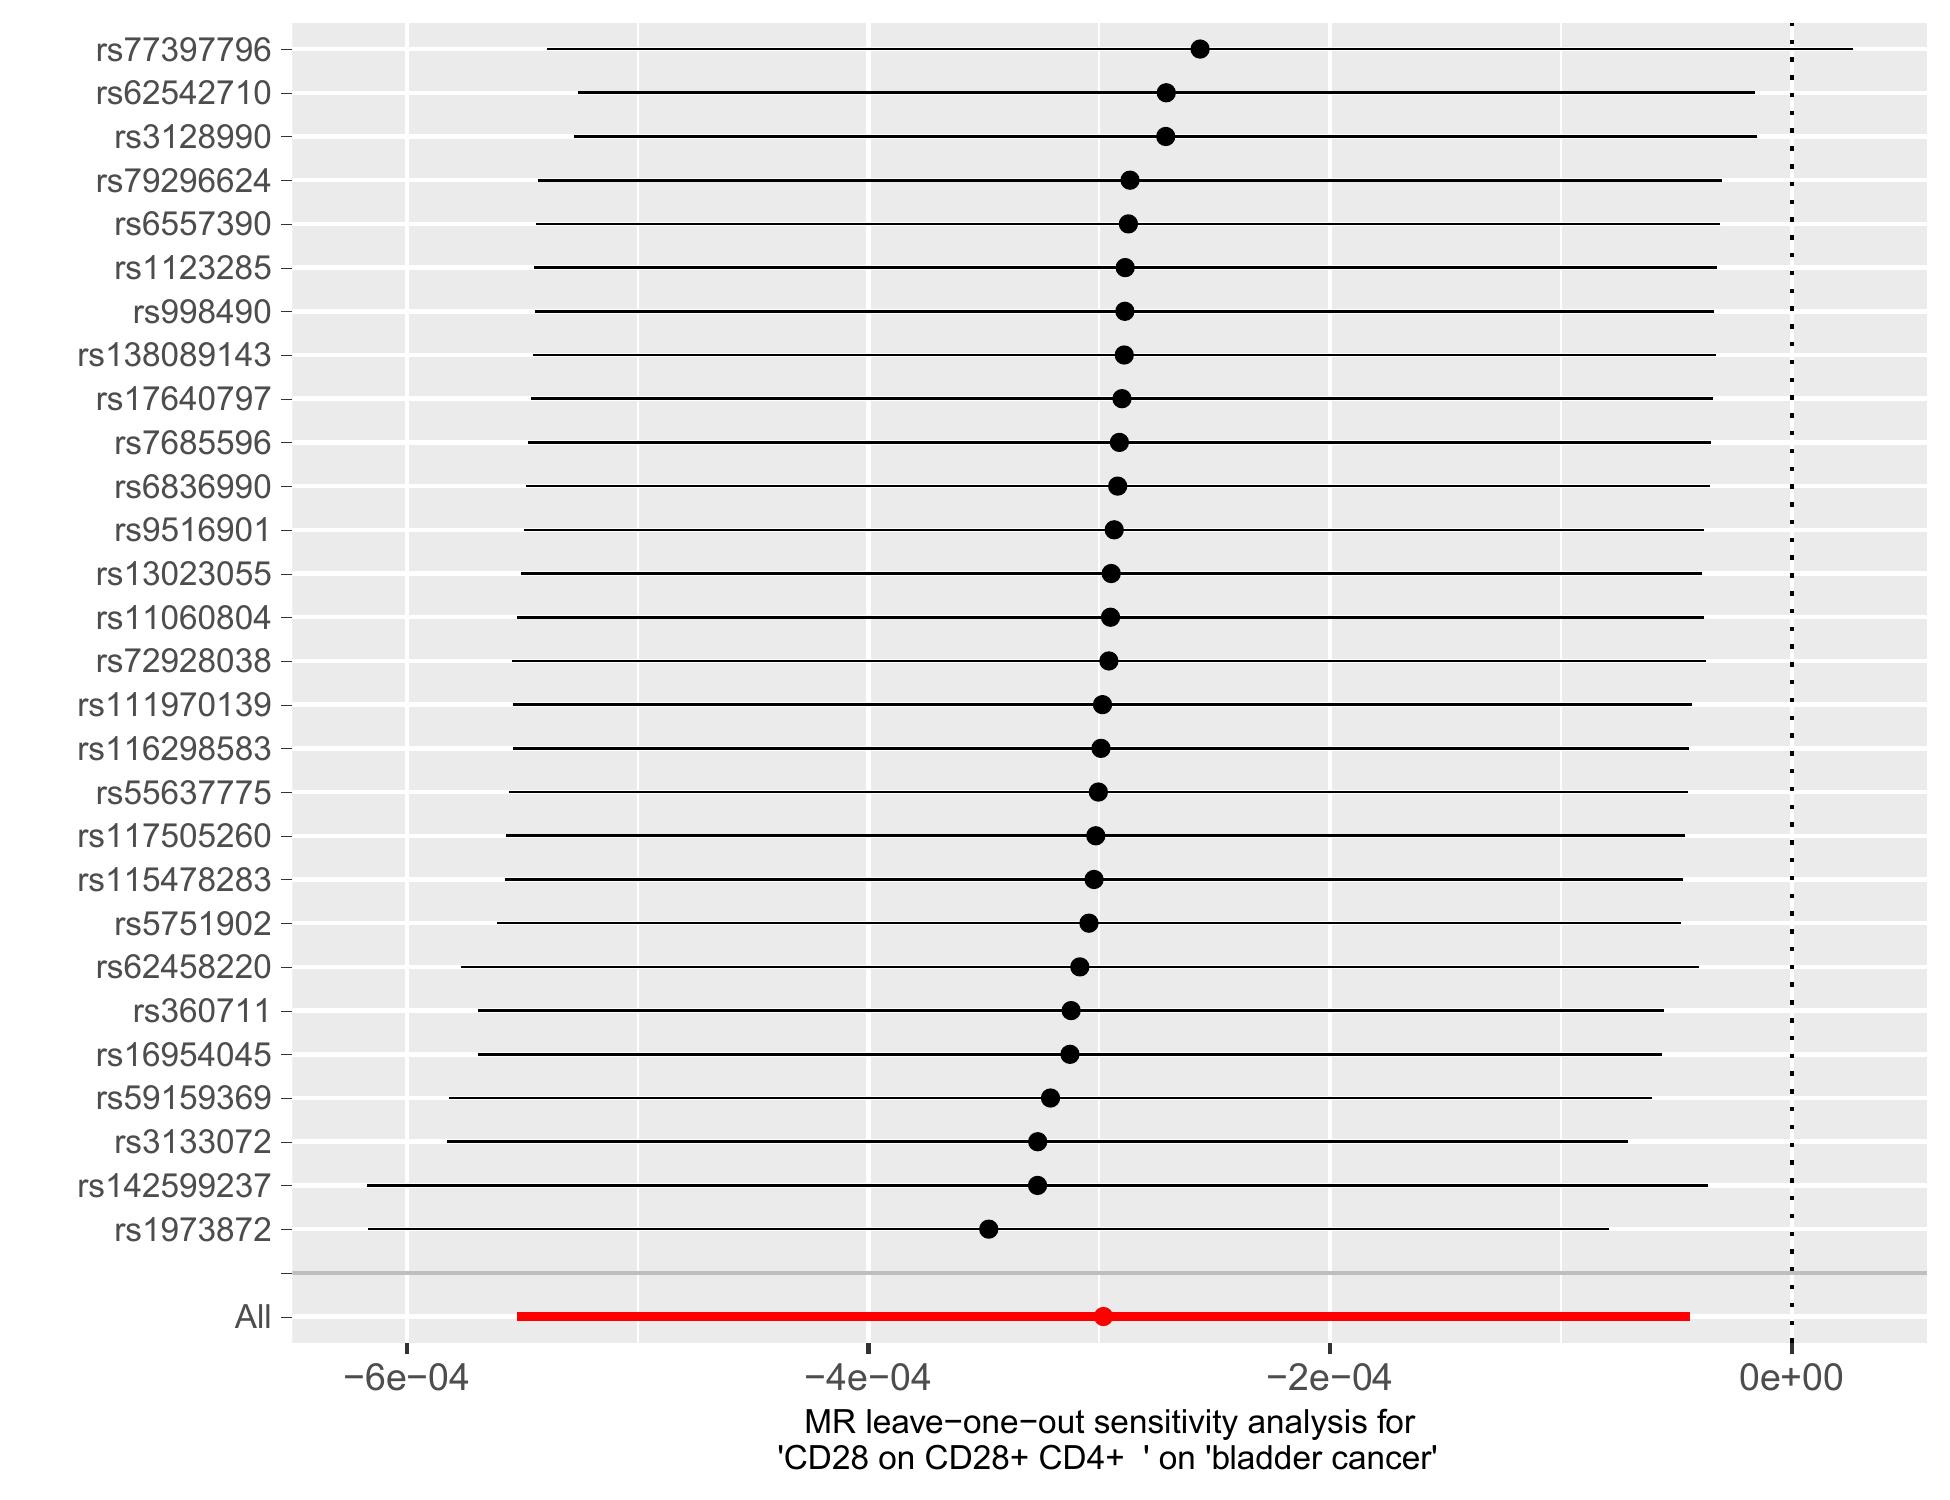

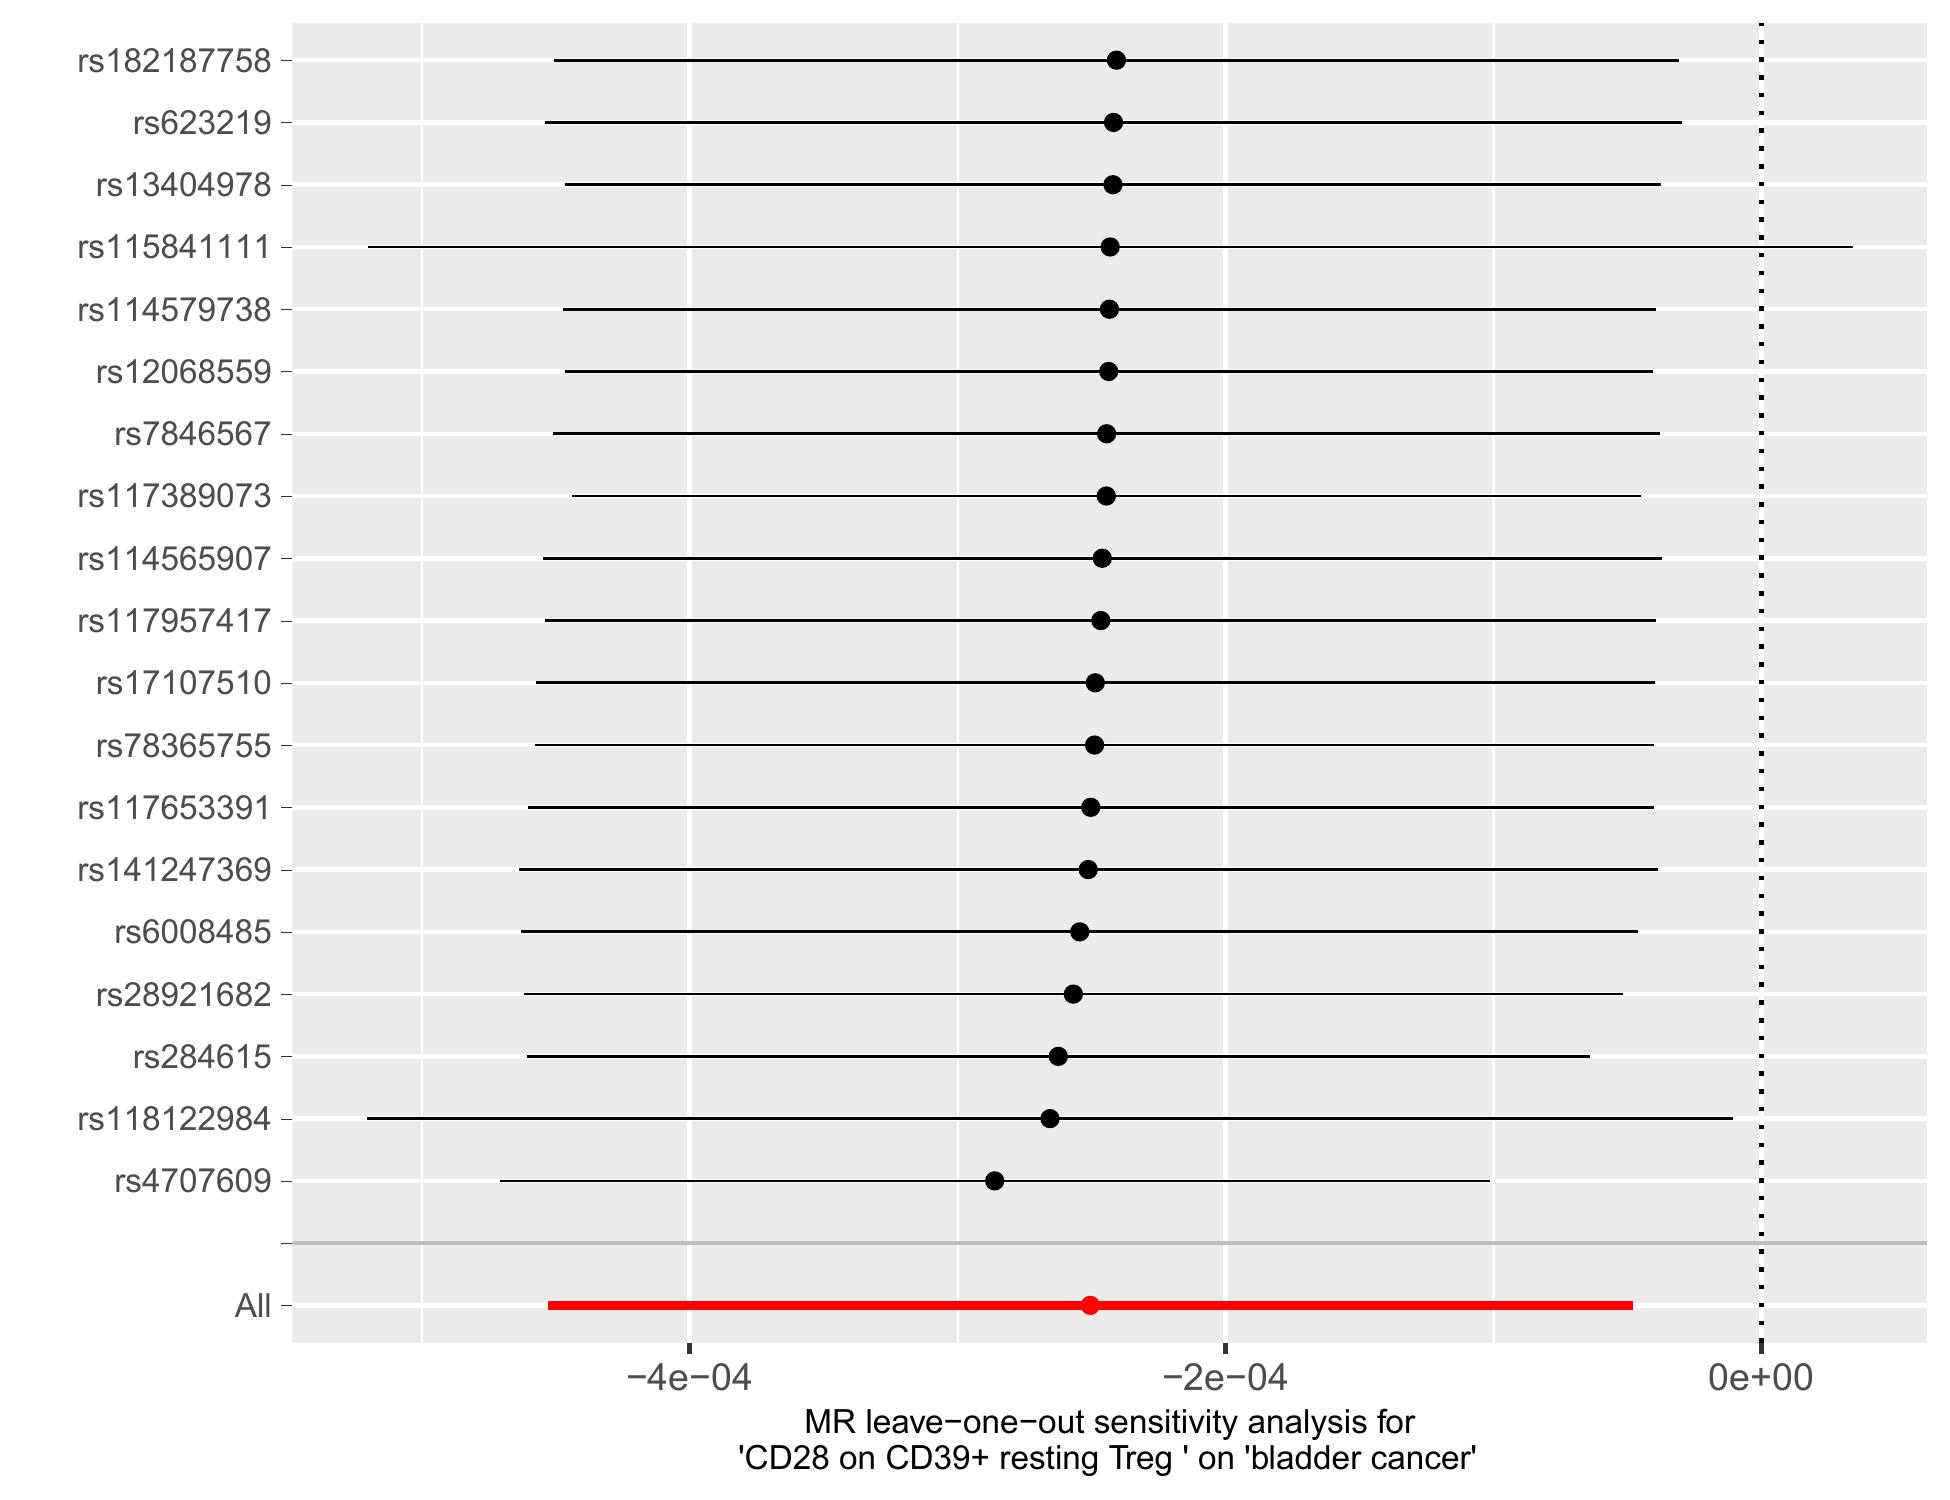

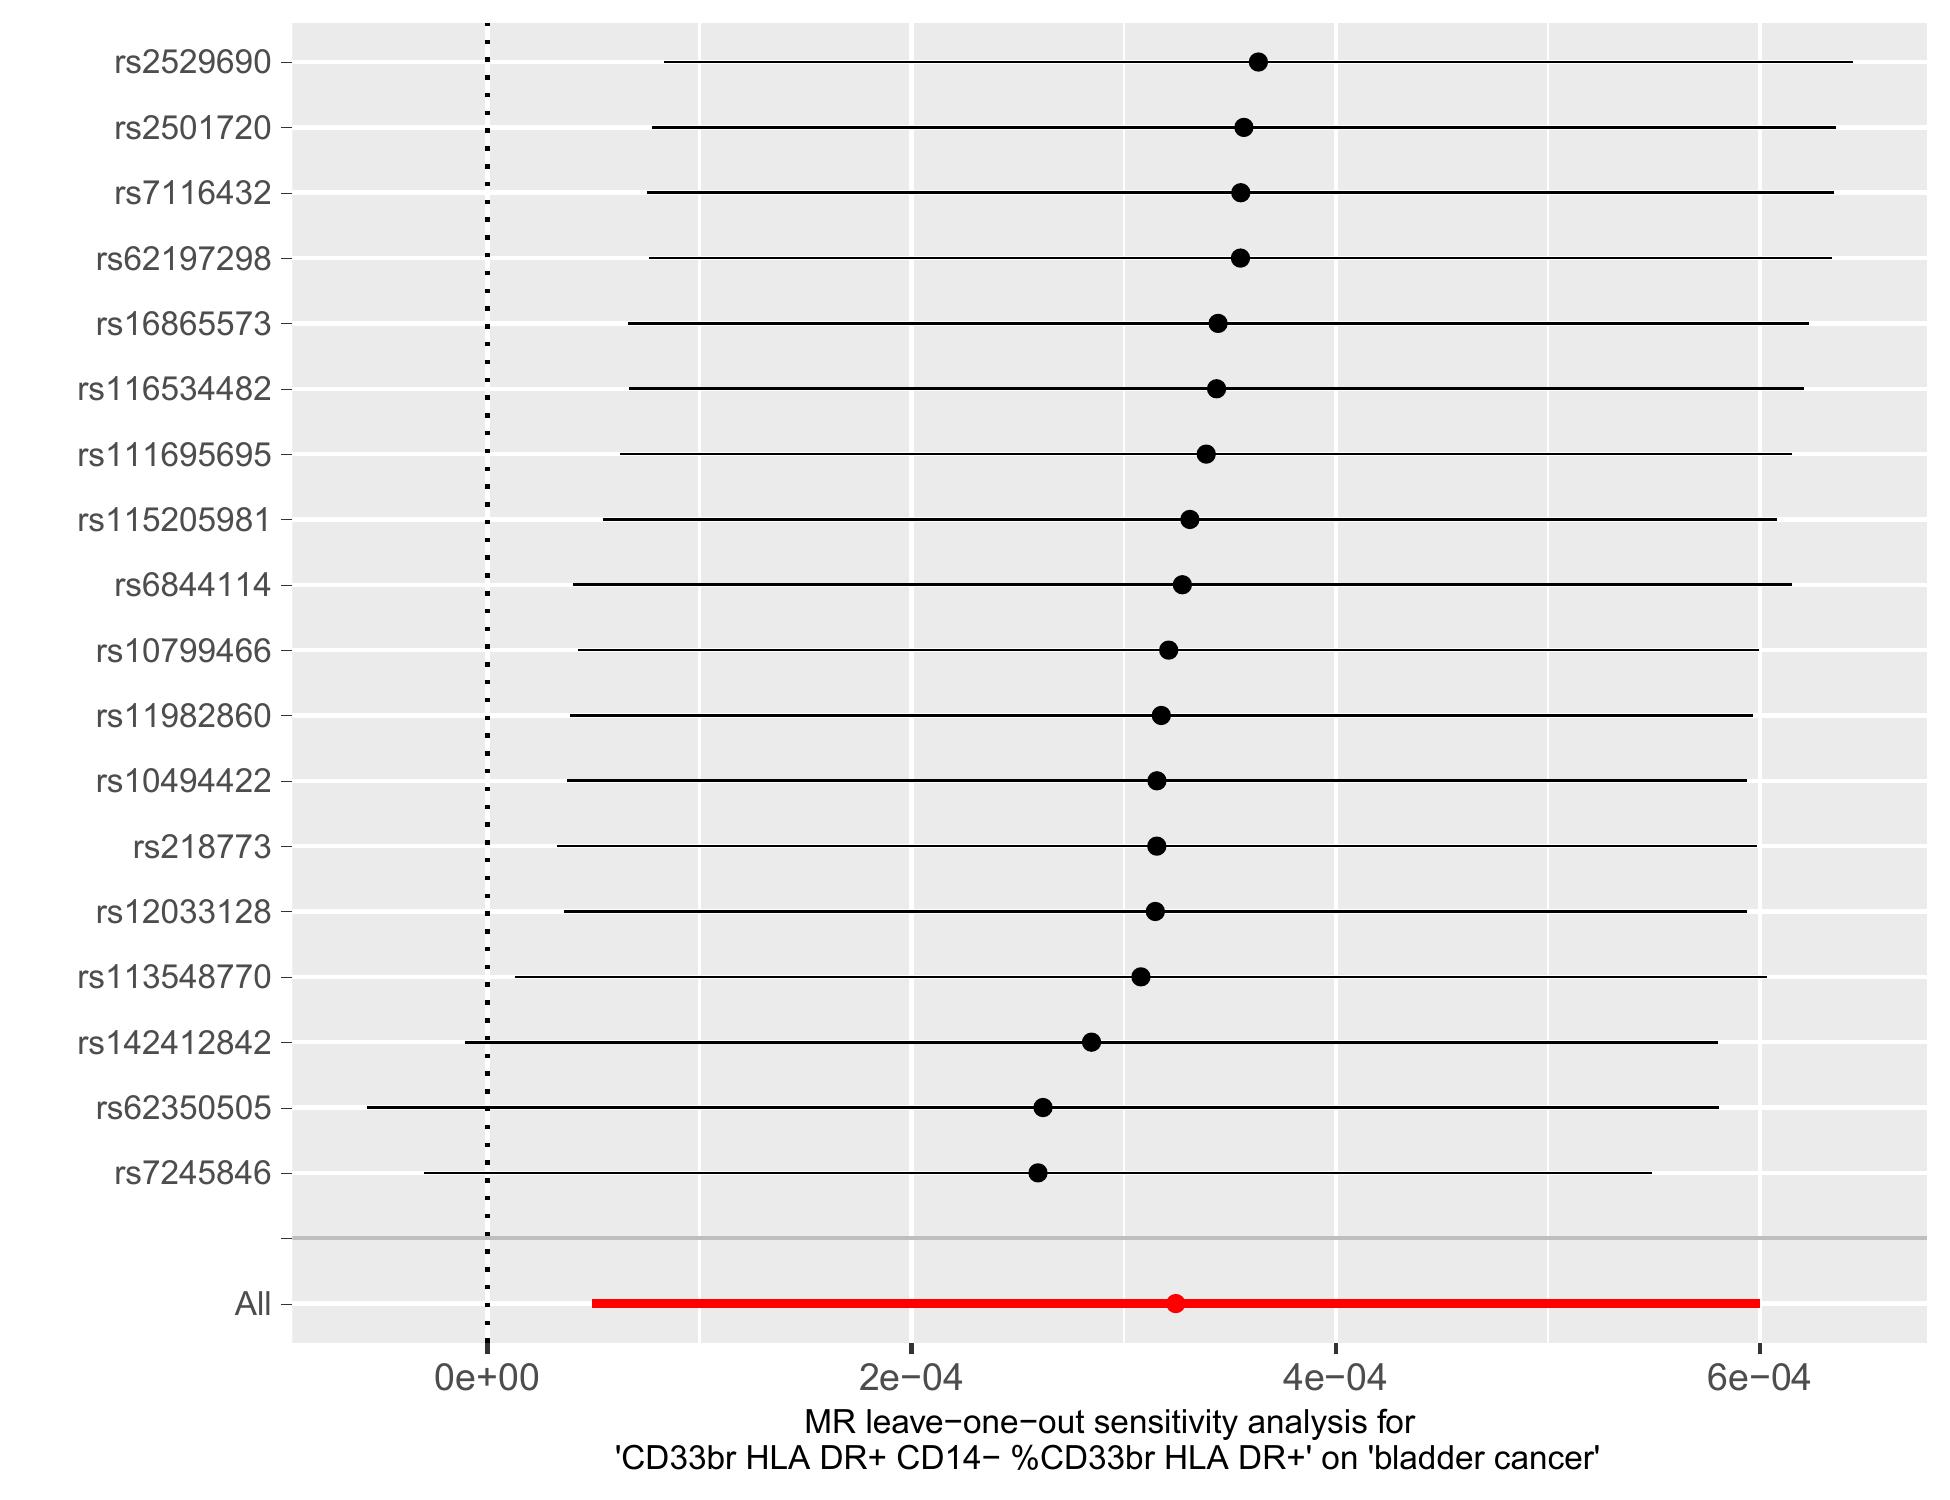

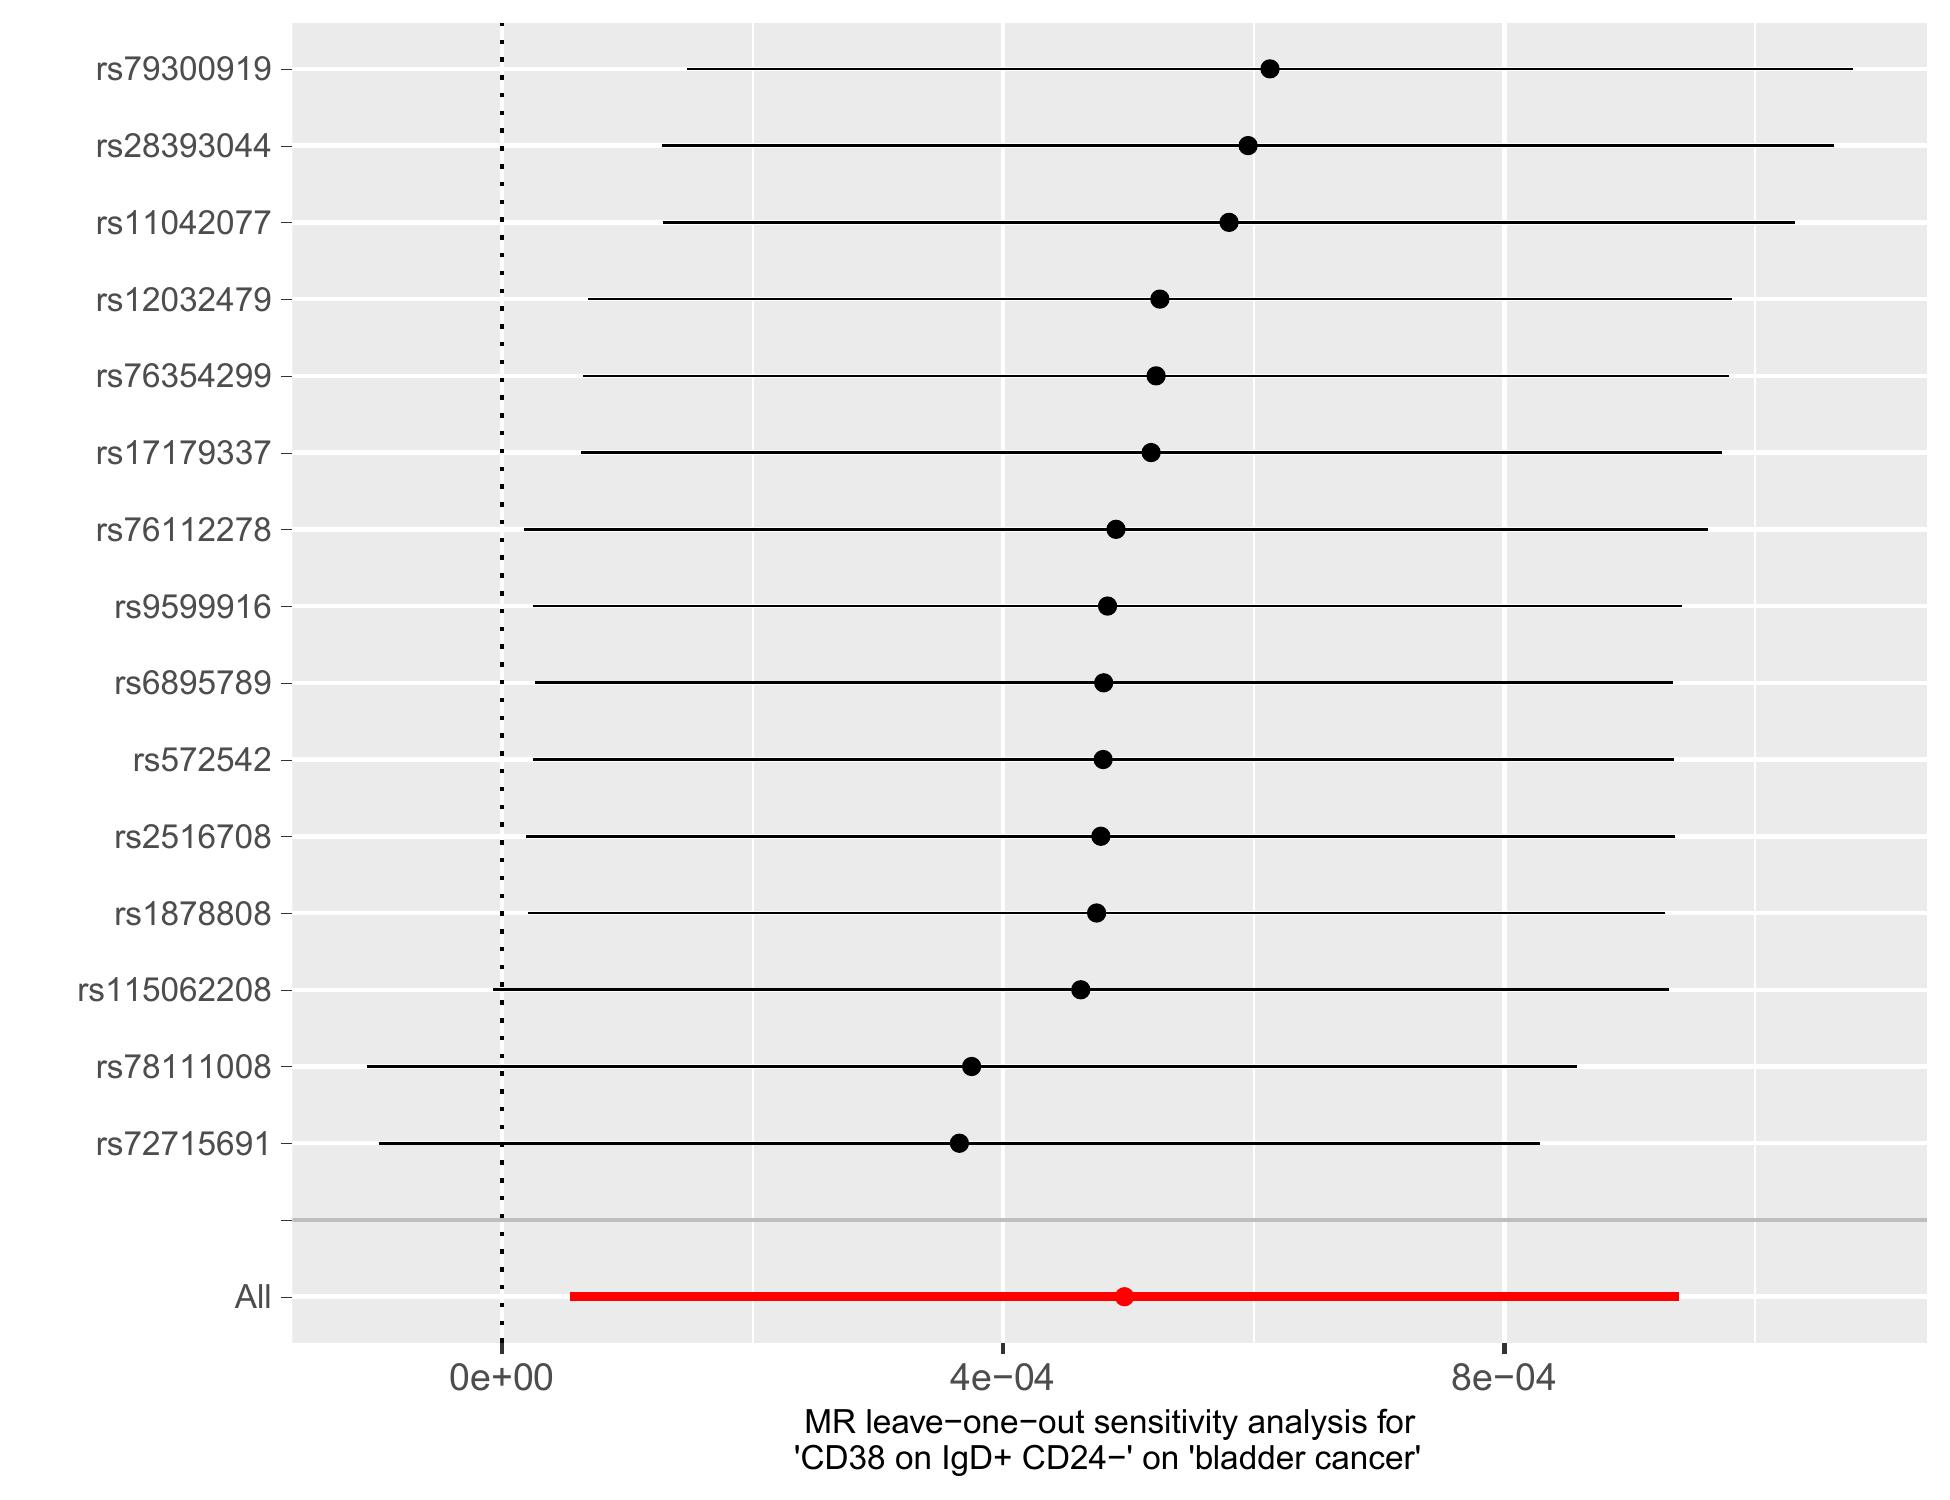

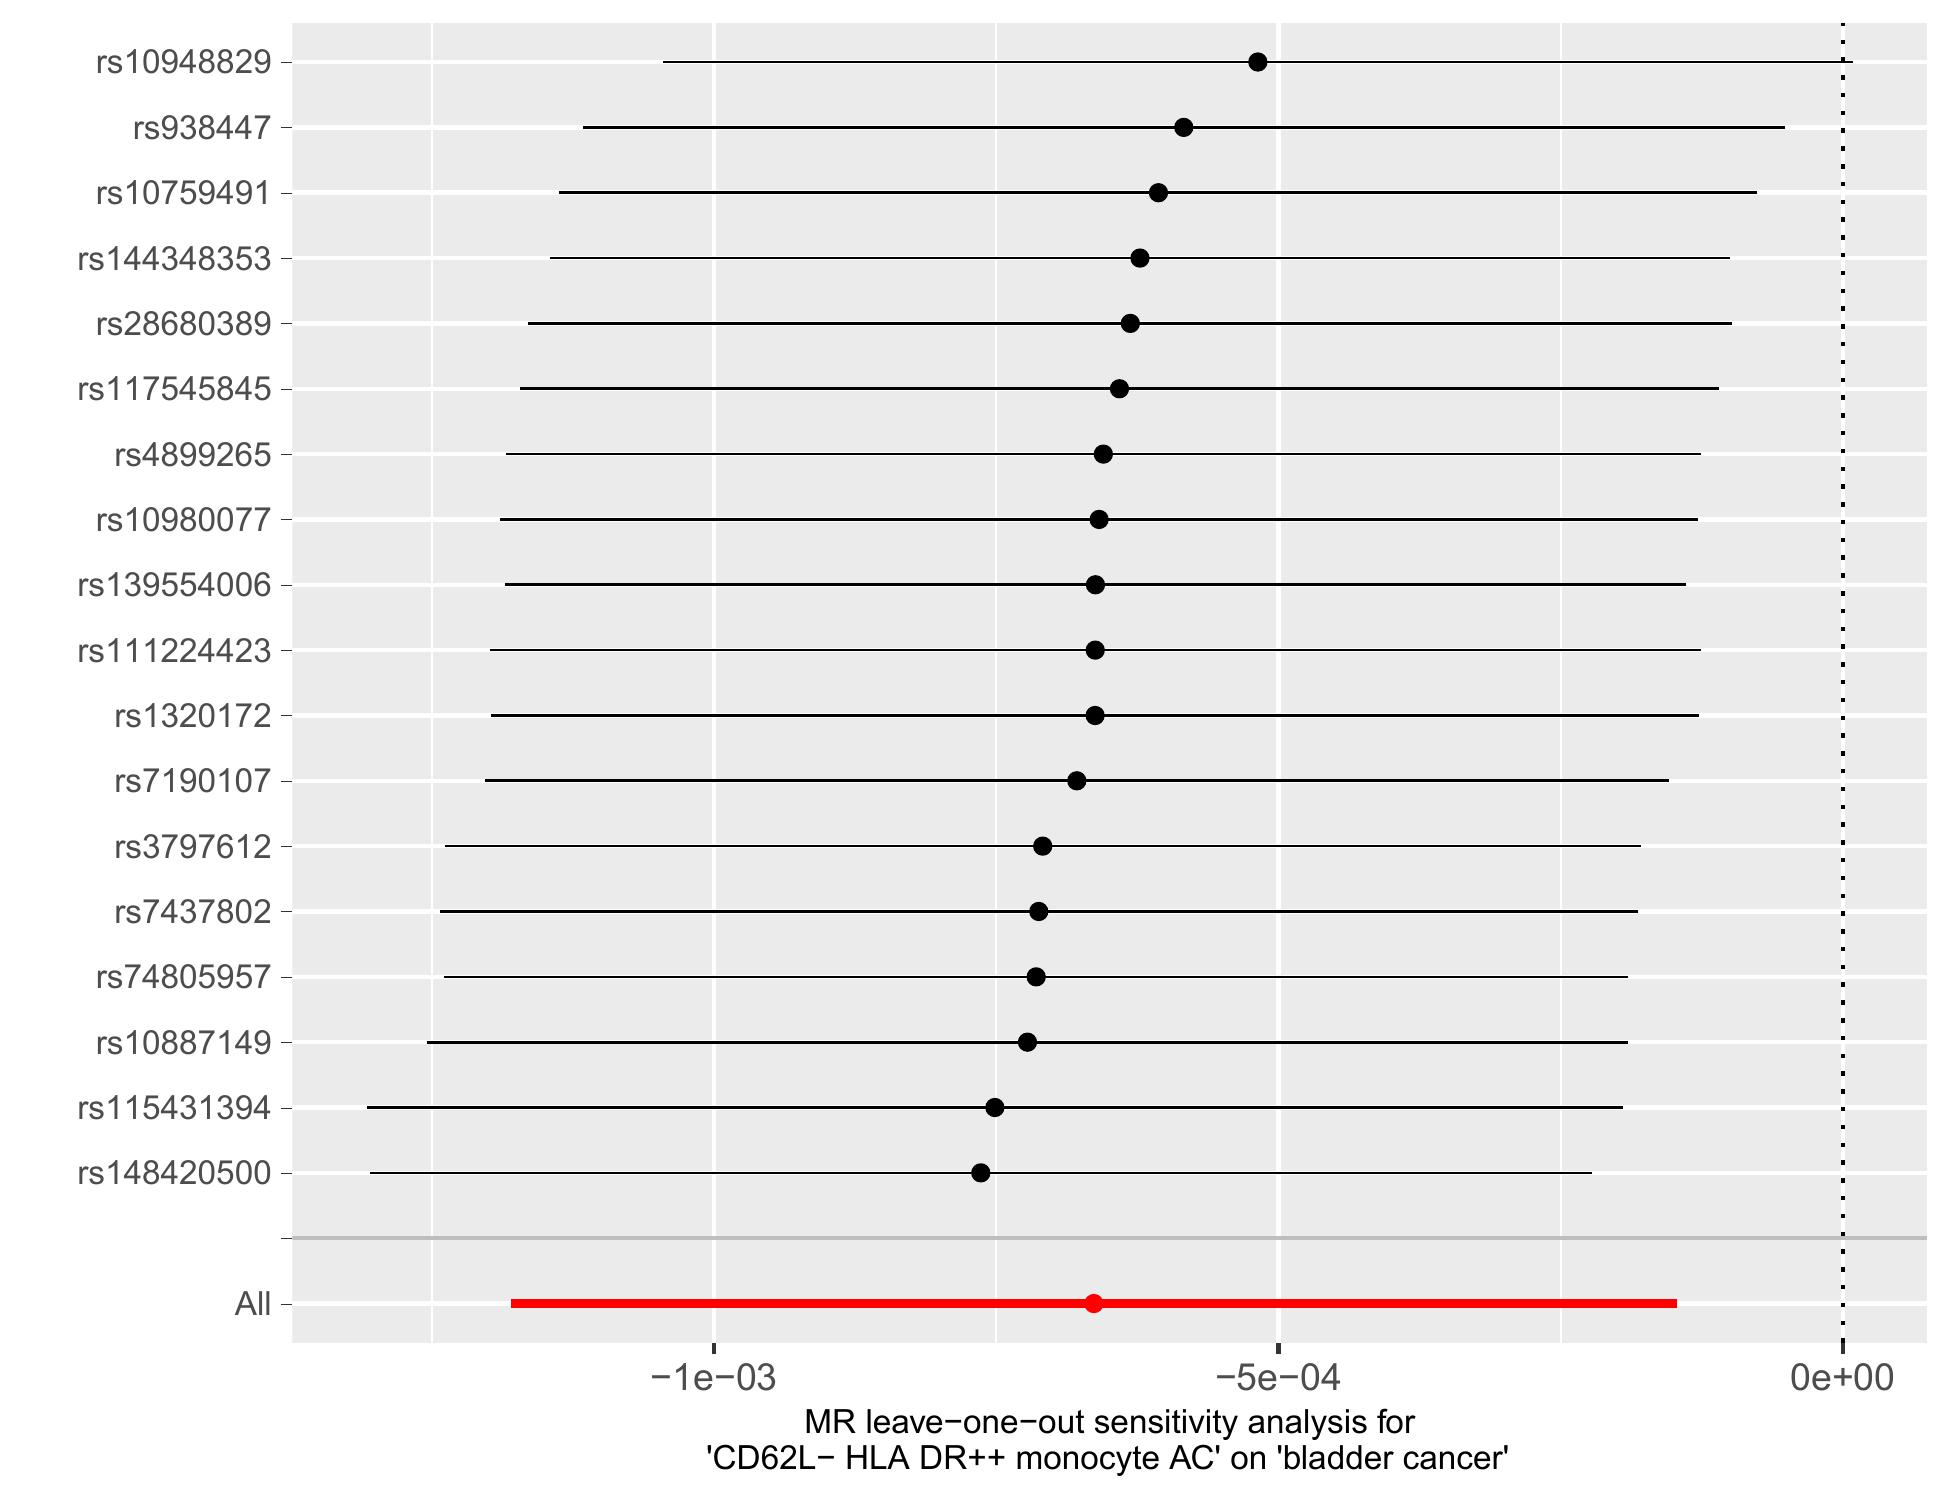

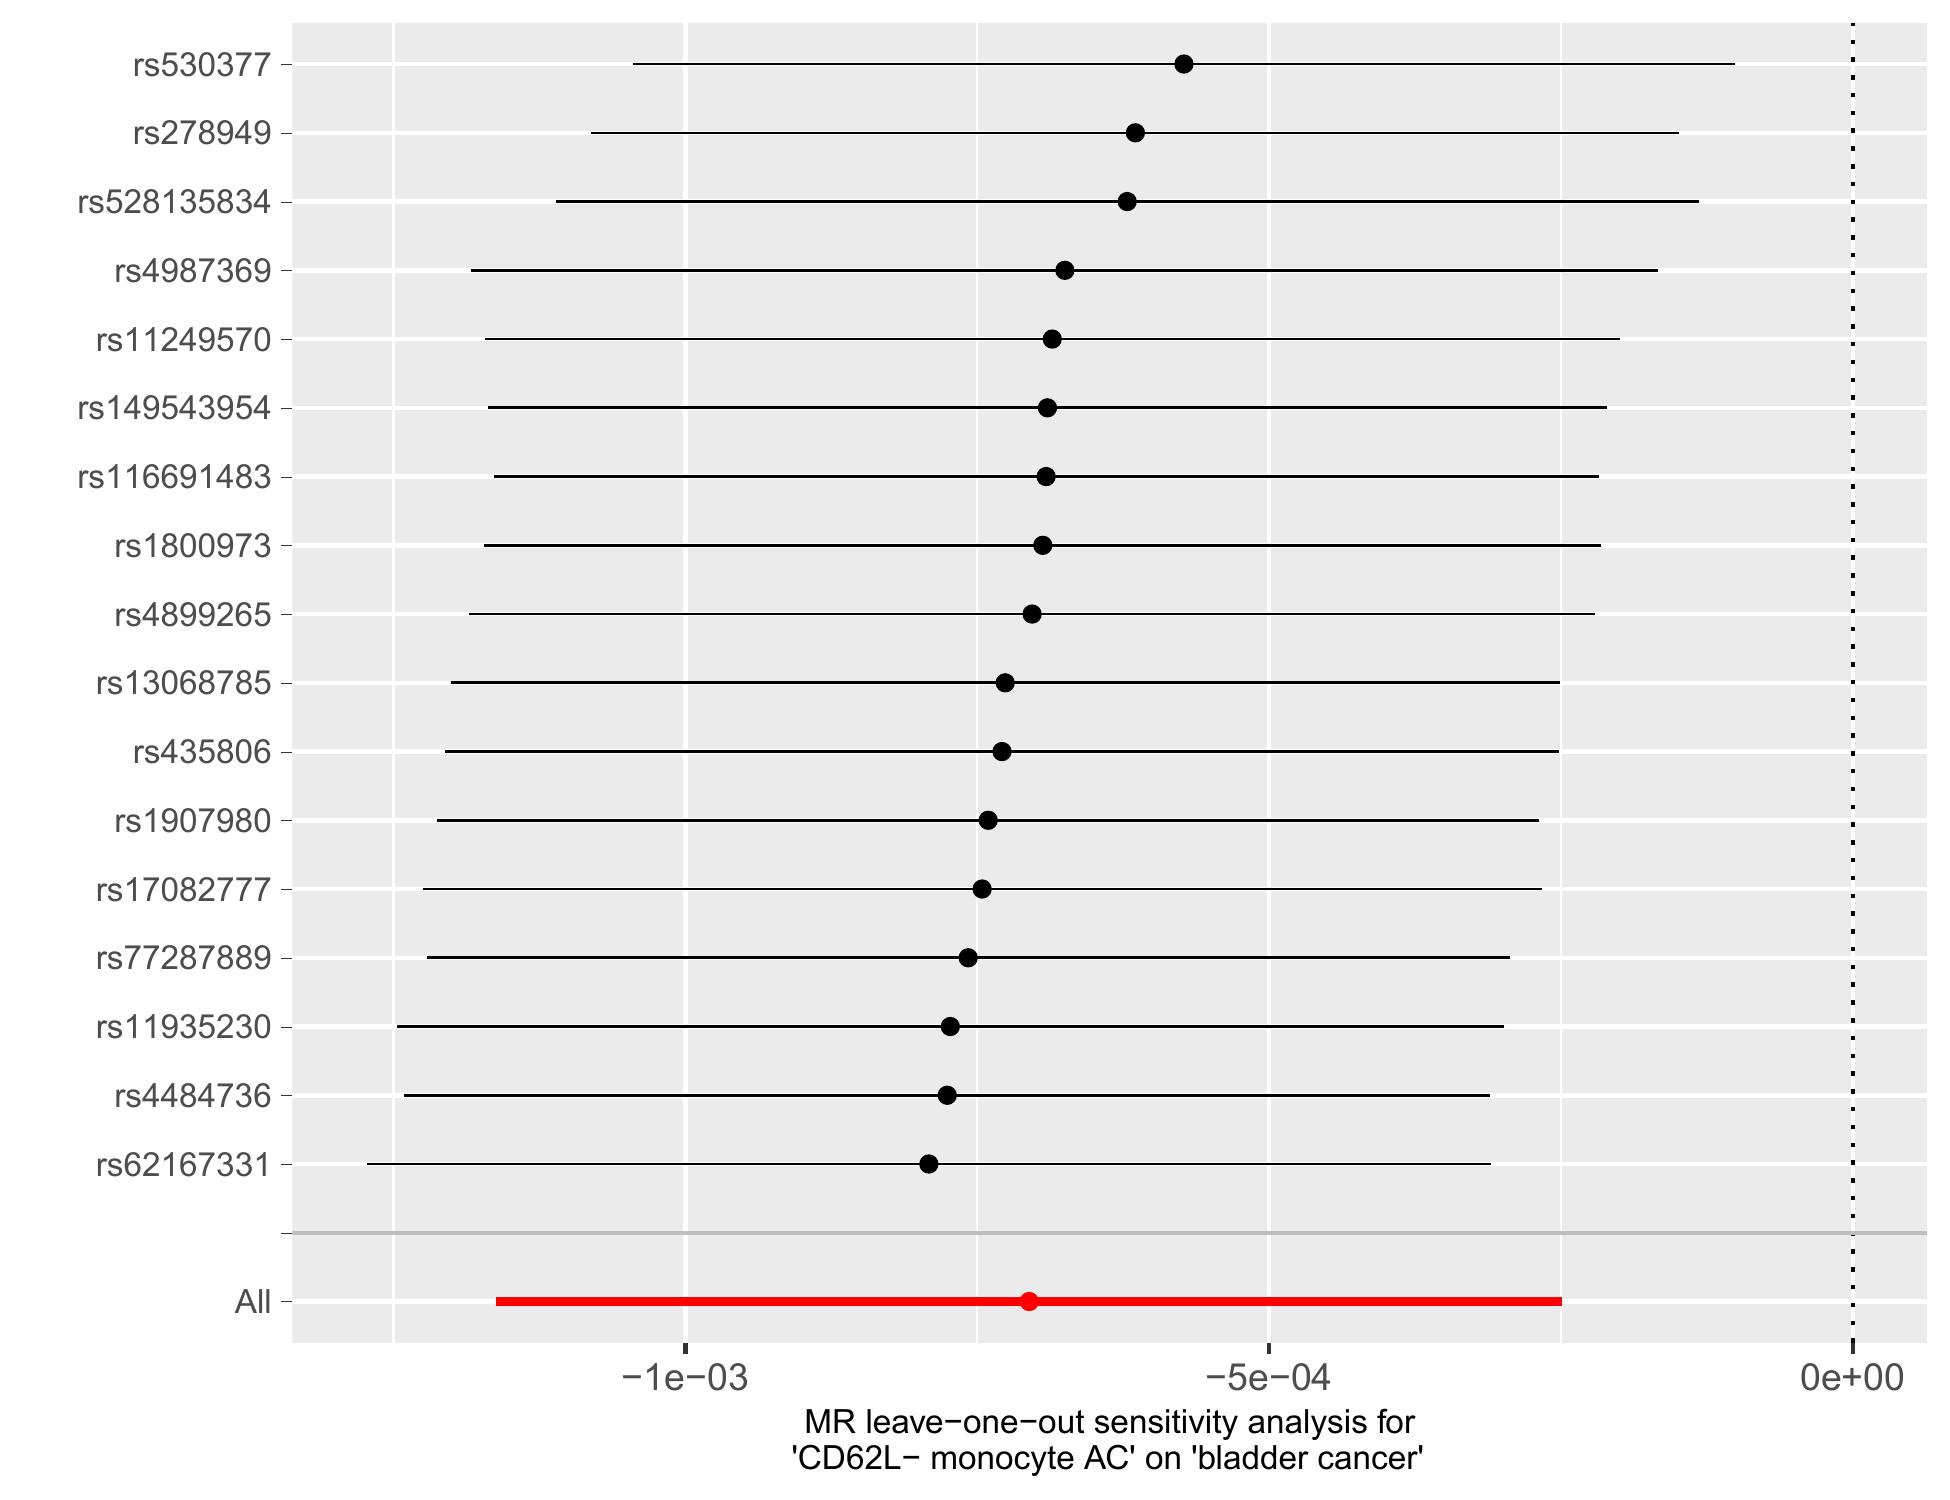

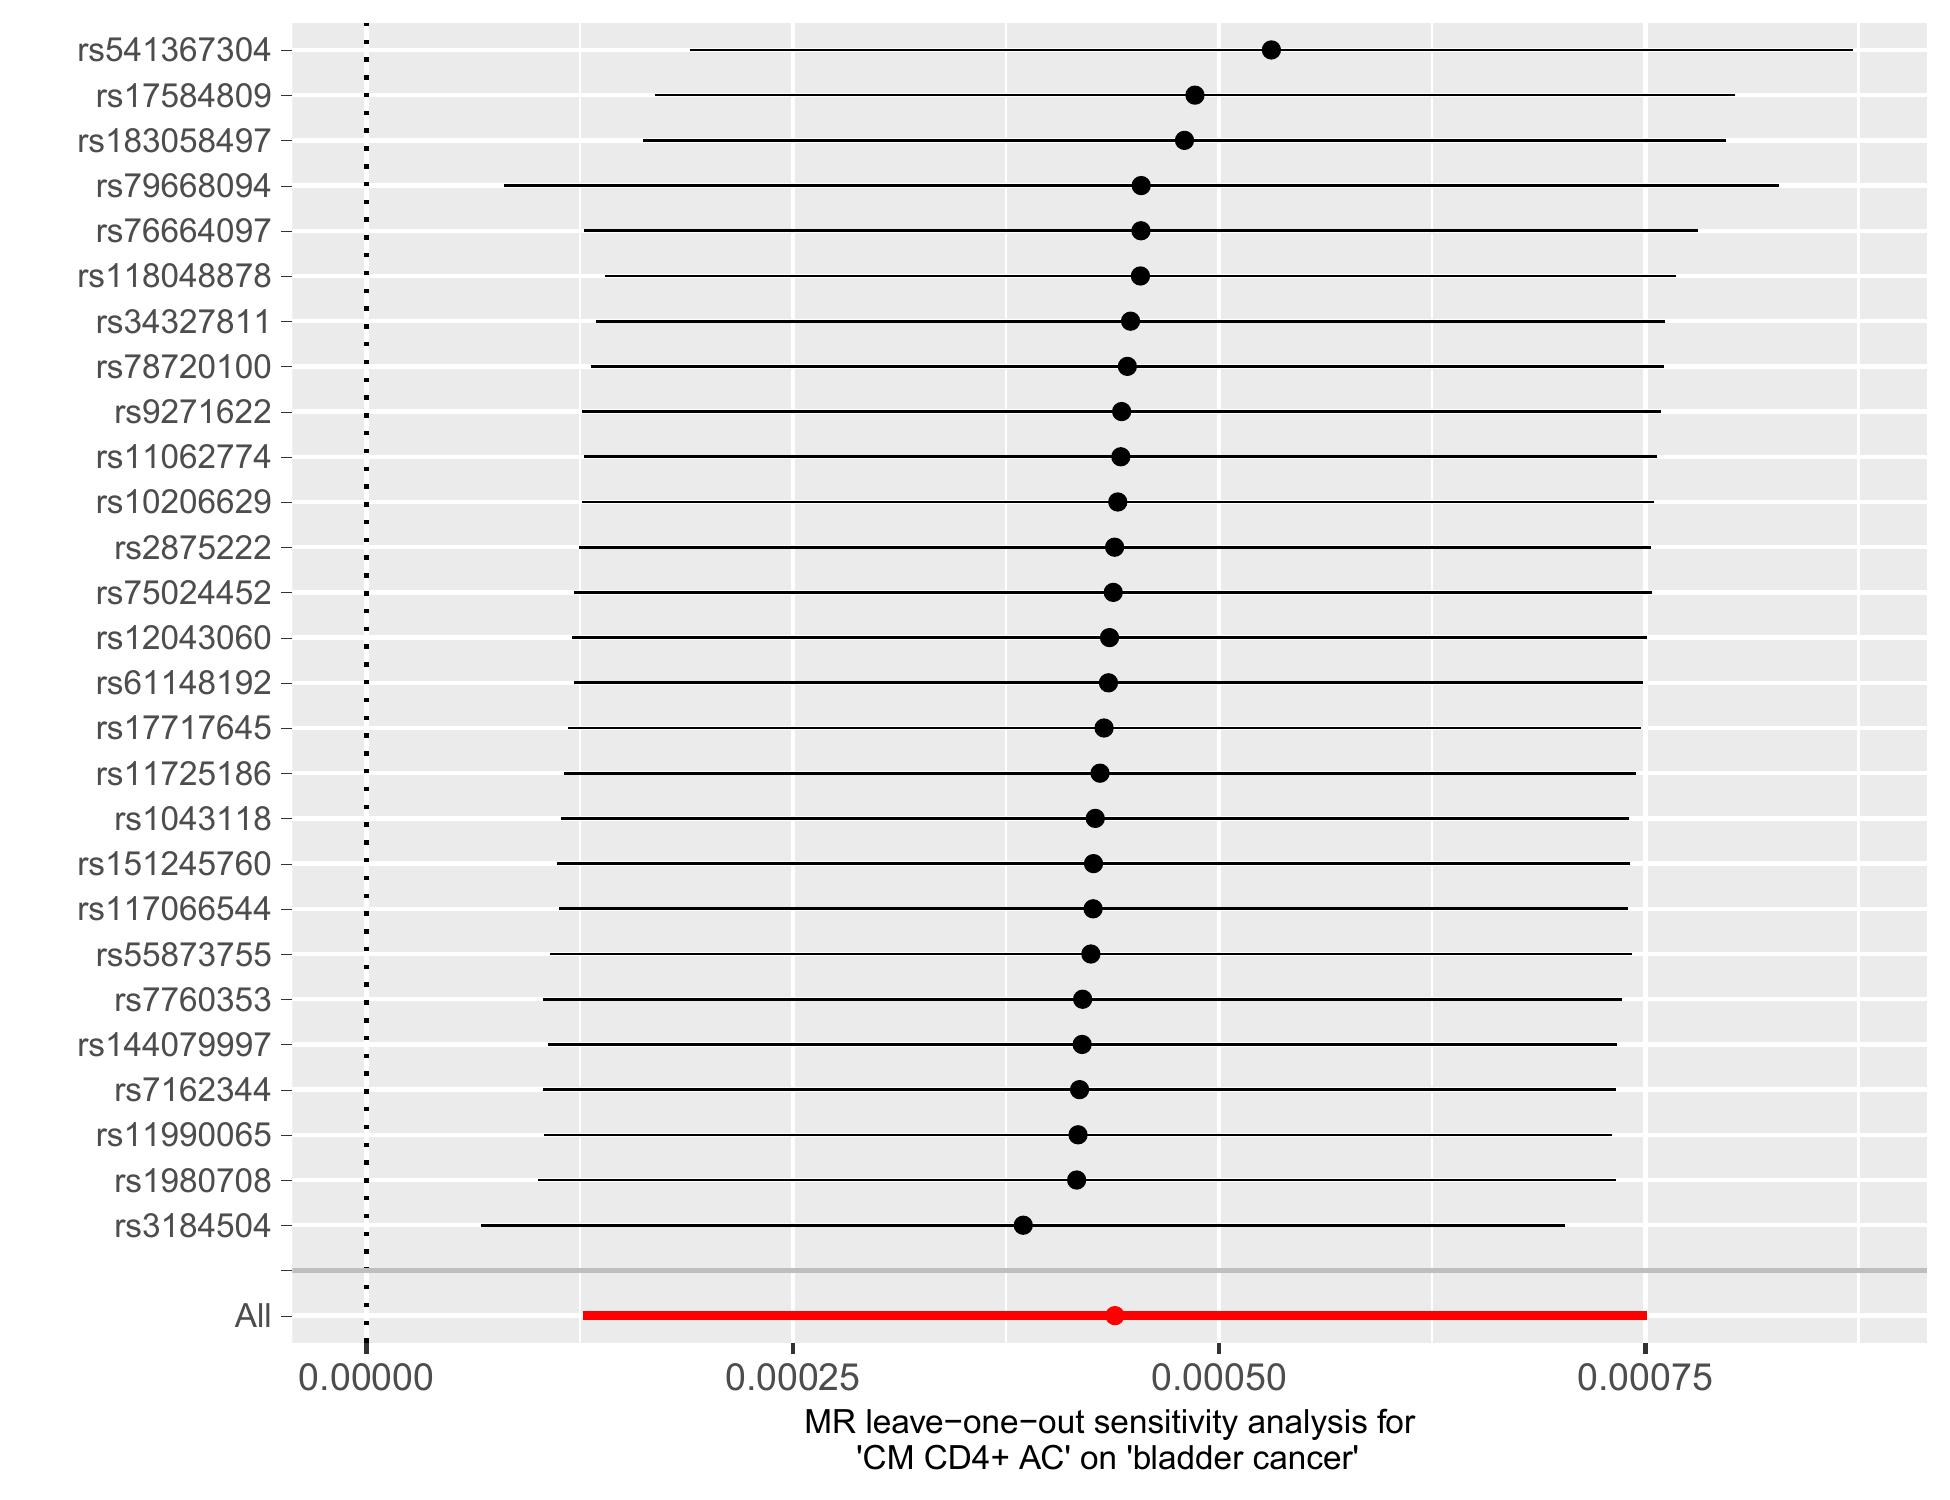

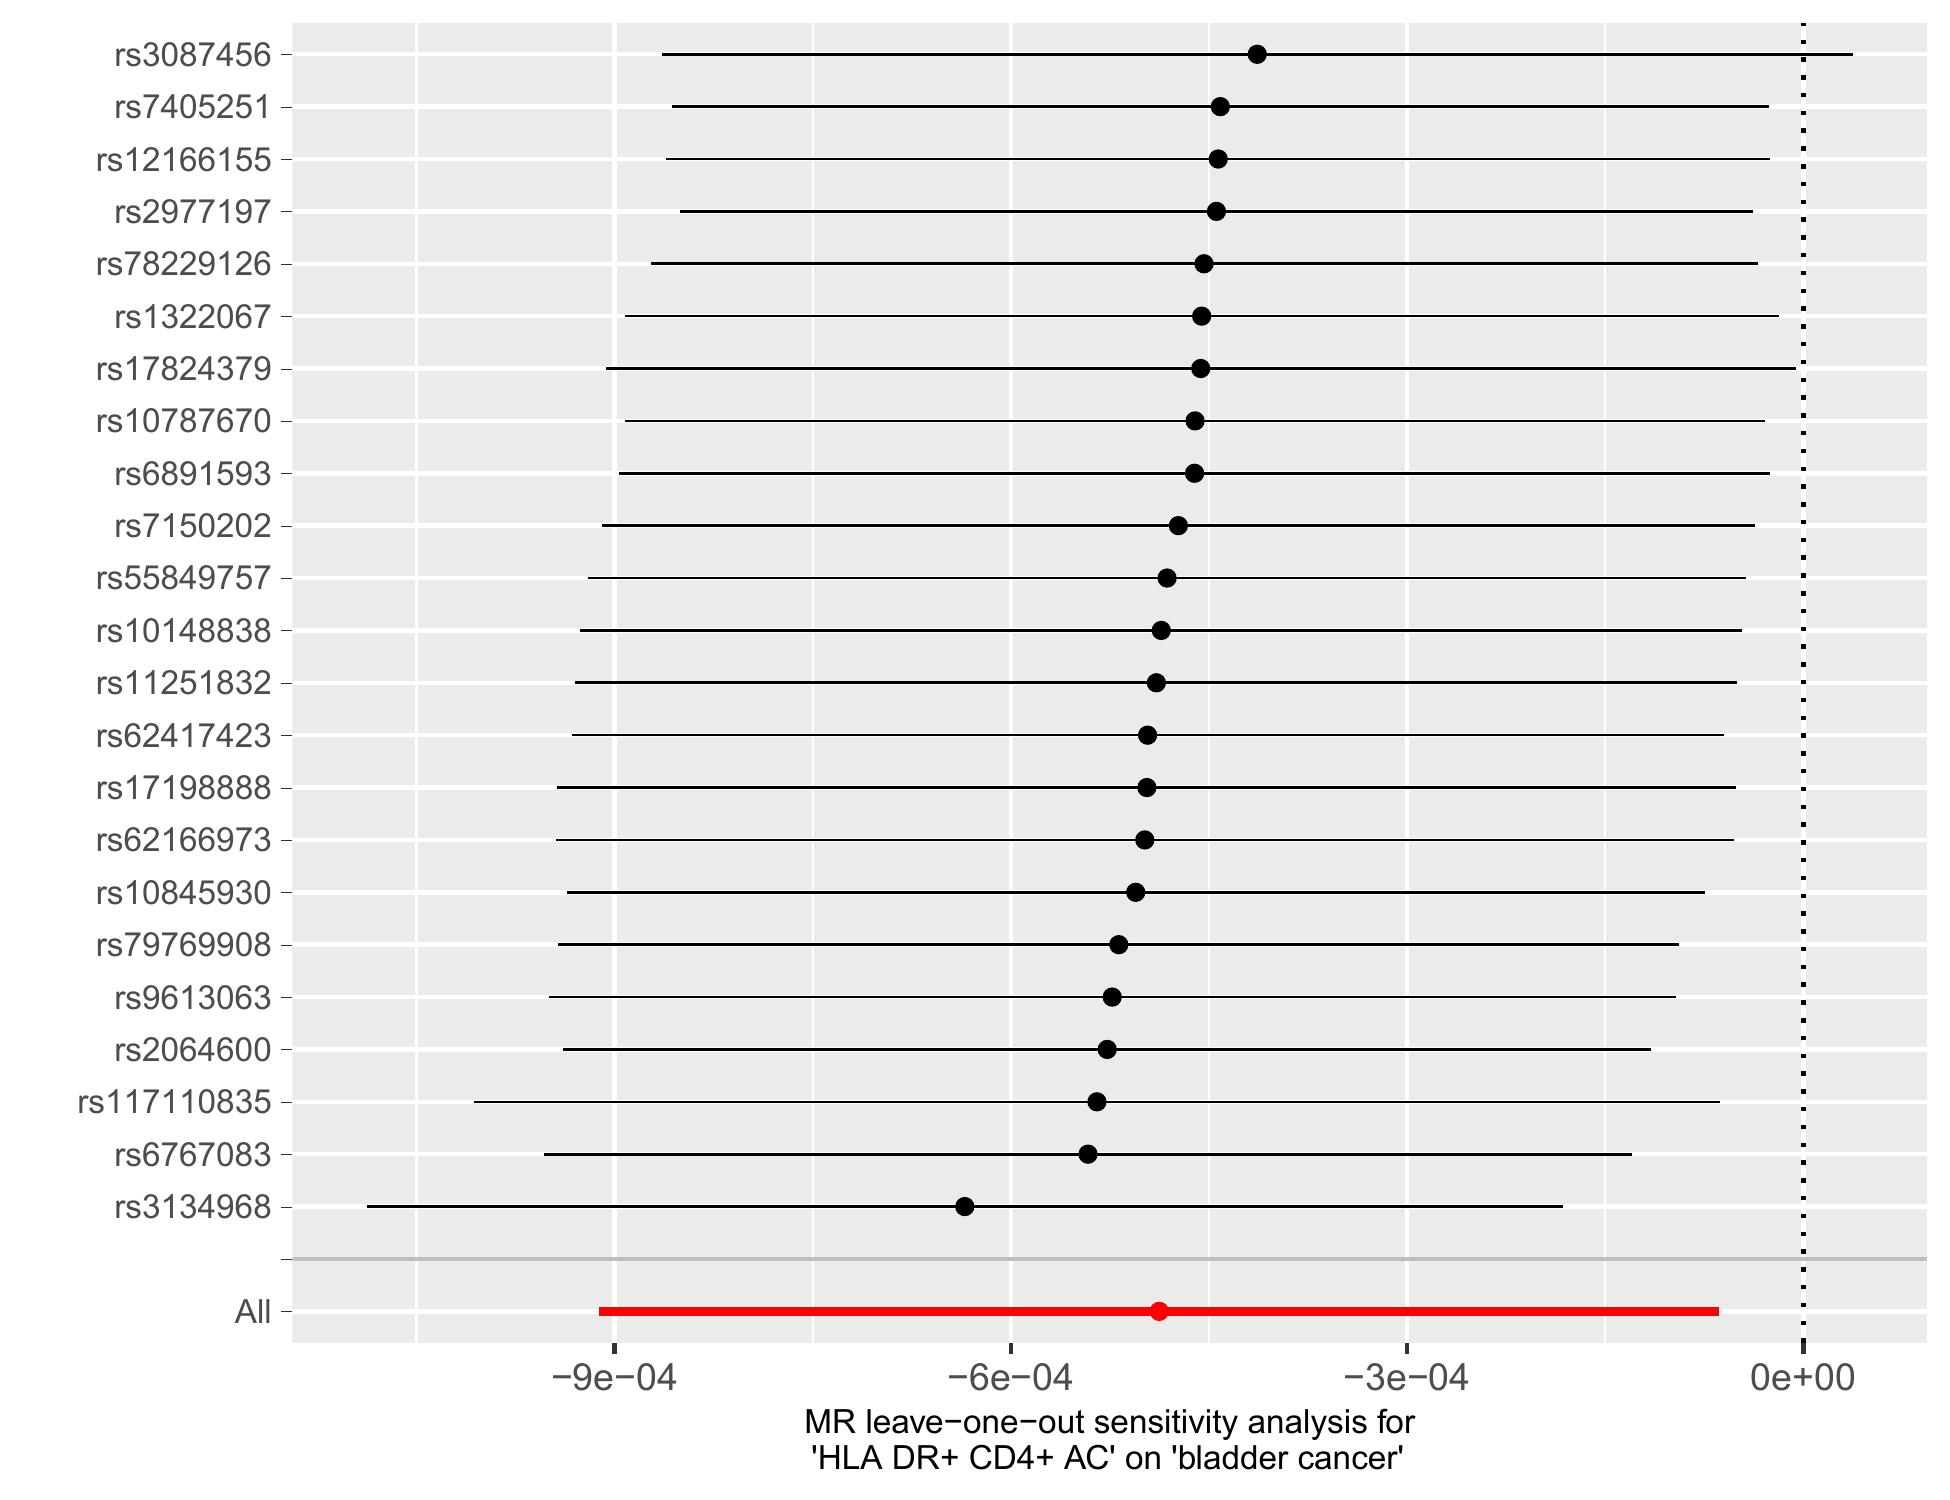

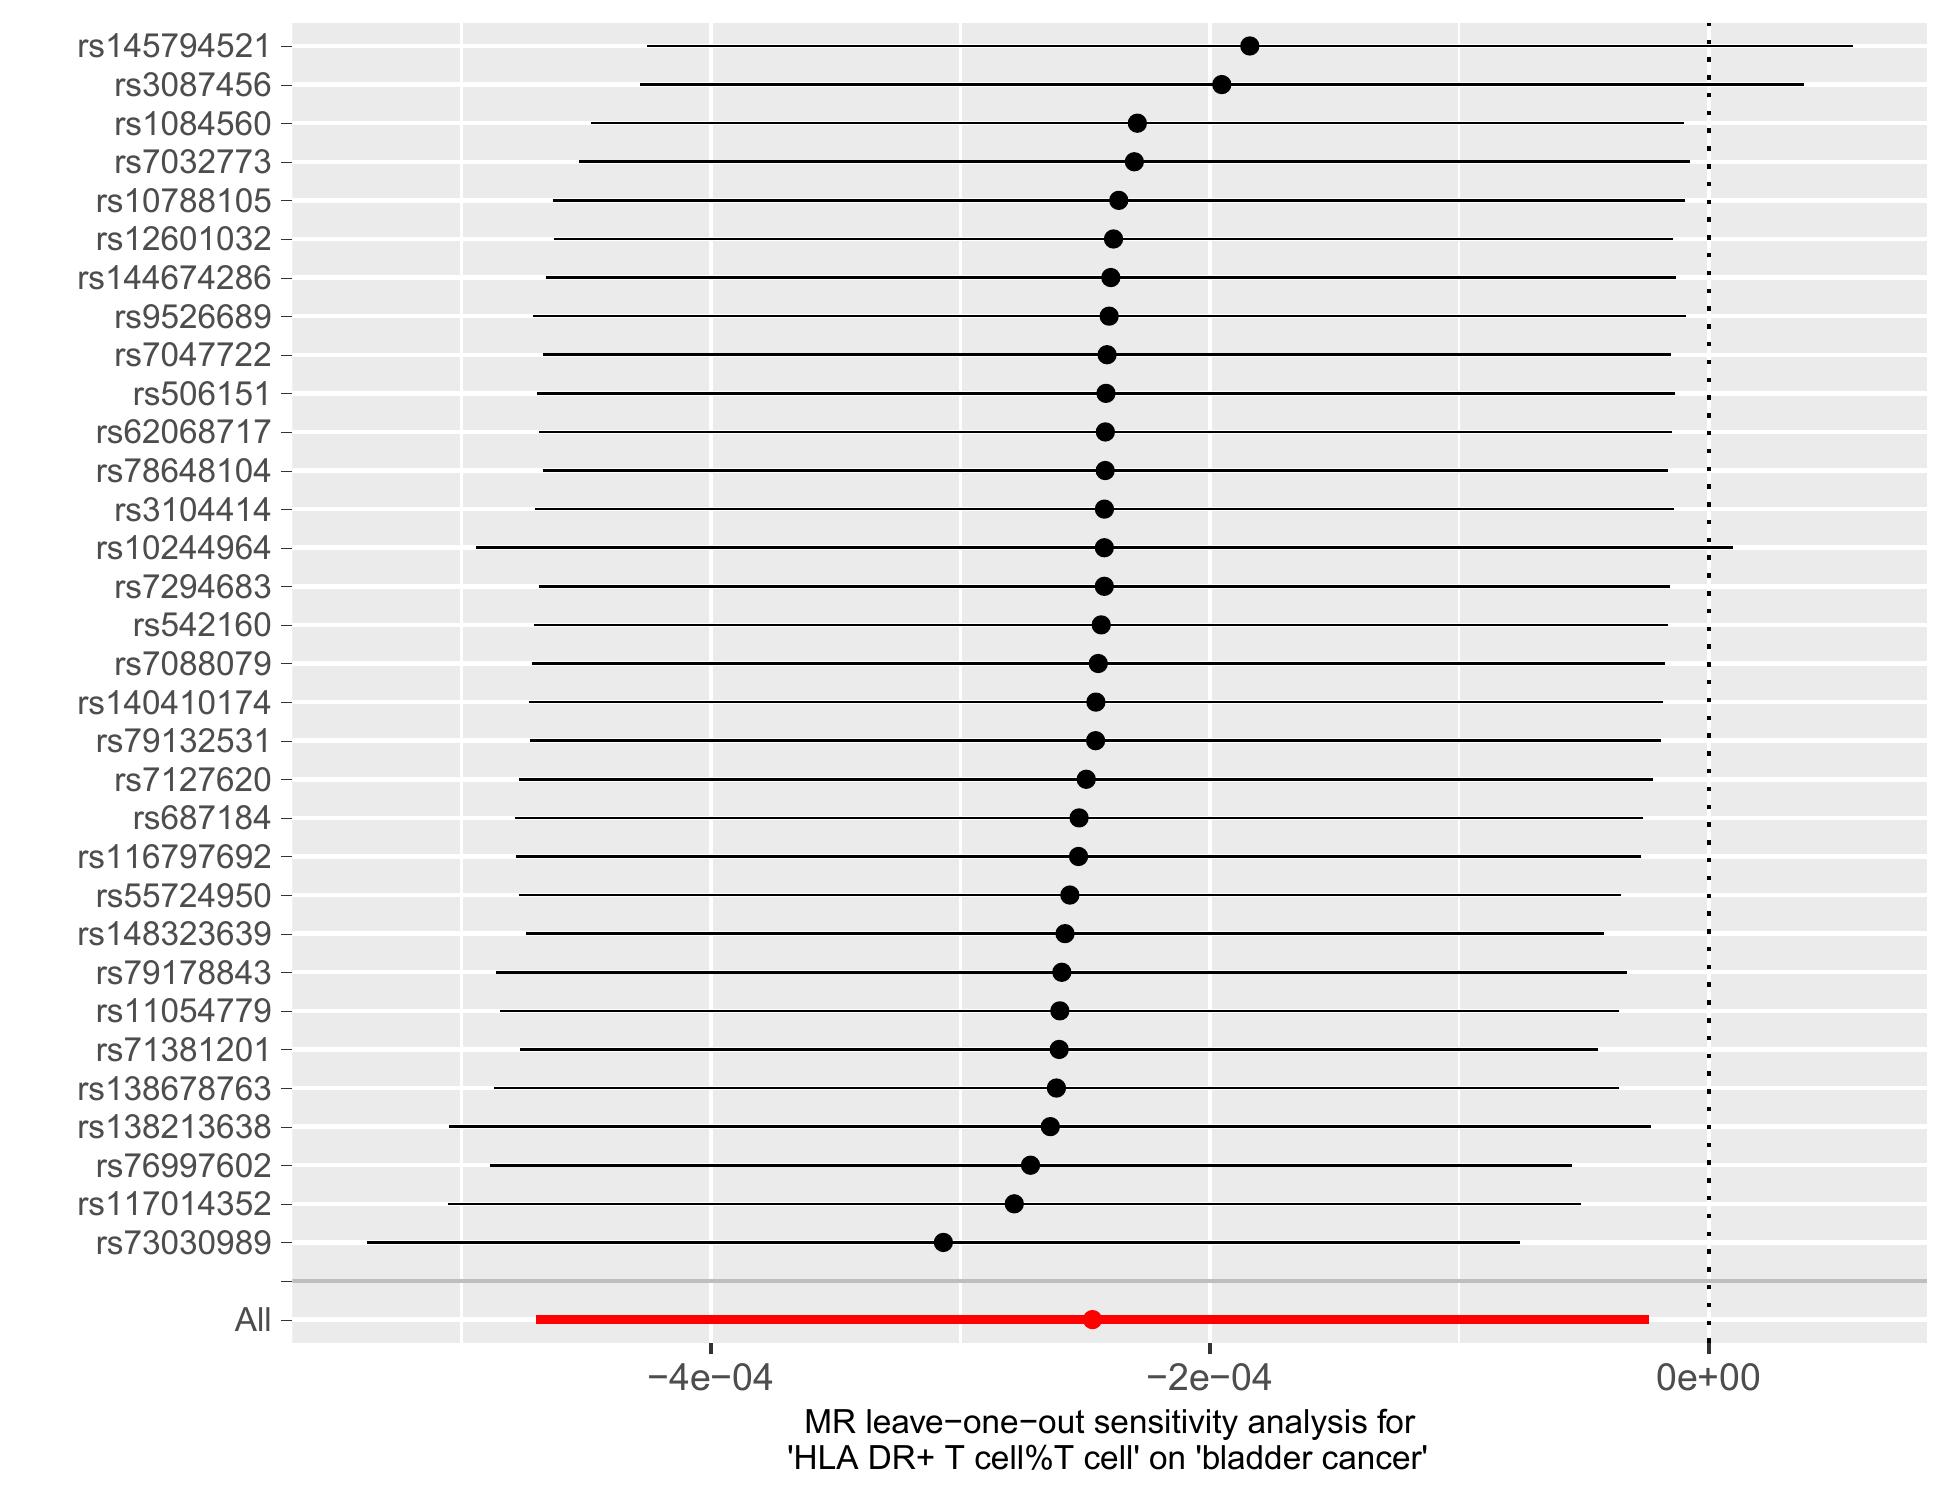

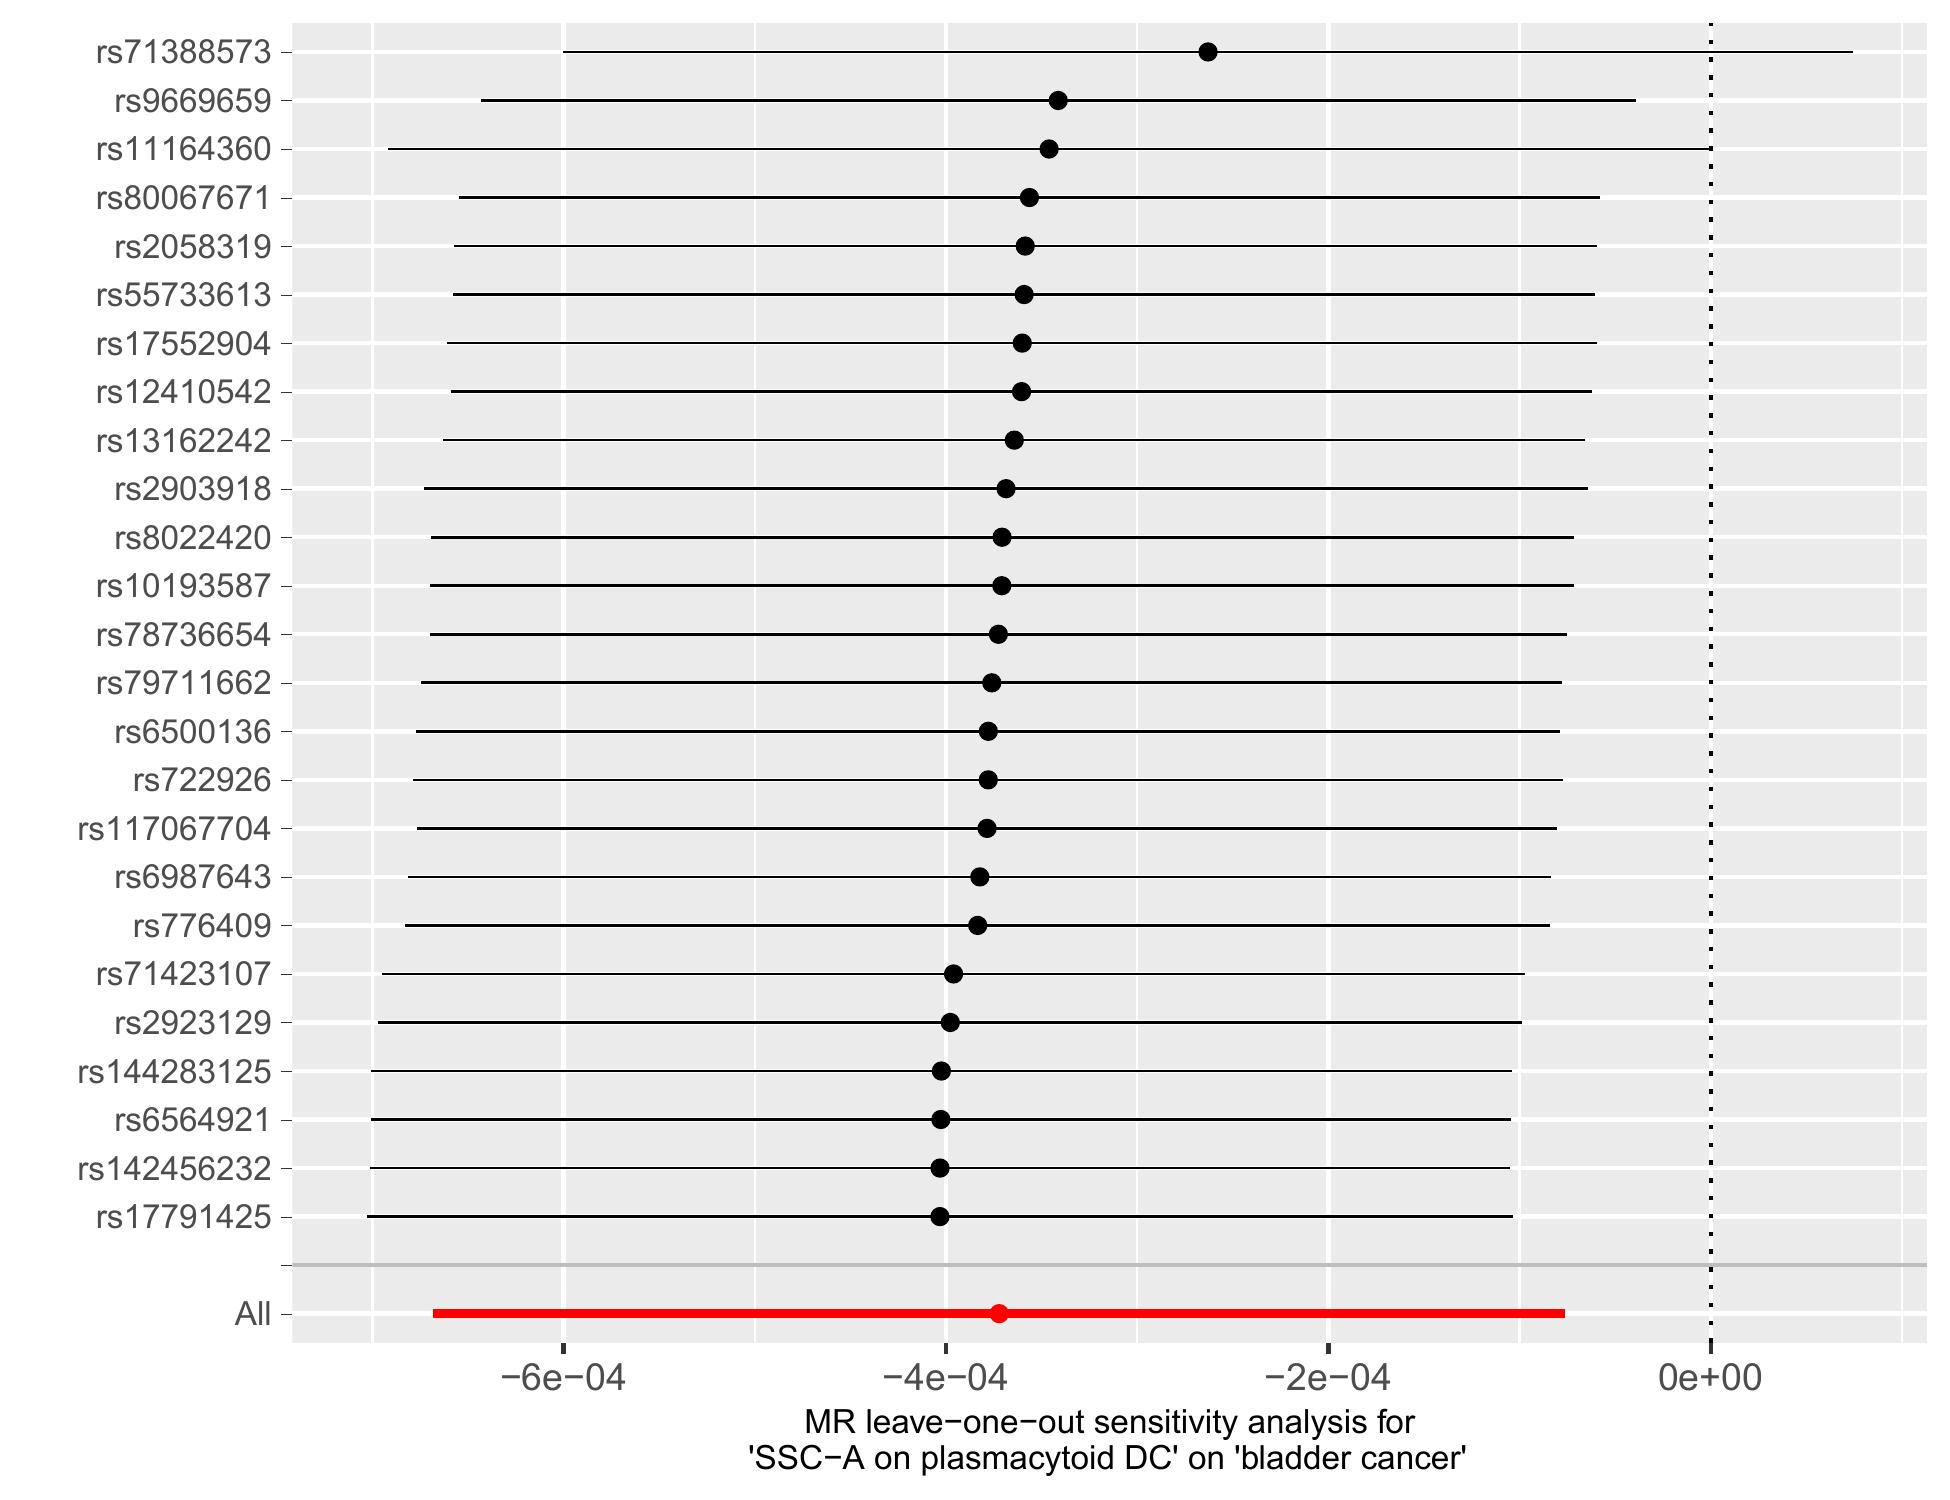
Figure 1** A leave-one-out analysis of 16 immune cells and bladder cancer

Supplement: Supplementary file 2 [file 4613575114cc2c280424f48d.docx]

**
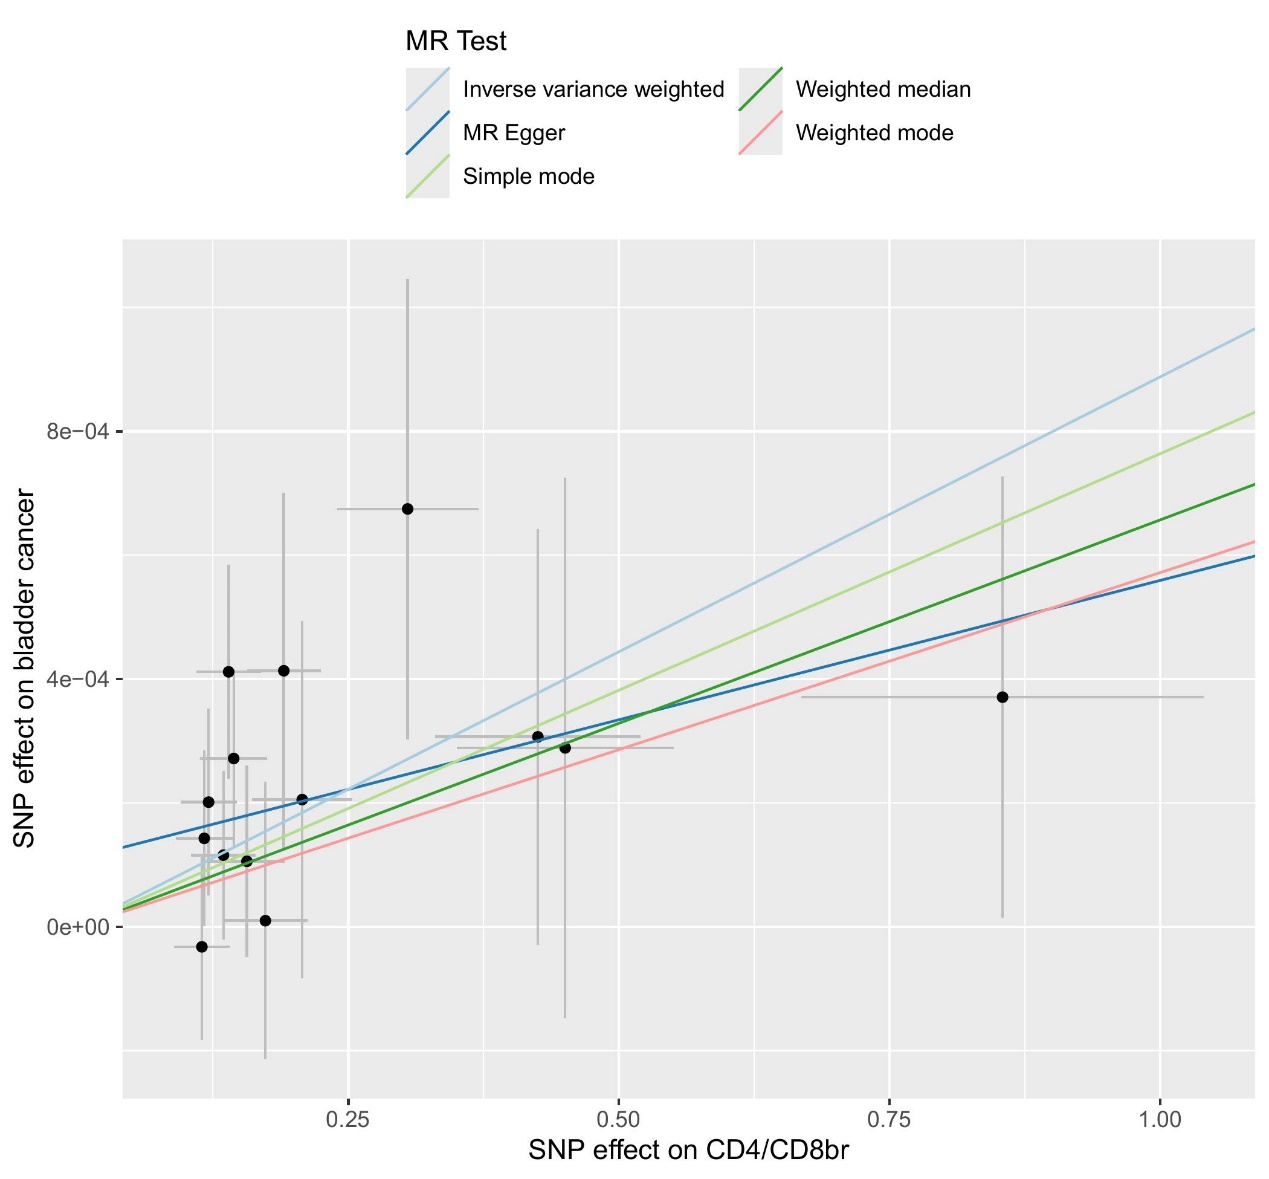

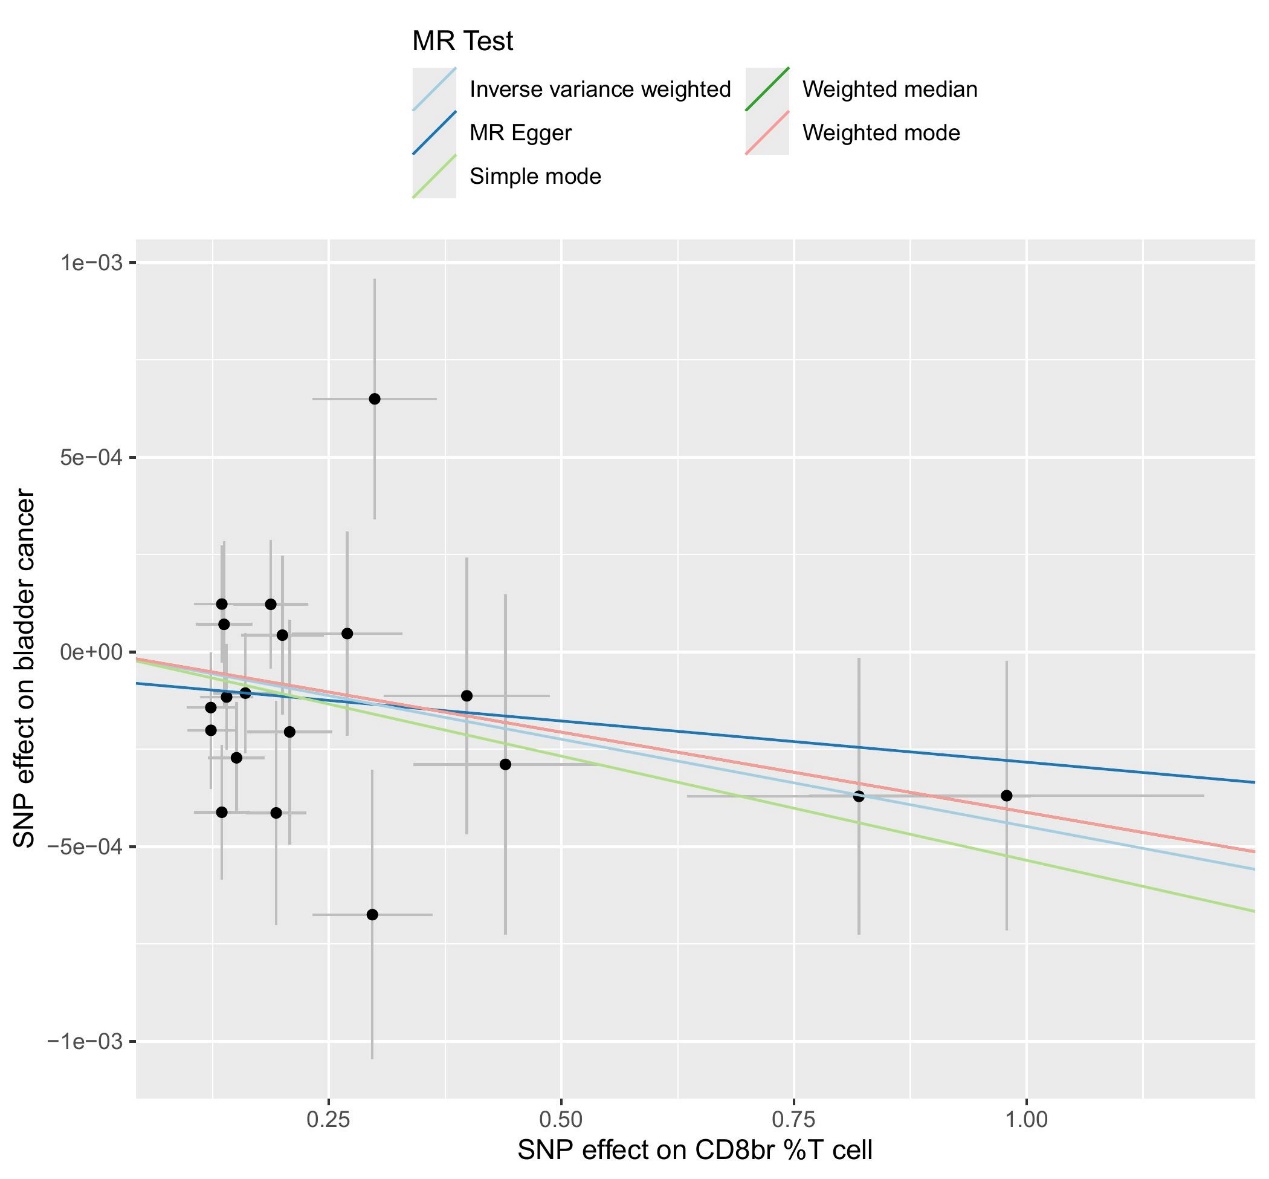

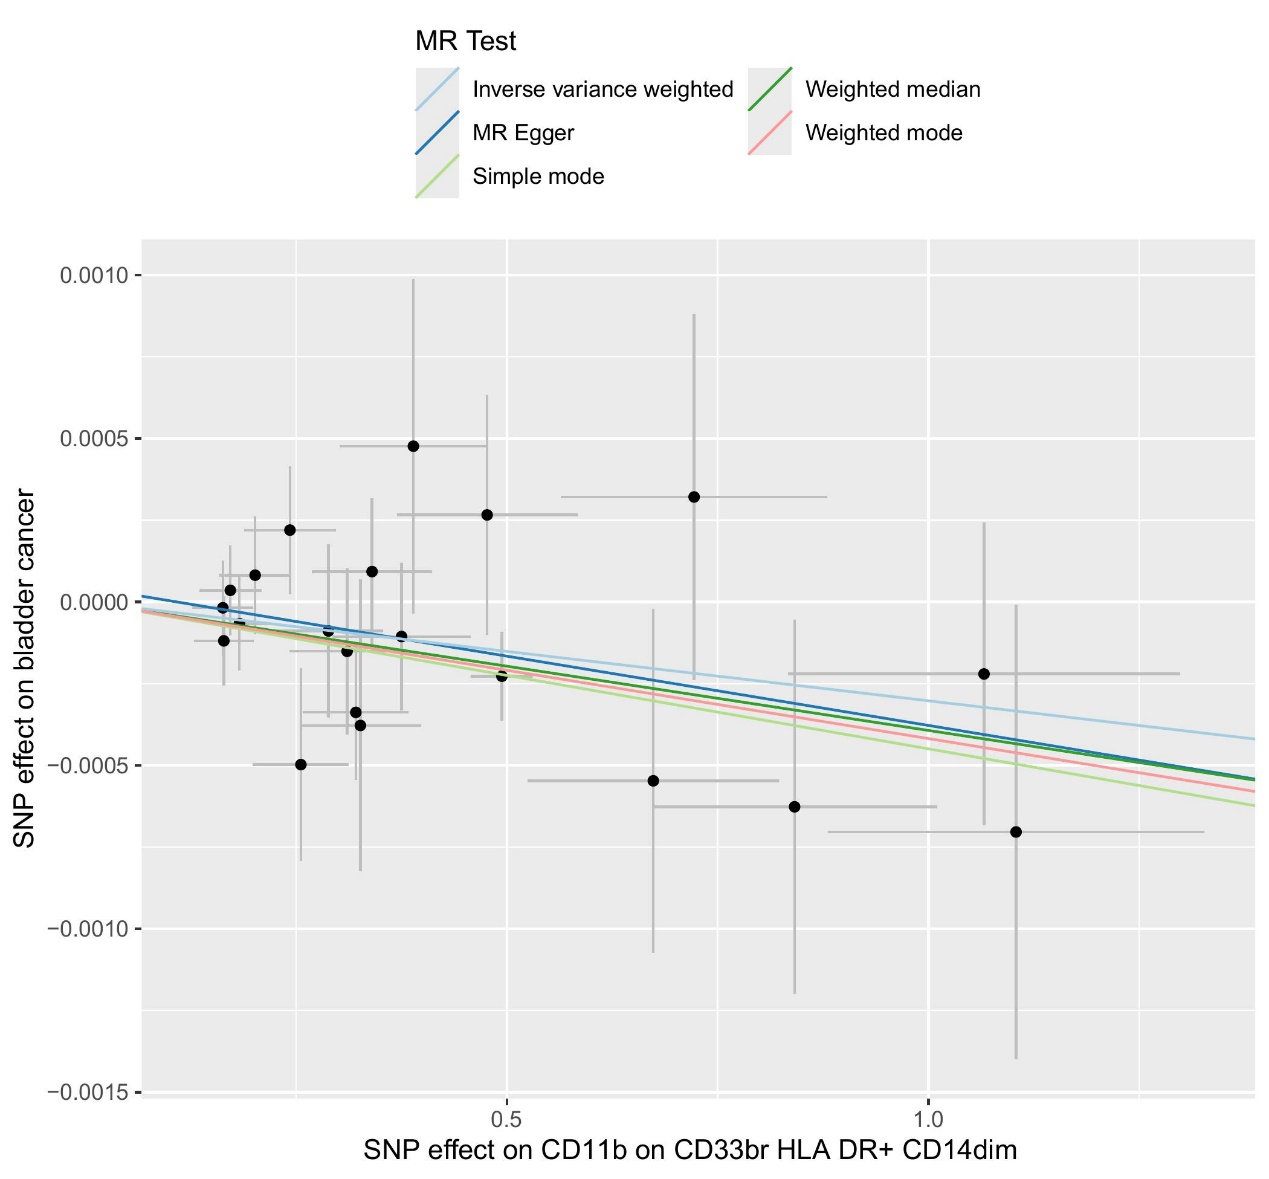

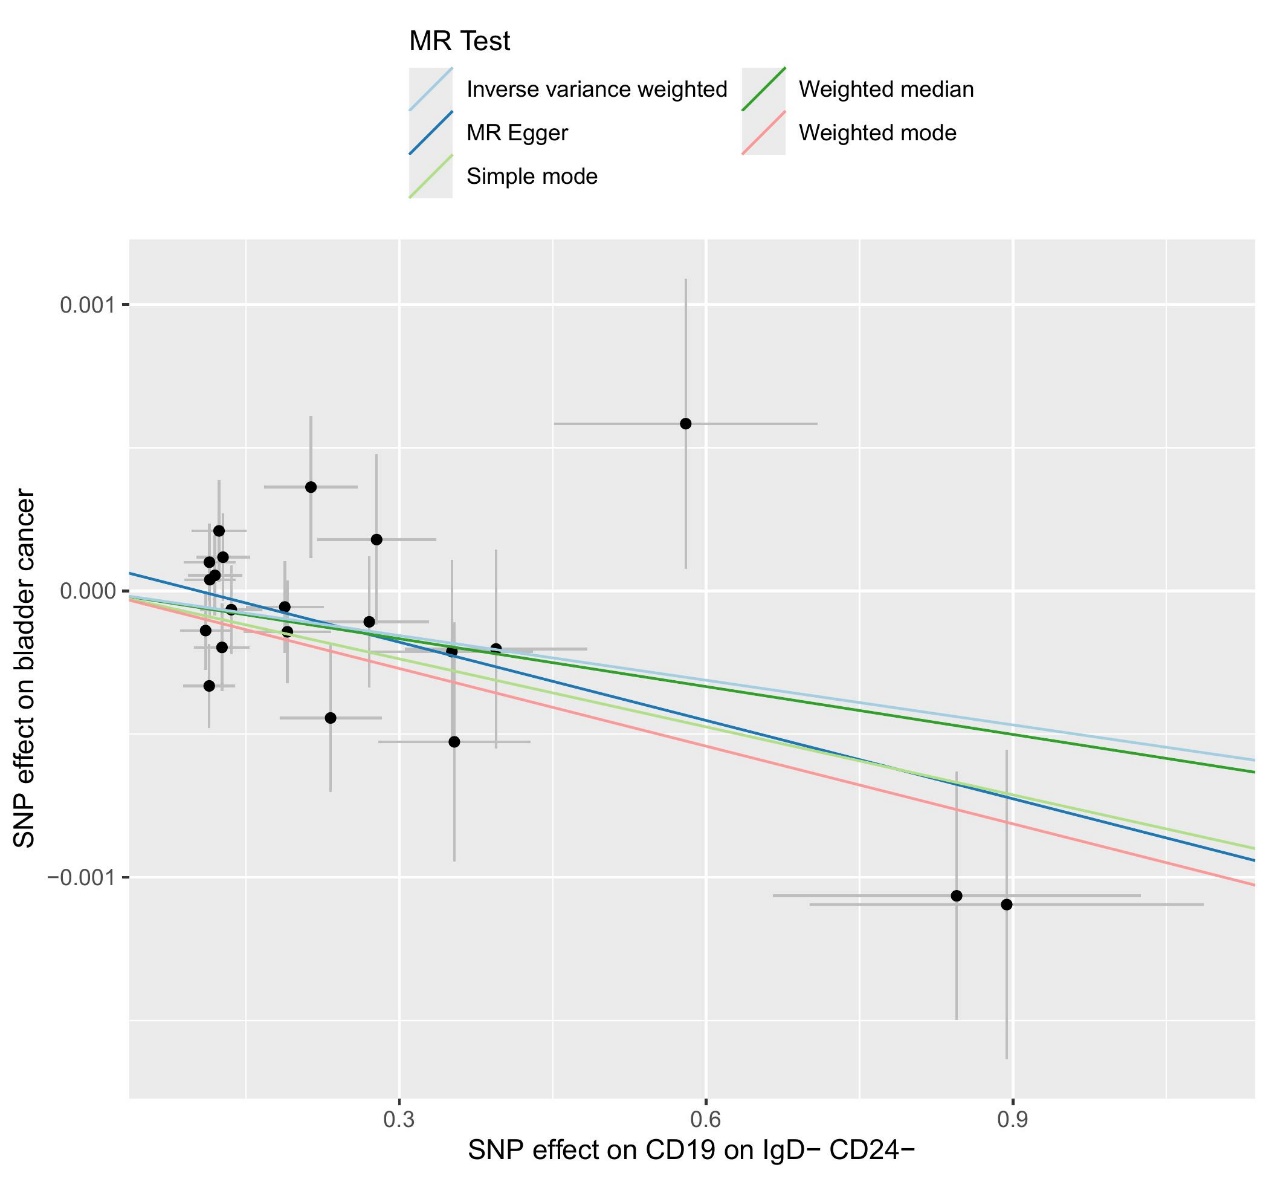

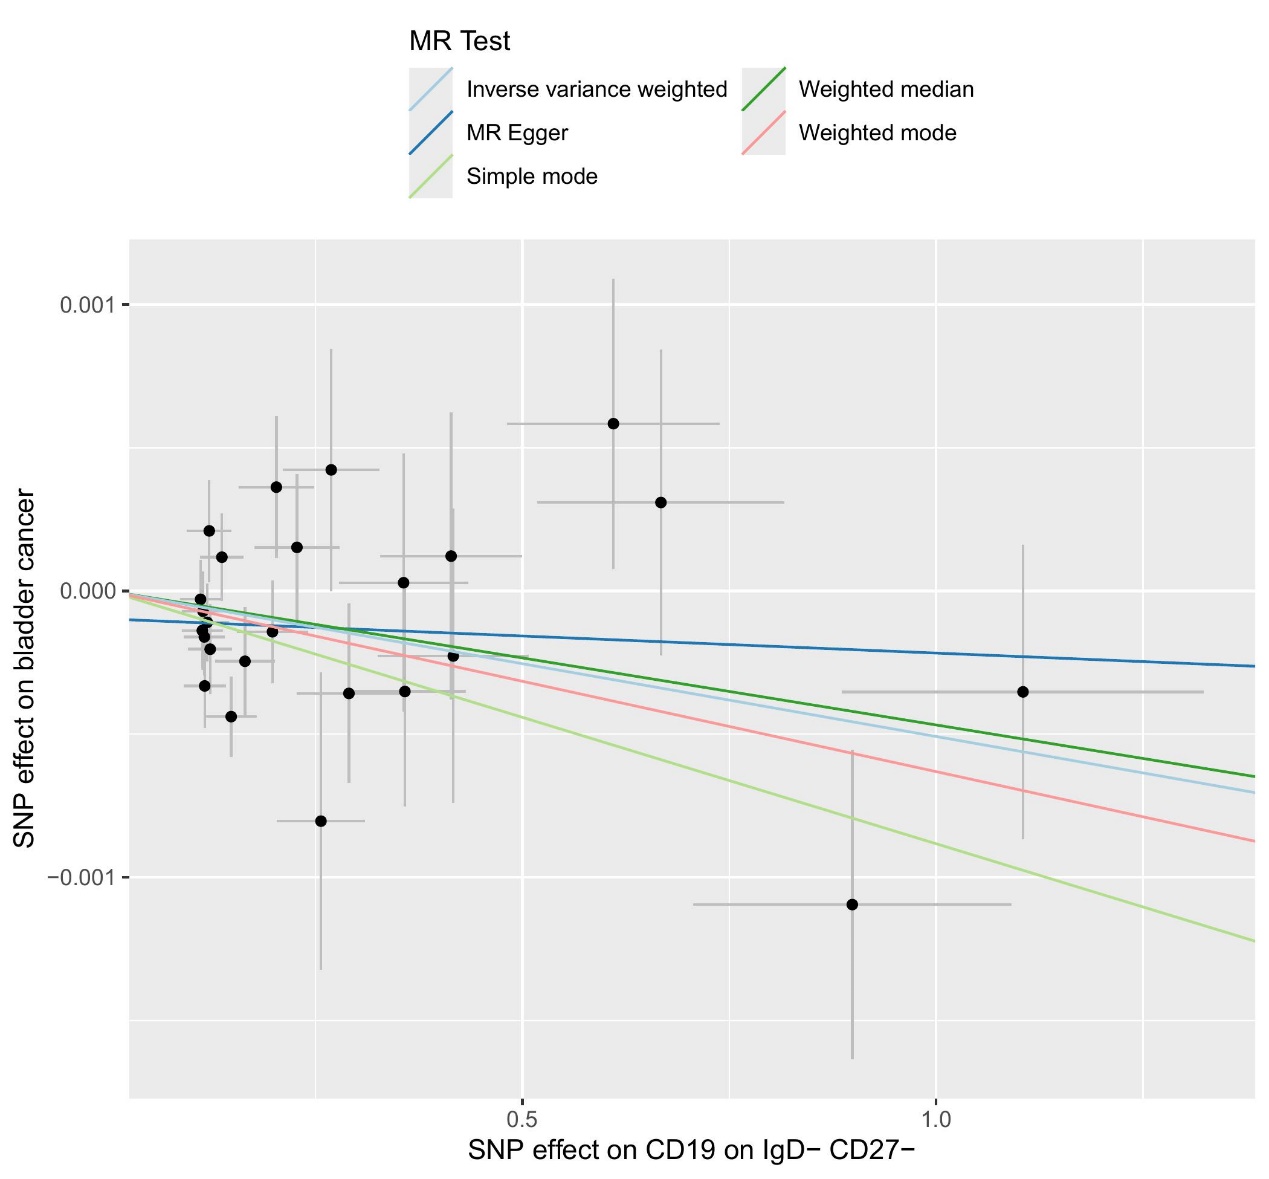

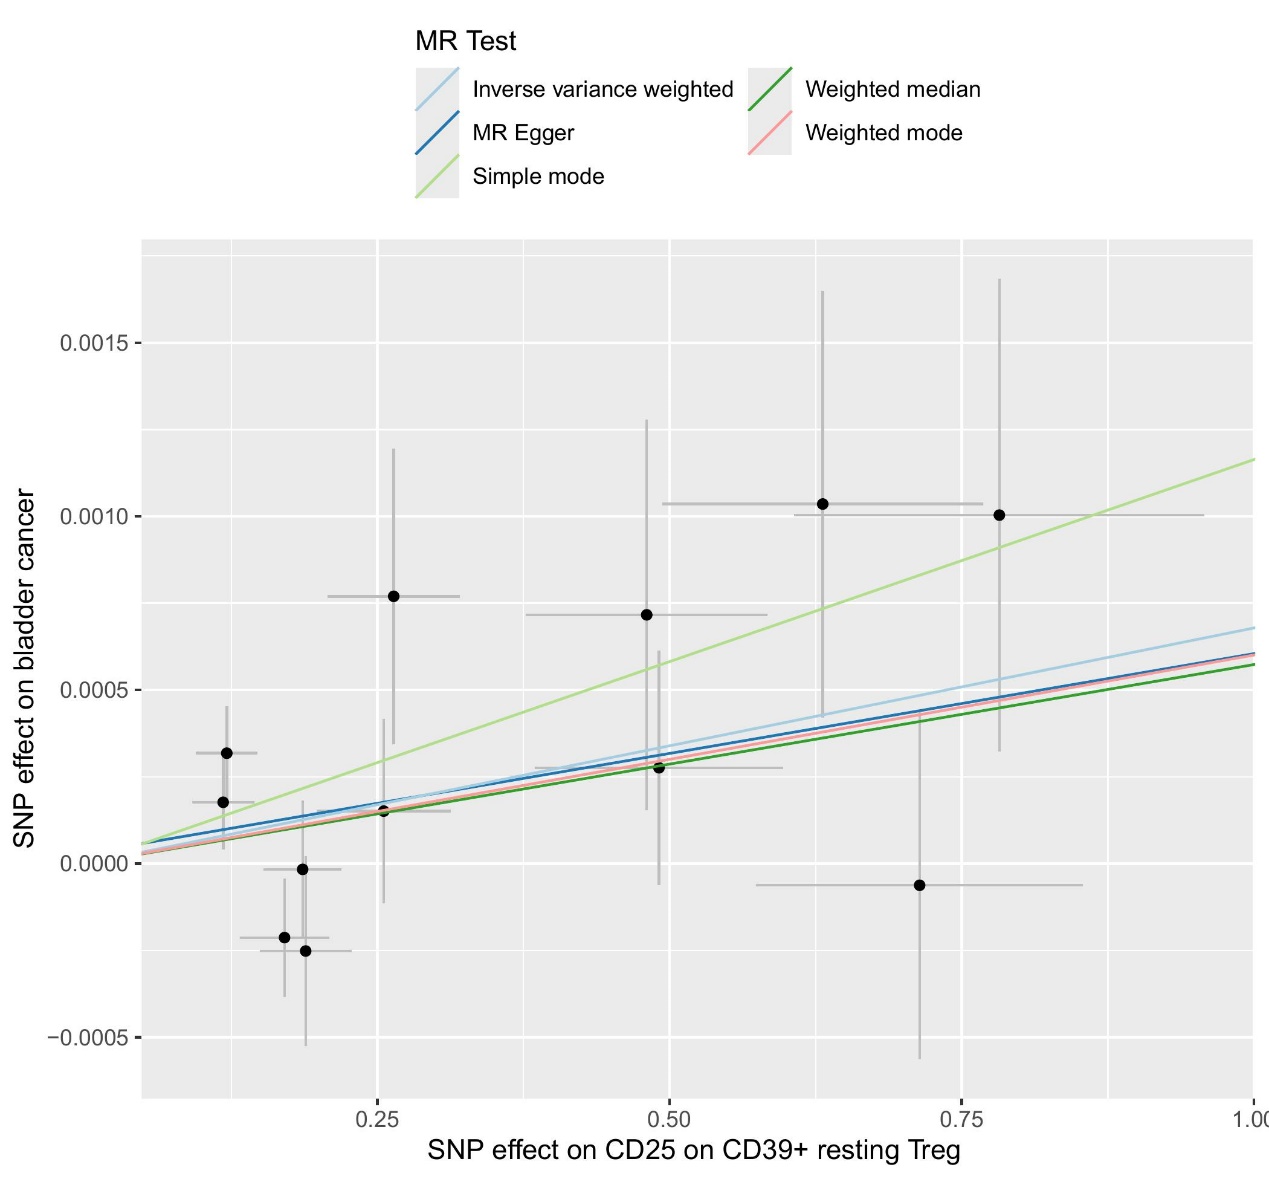

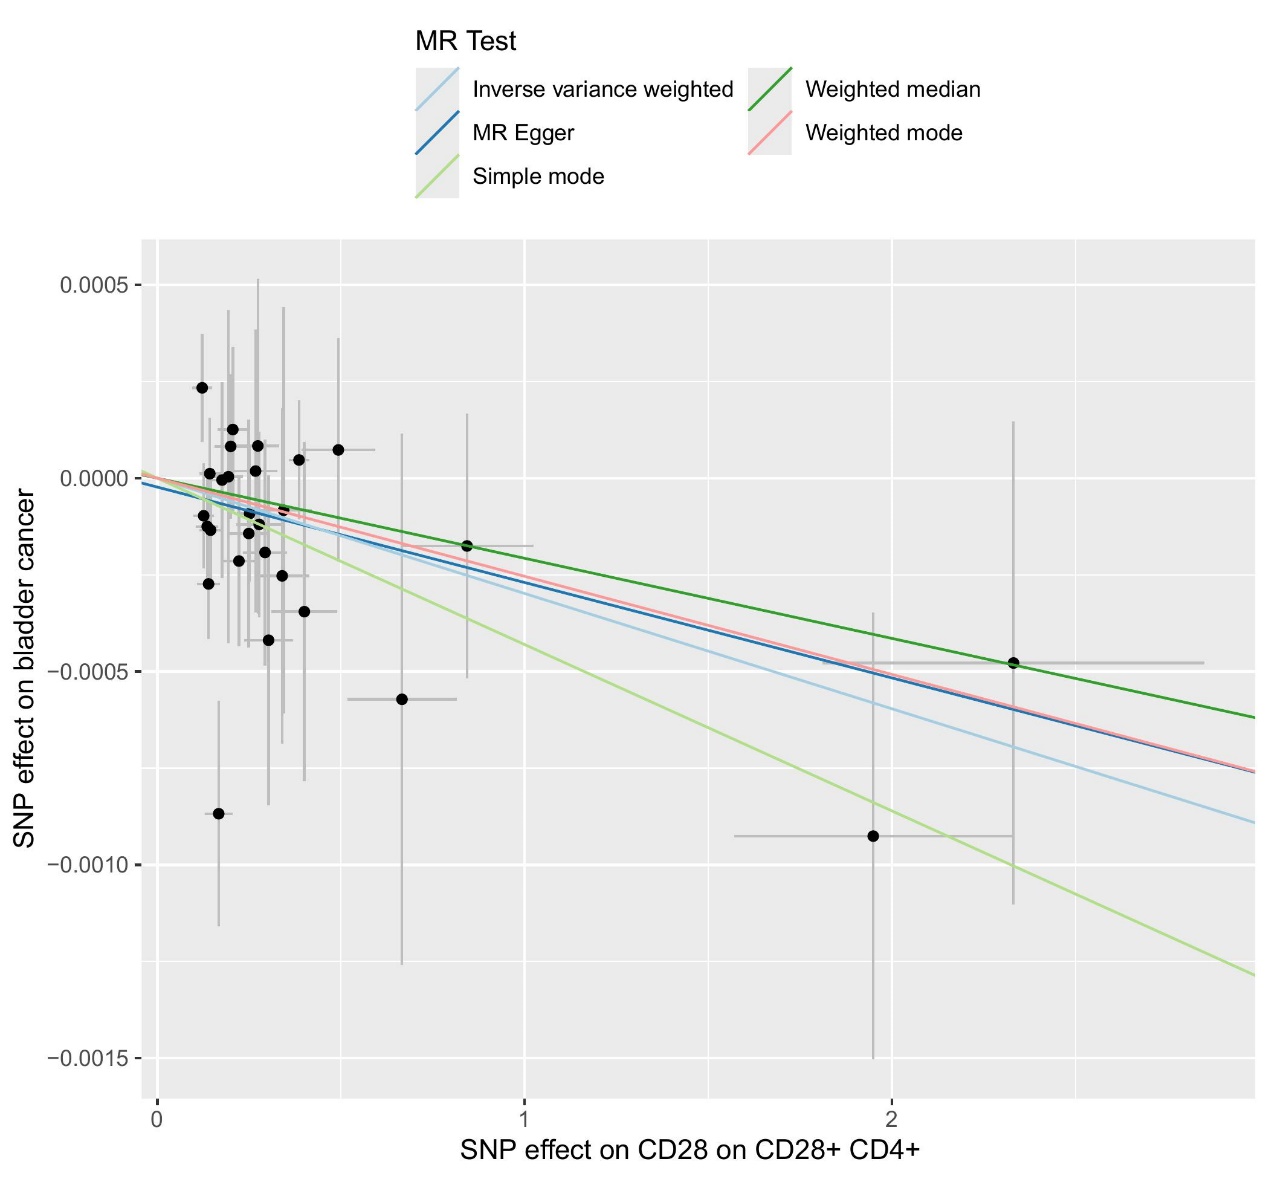

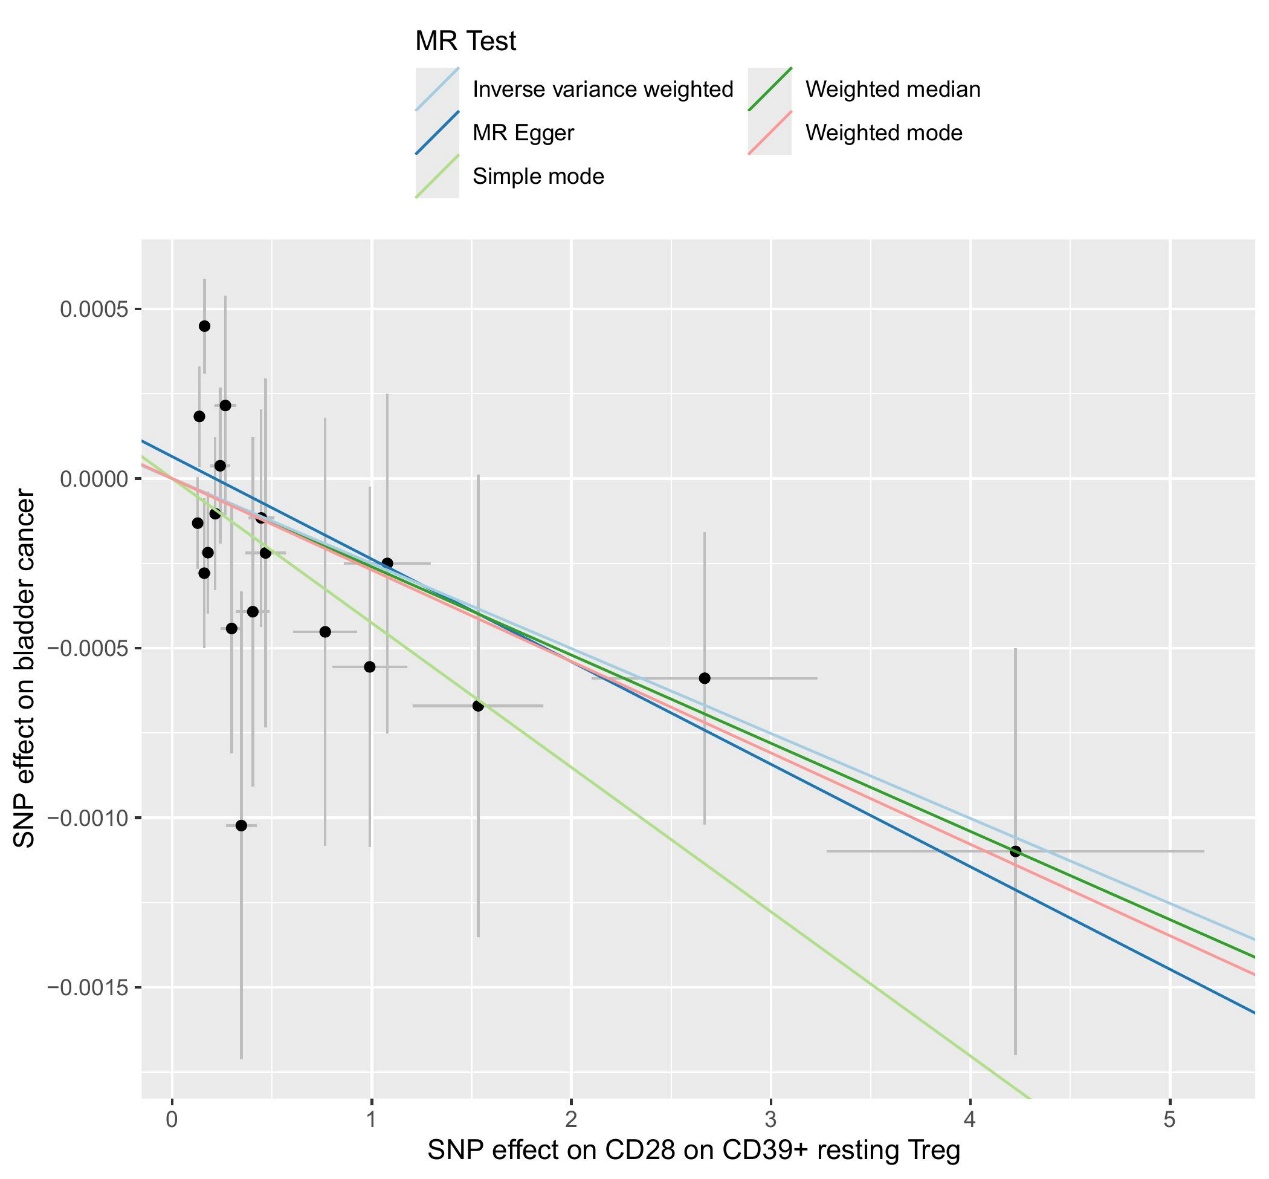

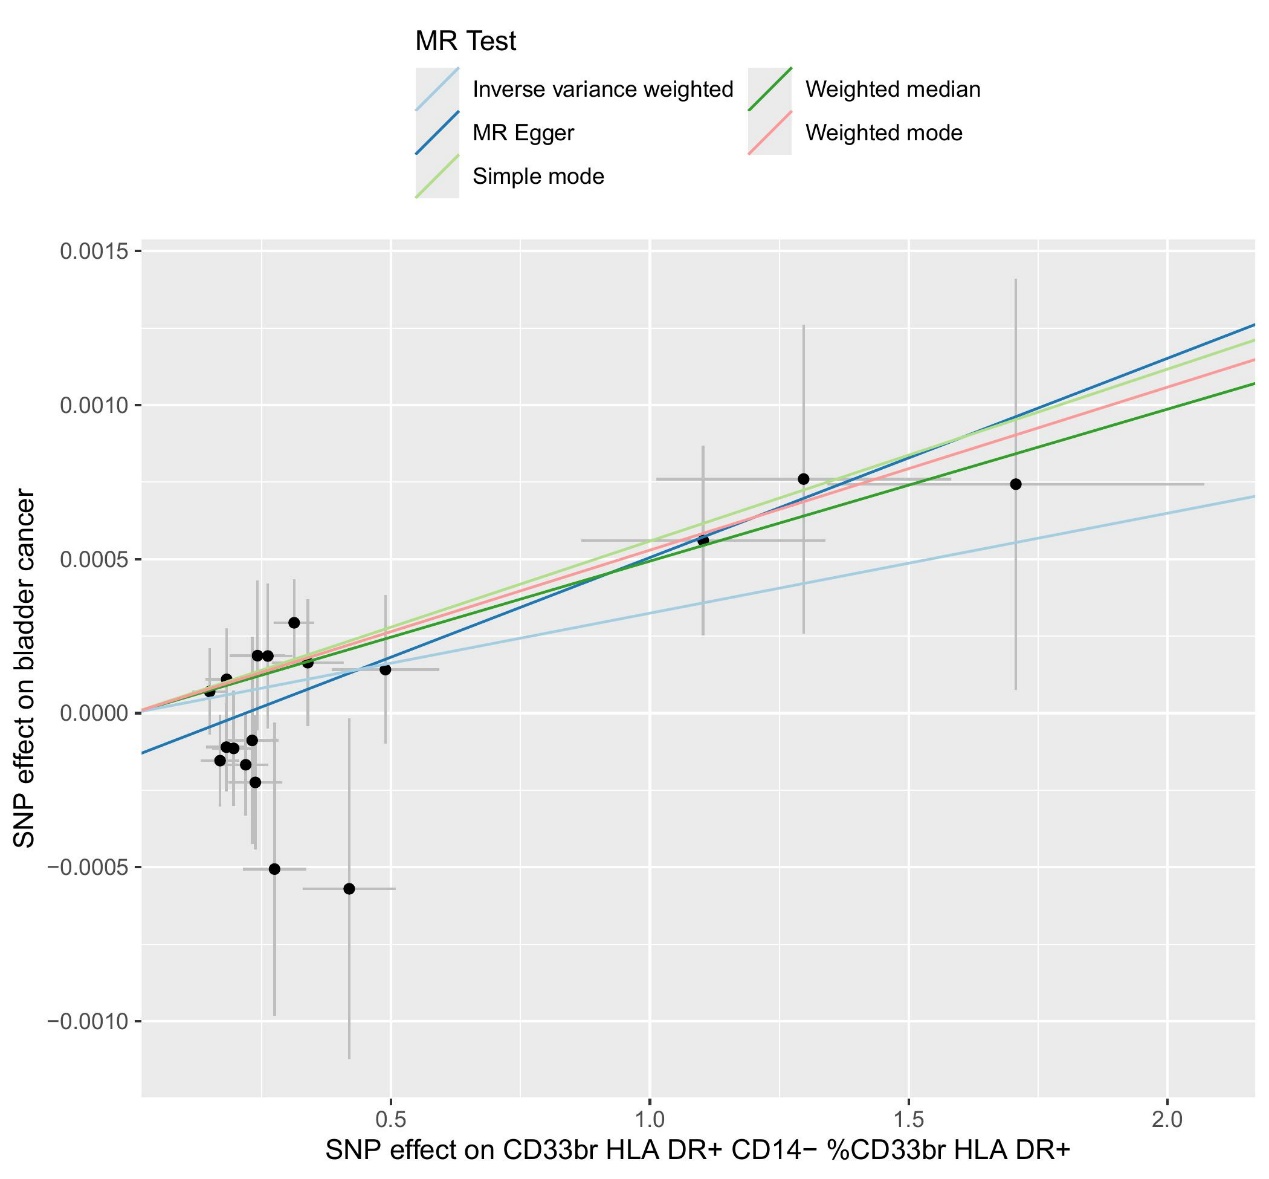

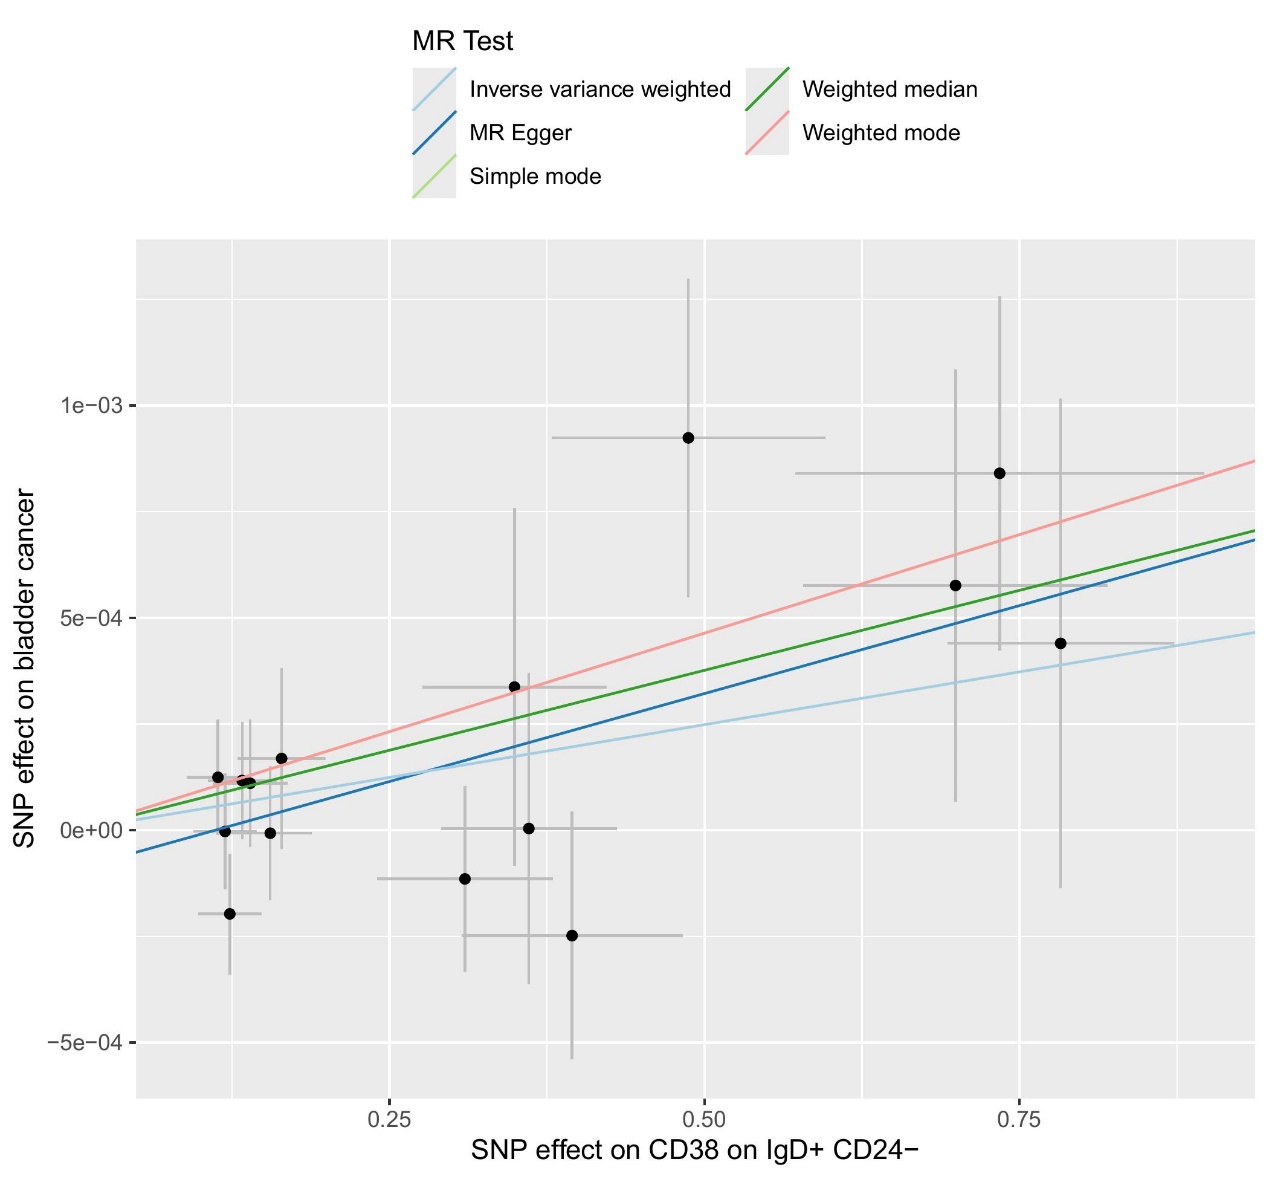

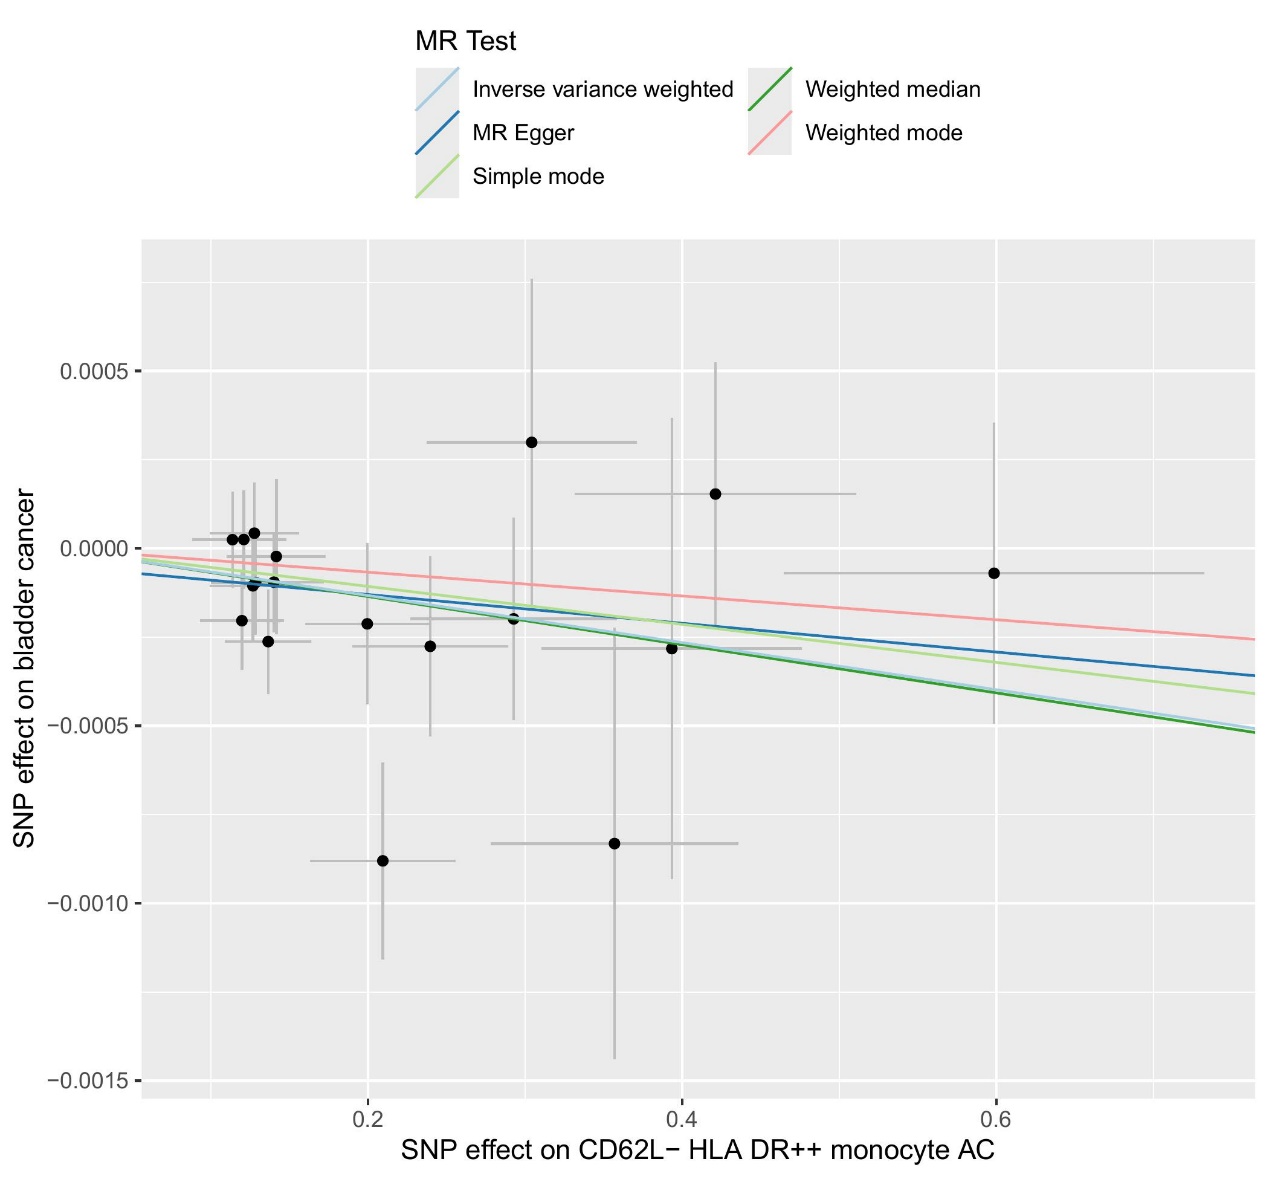

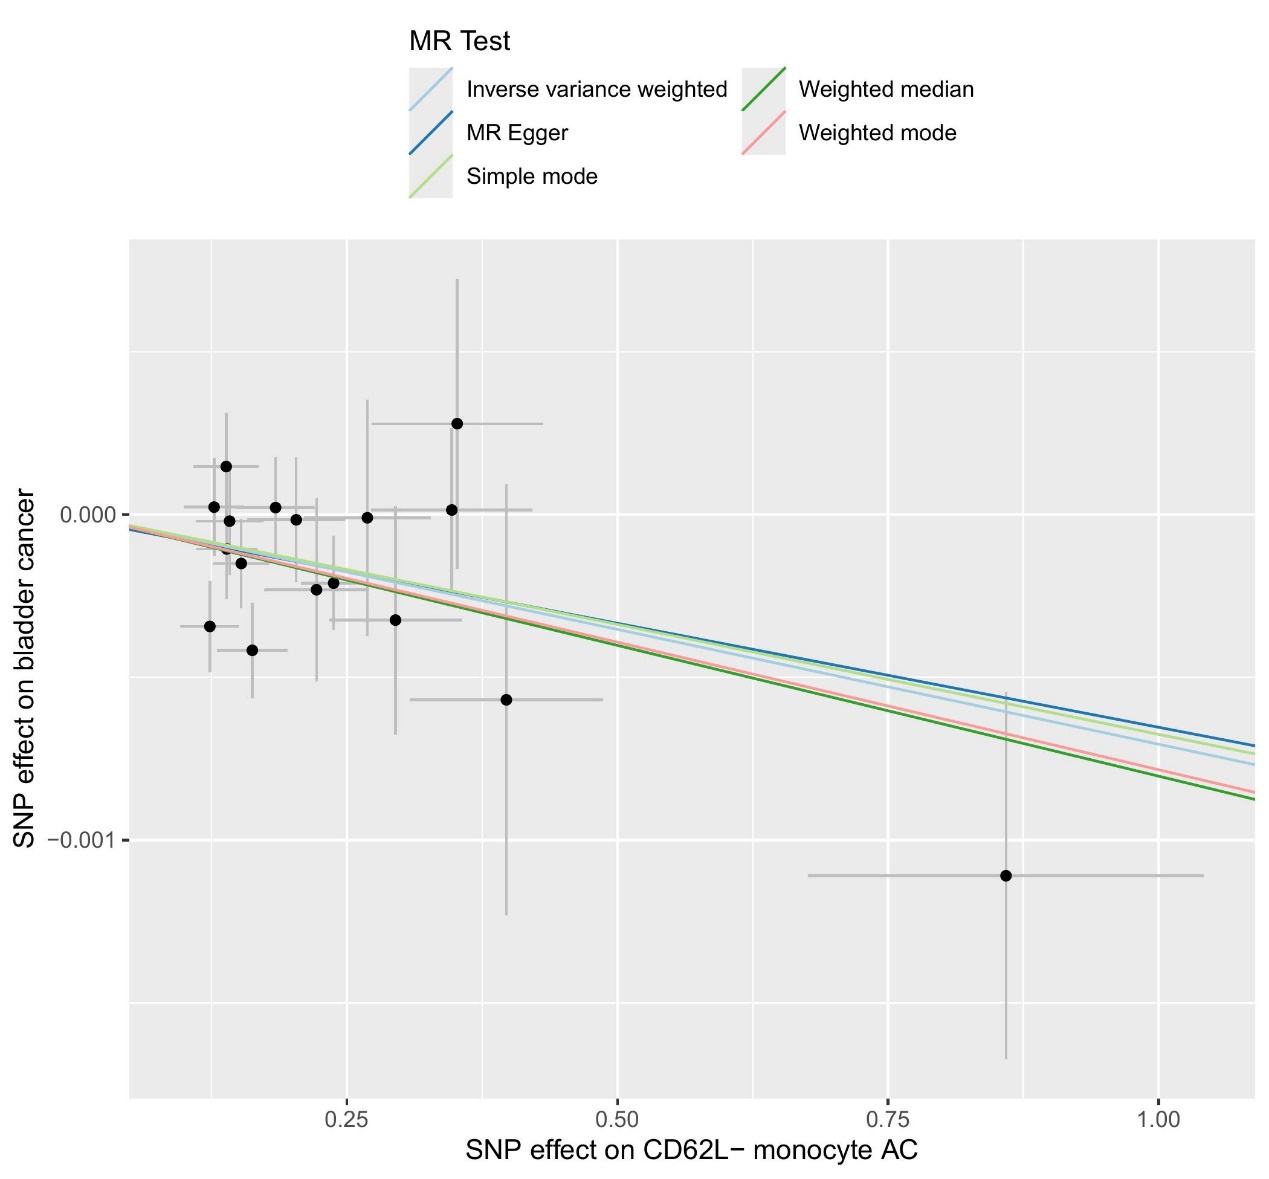

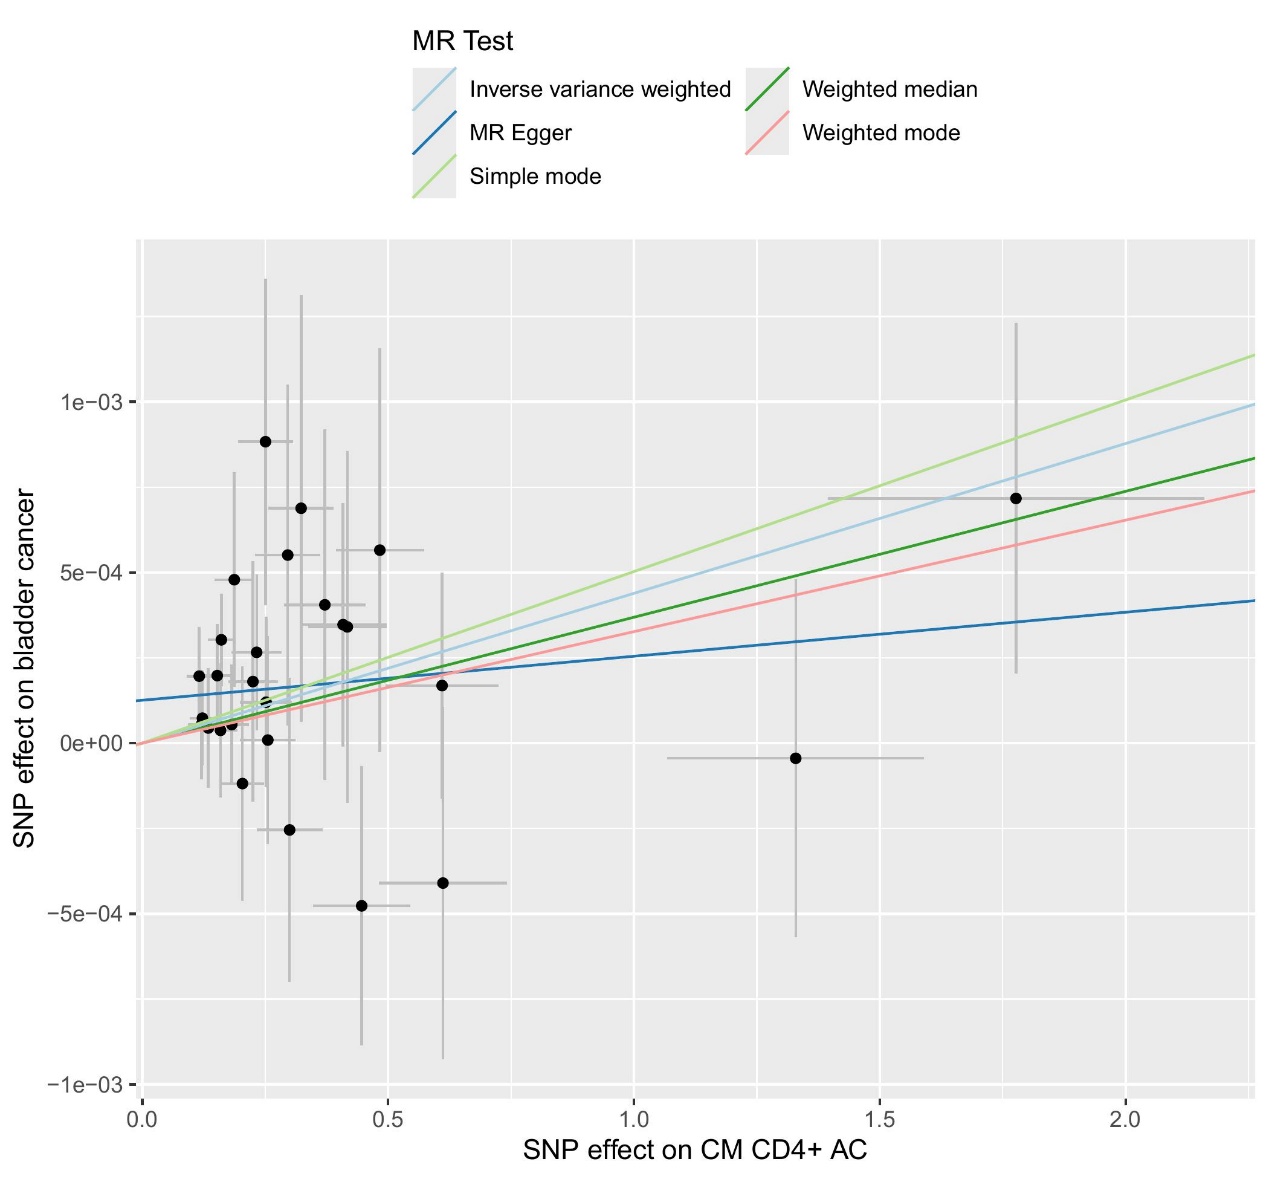

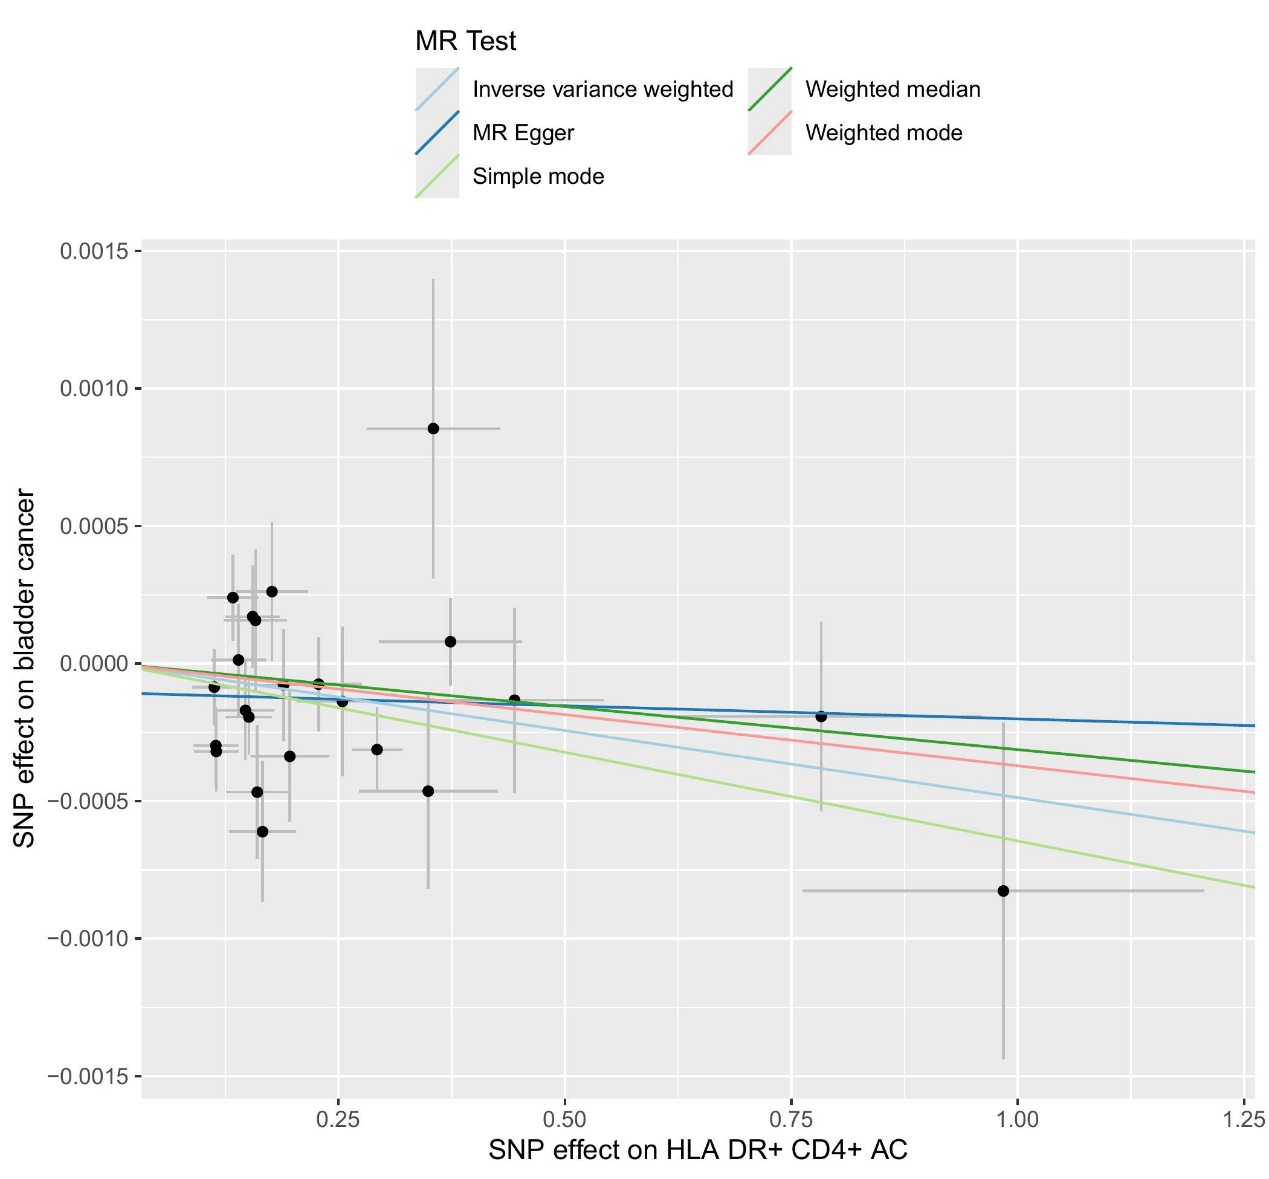

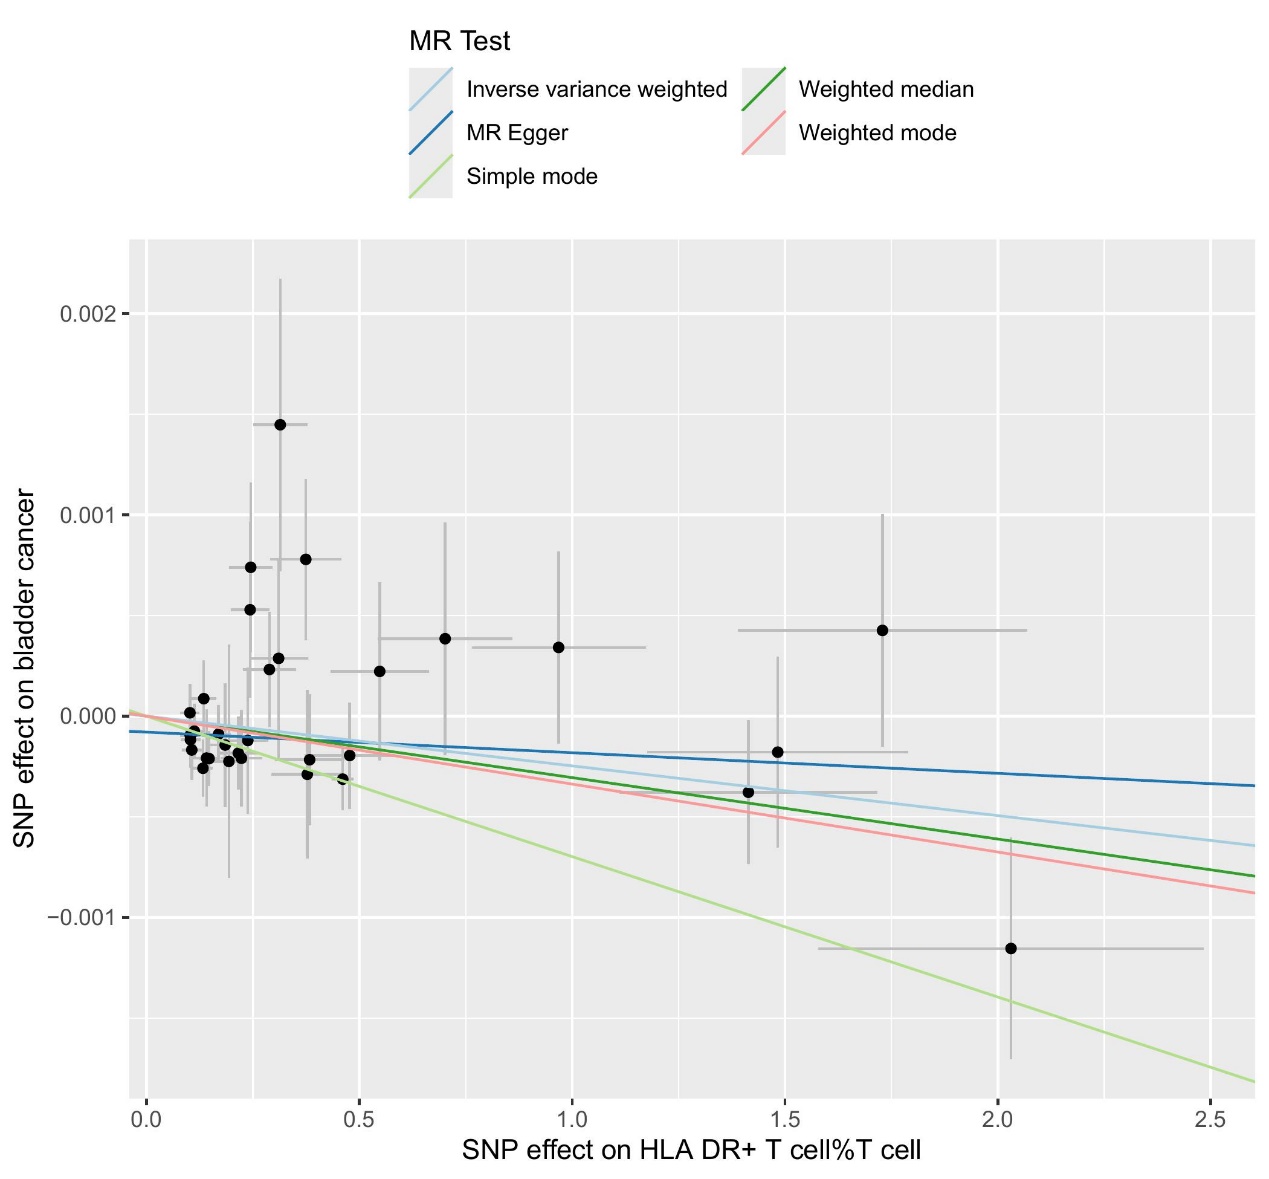

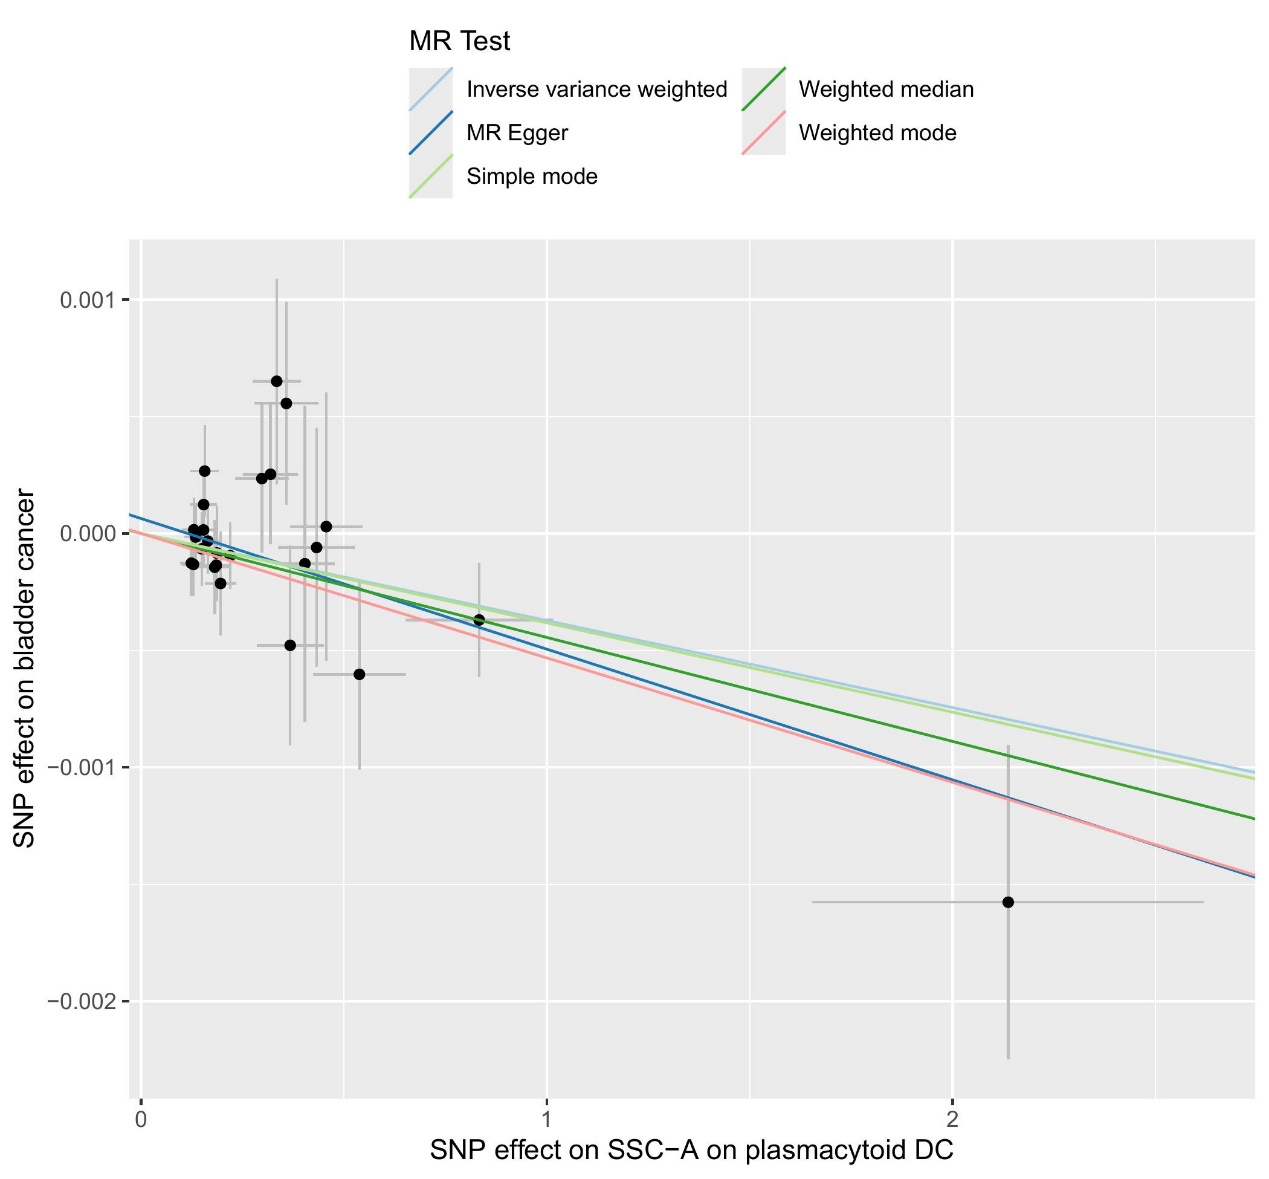
FIGURE 2** Scatterplot of genetic association between 16 immune traits and bladder cancer.

Supplement: Supplementary file 4 [file e67d0c4be4fe3e97ab06d316.docx]
